# Supplementary material for: Peer review of the pesticide risk assessment of the active substance S‐metolachlor excluding the assessment of the endocrine disrupting properties
Source: PubMed Central journal article supplement (PMC9972551; doi:10.2903/j.efsa.2023.7852), 2023-02-28

Annex to: Conclusion on the peer review of the pesticide risk assessment of the active substance s-metolachlor. doi:10.2903/j.efsa.2023.7852

© 2023 Wiley-VCH Verlag GmbH & Co. KgaA on behalf of the European Food Safety Authority.

## Appendix B – List of end points for the active substance and the representative formulation

### Identity, Physical and Chemical Properties, Details of Uses, Further Information (Regulation (EU) N° 283/2013, Annex Part A, points 1.3 and 3.2)

|                                    |               |
|------------------------------------|---------------|
| Active substance (ISO Common Name) | S-metolachlor |
| Function (e.g. fungicide)          | herbicide     |
| Rapporteur Member State            | Germany       |
| Co-rapporteur Member State         | France        |

### Identity (Regulation (EU) N° 283/2013, Annex Part A, point 1)

|                                                                                                                                           |                                                                                                                                                                                                                                                        |
|-------------------------------------------------------------------------------------------------------------------------------------------|--------------------------------------------------------------------------------------------------------------------------------------------------------------------------------------------------------------------------------------------------------|
| Chemical name (IUPAC)                                                                                                                     | A reaction mixture of 80–100% 2-chloro-2'-ethyl- <i>N</i> -[(1 <i>S</i> )-2-methoxy-1-methylethyl]-6'-methylacetanilide and 20–0% 2-chloro-2'-ethyl- <i>N</i> -[(1 <i>R</i> )-2-methoxy-1-methylethyl]-6'-methylacetanilide                            |
| Chemical name (CA)                                                                                                                        | Mixture of 2-chloro- <i>N</i> -(2-ethyl-6-methylphenyl)- <i>N</i> -[(1 <i>S</i> )-2-methoxy-1-methylethyl] acetamide (80-100 %) and 2-chloro- <i>N</i> -(2-ethyl-6-methylphenyl)- <i>N</i> -[(1 <i>R</i> )-2-methoxy-1-methylethyl] acetamide (20-0 %) |
| CIPAC No                                                                                                                                  | 607                                                                                                                                                                                                                                                    |
| CAS No                                                                                                                                    | 87392-12-9 (S-isomer)<br>178961-20-1 (R-isomer)                                                                                                                                                                                                        |
| EC No (EINECS or ELINCS)                                                                                                                  | 618-004-1 (S-isomer)                                                                                                                                                                                                                                   |
| FAO Specification (including year of publication)                                                                                         | -                                                                                                                                                                                                                                                      |
| Minimum purity of the active substance as manufactured                                                                                    | 960 g/kg (total content)<br>S-metolachlor min 840 g/kg<br>R-metolachlor max 130 g/kg                                                                                                                                                                   |
| Identity of relevant impurities (of toxicological, ecotoxicological and/or environmental concern) in the active substance as manufactured | Impurity 3 (CGA13656): max. 0.08 g/kg<br>Impurity 6 (CGA50259): max. 0.08 g/kg                                                                                                                                                                         |
| Location of the (proposed) reference specification (for significant impurities)                                                           | RAR confidential Volume 4                                                                                                                                                                                                                              |
| Molecular formula                                                                                                                         | C <sub>15</sub> H <sub>22</sub> ClNO <sub>2</sub>                                                                                                                                                                                                      |
| Molar mass                                                                                                                                | 283.8 g/mol                                                                                                                                                                                                                                            |

Structural formula

S-metolachlor is a mixture of the 1*S* and 1*R* isomers each of which is a racemic mixture of rotamers as demonstrated by the structural formulas:

CGA 77102 (S-isomers):

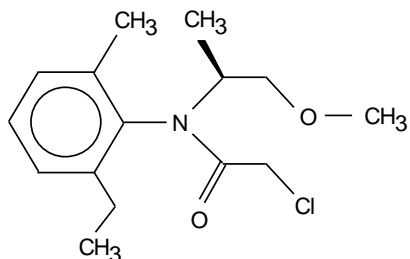

aS, 1*S*

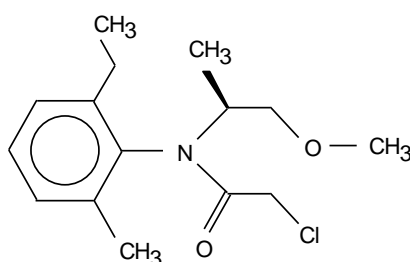

aR, 1*S*

CGA 77101 (R-isomers):

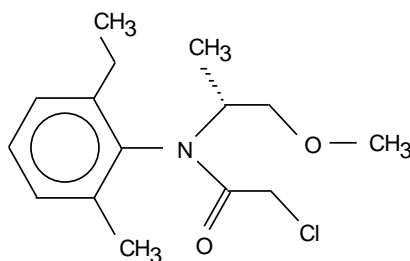

aR, 1*R*

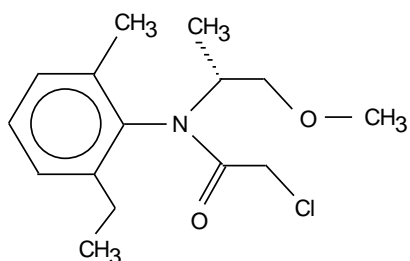

aS, 1*R*

**Physical and chemical properties (Regulation (EU) N° 283/2013, Annex Part A, point 2)**

|                                                                     |                                                                                                                                                                                                                                                                                                                                                                                                                                                                                                                |
|---------------------------------------------------------------------|----------------------------------------------------------------------------------------------------------------------------------------------------------------------------------------------------------------------------------------------------------------------------------------------------------------------------------------------------------------------------------------------------------------------------------------------------------------------------------------------------------------|
| Melting point (state purity)                                        | -61.1 °C (99.8 % (S+R), 88.4 % (S))                                                                                                                                                                                                                                                                                                                                                                                                                                                                            |
| Boiling point (state purity)                                        | approx. 334 °C (99.8 % (S+R), 88.4 % (S))                                                                                                                                                                                                                                                                                                                                                                                                                                                                      |
| Temperature of decomposition (state purity)                         | approx. 290 °C (99.8 % (S+R), 88.4 % (S))                                                                                                                                                                                                                                                                                                                                                                                                                                                                      |
| Appearance (state purity)                                           | Clear extremely pale-yellow liquid with a weak odour (99.8 % (S+R), 88.4 % (S))                                                                                                                                                                                                                                                                                                                                                                                                                                |
| Vapour pressure (state temperature, state purity)                   | $3.7 \times 10^{-3}$ Pa at 25 °C (99.8 % (S+R), 88.4 % (S))                                                                                                                                                                                                                                                                                                                                                                                                                                                    |
| Henry's law constant (state temperature)                            | $2.2 \times 10^{-3}$ Pa m <sup>3</sup> mol <sup>-1</sup> (25 °C)                                                                                                                                                                                                                                                                                                                                                                                                                                               |
| Solubility in water (state temperature, state purity and pH)        | 480 mg/L at 25 °C (pH 7.3) (99.8 % (S+R) 88.4 % (S))                                                                                                                                                                                                                                                                                                                                                                                                                                                           |
| Solubility in organic solvents (state temperature, state purity)    | solubility at 25 °C (98.5% (S+R) 87.4 (S))<br>n-hexane: completely miscible<br>toluene: completely miscible<br>dichloromethane: completely miscible<br>methanol: completely miscible<br>n-octanol: completely miscible<br>acetone: completely miscible<br>ethyl acetate: completely miscible                                                                                                                                                                                                                   |
| Surface tension (state concentration and temperature, state purity) | 54.3 mN/m - 54.5 mN/m at 22 °C (90 % saturated solution) (99.6 % (S+R) 89.3 % (S))                                                                                                                                                                                                                                                                                                                                                                                                                             |
| Partition coefficient (state temperature, pH and purity)            | log Pow = $3.05 \pm 0.02$ 25 at °C (pH 7) (99.8 % (S+R) 88.4 % (S))                                                                                                                                                                                                                                                                                                                                                                                                                                            |
| Dissociation constant (state purity)                                | No dissociation constant (pKa) in an accessible pH-range                                                                                                                                                                                                                                                                                                                                                                                                                                                       |
| UV/VIS absorption (max.) incl. $\epsilon$ (state purity, pH)        | Maxima (99.8 % (S+R), 88.4 % (S))<br>266.4 nm : $\epsilon = 534 \text{ L.mol}^{-1}.\text{cm}^{-1}$<br>274.4 nm : $\epsilon = 443 \text{ L.mol}^{-1}.\text{cm}^{-1}$<br>above 290 nm (99.8 % (S+R), 88.4 % (S)) (data from original DAR for S-metolachlor):<br>$\epsilon = 27.1 \text{ L.mol}^{-1}.\text{cm}^{-1}$ at pH 5<br>$\epsilon = 38.1 \text{ L.mol}^{-1}.\text{cm}^{-1}$ at pH 7<br>$\epsilon = 14.7 \text{ L.mol}^{-1}.\text{cm}^{-1}$ at pH 9<br>Data gap: spectral data for the relevant impurities |
| Flammability (state purity)                                         | Not applicable                                                                                                                                                                                                                                                                                                                                                                                                                                                                                                 |
| Explosive properties (state purity)                                 | Not explosive (98.5 % (S+R) 87.4% (S))                                                                                                                                                                                                                                                                                                                                                                                                                                                                         |
| Oxidising properties (state purity)                                 | Not oxidising (98.5 % (S+R) 87.4% (S))                                                                                                                                                                                                                                                                                                                                                                                                                                                                         |

**Summary of representative uses evaluated, for which all risk assessments needed to be completed (S-metolachlor)  
(Regulation (EU) N° 284/2013, Annex Part A, points 3, 4)**

| Crop and/or situation (a) | Member State or Country | Product Name | F G or I (b) | Pests or Group of pests controlled (c) | Preparation |                | Application       |                                     |                    |                                    | Application rate per treatment |                    |                         | PHI (days) (m) | Remarks |
|---------------------------|-------------------------|--------------|--------------|----------------------------------------|-------------|----------------|-------------------|-------------------------------------|--------------------|------------------------------------|--------------------------------|--------------------|-------------------------|----------------|---------|
|                           |                         |              |              |                                        | Type (d-f)  | Conc. a.s. (i) | method kind (f-h) | range of growth stages & season (j) | number min-max (k) | Interval between application (min) | g a.s. / hL min-max (l)        | Water L/ha min-max | g a.s. / ha min-max (l) |                |         |
| 1 - Maize                 | EU                      | A9396G       | F            | Annual grasses,                        | EC          | 960 g/L        | Foliar spray      | Pre-emergence crop BBCH 00-10       | 1                  | -                                  | 360-720                        | 200-400            | 1440                    | not relevant   | -       |
| 2 - Maize                 | EU                      | A9396G       | F            | Annual grasses,                        | EC          | 960 g/L        | Foliar spray      | Pre-emergence crop BBCH 00-10       | 1                  | -                                  | 312-624                        | 200-400            | 1248                    | not relevant   | -       |
| 3 - Maize                 | EU                      | A9396G       | F            | Annual grasses,                        | EC          | 960 g/L        | Foliar spray      | Post-emergence crop BBCH 11-18      | 1                  | -                                  | 360-720                        | 200-400            | 1440                    | not relevant   | -       |
| 4 - Maize                 | EU                      | A9396G       | F            | Annual grasses,                        | EC          | 960 g/L        | Foliar spray      | Post-emergence crop BBCH 11-18      | 1                  | -                                  | 312-624                        | 200-400            | 1248                    | not relevant   | -       |
| 5 - Sunflower             | EU                      | A9396G       | F            | Annual grasses,                        | EC          | 960 g/L        | Foliar spray      | Pre-emergence crop BBCH 00-09       | 1                  | -                                  | 360-720                        | 200-400            | 1440                    | not relevant   | -       |
| 6 - Sunflower             | EU                      | A9396G       | F            | Annual grasses,                        | EC          | 960 g/L        | Foliar spray      | Pre-emergence crop BBCH 00-09       | 1                  | -                                  | 312-624                        | 200-400            | 1248                    | not relevant   | -       |

(a) For crops, the EU and Codex classifications (both) should be taken into account; where relevant, the use situation should be described (e.g. fumigation of a structure)

(b) Outdoor or field use (F), greenhouse application (G) or indoor application (I)

(c) e.g. biting and sucking insects, soil born insects, foliar fungi, weeds

(d) e.g. wettable powder (WP), emulsifiable concentrate (EC), granule (GR)

(i) g/kg or g/L. Normally the rate should be given for the active substance (according to ISO) and not for the variant in order to compare the rate for same active substances used in different variants (e.g. fluoroxypyrr). **In certain cases, where only one variant is synthesised, it is more appropriate to give the rate for the variant (e.g. benthiaivalicarb-isopropyl).**

|                                                                                                                                                                                                                                                                                                                                                                                                                   |                                                                                                                                                                                                                                                                                                                                                                                                                                                                                                                                                        |
|-------------------------------------------------------------------------------------------------------------------------------------------------------------------------------------------------------------------------------------------------------------------------------------------------------------------------------------------------------------------------------------------------------------------|--------------------------------------------------------------------------------------------------------------------------------------------------------------------------------------------------------------------------------------------------------------------------------------------------------------------------------------------------------------------------------------------------------------------------------------------------------------------------------------------------------------------------------------------------------|
| <p>(e) CropLife International Technical Monograph no 2, 6th Edition. Revised May 2008. Catalogue of pesticide</p> <p>(f) All abbreviations used must be explained</p> <p>(g) Method, e.g. high volume spraying, low volume spraying, spreading, dusting, drench</p> <p>(h) Kind, e.g. overall, broadcast, aerial spraying, row, individual plant, between the plant- type of equipment used must be indicated</p> | <p>(j) Growth stage range from first to last treatment (BBCH Monograph, Growth Stages of Plants, 1997, Blackwell, ISBN 3-8263-3152-4), including where relevant, information on season at time of application</p> <p>(k) Indicate the minimum and maximum number of applications possible under practical conditions of use</p> <p>(l) The values should be given in g or kg whatever gives the more manageable number (e.g. 200 kg/ha instead of 200 000 g/ha or 12.5 g/ha instead of 0.0125 kg/ha)</p> <p>(m) PHI - minimum pre-harvest interval</p> |
|-------------------------------------------------------------------------------------------------------------------------------------------------------------------------------------------------------------------------------------------------------------------------------------------------------------------------------------------------------------------------------------------------------------------|--------------------------------------------------------------------------------------------------------------------------------------------------------------------------------------------------------------------------------------------------------------------------------------------------------------------------------------------------------------------------------------------------------------------------------------------------------------------------------------------------------------------------------------------------------|

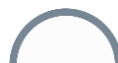

**Summary of additional intended uses for which MRL applications have been made, that in addition to the uses above, have also been considered in the consumer risk assessment**

**Regulation (EC) N° 1107/2009 Article 8.1(g)**

**Important note: efficacy, environmental risk and risk to humans by exposure other than via their diet have not been assessed for these uses**

| Crop and/or situation<br>(a)                                                         | Member State or Country | Product name | F G or I<br>(b) | Pests or Group of pests controlled<br>(c) | Preparation |                   | Application       |                                        |                       |                                       | Application rate per treatment |                    |                           | PHI (days)<br>(m) | Remarks |
|--------------------------------------------------------------------------------------|-------------------------|--------------|-----------------|-------------------------------------------|-------------|-------------------|-------------------|----------------------------------------|-----------------------|---------------------------------------|--------------------------------|--------------------|---------------------------|-------------------|---------|
|                                                                                      |                         |              |                 |                                           | Type (d-f)  | Conc. a.s.<br>(i) | method kind (f-h) | range of growth stages & season<br>(j) | number min-max<br>(k) | Interval between application<br>(min) | kg a.s./hL min-max<br>(l)      | Water L/ha min-max | kg a.s./ha min-max<br>(l) |                   |         |
| <b>MRL Application</b> (according to Article 8.1(g) of Regulation (EC) No 1107/2009) |                         |              |                 |                                           |             |                   |                   |                                        |                       |                                       |                                |                    |                           |                   |         |
| Not applicable                                                                       |                         |              |                 |                                           |             |                   |                   |                                        |                       |                                       |                                |                    |                           |                   |         |

- (a) For crops, the EU and Codex classifications (both) should be taken into account; where relevant, the use situation should be described (e.g. fumigation of a structure)
- (b) Outdoor or field use (F), greenhouse application (G) or indoor application (I)
- (c) e.g. biting and sucking insects, soil born insects, foliar fungi, weeds
- (d) e.g. wettable powder (WP), emulsifiable concentrate (EC), granule (GR)
- (e) CropLife International Technical Monograph no 2, 6th Edition. Revised May 2008. Catalogue of pesticide
- (f) All abbreviations used must be explained
- (g) Method, e.g. high volume spraying, low volume spraying, spreading, dusting, drench
- (h) Kind, e.g. overall, broadcast, aerial spraying, row, individual plant, between the plant- type of equipment used must be indicated

- (i) g/kg or g/L. Normally the rate should be given for the active substance (according to ISO) and not for the variant in order to compare the rate for same active substances used in different variants (e.g. fluoroxypyr). **In certain cases, where only one variant is synthesised, it is more appropriate to give the rate for the variant (e.g. benthialicarb-isopropyl).**
- (j) Growth stage range from first to last treatment (BBCH Monograph, Growth Stages of Plants, 1997, Blackwell, ISBN 3-8263-3152-4), including where relevant, information on season at time of application
- (k) Indicate the minimum and maximum number of applications possible under practical conditions of use
- (l) The values should be given in g or kg whatever gives the more manageable number (e.g. 200 kg/ha instead of 200 000 g/ha or 12.5 g/ha instead of 0.0125 kg/ha)
- (m) PHI - minimum pre-harvest interval

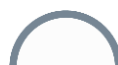

**Further information, Efficacy**

**Effectiveness (Regulation (EU) N° 284/2013, Annex Part A, point 6.2)**

Representative uses of ‘A9396G’,= Dual Gold EC960, to control annual grasses and annual broadleaf weeds in several arable crops, such as maize and sunflower are supported.

**Adverse effects on field crops (Regulation (EU) N° 284/2013, Annex Part A, point 6.4)**

The formulation for representative uses (‘A9396G’, Dual Gold EC960) is registered in several arable crops. When the product is applied correctly, according to the label recommendations it has no adverse effect either on yield or quality of the final produce.

**Observations on other undesirable or unintended side-effects (Regulation (EU) N° 284/2013, Annex Part A, point 6.5)**

The formulation for representative uses (‘A9396G’, Dual Gold EC960) does not pose any risk to adjacent or succeeding crops when it is used according to directions for use.

**Groundwater metabolites: Screening for biological activity (SANCO/221/2000-rev.10-final Step 3 a Stage 1)**

|                                  |               |               |                       |                        |               |               |
|----------------------------------|---------------|---------------|-----------------------|------------------------|---------------|---------------|
| Activity against target organism | SYN5<br>47977 | CGA3<br>7735  | SYN5<br>42488         | SYN5<br>42492          | SYN5<br>42491 | SYN5<br>42489 |
|                                  | yes           | no            | no                    | no                     | no            | no            |
|                                  | SYN5<br>42607 | CGA5<br>0267  | CGA4<br>0172          | CGA5<br>0720           | NOA4<br>36611 | CGA3<br>68208 |
|                                  | no            | no            | no                    | no                     | no            | no            |
|                                  | NOA4<br>13173 | CGA3<br>57704 | CGA5<br>1202<br>(OXA) | CGA3<br>54743<br>(ESA) | SYN5<br>42490 | SYN5<br>45027 |
|                                  | no            | no            | no                    | no                     | no            | Data<br>gap   |
|                                  | SYN5<br>47969 | SYN5<br>45026 |                       |                        |               |               |
|                                  | no            | Data<br>gap   |                       |                        |               |               |

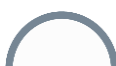

## Methods of Analysis

### Analytical methods for the active substance (Regulation (EU) N° 283/2013, Annex Part A, point 4.1 and Regulation (EU) N° 284/2013, Annex Part A, point 5.2)

|                                                     |                                                                                                                                                                                                                 |
|-----------------------------------------------------|-----------------------------------------------------------------------------------------------------------------------------------------------------------------------------------------------------------------|
| Technical a.s. (analytical technique)               | metolachlor (total content S- and R- isomers): GC-FID<br>S-isomer (CGA77102) and R-isomer (CGA77101):<br>HPLC-UV, chiral method                                                                                 |
| Impurities in technical a.s. (analytical technique) | GC-FID<br>Data gap: method (s) for impurity 3 and impurity 6 in the technical material with a LOQ at least 20% less than the specification limit of 0.08 g/kg                                                   |
| Plant protection product (analytical technique)     | metolachlor (total content S and R isomers): HPLC-UV<br>S-isomer (CGA77102) and R-isomer (CGA77101):<br>HPLC-UV, chiral method<br>Data gap: method for relevant impurities imp. 3 and imp. 6 in the formulation |

### Analytical methods for residues (Regulation (EU) N° 283/2013, Annex Part A, point 4.2 & point 7.4.2)

#### Residue definitions for monitoring purposes

|                         |                                                                                                                                                                                                                                                                                                                         |
|-------------------------|-------------------------------------------------------------------------------------------------------------------------------------------------------------------------------------------------------------------------------------------------------------------------------------------------------------------------|
| Food of plant origin    | Metolachlor including other mixtures of constituent isomers including S-metolachlor (sum of isomers)                                                                                                                                                                                                                    |
| Food of animal origin   | Metolachlor including other mixtures of constituent isomers including S-metolachlor (sum of isomers)<br>Provisional – Pending outcome of the identified data gap <sup>(1)</sup> in Residues section and potential carry-over of CGA 133275, free and conjugated from feed items in rotational crops to animal matrices. |
| Soil                    | metolachlor (mixture of constituent isomers)                                                                                                                                                                                                                                                                            |
| Sediment                | metolachlor (mixture of constituent isomers)                                                                                                                                                                                                                                                                            |
| Water                   | metolachlor (mixture of constituent isomers)                                                                                                                                                                                                                                                                            |
| surface                 |                                                                                                                                                                                                                                                                                                                         |
| drinking/ground         | metolachlor, CGA354743 (ESA), CGA51202 (OXA), CGA357704, CGA368208, CGA37735, CGA40172, CGA50720, NOA413173, NOA436611, SYN542488, SYN542489, SYN542490, SYN542491, SYN542492, SYN542607, SYN545026, SYN545027, SYN547969, SYN547977 all mixtures of constituent isomers                                                |
| Air                     | metolachlor (mixture of constituent isomers)                                                                                                                                                                                                                                                                            |
| Body fluids and tissues | Metolachlor (mixture of constituent isomers) and CGA46129<br>Open for (S-) metolachlor mercapturate                                                                                                                                                                                                                     |



## Monitoring/Enforcement methods

Food/feed of plant origin (analytical technique and LOQ for methods for monitoring purposes)

QuEChERS multiresidue method (EN 15662:2008):  
LC-MS/MS, LOQ = 0.01 mg/kg for metolachlor in high water content, high acid content, dry and fatty matrix. Confirmatory method is available. ILV is available.  
Extraction efficiency not verified (not required, since residues above LOQ in all matrix groups, as a result of the representative uses, were not found)

Food/feed of animal origin (analytical technique and LOQ for methods for monitoring purposes)

QuEChERS multiresidue method (EN 15662:2008):  
LC-MS/MS, LOQ = 0.01 mg/kg for metolachlor in milk, egg, meat, liver, fat. Confirmatory method is available. ILV is available.  
Extraction efficiency not verified.  
Whether the extraction efficiency needs to be addressed is pending upon the finalisation of the livestock exposure assessment and whether residues above the LOQ are expected in animal matrices

Soil (analytical technique and LOQ)

Method GRM016.03A  
LC-MS/MS; LOQ = 0.01 mg/kg for metolachlor, CGA-51202, CGA-354743. Confirmatory method is available.

Water (analytical technique and LOQ)

Method GRM016.02A  
LC-MS/MS, LOQ = 0.01 µg/L for metolachlor, LOQ = 0.05 µg/L for CGA-51202, CGA-354743, each in drinking water, ground water and surface water. Confirmatory method is available. ILV for drinking water is available.  
Method GRM016.08A  
LC-MS/MS, LOQ = 0.05 µg/L for SYN542492, SYN547977, CGA-40172, CGA-41507 each in ground water and surface water. Confirmatory method is available.  
ILV for drinking water.  
Method GRM016.07A  
LC-MS/MS, LOQ = 0.05 µg/L for CGA357704, CGA368208, CGA50720, NOA413173 and NOA436611 each in ground water and surface water. Confirmatory method is available.  
Data gap for ILV  
Data gap for a method for other compounds in the ground/drinking water residue definition.

Air (analytical technique and LOQ)

Method RAM 456/01  
LC-MS/MS, LOQ = 4.5 µg/m<sup>3</sup> for metolachlor  
Method REM 186.04  
GC-ECD, LOQ = 5 µg/m<sup>3</sup> for metolachlor

Body fluids and tissues (analytical technique and LOQ)

QuEChERS multiresidue method (EN 15662:2008):  
LC-MS/MS, LOQ = 0.01 mg/kg for metolachlor in body fluid (blood) and tissues. Confirmatory method is available.  
Data gap for gap for monitoring method for the metabolite CGA46129  
Open for (S-) metolachlor mercapturate

**Classification and labelling with regard to physical and chemical data (Regulation (EU) N° 283/2013, Annex Part A, point 10)**

Substance

S-metolachlor

Harmonised classification according to Regulation (EC) No 1272/2008 and its Adaptations to Technical Process [Table 3.1 of Annex VI of Regulation (EC) No 1272/2008 as amended]<sup>1</sup>:

No classification

According to the Peer review, the criteria for classification may be met for:

No proposal

---

<sup>1</sup> Regulation (EC) No 1272/2008 of the European Parliament and of the Council of 16 December 2008 on classification, labelling and packaging of substances and mixtures, amending and repealing Directives 67/548/EEC and 1999/45/EC, and amending Regulation (EC) No 1907/2006. OJ L 353, 31.12.2008, 1-1355.



### Impact on Human and Animal Health

It is noted that the toxicity of S-metolachlor can be bridged from metolachlor; the studies reported under this chapter are performed with S-metolachlor unless otherwise reported (metolachlor).

#### Absorption, distribution, metabolism and excretion (toxicokinetics) (Regulation (EU) N° 283/2013, Annex Part A, point 5.1)

|                                                             |                                                                                                                                                                                                                                                                                                        |
|-------------------------------------------------------------|--------------------------------------------------------------------------------------------------------------------------------------------------------------------------------------------------------------------------------------------------------------------------------------------------------|
| Rate and extent of oral absorption/systemic bioavailability | ≥ 85 % within 48h based on urinary and biliary excretion                                                                                                                                                                                                                                               |
| Toxicokinetics                                              | For 0.5 mg/kg bw dose level:<br>C <sub>max</sub> approx. 0.03 mg/kg;<br>T <sub>max</sub> approx. 8 h;<br>T <sub>1/2</sub> approx. 24-31 h<br>AUC 0.8 mg.h/kg                                                                                                                                           |
| Distribution                                                | Widely distributed: quite uniformly, primarily in well-perfused organs and red blood cells                                                                                                                                                                                                             |
| Potential for bioaccumulation                               | No evidence for accumulation: decrease to very low levels at d7 (max 0.22% of dose in liver)                                                                                                                                                                                                           |
| Rate and extent of excretion                                | Rapidly excreted (mostly within 48 h), mainly via faeces (53%, major biliary excretion) and urine (42 %) at high dose                                                                                                                                                                                  |
| Metabolism in animals                                       | Extensive metabolisation; *oxidative reactions (80 %):<br>(i) cleavage of the methyl ether, (ii) oxidation of the resultant alcohol to the corresponding acid, (iii) oxidation of the aryl methyl and/or ethyl groups, and (iv) substitution of the chlorine atom<br>* glutathione conjugations (20 %) |
| <i>In vitro</i> metabolism                                  | Metabolite M4 identified in human microsomes only (4% radioactivity), metabolite M9 major metabolite in humans but not in rats (39% vs 11%). Identity or toxicological profile of M4 and M9 not available (data gap).<br>No information on metabolism in other key species available (data gap).       |
| Toxicologically relevant compounds (animals and plants)     | S-metolachlor                                                                                                                                                                                                                                                                                          |
| Toxicologically relevant compounds (environment)            | S-metolachlor and groundwater metabolites >0.1 µg/L                                                                                                                                                                                                                                                    |

#### Acute toxicity (Regulation (EU) N° 283/2013, Annex Part A, point 5.2)

|                                 |                                 |             |
|---------------------------------|---------------------------------|-------------|
| Rat LD <sub>50</sub> oral       | > 2000 mg/kg bw (rat, mouse)    |             |
| Rat LD <sub>50</sub> dermal     | > 2000 mg/kg bw (rabbit)        |             |
| Rat LC <sub>50</sub> inhalation | > 2.91 mg/L air /4h (nose only) |             |
| Skin irritation                 | Non-irritant                    |             |
| Eye irritation                  | Non-irritant                    |             |
| Skin sensitisation              | Sensitising (M&K, Buehler)      | <b>H317</b> |

|               |                                                                                             |  |
|---------------|---------------------------------------------------------------------------------------------|--|
| Phototoxicity | No phototoxicity > 315 nm but test material absorbs mainly at wavelengths <315nm (data gap) |  |
|---------------|---------------------------------------------------------------------------------------------|--|

**Short-term toxicity (Regulation (EU) N° 283/2013, Annex Part A, point 5.3)**

|                                |                                                                                                                                                                                                                                                                                                                                                                                                                                                                                                         |  |
|--------------------------------|---------------------------------------------------------------------------------------------------------------------------------------------------------------------------------------------------------------------------------------------------------------------------------------------------------------------------------------------------------------------------------------------------------------------------------------------------------------------------------------------------------|--|
| Target organ / critical effect | <p><b>Rat:</b> liver (increased weight, changes in clinical chemistry parameters, centrilobular hypertrophy, eosinophilic inclusions), kidney (increased weight, changes in clinical chemistry parameters and urine analysis), decreased body weight (gain)</p> <p><b>Dog:</b> liver (increased weight, increased alkaline phosphatase, acute perivascular inflammation), blood (changes in red blood cell parameters), decreased body weight (gain)</p> <p><b>Rabbit:</b> liver (increased weight)</p> |  |
| Relevant oral NOAEL            | <p>28-day rat (2 studies, 1 with metolachlor): 24.5 mg/kg bw per day</p> <p>90-day rat (3 studies, 1 with metolachlor): 20 mg/kg bw per day</p> <p>6-month, dog (metolachlor): 2.92 mg/kg bw per day</p>                                                                                                                                                                                                                                                                                                |  |
| Relevant dermal NOAEL          | <p>21-day, rabbit (metolachlor): systemic effects (increased liver weight): 100 mg/kg bw per day</p> <p>local effects: LOAEL 10 mg/kg bw per day (erythema and hyperkeratosis)</p>                                                                                                                                                                                                                                                                                                                      |  |
| Relevant inhalation NOAEL      | No study submitted – not required                                                                                                                                                                                                                                                                                                                                                                                                                                                                       |  |

**Genotoxicity (Regulation (EU) N° 283/2013, Annex Part A, point 5.4)**

|                            |                                                                                                                                                                                                                                                                                                                                                                                                                                                        |  |
|----------------------------|--------------------------------------------------------------------------------------------------------------------------------------------------------------------------------------------------------------------------------------------------------------------------------------------------------------------------------------------------------------------------------------------------------------------------------------------------------|--|
| <i>In vitro</i> studies    | <p>Mutagenicity tests:</p> <ul style="list-style-type: none"> <li>- in bacterial cells (Ames tests) (3): negative</li> <li>- in mammalian cells (HGPRT &amp; MLA): negative</li> </ul> <p>Clastogenicity tests:</p> <ul style="list-style-type: none"> <li>- in human lymphocytes: equivocal (non-reproducible structural chromosome aberration in one test)</li> <li>- micronucleus test: equivocal (positive but not reproducible result)</li> </ul> |  |
| <i>In vivo</i> studies     | Micronucleus tests (2): negative (bone marrow exposure sufficiently demonstrated, albeit only for a short time period)                                                                                                                                                                                                                                                                                                                                 |  |
| Photomutagenicity          | No study submitted – not required                                                                                                                                                                                                                                                                                                                                                                                                                      |  |
| Potential for genotoxicity | S-metolachlor is unlikely to be genotoxic                                                                                                                                                                                                                                                                                                                                                                                                              |  |

**Long-term toxicity and carcinogenicity (Regulation (EU) N°283/2013, Annex Part A, point 5.5)**

|                                                  |                                                                                                                                                                                                   |                |
|--------------------------------------------------|---------------------------------------------------------------------------------------------------------------------------------------------------------------------------------------------------|----------------|
| Long-term effects (target organ/critical effect) | Rat (metolachlor): liver, body weight (gain) (bw)<br>Mouse: unacceptable study with many deviations (data gap)                                                                                    |                |
| Relevant long-term NOAEL                         | 2-year, rat: 15 mg/kg bw per day                                                                                                                                                                  |                |
| Carcinogenicity (target organ, tumour type)      | Rat:<br>- liver: hepatocellular focal alterations and “foci + carcinoma” (m & f);<br>- pituitary: adenoma and carcinoma (f);<br>- thyroid: adenoma (f);<br>- nasal turbinates: adenocarcinoma (m) | Cat. 2<br>H351 |
| Relevant NOAEL for carcinogenicity               | 2-year, rat: 15 mg/kg bw per day                                                                                                                                                                  |                |

**Reproductive toxicity (Regulation (EU) N° 283/2013, Annex Part A, point 5.6)**

**Reproduction toxicity**

|                                       |                                                                                                                                                                                                                           |  |
|---------------------------------------|---------------------------------------------------------------------------------------------------------------------------------------------------------------------------------------------------------------------------|--|
| Reproduction target / critical effect | <u>Rat 2-generation study (metolachlor):</u><br>Parental toxicity: ↑ relative liver and thyroid weights, ↓ food intake<br>Reproductive toxicity: no adverse effect<br>Offspring’s toxicity: decreased body weight in pups |  |
| Relevant parental NOAEL               | 17.7 mg/kg bw per day                                                                                                                                                                                                     |  |
| Relevant reproductive NOAEL           | 54.9 mg/kg bw per day (highest dose tested)                                                                                                                                                                               |  |
| Relevant offspring NOAEL              | 17.7 mg/kg bw per day                                                                                                                                                                                                     |  |

**Developmental toxicity**

|                                        |                                                                                                                                                                                                                                                                                                                                                                                                                                                                                                                    |  |
|----------------------------------------|--------------------------------------------------------------------------------------------------------------------------------------------------------------------------------------------------------------------------------------------------------------------------------------------------------------------------------------------------------------------------------------------------------------------------------------------------------------------------------------------------------------------|--|
| Developmental target / critical effect | <u>Rat:</u><br>Maternal toxicity: clinical signs, decreased bw(gain) and food consumption (after initial few doses)<br>Developmental toxicity: decreased foetal weight, skeletal variations (study with S-metolachlor), ossification delay (study with metolachlor)<br><u>Rabbit:</u><br>Maternal toxicity: clinical signs, decreased bw(gain) and food consumption<br>Developmental toxicity: decreased foetal weight, increase in skeletal variations (fully formed ribs) and malformations (e.g. hydrocephalus) |  |
| Relevant maternal NOAEL                | Rat: 50 mg/kg bw per day<br>Rabbit: 100 mg/kg bw per day                                                                                                                                                                                                                                                                                                                                                                                                                                                           |  |

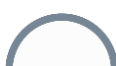

Relevant developmental NOAEL

|                              |  |
|------------------------------|--|
| Rat: 300 mg/kg bw per day    |  |
| Rabbit: 100 mg/kg bw per day |  |

**Neurotoxicity (Regulation (EU) N° 283/2013, Annex Part A, point 5.7)**

Acute neurotoxicity

|                               |  |
|-------------------------------|--|
| No study submitted (data gap) |  |
|-------------------------------|--|

Repeated neurotoxicity

|                               |  |
|-------------------------------|--|
| No study submitted (data gap) |  |
|-------------------------------|--|

Additional studies (e.g. delayed neurotoxicity, developmental neurotoxicity)

|                               |  |
|-------------------------------|--|
| No study submitted (data gap) |  |
|-------------------------------|--|

**Other toxicological studies (Regulation (EU) N° 283/2013, Annex Part A, point 5.8)**

Supplementary studies on the active substance

|                                                                                                                                                                                                                                                                                                                           |
|---------------------------------------------------------------------------------------------------------------------------------------------------------------------------------------------------------------------------------------------------------------------------------------------------------------------------|
| Enzyme induction and proliferative changes in rat liver caused by a mode of action only to some extent similar to phenobarbital. Other possible mechanisms responsible for tumor formation cannot be excluded.<br>Immunotoxicity: adverse effects observed on immune-related parameters in rats, dogs and mice (data gap) |
|---------------------------------------------------------------------------------------------------------------------------------------------------------------------------------------------------------------------------------------------------------------------------------------------------------------------------|

Endocrine disrupting properties

|                                                                                                                                                                                                                     |
|---------------------------------------------------------------------------------------------------------------------------------------------------------------------------------------------------------------------|
| Data gap, further data (level 5) needed to conclude on ED potential (EAS-modalities) The peer review conclusion will be finalised without the ED assessment following the receipt of the mandate in September 2022. |
|---------------------------------------------------------------------------------------------------------------------------------------------------------------------------------------------------------------------|

Studies performed on metabolites or impurities

| <u>Metabolite</u>                                                                    | <u>Genotoxicity</u>                                                                                                                  | <u>General toxicity</u><br>(doses in mg/kg bw (per day))                                                                                                                                                                                                                                                   |
|--------------------------------------------------------------------------------------|--------------------------------------------------------------------------------------------------------------------------------------|------------------------------------------------------------------------------------------------------------------------------------------------------------------------------------------------------------------------------------------------------------------------------------------------------------|
| <b>OXA</b><br><b>CGA 51202</b>                                                       | Ames: negative (-ve)<br><i>In vitro</i> gene mutation (GM): -ve<br><i>In vivo</i> micronucleus (MN): -ve<br>Unlikely to be genotoxic | Oral absorption >75%, excreted unchanged (dog)<br>Rat oral LD <sub>50</sub> > 2000<br>Rat dermal LD <sub>50</sub> > 1333<br>Eye irritant, Skin sensitiser<br>90-d rat NOAEL 62<br>90-d dog NOAEL 50<br>Rat dev: no teratogenic effect<br>- maternal NOAEL 100<br>- dev NOAEL 1000                          |
| <b>ESA</b><br><b>CGA354743*</b><br><b>and ESA S-enantiomer</b><br><b>(CGA376944)</b> | Ames: -ve<br><i>In vitro</i> GM: equivocal<br><i>In vivo</i> MN: equivocal (data gap)                                                | Oral absorption 2-4%, eliminated unchanged (ESA S-enantiomer)<br>Rat oral LD <sub>50</sub> > 2000<br>Rat dermal LD <sub>50</sub> > 1333<br>Non irritant (eye/skin)<br>Skin sensitisation: equivocal<br>90-d rat NOAEL 461<br>90-d dog NOAEL 200<br>Rat dev: no teratogenic effect, maternal/dev NOAEL 1000 |
| <b>NOA413173*</b>                                                                    | Ames: -ve<br><i>In vitro</i> GM: -ve<br><i>In vitro</i> CA: equivocal<br>Aneugenicity not investigated (data gap)                    | Rat oral LD <sub>50</sub> > 2000<br>28-day rat NOAEL 1370<br>90-day rat NOAEL 444                                                                                                                                                                                                                          |
| <b>CGA368208</b>                                                                     | Ames: -ve<br><i>In vitro</i> GM: -ve                                                                                                 | Rat oral LD <sub>50</sub> > 2000                                                                                                                                                                                                                                                                           |

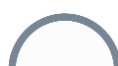

|                                               |                                                                                                                                               |                                                                                  |
|-----------------------------------------------|-----------------------------------------------------------------------------------------------------------------------------------------------|----------------------------------------------------------------------------------|
|                                               | <i>In vitro</i> CA: -ve<br>Aneugenicity not investigated (data gap)                                                                           | 28-d rat NOAEL 1261 (CGA369873)                                                  |
| <b>CGA50720</b>                               | Ames: -ve<br><i>In vitro</i> GM: -ve<br><i>In vitro</i> CA: positive (+ve)<br><i>In vivo</i> MN: -ve<br>Unlikely to be genotoxic              | Rat oral LD <sub>50</sub> > 2000<br>Insufficient data/information                |
| <b>CGA357704</b>                              | Ames: -ve<br><i>In vitro</i> GM: -ve<br><i>In vitro</i> CA: equivocal<br><i>In vivo</i> MN: -ve<br>Unlikely to be genotoxic                   | Rat oral LD <sub>50</sub> > 2000<br>Read-across from CGA51202 not accepted       |
| <b>SYN548164 (ammonium salt of SYN542491)</b> | Ames: -ve (164)<br><i>In vitro</i> GM: -ve (164)<br><i>In vitro</i> CA: +ve (164)<br><i>In vivo</i> MN: -ve (164)<br>Unlikely to be genotoxic | Read-across from CGA51202 not accepted                                           |
| <b>CGA50267</b>                               | Ames: -ve<br><i>In vitro</i> GM: -ve<br><i>In vitro</i> CA: +ve<br><i>In vivo</i> MN: -ve<br>Unlikely to be genotoxic                         | Rat oral LD <sub>50</sub> > 2000<br>Insufficient data/information                |
| <b>NOA436611 SYN546829</b>                    | Ames: -ve (NOA)<br><i>In vitro</i> GM: -ve (SYN)<br><i>In vitro</i> CA: -ve (SYN)<br>Aneugenicity not investigated (data gap)                 | Rat oral LD <sub>50</sub> > 2000 (NOA)<br>Read-across from CGA51202 not accepted |
| <b>SYN548163 (SYN542489)</b>                  | Ames: -ve (163)<br><i>In vitro</i> GM: -ve (163)<br><i>In vitro</i> CA: -ve (163)<br>Aneugenicity not investigated (data gap)                 | Read-across from CGA51202 not accepted<br>Structural alert for carcinogenicity   |
| <b>SYN542492</b>                              | Ames: -ve<br><i>In vitro</i> GM: -ve<br><i>In vitro</i> CA: +ve<br><i>In vivo</i> MN: -ve<br>Unlikely to be genotoxic                         | Read-across from CGA51202 not accepted                                           |
| <b>SYN542488</b>                              | Ames: -ve<br><i>In vitro</i> GM: equivocal<br><i>In vitro</i> CA: +ve<br><i>In vivo</i> MN: -ve<br>(data gap mutagenicity)                    | Read-across from CGA51202 not accepted                                           |
| <b>SYN548165 (SYN542607)</b>                  | Ames: -ve (165)<br><i>In vitro</i> GM: -ve (165)<br><i>In vitro</i> CA: -ve (165)<br>Aneugenicity not investigated (data gap)                 | Read-across from CGA354743 not accepted                                          |

|                                 |                                                                                                                        |                                                                              |
|---------------------------------|------------------------------------------------------------------------------------------------------------------------|------------------------------------------------------------------------------|
| <b>SYN542490</b>                | Read-across from CGA542607 not accepted (data gap)                                                                     | Read-across from CGA 542607 not accepted                                     |
| <b>SYN547969</b>                | Read-across from SYN542488 not accepted (data gap)                                                                     | Read-across from CGA51202 not accepted                                       |
| <b>CGA37735</b>                 | Read-across from CGA368208 not accepted (data gap)                                                                     | Read-across from CGA368208 not accepted                                      |
| <b>CGA37913</b>                 | No data (data gap)                                                                                                     | Rat oral LD <sub>50</sub> > 2000<br>Hydroxyl amines of toxicological concern |
| <b>CGA41507</b>                 | Ames: -ve<br><i>In vitro</i> GM: -ve<br><i>In vitro</i> CA: +ve<br><i>In vivo</i> MN: -ve<br>Unlikely to be genotoxic  | No data                                                                      |
| <b>CGA369873</b>                | Ames: -ve<br><i>In vitro</i> gene mutation: -ve<br><i>In vitro</i> CA: -ve<br>Aneugenicity not investigated (data gap) | 28-d rat NOAEL = 1261                                                        |
| <b>Impurity 3</b><br>(CGA13656) | Clastogenicity: positive <i>in vitro</i> , equivocal <i>in vivo</i>                                                    | -                                                                            |
| <b>Impurity 6</b><br>(CGA50259) | Gene mutation: positive <i>in vitro</i> , equivocal <i>in vivo</i>                                                     | -                                                                            |

\* It was noted during the MS written procedure on the draft conclusion that new genotoxicity studies are available and have been submitted for national assessment in France. Based on a national assessment of these additional studies, it was concluded that both metabolites are unlikely to be genotoxic (see EFSA, 2023).

### Medical data (Regulation (EU) N° 283/2013, Annex Part A, point 5.9)

no detrimental effects on health in manufacturing personnel reported; health incidences in occupational, accidental or intentional exposure cases (severity ranging from none/minor up to fatal outcome)

### Summary (Regulation (EU) N° 1107/2009, Annex II, point 3.1 and 3.6)

|                                                  | Value<br>(mg/kg bw (per day)) | Study                                 | Uncertainty factor |
|--------------------------------------------------|-------------------------------|---------------------------------------|--------------------|
| Acceptable Daily Intake (ADI)                    | 0.03                          | dog, 6-month                          | 100                |
| Acute Reference Dose (ARfD)                      | 0.5                           | rat, developmental (maternal effects) | 100                |
| Acceptable Operator Exposure Level (AOEL)        | 0.03                          | dog, 6-month                          | 100**              |
| Acute Acceptable Operator Exposure Level (AAOEL) | 0.5                           | rat, developmental (maternal effects) | 100**              |



\*\*correction for limited oral absorption/bioavailability not necessary.

From the first peer review for S-metolachlor (European Commission, 2004): ADI 0.1 mg/kg bw per day based on the 1-year dog study (UF 100), ARfD considered not necessary, AOEL 0.15 mg/kg bw per day based on the 90-day dog study (UF 100).

### Dermal absorption (Regulation (EU) N° 284/2013, Annex Part A, point 7.3)

|                           |                                                      |                     |                    |
|---------------------------|------------------------------------------------------|---------------------|--------------------|
| S-Metolachlor EC (A9396G) | <i>In vitro</i> dermal absorption study (human skin) |                     |                    |
|                           | Tested concentration                                 | Value (EFSA, 2012)* | Value (EFSA, 2017) |
|                           | Concentrate                                          | 0.4%                | 0.3%               |
|                           | Spray dilution 1:100                                 | 12%                 | 15%                |
|                           | Spray dilution 1:200                                 | 8%                  | 12%                |
|                           | Spray dilution 1:400                                 | 13%                 | 16%                |

\*applicable at the time of the dossier submission

### Exposure scenarios (Regulation (EU) N° 284/2013, Annex Part A, point 7.2)

|           |                                                                                                                                       |                |                 |                    |                     |
|-----------|---------------------------------------------------------------------------------------------------------------------------------------|----------------|-----------------|--------------------|---------------------|
| Operators | <u>Use:</u> maize and sunflower, tractor mounted equipment, application rate 1x 1.44 kg a.s./ha                                       |                |                 |                    |                     |
|           | Models:                                                                                                                               | German (%AOEL) | UK POEM (%AOEL) | EFSA 2014* (%AOEL) | EFSA 2014* (%AAOEL) |
|           | No PPE (workwear)                                                                                                                     | 379            | 2217            | 112                | 31                  |
|           | Gloves (ML and A**)<br>Coverall and sturdy footwear***                                                                                | 95             | 363             | 9                  | 4                   |
|           | *not applicable at the time of the dossier submission<br>**ML and A: during mixing/loading and application<br>***only in German model |                |                 |                    |                     |
|           | <u>Use:</u> maize and sunflower, tractor mounted equipment, application rate 1x 1.248 kg a.s./ha                                      |                |                 |                    |                     |
|           | Models:                                                                                                                               | German (%AOEL) | UK POEM (%AOEL) | EFSA 2014* (%AOEL) | EFSA 2014* (%AAOEL) |
|           | No PPE (workwear)                                                                                                                     | 329            | 1921            | 98                 | 28                  |
|           | Gloves (ML and A**)<br>Coverall and sturdy footwear***                                                                                | 82             | 314             | 8                  | 4                   |
|           | *not applicable at the time of the dossier submission<br>**ML and A: during mixing/loading and application<br>***only in German model |                |                 |                    |                     |

|         |                                                                                                                                                             |                                                |                                                   |
|---------|-------------------------------------------------------------------------------------------------------------------------------------------------------------|------------------------------------------------|---------------------------------------------------|
| Workers | <u>Use:</u> maize and sunflower, tractor mounted equipment, application rate 1x 1.44 kg a.s./ha<br>Re-entry task: inspection (2 h/day)<br>Model: EFSA, 2014 |                                                |                                                   |
|         | Exposure estimates (%AOEL)                                                                                                                                  | Default DFR (3 µg/cm <sup>2</sup> /kg a.s./ha) | Refined DFR (2.43 µg/cm <sup>2</sup> /kg a.s./ha) |
|         | Potential exposure                                                                                                                                          | 780                                            | 632                                               |



|                                                                                                                                                               |                                                   |                                                      |
|---------------------------------------------------------------------------------------------------------------------------------------------------------------|---------------------------------------------------|------------------------------------------------------|
| With workwear                                                                                                                                                 | 88                                                | 71                                                   |
| <u>Use</u> : maize and sunflower, tractor mounted equipment, application rate 1x 1.248 kg a.s./ha<br>Re-entry task: inspection (2 h/day)<br>Model: EFSA, 2014 |                                                   |                                                      |
| Exposure estimates (%AOEL)                                                                                                                                    | Default DFR<br>(3 µg/cm <sup>2</sup> /kg a.s./ha) | Refined DFR<br>(2.43 µg/cm <sup>2</sup> /kg a.s./ha) |
| Potential exposure                                                                                                                                            | 676                                               | 548                                                  |
| With workwear                                                                                                                                                 | 76                                                | 61                                                   |

Bystanders and residents

|                                                                                                                                                                       |       |        |          |          |       |
|-----------------------------------------------------------------------------------------------------------------------------------------------------------------------|-------|--------|----------|----------|-------|
| <u>Use</u> : maize and sunflower, tractor mounted equipment, application rate 1x 1.44 kg a.s./ha<br>EFSA, 2014: <b>no risk mitigation measure</b> (buffer strip 2-3m) |       |        |          |          |       |
| Exposure pathway:                                                                                                                                                     | Drift | Vapour | Deposits | Re-entry | Sum   |
| Resident (%AOEL)                                                                                                                                                      |       |        |          |          |       |
| - child                                                                                                                                                               | 84.2  | 3.6    | 13.0     | 105.3    | 143.5 |
| - adult                                                                                                                                                               | 20.1  | <1     | 4.3      | 58.5     | 60.1  |
| Bystander (%AAOEL)                                                                                                                                                    |       |        |          |          |       |
| - child                                                                                                                                                               | 11.5  | <1     | 2.3      | 6.3      | -     |
| - adult                                                                                                                                                               | 3.1   | <1     | <1       | 3.5      | -     |
| EFSA, 2014: <b>refined DFR</b> value of 2.43 µg/cm <sup>2</sup> /kg a.s./ha based on field study (Kennedy, 2019)                                                      |       |        |          |          |       |
| Exposure pathway:                                                                                                                                                     | Drift | Vapour | Deposits | Re-entry | Sum   |
| Resident (%AOEL)                                                                                                                                                      |       |        |          |          |       |
| - child                                                                                                                                                               | 84.2  | 3.6    | 13.0     | 85.3     | 127.5 |
| - adult                                                                                                                                                               | 20.1  | <1     | 4.3      | 47.4     | 51.2  |
| Bystander (%AAOEL)                                                                                                                                                    |       |        |          |          |       |
| - child                                                                                                                                                               | 11.5  | <1     | 2.3      | 5.1      | -     |
| - adult                                                                                                                                                               | 3.1   | <1     | <1       | 2.8      | -     |
| EFSA, 2014: <b>refined DFR</b> value of 2.43 + <b>buffer strip 10m</b>                                                                                                |       |        |          |          |       |
| Exposure pathway:                                                                                                                                                     | Drift | Vapour | Deposits | Re-entry | Sum   |
| Resident (%AOEL)                                                                                                                                                      |       |        |          |          |       |
| - child                                                                                                                                                               | 46.3  | 3.6    | 3.0      | 85.3     | 99.7  |
| - adult                                                                                                                                                               | 8.7   | <1     | <1       | 47.4     | 44.0  |
| Bystander (%AAOEL)                                                                                                                                                    |       |        |          |          |       |
| - child                                                                                                                                                               | 6.1   | <1     | <1       | 5.1      | -     |
| - adult                                                                                                                                                               | 1.2   | <1     | <1       | 2.8      | -     |
| EFSA, 2014: <b>refined DFR</b> value of 2.43 + <b>drift-reducing nozzles</b>                                                                                          |       |        |          |          |       |
| Exposure pathway:                                                                                                                                                     | Drift | Vapour | Deposits | Re-entry | Sum   |
| Resident (%AOEL)                                                                                                                                                      |       |        |          |          |       |
| - child                                                                                                                                                               | 42.1  | 3.6    | 6.5      | 85.3     | 99.6  |
| - adult                                                                                                                                                               | 10.0  | <1     | 2.1      | 47.4     | 44.9  |

|                                                                              |                                                                                                                                                                       |        |          |          |          |      |
|------------------------------------------------------------------------------|-----------------------------------------------------------------------------------------------------------------------------------------------------------------------|--------|----------|----------|----------|------|
| Bystanders and residents                                                     | Bystander (%AAOEL)                                                                                                                                                    |        |          |          |          |      |
|                                                                              | - child                                                                                                                                                               | 5.8    | <1       | 1.1      | 5.1      | -    |
|                                                                              | - adult                                                                                                                                                               | 1.6    | <1       | <1       | 2.8      | -    |
|                                                                              | <u>Use: maize and sunflower, tractor mounted equipment, application rate 1x 1.248 kg a.s./ha</u><br>EFSA, 2014: <b>no risk mitigation measure</b> (buffer strip 2-3m) |        |          |          |          |      |
|                                                                              | Exposure pathway:                                                                                                                                                     | Drift  | Vapour   | Deposits | Re-entry | Sum  |
|                                                                              | Resident (%AOEL)                                                                                                                                                      |        |          |          |          |      |
|                                                                              | - child                                                                                                                                                               | 73     | 3.6      | 11.3     | 91.3     | 125  |
|                                                                              | - adult                                                                                                                                                               | 17.4   | <1       | 3.7      | 50.7     | 52.2 |
|                                                                              | Bystander (%AAOEL)                                                                                                                                                    |        |          |          |          |      |
|                                                                              | - child                                                                                                                                                               | 10.0   | <1       | 2.0      | 5.5      | -    |
|                                                                              | - adult                                                                                                                                                               | 2.7    | <1       | <1       | 3.0      | -    |
|                                                                              | EFSA, 2014: <b>refined DFR</b> value of 2.43 µg/cm <sup>2</sup> /kg a.s./ha based on field study (Kennedy, 2019)                                                      |        |          |          |          |      |
|                                                                              | Exposure pathway:                                                                                                                                                     | Drift  | Vapour   | Deposits | Re-entry | Sum  |
|                                                                              | Resident (%AOEL)                                                                                                                                                      |        |          |          |          |      |
|                                                                              | - child                                                                                                                                                               | 73.0   | 3.6      | 11.3     | 73.9     | 111  |
|                                                                              | - adult                                                                                                                                                               | 17.4   | <1       | 3.7      | 41.1     | 44.5 |
|                                                                              | Bystander (%AAOEL)                                                                                                                                                    |        |          |          |          |      |
| - child                                                                      | 10.0                                                                                                                                                                  | <1     | 2.0      | 4.4      | -        |      |
| - adult                                                                      | 2.7                                                                                                                                                                   | <1     | <1       | 2.5      | -        |      |
| EFSA, 2014: <b>refined DFR</b> value of 2.43 + <b>buffer strip 5m</b>        |                                                                                                                                                                       |        |          |          |          |      |
| Exposure pathway:                                                            | Drift                                                                                                                                                                 | Vapour | Deposits | Re-entry | Sum      |      |
| Resident (%AOEL)                                                             |                                                                                                                                                                       |        |          |          |          |      |
| - child                                                                      | 48.6                                                                                                                                                                  | 3.6    | 4.6      | 73.9     | 93.0     |      |
| - adult                                                                      | 8.8                                                                                                                                                                   | <1     | 1.5      | 41.1     | 39.3     |      |
| Bystander (%AAOEL)                                                           |                                                                                                                                                                       |        |          |          |          |      |
| - child                                                                      | 6.5                                                                                                                                                                   | <1     | <1       | 4.4      | -        |      |
| - adult                                                                      | 1.3                                                                                                                                                                   | <1     | <1       | 2.5      | -        |      |
| EFSA, 2014: <b>refined DFR</b> value of 2.43 + <b>buffer strip 10m</b>       |                                                                                                                                                                       |        |          |          |          |      |
| Exposure pathway:                                                            | Drift                                                                                                                                                                 | Vapour | Deposits | Re-entry | Sum      |      |
| Resident (%AOEL)                                                             |                                                                                                                                                                       |        |          |          |          |      |
| - child                                                                      | 40.1                                                                                                                                                                  | 3.6    | 2.6      | 73.9     | 86.9     |      |
| - adult                                                                      | 7.6                                                                                                                                                                   | <1     | 1.5      | 41.1     | 38.2     |      |
| Bystander (%AAOEL)                                                           |                                                                                                                                                                       |        |          |          |          |      |
| - child                                                                      | 5.3                                                                                                                                                                   | <1     | <1       | 4.4      | -        |      |
| - adult                                                                      | 1.1                                                                                                                                                                   | <1     | <1       | 2.5      | -        |      |
| EFSA, 2014: <b>refined DFR</b> value of 2.43 + <b>drift-reducing nozzles</b> |                                                                                                                                                                       |        |          |          |          |      |
| Exposure pathway:                                                            | Drift                                                                                                                                                                 | Vapour | Deposits | Re-entry | Sum      |      |

|                    |      |     |     |      |      |
|--------------------|------|-----|-----|------|------|
| Resident (%AOEL)   |      |     |     |      |      |
| - child            | 36.5 | 3.6 | 5.6 | 73.9 | 86.8 |
| - adult            | 8.7  | <1  | 1.8 | 41.1 | 39.0 |
| Bystander (%AAOEL) |      |     |     |      |      |
| - child            | 5.0  | <1  | 1.0 | 4.4  | -    |
| - adult            | 1.4  | <1  | <1  | 2.5  | -    |

**Classification with regard to toxicological data (Regulation (EU) N° 283/2013, Annex Part A, Section 10)**

Substance:

Harmonised classification according to Regulation (EC) No 1272/2008 and its Adaptations to Technical Process [Table 3.1 of Annex VI of Regulation (EC) No 1272/2008 as amended]<sup>2</sup> :

According to the Peer review, the criteria for classification may be met for:

|                                                                                                       |
|-------------------------------------------------------------------------------------------------------|
| S-metolachlor                                                                                         |
| Warning, Skin Sens. 1, H317: May cause an allergic skin reaction                                      |
| Note: there is a RAC Opinion (adopted on 2/06/2022) proposing:<br>Carc. 2; H351<br>Skin Sens. 1; H317 |
| As above                                                                                              |

<sup>2</sup> Regulation (EC) No 1272/2008 of the European Parliament and of the Council of 16 December 2008 on classification, labelling and packaging of substances and mixtures, amending and repealing Directives 67/548/EEC and 1999/45/EC, and amending Regulation (EC) No 1907/2006. OJ L 353, 31.12.2008, 1-1355.

**Residues in or on treated products food and feed****Metabolism in plants (Regulation (EU) N° 283/2013, Annex Part A, points 6.2.1, 6.5.1, 6.6.1 and 6.7.1)**

| <b>Primary crops</b><br>(Plant groups covered)<br><b>OECD Guideline 501</b>                                                                                                                                                                                                                                                                                                                                                                       | <b>Crop groups</b>   | <b>Crop(s)</b>                                                                 | <b>Application(s)</b>                                                                                                                                                  | <b>DAT (days)</b>                                                                                 |
|---------------------------------------------------------------------------------------------------------------------------------------------------------------------------------------------------------------------------------------------------------------------------------------------------------------------------------------------------------------------------------------------------------------------------------------------------|----------------------|--------------------------------------------------------------------------------|------------------------------------------------------------------------------------------------------------------------------------------------------------------------|---------------------------------------------------------------------------------------------------|
|                                                                                                                                                                                                                                                                                                                                                                                                                                                   | Fruit crops          | --                                                                             | --                                                                                                                                                                     | --                                                                                                |
|                                                                                                                                                                                                                                                                                                                                                                                                                                                   | Root crops           | Potato                                                                         | Soil (pre-emergence), F:<br>1x 2.24 kg as/ha (MOC)                                                                                                                     | Soil appl.:<br>25, 50, 100%<br>maturity                                                           |
|                                                                                                                                                                                                                                                                                                                                                                                                                                                   |                      |                                                                                | Soil (pre-emergence), G:<br>1x 3.36 kg as/ha (MOC)                                                                                                                     | Foliar appl.:<br>0, 7, 14, 21<br>and 74<br>(maturity)<br>(Foliage,<br>tubers)                     |
|                                                                                                                                                                                                                                                                                                                                                                                                                                                   |                      |                                                                                | Foliar (pre-emergence),<br>G: 1x 2.8 kg as/ha<br>(MOC)                                                                                                                 |                                                                                                   |
|                                                                                                                                                                                                                                                                                                                                                                                                                                                   |                      |                                                                                | Soil (pre-emergence): 1x<br>2.26 kg as/ha + Foliar<br>(post-emergence):<br>1.39 kg as/ha + partly<br>soil (drenching 66d after<br>planting): 1.59 kg as/ha,<br>G (MOC) | Foliage and<br>tubers:<br>66, 99 and<br>161<br>(maturity)                                         |
|                                                                                                                                                                                                                                                                                                                                                                                                                                                   | Leafy crops          | -                                                                              | -                                                                                                                                                                      | -                                                                                                 |
|                                                                                                                                                                                                                                                                                                                                                                                                                                                   | Cereals/grass crops  | Maize                                                                          | Foliar (early post-<br>emergence), F: 1x 1.44<br>kg as/ha – BBCH 13 (S-<br>MOC or MOC)                                                                                 | Plant: 30, 82<br>Stalks/Cobs/<br>grains: 153                                                      |
| Pulses/Oilseeds                                                                                                                                                                                                                                                                                                                                                                                                                                   | Soya bean            | Soil (pre-emergence), F:<br>1x 1.72 kg as/ha (S-<br>MOC)                       | Soil appl.:<br>19, 57, 75<br>(whole<br>plant/dried<br>hay) and 156<br>(stalk, beans)                                                                                   |                                                                                                   |
|                                                                                                                                                                                                                                                                                                                                                                                                                                                   |                      | Soil (pre-emergence), F:<br>1x 5.17 kg as/ha (S-<br>MOC)                       |                                                                                                                                                                        |                                                                                                   |
|                                                                                                                                                                                                                                                                                                                                                                                                                                                   |                      | Stem injection, F: 0.6 mg<br>as/plant in 10µL<br>dimethylsulfoxide (S-<br>MOC) | Stem inj.: 1,<br>75 (whole<br>plant) and 99<br>(stalk, beans)                                                                                                          |                                                                                                   |
| Miscellaneous                                                                                                                                                                                                                                                                                                                                                                                                                                     | --                   | --                                                                             | --                                                                                                                                                                     |                                                                                                   |
| Metabolism in plants was investigated with S-metolachlor (S-MOC) and metolachlor (MOC) uniformly <sup>14</sup> C-labelled in the phenyl ring. Metabolic pathways in all studies were found to be similar. The parent compound undergoes a rapid and extensive metabolism into mainly polar aqueous metabolites and it is either metabolised by glutathione conjugation or by oxidative reactions. A supplementary study in lettuce was available. |                      |                                                                                |                                                                                                                                                                        |                                                                                                   |
| <b>Rotational crops</b><br>(metabolic pattern)<br><b>OECD Guideline 502</b>                                                                                                                                                                                                                                                                                                                                                                       | <b>Crop groups</b>   | <b>Crop(s)</b>                                                                 | <b>PBI (days)</b>                                                                                                                                                      | <b>Comments</b>                                                                                   |
|                                                                                                                                                                                                                                                                                                                                                                                                                                                   | Root/tuber crops     | Radish                                                                         | 30, 120, 364                                                                                                                                                           | Bare soil application of<br>phenyl labelled <sup>14</sup> C-S-<br>metolachlor at<br>1.63 kg as/ha |
|                                                                                                                                                                                                                                                                                                                                                                                                                                                   | Leafy crops          | Lettuce                                                                        | 30,120, 364                                                                                                                                                            |                                                                                                   |
|                                                                                                                                                                                                                                                                                                                                                                                                                                                   | Cereal (small grain) | Spring<br>wheat<br>(forage,<br>grain,<br>fodder)                               | 30,120, 364                                                                                                                                                            |                                                                                                   |

|                                                                                                     |                                                                                                                                                                                                                                                                                                                                                                                                                                                                                                                                                                                                                                                                                                    |     |    |    |    |
|-----------------------------------------------------------------------------------------------------|----------------------------------------------------------------------------------------------------------------------------------------------------------------------------------------------------------------------------------------------------------------------------------------------------------------------------------------------------------------------------------------------------------------------------------------------------------------------------------------------------------------------------------------------------------------------------------------------------------------------------------------------------------------------------------------------------|-----|----|----|----|
|                                                                                                     | Winter wheat (forage, grain, fodder)                                                                                                                                                                                                                                                                                                                                                                                                                                                                                                                                                                                                                                                               | 174 |    |    |    |
|                                                                                                     | Other                                                                                                                                                                                                                                                                                                                                                                                                                                                                                                                                                                                                                                                                                              | --  | -- |    |    |
| Rotational crop and primary crop metabolism similar?                                                | <p>Yes. Unchanged parent was only detected in minor amounts in lettuce (0.001 mg/kg) at 30d PBI. Residues mainly consisted of a large range of small fractions, none of them exceeding 0.01 mg/kg in any of the edible crop parts, except metabolite CGA133275, free and its glucose and malonyl-glucose conjugated forms that were predominant in the feed items (wheat forage, wheat fodder at maturity (straw and husks) and in radish tops).</p> <p>The rest of the residue was associated with natural components, with glucose conjugates being the most predominant ones.</p> <p>It was not demonstrated that all persistent soil metabolites were adequately addressed in the studies.</p> |     |    |    |    |
| <b>Processed commodities</b><br>(standard hydrolysis study)<br><b>OECD Guideline 507</b>            | <b>Conditions</b>                                                                                                                                                                                                                                                                                                                                                                                                                                                                                                                                                                                                                                                                                  |     |    |    |    |
|                                                                                                     | 20 min, 90 °C, pH 4                                                                                                                                                                                                                                                                                                                                                                                                                                                                                                                                                                                                                                                                                | --  | -- | -- | -- |
|                                                                                                     | 60 min, 100 °C, pH 5                                                                                                                                                                                                                                                                                                                                                                                                                                                                                                                                                                                                                                                                               | --  | -- | -- | -- |
|                                                                                                     | 20 min, 120 °C, pH 6                                                                                                                                                                                                                                                                                                                                                                                                                                                                                                                                                                                                                                                                               | --  | -- | -- | -- |
| Residue pattern in processed commodities similar to residue pattern in raw commodities?             | <p>Not applicable. No processing studies were available, and none are necessary since residues of S-metolachlor in treated maize grain and sunflower seeds are below the LOQ of 0.01 mg/kg.</p>                                                                                                                                                                                                                                                                                                                                                                                                                                                                                                    |     |    |    |    |
| Plant residue definition for monitoring (RD-Mo)<br><b>OECD Guidance, series on pesticides No 31</b> | <p>Primary crops: “Metolachlor including other mixtures of constituent isomers including S-metolachlor (sum of isomers)” for all crop groups</p> <p>Rotational crops: “Metolachlor including other mixtures of constituent isomers including S-metolachlor (sum of isomers)”</p>                                                                                                                                                                                                                                                                                                                                                                                                                   |     |    |    |    |



Plant residue definition for risk assessment (RD-RA)

Primary crops: “Metolachlor including other mixtures of constituent isomers including S-metolachlor (sum of isomers)”  
 Rotational crops: “Metolachlor including other mixtures of constituent isomers including S-metolachlor (sum of isomers)” – **Provisional**  
**Data gap:** Sufficient<sup>3</sup> rotational crops field trials in NEU and SEU analysing for CGA133275, free and conjugated in food and feed edible parts of the rotational crops with a validated analytical method including a hydrolysis step to release the conjugates of CGA133275. In the absence of further evidence persistent soil metabolites are addressed by the rotational crops metabolism study, metabolites OXA [CGA51202], ESA [CGA354743], CGA40172, CGA 368208, NOA436611 and CGA 357704 will need also to be quantified in the rotational crops field trials. The genotoxicity potential of CGA133275, ESA [CGA354743], CGA 368208, NOA436611 may need to be addressed.

Conversion factor (monitoring to risk assessment)

Pending finalisation of RD-RA

**Metabolism in livestock (Regulation (EU) N° 283/2013, Annex Part A, points 6.2.2, 6.2.3, 6.2.4, 6.2.5 6.7.1)**

| OECD Guideline 503 and SANCO/11187/2013 rev. 3 (fish)                | Animal                                                                                                                                                                                                                                                                           | Dose (mg/kg bw/d) | Duration (days) | N rate/comment                                                                                                                                                                                                          |
|----------------------------------------------------------------------|----------------------------------------------------------------------------------------------------------------------------------------------------------------------------------------------------------------------------------------------------------------------------------|-------------------|-----------------|-------------------------------------------------------------------------------------------------------------------------------------------------------------------------------------------------------------------------|
| <b>Animals covered</b>                                               | Laying hen                                                                                                                                                                                                                                                                       | 7.2               | 4               | The dietary burden was calculated considering only the S-metolachlor residue levels in maize and sunflower feed items and by-products. The poultry and ruminant metabolism studies were highly overdosed (>1000 N rate) |
|                                                                      | Goat/Cow                                                                                                                                                                                                                                                                         | 3.85              | 4               |                                                                                                                                                                                                                         |
|                                                                      | Pig                                                                                                                                                                                                                                                                              | --                | --              | Not necessary                                                                                                                                                                                                           |
|                                                                      | Fish                                                                                                                                                                                                                                                                             | --                | --              | Not necessary                                                                                                                                                                                                           |
|                                                                      | The metabolism studies indicated an extensive degradation of the parent compound. A large number of metabolites were formed reflecting two main degradation pathways: glutathione conjugation with subsequent degradation of the glutathionyl moiety and/or oxidative reactions. |                   |                 |                                                                                                                                                                                                                         |
| Time needed to reach a plateau concentration in milk and eggs (days) | Eggs: no plateau reached (increasing residues over 4 study days)<br>Milk: 2 days                                                                                                                                                                                                 |                   |                 |                                                                                                                                                                                                                         |

<sup>3</sup> By “sufficient rotational crops field trials” it is understood limited field studies (at two sites in major growing areas on three representative crops, including a root crop) or extended field trials, as appropriate, in case the limited set of studies show residues above 0.01 mg/kg)

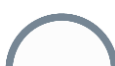

|                                                                                                      |                                                                                                                                                                                                                                                                                                                                                                                                           |
|------------------------------------------------------------------------------------------------------|-----------------------------------------------------------------------------------------------------------------------------------------------------------------------------------------------------------------------------------------------------------------------------------------------------------------------------------------------------------------------------------------------------------|
| Animal residue definition for monitoring (RD-Mo)<br><b>OECD Guidance, series on pesticides No 31</b> | “Metolachlor including other mixtures of constituent isomers including S-metolachlor (sum of isomers)” – Provisional – Pending outcome of the identified data gap <sup>(1)</sup> and potential carry-over of CGA 133275, free and conjugated from feed items of rotational crops to animal matrices to be assessed.                                                                                       |
| Animal residue definition for risk assessment (RD-RA)                                                | “Metolachlor including other mixtures of constituent isomers including S-metolachlor (sum of isomers)” - Provisional – Pending outcome of the identified data gap <sup>(1)</sup> and potential carry-over of CGA 133275, free and conjugated from feed items of rotational crops to animal matrices to be assessed.                                                                                       |
| Conversion factor (monitoring to risk assessment)                                                    | Pending finalisation of RD-RA                                                                                                                                                                                                                                                                                                                                                                             |
| Metabolism in rat and ruminant similar (Yes/No)                                                      | Yes                                                                                                                                                                                                                                                                                                                                                                                                       |
| Fat soluble residues (Yes/No)<br><b>(FAO, 2009)</b>                                                  | From the poultry and ruminant metabolism data, S-metolachlor residues were found in low levels in egg white and yolk (up to 2% TRR and 0.002 mg/kg). In fat, the residue levels accounted for up to 6% TRR and 0.02 mg/kg whilst these were not detected in fat free muscle. Also considering the log $P_{ow}$ of 3.05, there is indication that S-metolachlor residues can be considered as fat soluble. |

### Residues in succeeding crops (Regulation (EU) N° 283/2013, Annex Part A, point 6.6.2)

|                                                                                             |                                                                                                                                                                                                                                                                                                                                                                                                                                                                                                                                                                                                                                                                                                                                            |
|---------------------------------------------------------------------------------------------|--------------------------------------------------------------------------------------------------------------------------------------------------------------------------------------------------------------------------------------------------------------------------------------------------------------------------------------------------------------------------------------------------------------------------------------------------------------------------------------------------------------------------------------------------------------------------------------------------------------------------------------------------------------------------------------------------------------------------------------------|
| <b>Confined rotational crop study</b><br>(Quantitative aspect)<br><b>OECD Guideline 502</b> | The uptake of radioactivity was most dominant at a PBI of 120d in wheat fodder and radish tops (0.78 and 0.23 mg/kg, respectively). S-metolachlor was only detected in lettuce (1% TRR; 0.001 mg/kg) at the 30d PBI. Residue levels of S-metolachlor above the LOQ (0.01 mg/kg) are therefore not expected in rotational crops. The residue mainly consisted of a large range of small fractions, none of them exceeding 0.01 mg/kg in edible crop parts, except for metabolite CGA133275, free and its glucose and malonyl-glucose conjugated forms that were predominant in wheat forage (up to 40% TRR), in wheat, fodder at maturity (straw and husks) (up to 32.7% TRR) and in radish tops (up to 19.3% TRR) at 120 and 365 day-PBIs. |
| <b>Field rotational crop study</b><br><b>OECD Guideline 504</b>                             | See data gap <sup>(1)</sup>                                                                                                                                                                                                                                                                                                                                                                                                                                                                                                                                                                                                                                                                                                                |



**Stability of residues (Regulation (EU) N° 283/2013, Annex Part A, point 6.1)  
OECD Guideline 506**

| Plant products (Category)                                                                                                                                                | Commodity         | T (°C) | Stability (Month/Year)       |           |    |    |
|--------------------------------------------------------------------------------------------------------------------------------------------------------------------------|-------------------|--------|------------------------------|-----------|----|----|
|                                                                                                                                                                          |                   |        | S-Metolachlor                | CGA133275 |    |    |
| High water content                                                                                                                                                       | Maize forage      | -18    | 24                           | --        |    |    |
|                                                                                                                                                                          | Maize whole plant | -18    | 13<br>(interim report)       | --        |    |    |
|                                                                                                                                                                          | Lettuce           | -18    | --                           | 23        |    |    |
| High oil content                                                                                                                                                         | Soya bean         | -18    | 24                           | --        |    |    |
|                                                                                                                                                                          | Sunflower seeds   | -18    | --<br>13<br>(interim report) | 23        |    |    |
| High protein content                                                                                                                                                     | Dry beans         | -18    | 24                           | 23        |    |    |
| High starch content                                                                                                                                                      | Potato            | -18    | 24                           | --        |    |    |
|                                                                                                                                                                          | Maize grain       | -18    | 24                           | --        |    |    |
|                                                                                                                                                                          | Maize grain       | -18    | 13<br>(interim report)       | --        |    |    |
|                                                                                                                                                                          | Wheat grain       | -18    | --                           | 23        |    |    |
| High acid content                                                                                                                                                        | Strawberries      | -18    | --                           | 23        |    |    |
|                                                                                                                                                                          | Oranges           | -18    | 24                           | --        |    |    |
| Residues of S-metolachlor are stable at -18 °C for at least two years in commodities with high starch-, high water-, high oil-, high protein- and high acid- content.    |                   |        |                              |           |    |    |
| Residues of CGA133275 are stable in high water-, high starch-, high oil-, high protein- and high acid- content commodities when stored at -18 °C for at least 23 months. |                   |        |                              |           |    |    |
| Animal                                                                                                                                                                   | Animal commodity  | T (°C) | Stability (Month/Year)       |           |    |    |
| --                                                                                                                                                                       | Muscle            | --     | --                           | --        | -- | -- |
| --                                                                                                                                                                       | Liver             | --     | --                           | --        | -- | -- |
| --                                                                                                                                                                       | Kidney            | --     | --                           | --        | -- | -- |
| --                                                                                                                                                                       | Milk              | --     | --                           | --        | -- | -- |
| --                                                                                                                                                                       | Egg               | --     | --                           | --        | -- | -- |
| No study available/not required pending upon the outcome of the identified data gap <sup>(1)</sup> .                                                                     |                   |        |                              |           |    |    |

**Summary of residues data from the supervised residue trials (Regulation (EU) N° 283/2013, Annex Part A, point 6.3) OECD Guideline 509, OECD Guidance, series on pesticides No 66 and OECD MRL calculator**

| Crop                                                                                                                                                                                                                                                                             | Region/<br>Indoor<br>(a) | Residue levels (mg/kg) observed in the supervised<br>residue trials relevant to the supported GAPs<br>(b)               | Recommendations/comments<br>(OECD calculations) | MRL<br>proposals<br>(mg/kg) | HR<br>(mg/kg)<br>(c) | STMR<br>(mg/kg)<br>(d) |
|----------------------------------------------------------------------------------------------------------------------------------------------------------------------------------------------------------------------------------------------------------------------------------|--------------------------|-------------------------------------------------------------------------------------------------------------------------|-------------------------------------------------|-----------------------------|----------------------|------------------------|
| <b>Representative uses</b>                                                                                                                                                                                                                                                       |                          |                                                                                                                         |                                                 |                             |                      |                        |
| <b>RD-Mo/RD-RA:</b> “Metolachlor including other mixtures of constituent isomers including S-metolachlor (sum of isomers)”                                                                                                                                                       |                          |                                                                                                                         |                                                 |                             |                      |                        |
| Sunflower seeds                                                                                                                                                                                                                                                                  | NEU/outdoor              | 4x <0.01                                                                                                                | Data set is sufficient for the intended uses.   | 0.01*                       | 0.01                 | 0.01                   |
|                                                                                                                                                                                                                                                                                  | SEU/outdoor              | 4x <0.01                                                                                                                | Data set is sufficient for the intended uses.   | 0.01*                       | 0.01                 | 0.01                   |
| Maize                                                                                                                                                                                                                                                                            | NEU/outdoor              | Grain: 4x <0.01<br>Whole plant (forage): 4x <0.01<br>Whole plant (silage): 4x <0.01<br>Rest of plant (stover): 4x <0.01 | Data set is sufficient for the intended uses.   | 0.01*<br>n/a<br>n/a<br>n/a  | 0.01                 | 0.01                   |
|                                                                                                                                                                                                                                                                                  | SEU/outdoor              | Grain: 4x <0.01<br>Whole plant (forage): 4x <0.01<br>Whole plant (silage): 4x <0.01<br>Rest of plant (stover): 4x <0.01 | Data set is sufficient for the intended uses.   | 0.01*<br>n/a<br>n/a<br>n/a  | 0.01                 | 0.01                   |
| <b>Summary of the data on formulation equivalence OECD Guideline 509</b>                                                                                                                                                                                                         |                          |                                                                                                                         |                                                 |                             |                      |                        |
| Crop                                                                                                                                                                                                                                                                             | Region                   | Residue data (mg/kg)                                                                                                    | Recommendations/comments                        |                             |                      |                        |
| Sunflower seeds                                                                                                                                                                                                                                                                  | NEU/SEU<br>outdoor       | Not required.                                                                                                           | Representative EC formulation.                  |                             |                      |                        |
| Maize                                                                                                                                                                                                                                                                            |                          |                                                                                                                         |                                                 |                             |                      |                        |
| <b>Summary of data on residues in pollen and bee products (Regulation (EU) No 283/2013, Annex Part A, point 6.10.1)</b>                                                                                                                                                          |                          |                                                                                                                         |                                                 |                             |                      |                        |
| The data requirement to determine the residues in pollen and bee products for human consumption resulting from residues taken up by honeybees from crops at blossom is not fulfilled pending upon the magnitude of residues of CGA133275 and its conjugates in rotational crops. |                          |                                                                                                                         |                                                 |                             |                      |                        |
|                                                                                                                                                                                                                                                                                  |                          |                                                                                                                         |                                                 |                             |                      |                        |
| –                                                                                                                                                                                                                                                                                | –                        | –                                                                                                                       | –                                               | –                           | –                    | –                      |

- (a): **NEU** or **SEU** for northern or southern **outdoor** trials in EU member states (**N+SEU** if both zones), **Indoor** for glasshouse/protected crops, **Country** if non-EU location.
- (b): Residue levels in trials conducted according to GAP reported in ascending order (e.g. 3x <0.01, 0.01, 6x 0.02, 0.04, 0.08, 3x 0.10, 2x 0.15, 0.17). When residue definition for monitoring and risk assessment differs, use **Mo/RA** to differentiate data expressed according to the residue definition for **Monitoring and Risk Assessment**.
- (c): **HR**: Highest residue. When residue definition for monitoring and risk assessment differs, HR according to residue definition for monitoring reported in brackets (HR<sub>Mo</sub>).
- (d): **STMR**: Supervised Trials Median Residue. When residue definition for monitoring and risk assessment differs, STMR according to definition for monitoring reported in brackets (STMR<sub>Mo</sub>).

**Inputs for animal burden calculations** – Provisional – Potential carry-over of the residues of CGA 133275, free and conjugated from the rotational crops to the animal commodities might need to be considered in the light of the outcome of the requested field trials analysing the magnitude of this compound in rotational crops and its toxicity. See also data gap<sup>(1)</sup>

| Feed commodity                                                                                                                                                                     | Median dietary burden |                                  | Maximum dietary burden   |                                  |
|------------------------------------------------------------------------------------------------------------------------------------------------------------------------------------|-----------------------|----------------------------------|--------------------------|----------------------------------|
|                                                                                                                                                                                    | (mg/kg)               | Comment                          | (mg/kg)                  | Comment                          |
| <b>Representative uses</b>                                                                                                                                                         |                       |                                  |                          |                                  |
| Risk assessment residue definition: “Metolachlor including other mixtures of constituent isomers including S-metolachlor (sum of isomers)” – Provisional – Data gap <sup>(1)</sup> |                       |                                  |                          |                                  |
| Corn field, Forage/silage                                                                                                                                                          | 0.01                  | STMR (=LOQ)                      | 0.01                     | HR (=LOQ)                        |
| Corn field, Stover                                                                                                                                                                 | 0.01                  | STMR (=LOQ)                      | 0.01                     | HR (=LOQ)                        |
| Corn pop, Stover                                                                                                                                                                   | 0.01                  | STMR (=LOQ)                      | 0.01                     | HR (=LOQ)                        |
| Corn field, Grain                                                                                                                                                                  | 0.01                  | STMR (=LOQ)                      | 0.01                     | STMR (=LOQ)                      |
| Corn pop, Grain                                                                                                                                                                    | 0.01                  | STMR (=LOQ)                      | 0.01                     | STMR (=LOQ)                      |
| Corn field, Milled by-products                                                                                                                                                     | 0.01                  | STMR (=LOQ)                      | 0.01                     | STMR (=LOQ)                      |
| Corn field, Hominy meal <sup>(2)</sup>                                                                                                                                             | 0.01                  | STMR (=LOQ) x default PF (6 1)   | 0.01                     | STMR (=LOQ) x default PF (6 1)   |
| Corn field, Gluten feed <sup>(2)</sup>                                                                                                                                             | 0.01                  | STMR (=LOQ) x default PF (2.5 1) | 0.01                     | STMR (=LOQ) x default PF (2.5 1) |
| Corn field, Gluten meal <sup>(2)</sup>                                                                                                                                             | 0.01                  | STMR (=LOQ)                      | 0.01                     | STMR (=LOQ)                      |
| Distiller’s grain, Dried <sup>(2)</sup>                                                                                                                                            | 0.01                  | STMR (=LOQ) x default PF (1)     | 0.01                     | STMR (=LOQ) x default PF (1)     |
| Sunflower Meal <sup>(2)</sup>                                                                                                                                                      | 0.01                  | STMR (=LOQ) x default PF (1)     | <del>0.012</del><br>0.01 | STMR (=LOQ) x default PF (1)     |
| <sup>(2)</sup> : In case residues in the RAC are below the LOQ, it is possible to waive the use of the default PF by the value of 1.                                               |                       |                                  |                          |                                  |

**Residues from livestock feeding studies (Regulation (EU) N° 283/2013, Annex Part A, points 6.4.1, 6.4.2, 6.4.3 and 6.4.4) – Provisional – See data gap<sup>(1)</sup>**  
**OECD Guideline 505 and OECD Guidance, series on pesticides No 73**

| MRL calculations                                                                       | Ruminant                                                              |                      |                                   |                      | Pig/Swine                         |                        | Poultry                           |                       | Fish                              |                      |
|----------------------------------------------------------------------------------------|-----------------------------------------------------------------------|----------------------|-----------------------------------|----------------------|-----------------------------------|------------------------|-----------------------------------|-----------------------|-----------------------------------|----------------------|
|                                                                                        | <b>Highest expected intake</b><br>(mg/kg bw/d)<br>(mg/kg DM for fish) | Beef cattle          | 0.0006                            | Ram/Ewe              | 0.0004                            | Breeding               | 0.0003                            | Broiler               | 0.001                             | Carp                 |
|                                                                                        | Dairy cattle                                                          | 0.0009               | Lamb                              | 0.0005               | Finishing                         | 0.0003                 | Layer                             | 0.001                 | Trout                             | --                   |
|                                                                                        |                                                                       |                      |                                   |                      |                                   |                        | Turkey                            | 0.001                 | Fish intake >0.1 mg/kg DM         |                      |
| Intake >0.004 mg/kg bw                                                                 | No                                                                    |                      | No                                |                      | No                                |                        | No                                |                       | No                                |                      |
| Feeding study submitted                                                                | A feeding study with dairy cattle is available <sup>(3)</sup>         |                      |                                   |                      |                                   |                        |                                   |                       |                                   |                      |
| <b>Representative feeding level</b> (mg/kg bw/d, mg/kg DM for fish) and <b>N rates</b> | Level                                                                 | Beef: N<br>Dairy: N  | Level                             | Lamb: N<br>Ewe: N    | Level                             | N rate<br>Breed/Finish | Level                             | B or T: N<br>Layer: N | Level                             | N rate<br>Carp/Trout |
|                                                                                        | Estimated HR <sup>(a)</sup> at 1N                                     | <b>MRL proposals</b> | Estimated HR <sup>(a)</sup> at 1N | <b>MRL proposals</b> | Estimated HR <sup>(a)</sup> at 1N | <b>MRL proposals</b>   | Estimated HR <sup>(a)</sup> at 1N | <b>MRL proposals</b>  | Estimated HR <sup>(a)</sup> at 1N | <b>MRL proposals</b> |
| Muscle                                                                                 |                                                                       | Open                 |                                   | Open                 |                                   | Open                   |                                   | Open                  |                                   | Open                 |
| Fat                                                                                    |                                                                       | Open                 |                                   | Open                 |                                   | Open                   |                                   | Open                  |                                   | Open                 |
| Meat <sup>(b)</sup>                                                                    |                                                                       |                      |                                   |                      |                                   |                        |                                   |                       |                                   |                      |
| Liver                                                                                  |                                                                       | Open                 |                                   | Open                 |                                   | Open                   |                                   | Open                  |                                   |                      |
| Kidney                                                                                 |                                                                       | Open                 |                                   | Open                 |                                   | Open                   |                                   | Open                  |                                   |                      |
| Milk <sup>(a)</sup>                                                                    |                                                                       | Open                 |                                   | Open                 |                                   |                        |                                   |                       |                                   |                      |
| Eggs                                                                                   |                                                                       |                      |                                   |                      |                                   |                        |                                   |                       |                                   |                      |
| Method of calculation <sup>(c)</sup>                                                   | It                                                                    |                      |                                   |                      |                                   |                        |                                   |                       |                                   |                      |

<sup>(a)</sup>: Estimated HR calculated at 1N level (**estimated mean level for milk**).

<sup>(b)</sup>: HR in meat calculated for mammalian on the basis of 20 % fat + 80 % muscle and 10 % fat + 90 % muscle for poultry

<sup>(c)</sup>: The OECD guidance document on residues in livestock (series on pesticides 73) recommends three different approaches to derive MRLs for animal products; by applying a transfer factor (Tf), by intrapolation (It) or by linear regression (Ln). Fill in method(s) considered to derive the MRL proposals.

<sup>(3)</sup>: Pending the outcome of the data gap<sup>(1)</sup> and potential carry-over of the residues of this compound from feed items to animal commodities, it cannot be concluded whether this feeding study can be representative of the actual exposure of the animals.

| STMR calculations                                                                      | Ruminant                                                             |                                     |                             |                                     | Pig/Swine                   |                                     | Poultry                     |                                     | Fish                        |                                     |
|----------------------------------------------------------------------------------------|----------------------------------------------------------------------|-------------------------------------|-----------------------------|-------------------------------------|-----------------------------|-------------------------------------|-----------------------------|-------------------------------------|-----------------------------|-------------------------------------|
|                                                                                        | <b>Median expected intake</b><br>(mg/kg bw/d)<br>(mg/kg DM for fish) | Beef cattle                         | 0.0006                      | Ram/Ewe                             | 0.0004                      | Breeding                            | 0.0003                      | Broiler                             | 0.001                       | Carp                                |
|                                                                                        | Dairy cattle                                                         | 0.0009                              | Lamb                        | 0.0005                              | Finishing                   | 0.0003                              | Layer                       | 0.001                               | Trout                       |                                     |
|                                                                                        |                                                                      |                                     |                             |                                     |                             |                                     | Turkey                      | 0.001                               |                             |                                     |
| <b>Representative feeding level</b> (mg/kg bw/d, mg/kg DM for fish) and <b>N rates</b> | Level                                                                | Beef: N<br>Dairy: N                 | Level                       | Lamb: N<br>Ewe: N                   | Level                       | N rate<br>Breed/Finish              | Level                       | B or T: N<br>Layer: N               | Level                       | N rate<br>Carp/Trout                |
|                                                                                        | Mean level in feeding level                                          | Estimated STMR <sup>(b)</sup> at 1N | Mean level in feeding level | Estimated STMR <sup>(b)</sup> at 1N | Mean level in feeding level | Estimated STMR <sup>(b)</sup> at 1N | Mean level in feeding level | Estimated STMR <sup>(b)</sup> at 1N | Mean level in feeding level | Estimated STMR <sup>(b)</sup> at 1N |
| Muscle                                                                                 |                                                                      |                                     |                             |                                     |                             |                                     |                             |                                     |                             |                                     |
| Fat                                                                                    |                                                                      |                                     |                             |                                     |                             |                                     |                             |                                     |                             |                                     |
| Meat <sup>(a)</sup>                                                                    |                                                                      |                                     |                             |                                     |                             |                                     |                             |                                     |                             |                                     |
| Liver                                                                                  |                                                                      |                                     |                             |                                     |                             |                                     |                             |                                     |                             |                                     |
| Kidney                                                                                 |                                                                      |                                     |                             |                                     |                             |                                     |                             |                                     |                             |                                     |
| Milk                                                                                   |                                                                      |                                     |                             |                                     |                             |                                     |                             |                                     |                             |                                     |
| Eggs                                                                                   |                                                                      |                                     |                             |                                     |                             |                                     |                             |                                     |                             |                                     |
| Method of calculation <sup>(c)</sup>                                                   | It                                                                   |                                     | It                          |                                     | It                          |                                     |                             |                                     |                             |                                     |

<sup>(a)</sup>: STMR in meat calculated for mammalian on the basis of 20 % fat + 80 % muscle and 10 % fat + 90 % muscle for poultry

<sup>(b)</sup>: When the mean level is set at the LOQ, the STMR is set at the LOQ.

<sup>(c)</sup>: The OECD guidance document on residues in livestock (series on pesticide 73) recommends three different approaches to derive MRLs for animal products; by applying a transfer factor (Tf), by intrapolation (It) or by linear regression (Ln). Fill in method(s) considered to derive the MRL proposals.

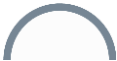

### Conversion Factors (CF) for monitoring to risk assessment

Not relevant.

### Processing factors (Regulation (EU) N° 283/2013, Annex Part A, points 6.5.2 and 6.5.3)

Not relevant

### OECD Guideline 508 and OECD Guidance, series on testing and assessment No 96

| Crop (RAC)/Edible part or Crop (RAC)/Processed product | Number of studies <sup>(a)</sup> | Processing Factor (PF) |           | Conversion Factor (CF <sub>p</sub> ) for RA <sup>(b)</sup> |
|--------------------------------------------------------|----------------------------------|------------------------|-----------|------------------------------------------------------------|
|                                                        |                                  | Individual values      | Median PF |                                                            |
| <b>Representative uses</b>                             |                                  |                        |           |                                                            |
| Sunflower seeds                                        | --                               | --                     | --        | --                                                         |
| Maize grain                                            | --                               | --                     | --        | --                                                         |

<sup>(a)</sup>: Studies with residues in the RAC at or close to the LOQ should be disregarded (unless concentration)

<sup>(b)</sup>: When the residue definition for risk assessment differs from the residue definition for monitoring

### Consumer risk assessment (Regulation (EU) N° 283/2013, Annex Part A, point 6.9)

– Provisional - The residue definition for risk assessment for rotational crops cannot be finalised in view of the identified data gaps. In consequence, the livestock exposure assessment could also not be finalised.

### Consumer risk assessment limited to the representative uses

|                                                 |                                                            |
|-------------------------------------------------|------------------------------------------------------------|
| <b>ADI</b>                                      | 0.03 mg/kg bw per day                                      |
| TMDI (% ADI), according to EFSA PRIMo rev 3.1   | Highest TMDI: 0.2 % ADI (NL toddlers)                      |
| IEDI (% ADI), according to EFSA PRIMo rev 3.1   | Not calculated; not relevant                               |
| Factors included in the calculations            | None                                                       |
| <b>ARfD</b>                                     | 0.5 mg/kg bw                                               |
| IESTI (% ARfD, according to EFSA PRIMo rev 3.1) | Highest IESTI: <1 % ARfD (sunflower seeds and maize grain) |
| Factors included in IESTI and NESTI             | None                                                       |

### Additional contribution to the consumer intakes through drinking water resulting from groundwater metabolite(s) expected to be present above 0.75 µg/L

|                                                                                                              |                                                                                                                                                                               |
|--------------------------------------------------------------------------------------------------------------|-------------------------------------------------------------------------------------------------------------------------------------------------------------------------------|
| Metabolite(s)                                                                                                | The PEC <sub>gw</sub> values calculated for numerous metabolites exceeded 0.75 µg/L (see Section 4 and Table 3).                                                              |
| ADI (mg/kg bw per day)                                                                                       | As these compounds were considered toxicologically relevant groundwater metabolites (see section 2), the consumer risk assessment through drinking water was not carried out. |
| Groundwater intake (% ADI)<br>Assessment according consumption figures reported in WHO guideline (WHO, 2009) | Consumer risk assessment through drinking water was not carried out.                                                                                                          |

### Proposed MRLs (Regulation (EU) No 283/2013, Annex Part A, points 6.7.2 and 6.7.3)

| Code <sup>(a)</sup> | Commodity/Group | MRL/Import tolerance <sup>(b)</sup> ( mg/kg) and Comments |
|---------------------|-----------------|-----------------------------------------------------------|
|---------------------|-----------------|-----------------------------------------------------------|

| <b>Plant commodities</b>        |                                      |       |                                    |
|---------------------------------|--------------------------------------|-------|------------------------------------|
| <b>Representative uses</b>      |                                      |       |                                    |
| 0401050                         | Sunflower seeds                      | 0.01* |                                    |
| 0500030                         | Maize/ corn                          | 0.01* |                                    |
| <b>Animal commodities</b>       |                                      |       |                                    |
| 1010000/<br>1020000/<br>1030000 | Animal tissues<br>Milk<br>Birds eggs |       | Open – See data gap <sup>(1)</sup> |

(a): Commodity code number, as listed in Annex I of Regulation (EC) No 396/2005

(b): MRLs proposed at the LOQ, should be annotated by an asterisk (\*) after the figure.



### Environmental fate and behaviour

#### Route of degradation (aerobic) in soil (Regulation (EU) N° 283/2013, Annex Part A, point 7.1.1.1)

|                                                                                                  |                                                                                                                                                                                                                                                                                                                                                                                                                                                                                               |
|--------------------------------------------------------------------------------------------------|-----------------------------------------------------------------------------------------------------------------------------------------------------------------------------------------------------------------------------------------------------------------------------------------------------------------------------------------------------------------------------------------------------------------------------------------------------------------------------------------------|
| Mineralisation after 100 days                                                                    | 0.3 – 29.0 % after 3 month, (n <sup>4</sup> = 19)                                                                                                                                                                                                                                                                                                                                                                                                                                             |
| Non-extractable residues after 100 days                                                          | 4.6 – 44.5 % after 3 month d, (n= 19)                                                                                                                                                                                                                                                                                                                                                                                                                                                         |
| Metabolites requiring further consideration - name and/or code, % of applied (range and maximum) | <p>ESA (CGA354743, CGACGA380168, CGA376944 (S-enantiomer), CGA380168 (S-enantiomer Sodium Salt) max. 21.3 % (20 °C) after 42 d, (n= 19); 23.6 % (10 °C) after 120 d (n=1)</p> <p>OXA (CGA51202/CGA351916) max. 21.1 % after 153 d, (n = 19)</p> <p>CGA40172 max. 6.5 % after 14 d</p> <p>CGA50720 max. 8.2 % after 3 month</p> <p>CGA368208 max. 7.6 % after 120 d</p> <p>CGA37735 max. 7.1 % after 181 d</p> <p>NOA436611 max. 9.1 % after 153 d</p> <p>CGA357704 max. 21.9 % after 28 d</p> |

#### Route of degradation (anaerobic) in soil (Regulation (EU) N° 283/2013, Annex Part A, point 7.1.1.2)

|                                                                                                                             |                                      |
|-----------------------------------------------------------------------------------------------------------------------------|--------------------------------------|
| Mineralisation after 100 days                                                                                               | No mineralisation                    |
| Non-extractable residues after 100 days                                                                                     | 36.6 % after 120 days                |
| Metabolites that may require further consideration for risk assessment - name and/or code, % of applied (range and maximum) | CGA41507 max. 44.2 % at 120 d (n= 1) |

#### Route of degradation (photolysis) on soil (Regulation (EU) N° 283/2013, Annex Part A, point 7.1.1.3)

|                                                                                                                             |                                                                 |
|-----------------------------------------------------------------------------------------------------------------------------|-----------------------------------------------------------------|
| Metabolites that may require further consideration for risk assessment - name and/or code, % of applied (range and maximum) | CGA41638 max. 5.4 % (moist soil) and 5.6 % (dry soil) at day 40 |
| Mineralisation at study end                                                                                                 | 1.4 – 1.5 % after 40 d                                          |
| Non-extractable residues at study end                                                                                       | 8.3 – 10.4 % after 40 d                                         |

#### Rate of degradation in soil (aerobic) laboratory studies substance (Regulation (EU) N° 283/2013, Annex Part A, point 7.1.2.1.-1 and Regulation (EU) N° 284/2013, Annex Part A, point 9.1.1.1)

#### Parent degradation rate values for trigger endpoints of S-metolachlor/metolachlor

<sup>4</sup> n corresponds to the number of soils.



| <b>Parent S-metolachlor (CGA77102, metolachlor)</b> |                      | Dark aerobic conditions |                  |                      |                      |                  |                                                                             |
|-----------------------------------------------------|----------------------|-------------------------|------------------|----------------------|----------------------|------------------|-----------------------------------------------------------------------------|
| Soil type                                           | Precursor            | pH <sup>a)</sup>        | t. °C / % MWHC   | DT <sub>50</sub> (d) | DT <sub>90</sub> (d) | St. ( $\chi^2$ ) | Method of calculation                                                       |
| Sandy clay loam (18 Acres) (2013)                   | S-meto <sup>c)</sup> | 5.7                     | 20, pF2          | 44.6                 | 4670 <sup>d)</sup>   | 2.1              | DFOP<br>k <sub>1</sub> = 0.0225<br>k <sub>2</sub> = 1.63e4<br>g = 0.7862    |
| Sandy clay loam (18 Acres) (2014)                   | S-meto <sup>c)</sup> | 6.3                     | 20, pF2          | 48.0                 | 493 <sup>e)</sup>    | 2.5              | FOMC<br>$\alpha$ = 0.90<br>$\beta$ = 41.45                                  |
| Loamy sand (Birkenheide)                            | S-meto <sup>c)</sup> | 5.6 (KCl)               | 20, 40 % MWHC    | 18.1                 | 128                  | 4.2              | FOMC<br>$\alpha$ = 1.274<br>$\beta$ = 25.09                                 |
| Loamy sand (Borstel) (2013)                         | S-meto <sup>c)</sup> | 5.3                     | 20, pF2          | 175                  | 583                  | 1.0              | SFO                                                                         |
| Loamy sand (Borstel) (2014)                         | S-meto <sup>c)</sup> | 6.1                     | 20, pF2          | 257                  | 16500 <sup>e)</sup>  | 1.8              | FOMC<br>$\alpha$ = 0.406<br>$\beta$ = 56.8                                  |
| Sandy loam (Buckeystown)                            | S-meto <sup>c)</sup> | 8.0 <sup>b)</sup>       | 25, 75 % 1/3 bar | 7.8                  | 44.3                 | 4.9              | DFOP<br>k <sub>1</sub> = 0.1077<br>k <sub>2</sub> = 0.00866<br>g = 0.8641   |
| Sandy loam (Buckeystown)                            | Meto <sup>d)</sup>   | 8.0 <sup>b)</sup>       | 25, 75 % 1/3 bar | 6.2                  | 33.8                 | 4.3              | DFOP<br>k <sub>1</sub> = 0.134<br>k <sub>2</sub> = 0.00914<br>g = 0.8767    |
| Sandy loam (Collombey)                              | Meto <sup>d)</sup>   | 7.4 (KCl)               | 20, 40 % MWHC    | 11.2                 | 37.1                 | 3.6              | SFO                                                                         |
| Silt loam (Gardner)                                 | S-meto <sup>c)</sup> | 7.6                     | 20, pF2          | 91.6                 | 304                  | 1.0              | SFO                                                                         |
| Sandy loam (Gardner)                                | S-meto <sup>c)</sup> | 7.5                     | 20, pF2          | 91.7                 | 305                  | 3.5              | SFO                                                                         |
| Loam (Gartenacker)                                  | S-meto <sup>c)</sup> | 7.3 (KCl)               | 20, 75 % 1/3 bar | 13.2                 | 43.9                 | 10.3             | SFO                                                                         |
| Loam (Gartenacker)                                  | Meto <sup>d)</sup>   | 7.3 (KCl)               | 20, 75 % 1/3 bar | 15.2                 | 50.6                 | 4.6              | SFO                                                                         |
| Loam (Gartenacker)                                  | S-meto <sup>c)</sup> | 7.3                     | 20, pF2          | 26.2                 | 68.3                 | 3.2              | HS<br>k <sub>1</sub> = 0.01137<br>k <sub>2</sub> = 0.0382<br>tb = 11.44     |
| Silt loam (Gartenacker)                             | S-meto <sup>c)</sup> | 7.5                     | 20, pF2          | 35.5                 | 89.5                 | 3.2              | HS<br>k <sub>1</sub> = 0.0255<br>k <sub>2</sub> = 0.02983<br>tb = 21.15     |
| Silt loam (GartenackerA)                            | S-meto <sup>c)</sup> | 7.3 (KCl)               | 20, 60 % FC      | 16.3                 | 54.3                 | 6.8              | SFO                                                                         |
| Loamy sand (Standard soil 2.2) (Neuhofen)           | S-meto <sup>c)</sup> | 5.7 <sup>b)</sup>       | 20, 40 % MWHC    | 32.4                 | 45600 <sup>f)</sup>  | 5.3              | DFOP<br>k <sub>1</sub> = 0.0252<br>k <sub>2</sub> = 7.15e7<br>g = 0.8967    |
| Loamy sand (Standard soil 2.2) (Speyer)             | Meto <sup>d)</sup>   | 5.7 (KCl)               | 20, 40 % MWHC    | 17.8                 | 75.5                 | 2.5              | DFOP<br>k <sub>1</sub> = 0.04349<br>k <sub>2</sub> = 0.002754<br>g = 0.9195 |
| Sandy loam (Lorsch)                                 | S-meto <sup>c)</sup> | 5.2 (KCl)               | 20, 40 % MWHC    | 49.9                 | 166                  | 6.9              | SFO                                                                         |
| Sandy loam (Pappelacker)                            | S-meto <sup>c)</sup> | 7.6 <sup>b)</sup>       | 20, 40 % MWHC    | 17.5                 | 78.5                 | 4.5              | DFOP<br>k <sub>1</sub> = 0.1538<br>k <sub>2</sub> = 0.0258<br>g = 0.2416    |

|                    |                      |                   |               |      |      |     |                                             |
|--------------------|----------------------|-------------------|---------------|------|------|-----|---------------------------------------------|
| Sandy loam (Weide) | Meto <sup>d)</sup>   | 7.6 (KCl)         | 20, 40 % MWHC | 11.8 | 39.1 | 4.3 | SFO                                         |
| Sandy loam (Weide) | S-meto <sup>c)</sup> | 7.6 <sup>b)</sup> | 20, 40 % MWHC | 11.9 | 54.5 | 4.5 | FOMC<br>$\alpha = 2.745$<br>$\beta = 41.44$ |
| Maximum value      |                      |                   |               | 257  |      |     |                                             |

<sup>a)</sup> Measured in H<sub>2</sub>O unless otherwise stated

<sup>b)</sup> Medium not stated

<sup>c)</sup> S-metolachlor typically 99.4% CGA 77102

<sup>d)</sup> Meto mixture S- and R-isomer (R-isomer 0-50%)

<sup>e)</sup> DT<sub>90</sub> not valid, (biphasic DT<sub>50/90</sub> extrapolated far beyond the duration of the experiment should be interpreted with care (FOCUS 2006))

<sup>f)</sup> DT<sub>90</sub> not valid, limited datapoints and k2 t-test not robust

### Parent degradation rate values for modelling endpoints of S-metolachlor/metolachlor

| Parent DT <sub>50</sub> values for modelling endpoints of S-metolachlor |                         |                   |                  |                      |                                                    |                  |                                                           |
|-------------------------------------------------------------------------|-------------------------|-------------------|------------------|----------------------|----------------------------------------------------|------------------|-----------------------------------------------------------|
| Parent S-metolachlor (CGA77102, metolachlor)                            | Dark aerobic conditions |                   |                  |                      |                                                    |                  |                                                           |
| Soil type                                                               | Precur sor              | pH <sup>a)</sup>  | t. °C / % MWHC   | DT <sub>50</sub> (d) | DT <sub>50</sub> (d) 20 °C pF2/10kPa <sup>b)</sup> | St. ( $\chi^2$ ) | Method of calculation                                     |
| Sandy clay loam (18 Acres)                                              | S-meto <sup>d)</sup>    | 5.7               | 20, pF2          | 97.2                 | 91.2                                               | 1.4              | slow phase HS<br>$k_{slow} = 0.007132$                    |
| Sandy clay loam (18 Acres)                                              | S-meto <sup>d)</sup>    | 6.3               | 20, pF2          | 84.8                 | 84.8                                               | 1.9              | slow phase HS<br>$k_{slow} = 0.008178$                    |
| Geometric mean 18 Acres                                                 |                         |                   |                  | 90.8                 | 87.9                                               |                  |                                                           |
| Loamy sand (Birkenheide)                                                | S-meto <sup>d)</sup>    | 5.6 (KCl)         | 20, 40 % MWHC    | 38.6                 | 24.5                                               | 4.2              | FOMC<br>DT <sub>90</sub> /3.32<br>DT <sub>90</sub> = 128  |
| Loamy sand (Borstel)                                                    | S-meto <sup>d)</sup>    | 5.3               | 20, pF2          | 175                  | 173                                                | 1.0              | SFO                                                       |
| Loamy sand (Borstel)                                                    | S-meto <sup>d)</sup>    | 6.1               | 20, pF2          | 221                  | 221                                                | 1.7              | Slow phase HS<br>$k_{slow} = 0.003131$                    |
| Geometric mean Borstel (n=2)                                            |                         |                   |                  | 196.7                | 195.5                                              |                  |                                                           |
| Sandy loam (Buckeystown)                                                | S-meto <sup>d)</sup>    | 8.0 <sup>c)</sup> | 25, 75 % 1/3 bar | 13.2                 | 15.3                                               | 4.9              | FOMC<br>DT <sub>90</sub> /3.32<br>DT <sub>90</sub> = 43.9 |
| Sandy loam (Buckeystown)                                                | Meto <sup>e)</sup>      | 8.0 <sup>c)</sup> | 25, 75 % 1/3 bar | 10.1                 | 11.7                                               | 4.3              | FOMC<br>DT <sub>90</sub> /3.32<br>DT <sub>90</sub> = 33.4 |
| Geometric mean Buckeystown (n=2)                                        |                         |                   |                  | 11.5                 | 13.4                                               |                  |                                                           |
| Sandy loam (Collombey)                                                  | Meto <sup>e)</sup>      | 7.4 (KCl)         | 20, 40 % MWHC    | 11.2                 | 11.2                                               | 3.6              | SFO                                                       |
| Silt loam (Gardner)                                                     | S-meto <sup>d)</sup>    | 7.6               | 20, pF2          | 91.6                 | 79.5                                               | 1.0              | SFO                                                       |
| Sandy loam (Gardner)                                                    | S-meto <sup>d)</sup>    | 7.5               | 20, pF2          | 91.7                 | 91.7                                               | 3.5              | SFO                                                       |
| Geometric mean Gardner (n=2)                                            |                         |                   |                  | 91.6                 | 85.4                                               |                  |                                                           |

|                                               |                      |                   |                  |           |             |      |                                                     |
|-----------------------------------------------|----------------------|-------------------|------------------|-----------|-------------|------|-----------------------------------------------------|
| Loam (Gartenacker)                            | S-meto <sup>d)</sup> | 7.3 (KCl)         | 20, 75 % 1/3 bar | 13.2      | 12.6        | 10.3 | SFO                                                 |
| Loam (Gartenacker)                            | Meto <sup>e)</sup>   | 7.3 (KCl)         | 20, 75 % 1/3 bar | 15.2      | 14.6        | 4.6  | SFO                                                 |
| Loam (Gartenacker)                            | S-meto <sup>d)</sup> | 7.3               | 20, pF2          | 26.2      | 24.7        | 3.2  | Lag phase, overall DT <sub>50</sub> HS              |
| Silt loam (Gartenacker)                       | S-meto <sup>d)</sup> | 7.5               | 20, pF2          | 35.5      | 30.8        | 3.2  | Lag phase overall DT <sub>50</sub> HS               |
| Silt loam (GartenackerA)                      | S-meto <sup>d)</sup> | 7.3 (KCl)         | 20, 60 % FC      | 16.3      | 12.5        | 6.8  | SFO                                                 |
| Geometric mean Gartenacker (n=5)              |                      |                   |                  | 19.8      | 17.7        |      |                                                     |
| Loamy sand (Standard soil 2.2) (Neuhofen)     | S-meto <sup>d)</sup> | 5.7 <sup>c)</sup> | 20, 40 % MWHC    | 48.8      | 48.8        | 5.5  | FOMC DT <sub>90</sub> /3.32 DT <sub>90</sub> = 162  |
| Loamy sand (Standard soil 2.2) (Speyer)       | Meto <sup>e)</sup>   | 5.7 (KCl)         | 20, 40 % MWHC    | 24        | 24          | 3.4  | FOMC DT <sub>90</sub> /3.32 DT <sub>90</sub> = 79.8 |
| Geometric mean German standard soil 2.2 (n=2) |                      |                   |                  | 34.2      | 34.2        |      |                                                     |
| Sandy loam (Lorsch)                           | S-meto <sup>d)</sup> | 5.2 (KCl)         | 20, 40 % MWHC    | 49.9      | 32.9        | 6.9  | SFO                                                 |
|                                               |                      |                   |                  |           |             |      |                                                     |
| Sandy loam (Pappelacker)                      | S-meto <sup>d)</sup> | 7.6 <sup>c)</sup> | 20, 40 % MWHC    | 25.3      | 15.3        | 4.5  | FOMC DT <sub>90</sub> /3.32 DT <sub>90</sub> = 84   |
|                                               |                      |                   |                  |           |             |      |                                                     |
| Sandy loam (Weide)                            | Meto <sup>e)</sup>   | 7.6 (KCl)         | 20, 40 % MWHC    | 11.8      | 11.8        | 4.3  | SFO                                                 |
| Sandy loam (Weide)                            | S-meto <sup>d)</sup> | 7.6 <sup>c)</sup> | 20, 40 % MWHC    | 16.4      | 10.3        | 4.5  | FOMC DT <sub>90</sub> /3.32 DT <sub>90</sub> = 54.5 |
| Geometric mean Weide (n=2)                    |                      |                   |                  | 13.9      | 11.0        |      |                                                     |
| <b>Geometric mean (n = 11)</b>                |                      |                   |                  |           | <b>30.1</b> |      |                                                     |
| <b>pH dependence</b>                          |                      |                   |                  | <b>no</b> |             |      |                                                     |

<sup>a)</sup> Measured in H<sub>2</sub>O unless otherwise stated

<sup>b)</sup> Normalised using a Q10 of 2.58 and Walker equation coefficient of 0.7

<sup>c)</sup> Medium not stated

<sup>d)</sup> S-meto typically 99.4% CGA77102

<sup>e)</sup> Meto: mixture S- and R-isomer (r-isomer 0-50%)

### Rate of degradation in soil (aerobic) laboratory studies transformation products (Regulation (EU) N° 283/2013, Annex Part A, point 7.1.2.1.2 and Regulation (EU) N° 284/2013, Annex Part A, point 9.1.1.1)

|                                                             |                         |                  |                |                                        |                                        |                                                    |                       |                       |
|-------------------------------------------------------------|-------------------------|------------------|----------------|----------------------------------------|----------------------------------------|----------------------------------------------------|-----------------------|-----------------------|
| <b>CGA354743/CGA380168 (S-enantiomer Sodium Salt) (ESA)</b> | Dark aerobic conditions |                  |                |                                        |                                        |                                                    |                       |                       |
| Soil type                                                   | Precursor               | pH <sup>a)</sup> | t. °C / % MWHC | DT <sub>50</sub> /DT <sub>90</sub> (d) | f. f. k <sub>f</sub> / k <sub>dp</sub> | DT <sub>50</sub> (d) 20 °C pF2/10kPa <sup>b)</sup> | St. (χ <sup>2</sup> ) | Method of calculation |
| Sandy clay loam (18 Acres)                                  | S-meto <sup>d)</sup>    | 5.7              | 20, pF2        | >1000 / >1000                          | 0.08197                                | 1000                                               | 10.1                  | SFO                   |

|                                                |                      |                   |                  |               |                      |       |      |     |
|------------------------------------------------|----------------------|-------------------|------------------|---------------|----------------------|-------|------|-----|
| Sandy clay loam (18 Acres)                     | S-meto <sup>d)</sup> | 6.3               | 20, pF2          | >1000 / >1000 | 0.08142              | 1000  | 9.3  | SFO |
| Loamy sand (Birkenheide)                       | S-meto <sup>d)</sup> | 5.6 (KCl)         | 20, 40 % MWHC    | 815 / >1000   | 0.1571               | 517   | 2.6  | SFO |
| Sandy loam (Buckeystown)                       | S-meto <sup>d)</sup> | 8.0 <sup>e)</sup> | 25, 75 % 1/3 bar | 199 /660      | 0.1311               | 230   | 12.3 | SFO |
| Sandy loam (Buckeystown)                       | Meto <sup>e)</sup>   | 8.0 <sup>e)</sup> | 25, 75 % 1/3 bar | 203 / 676     | 0.1115               | 235.3 | 10.9 | SFO |
| Geometric mean Buckeystown (n=2)               |                      |                   |                  | -             | -                    | 233   |      |     |
| Arithmetic mean Buckeystown (n=2)              |                      |                   |                  | -             | 0.121                | -     |      |     |
| Sandy loam (Collombey)                         | Meto <sup>e)</sup>   | 7.4 (KCl)         | 20, 40 % MWHC    | 65.7 / 218    | 0.1430               | 65.7  | 13.4 | SFO |
| Sandy clay loam (Gardner)                      | S-meto <sup>d)</sup> | 7.6               | 20, pF2          | >1000 / >1000 | 0.1367               | 1000  | 11.5 | SFO |
| Sandy clay loam (Gardner)                      | S-meto <sup>d)</sup> | 7.5               | 20, pF2          | >1000 / >1000 | 0.1174               | 1000  | 14.1 | SFO |
| Loam (Gartenacker)                             | S-meto <sup>d)</sup> | 7.3 (KCl)         | 20, 75 % 1/3bar  | 147 /488      | 0.2599               | 141   | 9.5  | SFO |
| Loam (Gartenacker)                             | S-meto <sup>d)</sup> | 7.3               | 20, pF2          | 28.8 / 95.5   | 0.1285               | 27.2  | 29.2 | SFO |
| Silt loam (Gartenacker)                        | S-meto <sup>d)</sup> | 7.5               | 20, pF2          | 168 / 557     | 0.2175               | 146   | 6.7  | SFO |
| Silt loam (Gartenacker)                        | ESA                  | 7.5               | 20, pF2          | 30.6 / 102    | -                    | 30.6  | 3.4  | SFO |
| Silt loam (Gartenacker)                        | ESA                  | 7.5               | 20, 75 % 1/3 bar | 66.7 / 221    | -                    | 46.9  | 1.4  | SFO |
| Silt loam (Gartenacker)                        | SYN5468 29           | 7.6               | 20, pF2 – pF     | 157 / 521     | 0.2319 <sup>d)</sup> | 145   | 9.6  | SFO |
| Loam (GartenackerA)                            | S-meto <sup>d)</sup> | 7.3 (KCl)         | 20, 60 % FC      | 65 /216       | 0.3020               | 49.9  | 9.8  | SFO |
| Loamy sand (Standard soil 2.2. (Neuhofen))     | S-meto <sup>d)</sup> | 5.7 <sup>e)</sup> | 20, 40 % MWHC    | >1000 / >1000 | 0.1586               | 1000  | 21   | SFO |
| Loamy sand (Standard soil 2.2, Speyer)         | Meto <sup>e)</sup>   | 5.7 (KCl)         | 20, 40 % MWHC    | >1000 / >1000 | 0.1597               | 1000  | 13.3 | SFO |
| Geometric mean German standard soil 2.2 (n=2)  |                      |                   |                  | -             | -                    | 1000  |      |     |
| Arithmetic mean German standard soil 2.2 (n=2) |                      |                   |                  | -             | 0.159                | -     |      |     |
| Sandy loam (Lorsch)                            | S-meto <sup>d)</sup> | 5.2 (KCl)         | 20, 40 % MWHC    | >1000 / >1000 | 0.138                | 1000  | 12.4 | SFO |
| Sandy loam (Lorsch)                            | ESA                  | 5.2 (KCl)         | 20, 40 % MWHC    | 849 / >1000   | -                    | 560   | 1    | SFO |
| Geometric mean Lorsch (n=2)                    |                      |                   |                  | -             | -                    | 748.3 |      |     |
| Silty clay (Marsillargues)                     | SYN5468 29           | 8.0               | pF2 – pF2.5      | 134 /444      | -                    | 113   | 13.4 | SFO |

|                                |                      |                   |               |            |        |              |              |     |
|--------------------------------|----------------------|-------------------|---------------|------------|--------|--------------|--------------|-----|
| Sandy loam (Pappelacker)       | S-meto <sup>d)</sup> | 7.6 <sup>c)</sup> | 20, 40 % MWHC | 149 / 496  | 0.1970 | 90           | 15.6         | SFO |
| Loamy sand (Pappelacker)       | ESA                  | 7.5               | 20, pF2       | 33.7 / 112 | -      | 33.7         | 2            | SFO |
| Sandy loam (Weide)             | Meto <sup>e)</sup>   | 7.6 (KCl)         | 20, 40 % MWHC | 53.1 / 176 | 0.2028 | 53.1         | 11.2         | SFO |
| Sandy loam (Weide)             | S-meto <sup>d)</sup> | 7.6 <sup>c)</sup> | 20, 40 % MWHC | 109 / 362  | 0.1828 | 69           | 21.4         | SFO |
| Loamy sand (Weide)             | ESA                  | 7.5               | 20, pF2       | 32.8 / 109 | -      | 32.8         | 1.7          | SFO |
| <b>Geometric mean (n = 22)</b> |                      |                   |               |            |        |              | <b>154.4</b> |     |
| <b>Arithmetic mean (n =16)</b> |                      |                   |               |            |        | <b>0.164</b> |              |     |
| <b>pH dependence</b>           |                      |                   |               |            |        | <b>no</b>    |              |     |

<sup>a)</sup> Measured in H<sub>2</sub>O unless otherwise stated

<sup>b)</sup> Normalised using a Q<sub>10</sub> of 2.58 and Walker equation coefficient of 0.7

<sup>c)</sup> Medium not stated

<sup>d)</sup> S-meto typically 99.4% CGA77102

<sup>e)</sup> Meto mixture S- and R-isomer (r-isomer 0-50%)

<sup>f)</sup> Not used to calculate the arithmetic mean as precursor is SYN546829

### Rate of degradation in soil (aerobic) laboratory studies transformation products (Regulation (EU) N° 283/2013, Annex Part A, point 7.1.2.1.2 and Regulation (EU) N° 284/2013, Annex Part A, point 9.1.1.1)

| CGA51202/CGA 351916 (OXA)         |                      | Dark aerobic conditions |                  |                                        |                                       |                                                    |                       |                       |
|-----------------------------------|----------------------|-------------------------|------------------|----------------------------------------|---------------------------------------|----------------------------------------------------|-----------------------|-----------------------|
| Soil type                         | Precursor            | pH <sup>a)</sup>        | t. °C / % MWHC   | DT <sub>50</sub> /DT <sub>90</sub> (d) | f. f. k <sub>f</sub> /k <sub>dp</sub> | DT <sub>50</sub> (d) 20 °C pF2/10kPa <sup>b)</sup> | St. (χ <sup>2</sup> ) | Method of calculation |
| Sandy clay loam (18 Acres)        | S-meto <sup>d)</sup> | 5.7                     | 20, pF2          | >1000 / >1000                          | 0.1382                                | 1000                                               | 16.6                  | SFO                   |
| Sandy clay loam (18 Acres)        | S-meto <sup>d)</sup> | 6.3                     | 20, pF2          | >1000 / >1000                          | 0.1717                                | 1000                                               | 11.3                  | SFO                   |
| Loamy sand (Birkenheide)          | S-meto <sup>d)</sup> | 5.6 (KCl)               | 20, 40 % MWHC    | >1000 / >1000                          | 0.186                                 | 1000                                               | 5.1                   | SFO                   |
| Borstel                           | S-meto <sup>d)</sup> | 5.3                     | 20, pF2          | >1000 / >1000                          | 0.140                                 | 1000                                               | 19.3                  | SFO                   |
| Sandy loam (Buckeystown)          | S-meto <sup>d)</sup> | 8.0 <sup>c)</sup>       | 25, 75 % 1/3 bar | 66.8 /222                              | 0.1589                                | 77.4                                               | 9.9                   | SFO                   |
| Sandy loam (Buckeystown)          | Meto <sup>e)</sup>   | 8.0 <sup>c)</sup>       | 25, 75 % 1/3 bar | 72.2 /240                              | 0.1438                                | 83.7                                               | 8.6                   | SFO                   |
| Geometric mean Buckeystown (n=2)  |                      |                         |                  | -                                      | -                                     | 80.5                                               |                       |                       |
| Arithmetic mean Buckeystown (n=2) |                      |                         |                  | -                                      | 0.151                                 | -                                                  |                       |                       |
| Sandy loam (Collombey)            | Meto <sup>e)</sup>   | 7.4 (KCl)               | 20, 40 % MWHC    | 21.3 / 70.3                            | 0.1690                                | 21.3                                               | 14.3                  | SFO                   |
| Sandy clay loam (Gardner)         | S-meto <sup>d)</sup> | 7.6                     | 20, pF2          | >1000 / >1000                          | 0.1709                                | 1000                                               | 12                    | SFO                   |

| CGA51202/CGA 351916 (OXA)                          |                      | Dark aerobic conditions |                  |                                        |                                       |                                                    |                       |                       |
|----------------------------------------------------|----------------------|-------------------------|------------------|----------------------------------------|---------------------------------------|----------------------------------------------------|-----------------------|-----------------------|
| Soil type                                          | Precursor            | pH <sup>a)</sup>        | t. °C / % MWHC   | DT <sub>50</sub> /DT <sub>90</sub> (d) | f. f. k <sub>f</sub> /k <sub>dp</sub> | DT <sub>50</sub> (d) 20 °C pF2/10kPa <sup>b)</sup> | St. (χ <sup>2</sup> ) | Method of calculation |
| Sandy loam (Gardner)                               | S-meto <sup>d)</sup> | 7.5                     | 20, pF2          | >1000 / >1000                          | 0.2202                                | 1000                                               | 18.1                  | SFO                   |
| Loam (Gartenacker)                                 | S-meto <sup>d)</sup> | 7.3 (KCl)               | 20, 75 % 1/3 bar | 45.6 / 151                             | 0.1831                                | 43.7                                               | 8.1                   | SFO                   |
| Loam (Gartenacker)                                 | S-meto <sup>d)</sup> | 7.3                     | 20, pF2          | 90.7 / 301                             | 0.2205                                | 85.6                                               | 4.7                   | SFO                   |
| Silt loam (Gartenacker)                            | S-meto <sup>d)</sup> | 7.5                     | 20, pF2          | 36.8 / 122                             | 0.2148                                | 32                                                 | 7                     | SFO                   |
| Silt loam (Gartenacker)                            | OXA                  | 7.4 (KCl)               | 20, 40 % MWHC    | 38.9 / 129                             | -                                     | 24.2                                               | 3.1                   | SFO                   |
| Silt loam (Gartenacker)                            | OXA                  | 7.4 (KCl)               | 20, 40 % MWHC    | 25.9 / 86.0                            | -                                     | 16.1                                               | 3.8                   | SFO                   |
| Loamy sand (Gartenacker)                           | OXA                  | 7.5                     | 20, pF2          | 12.2 / 40.6                            | -                                     | 12.2                                               | 12.9                  | SFO                   |
| Loamy sand (Standard soil 2.2 (Neuhofen))          | S-meto <sup>d)</sup> | 5.7 <sup>c)</sup>       | 20, 40 % MWHC    | 307 / >1000                            | 0.2001                                | 307                                                | 12.2                  | SFO                   |
| Loamy sand (Standard soil 2.2 (Speyer))            | Meto <sup>e)</sup>   | 5.7 (KCl)               | 20, 40 % MWHC    | 41.8                                   | 0.1577                                | 41.8                                               | 33.8                  | SFO                   |
| Geometric mean German standard soil 2.2 (n=2)      |                      |                         |                  | 113.4                                  | -                                     | 113.4                                              |                       |                       |
| Arithmetic mean German standard soil 2.2 (n=2)     |                      |                         |                  | -                                      | 0.179                                 | -                                                  |                       |                       |
| Sandy loam (Lorsch)                                | S-meto <sup>d)</sup> | 5.2 (KCl)               | 20, 40 % MWHC    | 876 / > 1000                           | 0.272                                 | 1000                                               | 13.2                  | SFO                   |
| Silt loam (Lorsch)                                 | OXA                  | 5.7                     | pF2 – pF2.5      | 326 / > 1000                           | -                                     | 215                                                | 2.2                   | SFO                   |
| Sandy loam (Pappelacker)                           | S-meto <sup>d)</sup> | 7.6 <sup>c)</sup>       | 20, 40 % MWHC    | 53.5 / 178                             | 0.1407                                | 32.5                                               | 21.7                  | SFO                   |
| Sandy loam (Pappelacker)                           | OXA                  | 7.7                     | 20, 40 % MWHC    | 16.6 7 55.1                            | -                                     | 16.6                                               | 12.5                  | SFO                   |
| Sandy loam (Weide)                                 | Meto <sup>e)</sup>   | 7.6 (KCl)               | 20, 40 % MWHC    | 25.2 / 83.7                            | 0.1380                                | 25.2                                               | 22.8                  | SFO                   |
| Sandy loam (Weide)                                 | S-meto <sup>d)</sup> | 7.6 <sup>c)</sup>       | 20, 40 % MWHC    | 23.7 / 78.7                            | 0.1181                                | 14.9                                               | 23.9                  | SFO                   |
| Sandy loam (Weide)                                 | OXA                  | 7.6                     | 20,75 % 1/3bar   | 13.6 / 45.0                            | -                                     | 13.6                                               | 10.8                  | SFO                   |
| <b>Geometric mean (if not pH dependent) (n=22)</b> |                      |                         |                  |                                        |                                       | <b>98.1</b>                                        |                       |                       |
| <b>Arithmetic mean (n=16)</b>                      |                      |                         |                  |                                        | <b>0.176</b>                          |                                                    |                       |                       |
| <b>pH dependence</b>                               |                      |                         |                  | <b>no</b>                              |                                       |                                                    |                       |                       |

<sup>a)</sup> Measured in H<sub>2</sub>O unless otherwise stated

- b) Normalised using a  $Q_{10}$  of 2.58 and Walker equation coefficient of 0.7  
 c) Medium not stated  
 d) S-meto typically 99.4% CGA77102  
 e) Meto mixture S- and R-isomer (r-isomer 0-50%)

| CGA368208                                         |           | Dark aerobic conditions<br>Metabolite dosed or the precursor from which the f.f. was derived is ESA. |                    |                                            |                                           |                                                           |                     |                          |
|---------------------------------------------------|-----------|------------------------------------------------------------------------------------------------------|--------------------|--------------------------------------------|-------------------------------------------|-----------------------------------------------------------|---------------------|--------------------------|
| Soil type                                         | Precursor | pH <sup>a)</sup>                                                                                     | t. °C / %<br>MWHC  | DT <sub>50</sub> / DT <sub>90</sub><br>(d) | f. f. k <sub>f</sub> /<br>k <sub>dp</sub> | DT <sub>50</sub> (d)<br>20 °C pF2/10<br>kPa <sup>b)</sup> | St.<br>( $\chi^2$ ) | Method of<br>calculation |
| Silt loam<br>(Gartenacker)                        | ESA       | 7.7                                                                                                  | 20, 75 %<br>1/3bar | 163 /543                                   | 0.4369 <sup>c)</sup>                      | 115                                                       | 12.4                | SFO                      |
| Silt loam<br>(Gartenacker)                        | ESA       | 7.5                                                                                                  | 20, pF2            | 20.4 / 67.7                                | 0.3903 <sup>d)</sup>                      | 20.4                                                      | 25.4                | SFO                      |
| Geometric mean Gartenacker (n=2)                  |           |                                                                                                      |                    | -                                          | -                                         | 48.5                                                      |                     |                          |
| Arithmetic mean Gartenacker (n=2)                 |           |                                                                                                      |                    | -                                          | 0.414                                     | -                                                         |                     |                          |
| Loamy sand<br>(Pappelacker)                       | ESA       | 7.5                                                                                                  | 20, pF2            | 44.5 / 148                                 | 0.5014 <sup>d)</sup>                      | 44.5                                                      | 19.0                | SFO                      |
| Loamy sand<br>(Weide)                             | ESA       | 7.5                                                                                                  | 20, pF2            | 23.4 /77.8                                 | 0.5266 <sup>d)</sup>                      | 23.4                                                      | 25.4                | SFO                      |
| <b>Geometric mean (if not pH dependent) (n=3)</b> |           |                                                                                                      |                    |                                            |                                           | <b>36.9</b>                                               |                     |                          |
| <b>Maximum non-normalized (n=3)</b>               |           |                                                                                                      |                    | <b>163</b>                                 | -                                         | -                                                         | -                   | <b>SFO</b>               |
| <b>Arithmetic mean (n=3)</b>                      |           |                                                                                                      |                    |                                            | <b>0.481</b>                              |                                                           |                     |                          |
| <b>pH dependence</b>                              |           |                                                                                                      |                    |                                            |                                           | <b>Not determined, only one soil pH tested</b>            |                     |                          |

f) Measured in H<sub>2</sub>O

g) Normalised using a  $Q_{10}$  of 2.58 and Walker equation coefficient of 0.7

h) From ESA

i) via NOAA13713

| CGA37735                                          |              | Dark aerobic conditions |                   |                                               |                                           |                                                           |                     |                          |
|---------------------------------------------------|--------------|-------------------------|-------------------|-----------------------------------------------|-------------------------------------------|-----------------------------------------------------------|---------------------|--------------------------|
| Soil type                                         | Precursor    | pH <sup>a)</sup>        | t. °C / %<br>MWHC | DT <sub>50</sub> /<br>DT <sub>90</sub><br>(d) | f. f. k <sub>f</sub> /<br>k <sub>dp</sub> | DT <sub>50</sub> (d)<br>20 °C<br>pF2/10 kPa <sup>b)</sup> | St.<br>( $\chi^2$ ) | Method of<br>calculation |
| Silt loam<br>(Gartenacker)                        | CGA377<br>35 | 7.6                     | 20, pF 2-2.5      | 0.5 /1.7                                      | -                                         | 0.46                                                      | 9.0                 | SFO                      |
| Sandy clay<br>loam<br>(18 Acres)                  | CGA377<br>35 | 6.5                     | 20, pF 2-2.5      | 1.36 / 4.5                                    | -                                         | 1.14                                                      | 4.9                 | SFO                      |
| Silty clay loam<br>(Marsillargues)                | CGA377<br>35 | 8.0                     | 20, pF 2-2.5      | 1.19 / 4.0                                    | -                                         | 1.02                                                      | 6.2                 | SFO                      |
| <b>Geometric mean (if not pH dependent) (n=3)</b> |              |                         |                   |                                               |                                           | <b>0.80</b>                                               |                     |                          |
| <b>Maximum non-normalized (n=3)</b>               |              |                         |                   | <b>1.4</b>                                    | -                                         | -                                                         | -                   | <b>SFO</b>               |
| <b>Arithmetic mean</b>                            |              |                         |                   |                                               | -                                         |                                                           |                     |                          |
| <b>pH dependence</b>                              |              |                         |                   |                                               |                                           | <b>no</b>                                                 |                     |                          |

a) Measured in H<sub>2</sub>O

b) Normalised using a  $Q_{10}$  of 2.58 and Walker equation coefficient of 0.7

| CGA40172                                                                                                       |                      |                  |                     |                                               |                                           |                                                           |                          |                          |
|----------------------------------------------------------------------------------------------------------------|----------------------|------------------|---------------------|-----------------------------------------------|-------------------------------------------|-----------------------------------------------------------|--------------------------|--------------------------|
| Dark aerobic conditions<br>Metabolite dosed or the precursor from which the f.f. was derived was S-metolachlor |                      |                  |                     |                                               |                                           |                                                           |                          |                          |
| Soil type                                                                                                      | Precursor            | pH <sup>a)</sup> | t. °C / %<br>MWHC   | DT <sub>50</sub> /<br>DT <sub>90</sub><br>(d) | f. f. k <sub>f</sub> /<br>k <sub>dp</sub> | DT <sub>50</sub> (d)<br>20 °C<br>pF2/10 kPa <sup>b)</sup> | St.<br>(χ <sup>2</sup> ) | Method of<br>calculation |
| Buckeystown                                                                                                    | S-meto <sup>c)</sup> | 8.0              | 25, 75 %<br>1/3 bar | 115 / 380                                     | 0.0991                                    | 133.3                                                     | 13.9                     | SFO                      |
| <b>Single value (data gap identified for investigations from 3 field dissipation studies)</b>                  |                      |                  |                     |                                               |                                           | <b>133.3</b>                                              |                          |                          |
| <b>Single value</b>                                                                                            |                      |                  |                     |                                               |                                           | <b>0.0991</b>                                             |                          |                          |
| <b>pH dependence</b>                                                                                           |                      |                  |                     |                                               |                                           | <b>Not determined</b>                                     |                          |                          |

a) Medium not stated

b) Normalised using a Q<sub>10</sub> of 2.58 and Walker equation coefficient of 0.7

c) S-meto typically 99.4% CGA 77102

| CGA50720                                          |                    |                  |                   |                                               |                                           |                                                          |                          |                          |
|---------------------------------------------------|--------------------|------------------|-------------------|-----------------------------------------------|-------------------------------------------|----------------------------------------------------------|--------------------------|--------------------------|
| Dark aerobic conditions                           |                    |                  |                   |                                               |                                           |                                                          |                          |                          |
| Soil type                                         | Precursor          | pH <sup>a)</sup> | t. °C / %<br>MWHC | DT <sub>50</sub> /<br>DT <sub>90</sub><br>(d) | f. f. k <sub>f</sub> /<br>k <sub>dp</sub> | DT <sub>50</sub> (d)<br>20 °C<br>pF2/10kPa <sup>b)</sup> | St.<br>(χ <sup>2</sup> ) | Method of<br>calculation |
| Sandy clay loam (18 Acres)                        | CGA377 35          | 6.5              | 20, pF2-pF 2.5    | 11.3 / 37.7                                   | 0.804 <sup>c)</sup>                       | 9.5                                                      | 8.6                      | SFO                      |
| Sandy loam (Collombey)                            | Meto <sup>f)</sup> | 7.4 (KCl)        | 20, 40 % MWHC     | 17.3 / 57.6                                   | 1 <sup>d)</sup><br>1 <sup>e)</sup>        | 17.3                                                     | 14.3                     | SFO                      |
| Silt loam (Gartenacker)                           | CGA377 35          | 7.6              | 20, pF2-pF 2.5    | 4.74 / 15.8                                   | 1 <sup>c)</sup>                           | 4.43                                                     | 13.2                     | SFO                      |
| Silty clay (Marsillargues)                        | CGA377 35          | 8.0              | 20, pF2 – pF 2.5  | 8.5 / 28.2                                    | 0.707 <sup>c)</sup>                       | 7.3                                                      | 8.8                      | SFO                      |
| Sandy loam (Weide)                                | Meto <sup>f)</sup> | 7.6 (KCl)        | 20, 40 % MWHC     | 23 / 76.3                                     | 0.528 <sup>d)</sup><br>1 <sup>e)</sup>    | 23                                                       | 3.9                      | SFO                      |
| <b>Geometric mean (if not pH dependent) (n=5)</b> |                    |                  |                   |                                               |                                           | <b>10.4</b>                                              |                          |                          |
| <b>Arithmetic mean from CGA37735 (n=3)</b>        |                    |                  |                   |                                               |                                           | <b>0.837</b>                                             |                          |                          |
| <b>Arithmetic mean from OXA (n=2)</b>             |                    |                  |                   |                                               |                                           | <b>1</b>                                                 |                          |                          |
| <b>pH dependence</b>                              |                    |                  |                   |                                               |                                           | <b>no</b>                                                |                          |                          |

a) Measured in H<sub>2</sub>O unless otherwise statedb) Normalised using a Q<sub>10</sub> of 2.58 and Walker equation coefficient of 0.7

c) From CGA37735

d) From ESA

e) From OXA

f) Meto mixture S- and R-isomer (r-isomer 0-50%)



| <b>NOA436611 (SYN546829)</b>                      |                      | Dark aerobic conditions |                |                                        |                                        |                                                     |                       |                       |
|---------------------------------------------------|----------------------|-------------------------|----------------|----------------------------------------|----------------------------------------|-----------------------------------------------------|-----------------------|-----------------------|
| Soil type                                         | Precursor            | pH <sup>a)</sup>        | t. °C / % MWHC | DT <sub>50</sub> /DT <sub>90</sub> (d) | f. f. k <sub>f</sub> / k <sub>dp</sub> | DT <sub>50</sub> (d) 20 °C pF2/10 kPa <sup>b)</sup> | St. (χ <sup>2</sup> ) | Method of calculation |
| Sandy clay loam (18 Acres)                        | S-meto <sup>c)</sup> | 5.7                     | 20, pF2        | 171 / 569                              | 0.08502                                | 160                                                 | 15.9                  | SFO                   |
| Sandy clay loam (18 Acres)                        | SYN546 829           | 6.5                     | 20, pF2-pF2.5  | 724 / > 1000                           | -                                      | 625                                                 | 1.9                   | SFO                   |
| Geometric mean 18 Acres                           |                      |                         |                |                                        |                                        | 316.2                                               |                       |                       |
| Loam (Gartenacker)                                | S-meto <sup>c)</sup> | 7.5                     | 20, pF2        | 89 / 296                               | 0.06858                                | 82.5                                                | 7.6                   | SFO                   |
| Silt loam (Gartenacker)                           | SYN546 829           | 7.6                     | 20, pF2-pF2.5  | 47.9 / 159                             | -                                      | 44.4                                                | 3.5                   | SFO                   |
| Geometric mean Gartenacker                        |                      |                         |                |                                        |                                        | 60.5                                                |                       |                       |
| Sandy loam (Lorsch)                               | S-meto <sup>c)</sup> | 5.2 (KCl)               | 20, 40 % MWHC  | 345 / >1000                            | 0.1304                                 | 227                                                 | 1.9                   | SFO                   |
|                                                   |                      |                         |                |                                        |                                        |                                                     |                       |                       |
| Silty clay (Marsillargues)                        | SYN546 829           | 8.0                     | 20, pF2-pF2.5  | 202 / 670                              | -                                      | 170                                                 | 2.7                   | SFO                   |
| <b>Geometric mean (if not pH dependent) (n=4)</b> |                      |                         |                |                                        |                                        | <b>164.9</b>                                        |                       |                       |
| <b>Arithmetic mean (n=3)</b>                      |                      |                         |                |                                        | <b>0.0947</b>                          |                                                     |                       |                       |
| <b>pH dependence</b>                              |                      |                         |                |                                        |                                        | <b>no</b>                                           |                       |                       |

<sup>a)</sup> Measured in H<sub>2</sub>O unless otherwise stated

<sup>b)</sup> Normalised using a Q<sub>10</sub> of 2.58 and Walker equation coefficient of 0.7

<sup>c)</sup> S-meto typically 99.4% CGA 77102

| <b>CGA357704</b>                                  |                      | Dark aerobic conditions |                |                                        |                                        |                                                     |                       |                       |
|---------------------------------------------------|----------------------|-------------------------|----------------|----------------------------------------|----------------------------------------|-----------------------------------------------------|-----------------------|-----------------------|
| Soil type                                         | Precursor            | pH <sup>a)</sup>        | t. °C / % MWHC | DT <sub>50</sub> /DT <sub>90</sub> (d) | f. f. k <sub>f</sub> / k <sub>dp</sub> | DT <sub>50</sub> (d) 20 °C pF2/10 kPa <sup>b)</sup> | St. (χ <sup>2</sup> ) | Method of calculation |
| Loamy sand (Neuhofen)                             | S-meto <sup>c)</sup> | 5.65                    | 20 /40%        | 1000                                   | 0.071                                  | 1000                                                | 13.0                  | SFO                   |
| Sandy loam (Weide)                                | S-meto <sup>c)</sup> | 7.6                     | 20 /40%        | 71.2                                   | 0.32                                   | 44.9                                                | 10.7                  | SFO                   |
| Sandy loam (Pappelacker)                          | S-meto <sup>c)</sup> | 7.6                     | 20 /40%        | 92.0                                   | 0.29                                   | 55.8                                                | 13.9                  | SFO                   |
| <b>Geometric mean (if not pH dependent) (n=3)</b> |                      |                         |                |                                        |                                        | <b>136</b>                                          |                       |                       |
| <b>Arithmetic mean (n=3)</b>                      |                      |                         |                |                                        | <b>0.22</b>                            |                                                     |                       |                       |
| <b>pH dependence</b>                              |                      |                         |                |                                        |                                        | <b>no</b>                                           |                       |                       |

<sup>a)</sup> Measured in H<sub>2</sub>O

<sup>b)</sup> Normalised using a Q<sub>10</sub> of 2.58 and Walker equation coefficient of 0.7

c) S-meto typically 99.4% CGA 77102

| <b>SYN547977</b> Dark aerobic conditions          |            |                  |                |                                        |                                        |                                                     |                       |                       |
|---------------------------------------------------|------------|------------------|----------------|----------------------------------------|----------------------------------------|-----------------------------------------------------|-----------------------|-----------------------|
| Soil type                                         | Precursor  | pH <sup>a)</sup> | t. °C / % MWHC | DT <sub>50</sub> /DT <sub>90</sub> (d) | f. f. k <sub>f</sub> / k <sub>dp</sub> | DT <sub>50</sub> (d) 20 °C pF2/10 kPa <sup>b)</sup> | St. (χ <sup>2</sup> ) | Method of calculation |
| Silt loam (Gartenacker)                           | SYN547 977 | 7.53             | 20.7 / pF2     | 36.9 / 123                             | -                                      | 39.4                                                | 3.96                  | SFO                   |
| Sandy clay loam (18 Acres)                        | SYN547 977 | 6.36             | 20.7 / pF2     | 65.6 / 218                             | -                                      | 70.1                                                | 4.7                   | SFO                   |
| Silty clay loam (Marsillargues)                   | SYN547 977 | 8.14             | 20.7 / pF2     | 86 / 286                               | -                                      | 95.1                                                | 3.63                  | SFO                   |
| <b>Geometric mean (if not pH dependent) (n=3)</b> |            |                  |                |                                        |                                        | <b>64.0</b>                                         |                       |                       |
| <b>pH dependence</b>                              |            |                  |                |                                        |                                        | <b>no</b>                                           |                       |                       |

a) Measured in H<sub>2</sub>O

b) Normalised using a Q<sub>10</sub> of 2.58 and Walker equation coefficient of 0.7

| <b>CGA41507</b> (anaerobic soil metabolite) Dark aerobic conditions |           |                  |                |                                        |                                        |                                                     |                       |                       |
|---------------------------------------------------------------------|-----------|------------------|----------------|----------------------------------------|----------------------------------------|-----------------------------------------------------|-----------------------|-----------------------|
| Soil type                                                           | Precursor | pH <sup>a)</sup> | t. °C / % MWHC | DT <sub>50</sub> /DT <sub>90</sub> (d) | f. f. k <sub>f</sub> / k <sub>dp</sub> | DT <sub>50</sub> (d) 20 °C pF2/10 kPa <sup>b)</sup> | St. (χ <sup>2</sup> ) | Method of calculation |
| Silt loam (Gartenacker)                                             | CGA41507  | 7.3              | 20, 40 % MWHC  | 51.5 / 171                             | -                                      | 51.0                                                | 4.7                   | SFO                   |
| <b>Single value</b>                                                 |           |                  |                |                                        |                                        | <b>51</b>                                           |                       |                       |

a) Measured in KCl

b) Normalised using a Q<sub>10</sub> of 2.58 and Walker equation coefficient of 0.7

c) S-meto typically 99.4% CGA77102

**Rate of degradation field soil dissipation studies (Regulation (EU) N° 283/2013, Annex Part A, point 7.1.2.2.1 and Regulation (EU) N° 284/2013, Annex Part A, point 9.1.1.2.1)**

| <b>Parent (S-metolachlor, CGA77102)</b> Aerobic conditions |                                  |                                       |                   |            |                             |                             |                       |                            |                                           |
|------------------------------------------------------------|----------------------------------|---------------------------------------|-------------------|------------|-----------------------------|-----------------------------|-----------------------|----------------------------|-------------------------------------------|
| Soil type (indicate if bare or cropped soil was used).     | Location (country or USA state). | Precursor                             | pH                | Depth (cm) | DT <sub>50</sub> (d) actual | DT <sub>90</sub> (d) actual | St. (χ <sup>2</sup> ) | DT <sub>50</sub> (d) Norm. | Method of calculation                     |
| Silt loam (bare)                                           | Germany                          | S-metolachlor (80:20 S:R metolachlor) | 6.5 <sup>a)</sup> | 0-30       | 24.1                        | 183                         | 6.28                  | NA                         | FOMC<br>α: 1.171<br>β: 29.84              |
| Sandy loam (bare)                                          | Switzerland                      | S-metolachlor (80:20 S:R metolachlor) | 7.4 <sup>a)</sup> | 0-30       | 3.55                        | 50.4                        | 4.77                  | NA                         | HS<br>k1:0.1954<br>k2:0.0278<br>tb: 5.378 |

**Rate of degradation field soil dissipation studies (Regulation (EU) N° 283/2013, Annex Part A, point 7.1.2.1 and Regulation (EU) N° 284/2013, Annex Part A, point 9.1.1.2.1)**

| Parent<br>(S-metolachlor,<br>CGA77102) | Aerobic conditions                                              |                                             |                    |      |               |                                |                                |                     |                                               |
|----------------------------------------|-----------------------------------------------------------------|---------------------------------------------|--------------------|------|---------------|--------------------------------|--------------------------------|---------------------|-----------------------------------------------|
|                                        | Soil type<br>(indicate if bare<br>or cropped soil<br>was used). | Location<br>(country or<br>USA<br>state).   | Precursor          | pH   | Depth<br>(cm) | DT <sub>50</sub> (d)<br>actual | DT <sub>90</sub> (d)<br>actual | St.<br>( $\chi^2$ ) | DT <sub>50</sub> (d)<br>Norm.                 |
| Sandy loam<br>(maize cover)            | Switzerland                                                     | S-metolachlor<br>(80:20 S:R<br>metolachlor) | 7.5 <sup>a)</sup>  | 0-30 | 22.9          | 76.1                           | 3.79                           | NA                  | SFO                                           |
| Silt loam (bare)                       | Switzerland                                                     | S-metolachlor<br>(80:20 S:R<br>metolachlor) | 7.9 <sup>a)</sup>  | 0-30 | 18.6          | 61.9                           | 1.65                           | NA                  | SFO                                           |
| Sandy loam<br>(maize cover)            | Switzerland                                                     | S-metolachlor<br>(80:20 S:R<br>metolachlor) | 7.8 <sup>a)</sup>  | 0-30 | 11.4          | 37.9                           | 1.96                           | NA                  | SFO                                           |
| Loam (bare)                            | France                                                          | S-metolachlor<br>(80:20 S:R<br>metolachlor) | 7.15 <sup>a)</sup> | 0-30 | 30.8          | 102                            | 4.45                           | NA                  | SFO                                           |
| Silt clay loam<br>(bare)               | France                                                          | S-metolachlor<br>(80:20 S:R<br>metolachlor) | 7.45 <sup>a)</sup> | 0-30 | 12.8          | 256                            | 21.7                           | NA                  | DFOP<br>k1:0.07173<br>k2:0.00217<br>g: 0.8257 |
| Silty sand (bare)                      | Germany                                                         | S-metolachlor<br>(80:20 S:R<br>metolachlor) | 6.1 <sup>a)</sup>  | 0-30 | 26.1          | 86.8                           | 11.7                           | NA                  | SFO                                           |
| Loamy silt (bare)                      | Germany                                                         | S-metolachlor<br>(80:20 S:R<br>metolachlor) | 7.4 <sup>a)</sup>  | 0-30 | 4.62          | 27.6                           | 10.7                           | NA                  | FOMC<br>$\alpha$ : 1.589<br>$\beta$ : 8.458   |
| Silt loam (bare)                       | Italy                                                           | S-metolachlor<br>(80:20 S:R<br>metolachlor) | 7.6 <sup>b)</sup>  | 0-20 | 43.9          | 146                            | 13                             | NA                  | SFO                                           |
| Clay loam (bare)                       | France                                                          | S-metolachlor<br>(80:20 S:R<br>metolachlor) | 7.3 <sup>b)</sup>  | 0-30 | 21            | 69.9                           | 15                             | NA                  | SFO                                           |
| Sandy loam<br>(bare)                   | Germany                                                         | Metolachlor<br>(50:50 S:R<br>metolachlor)   | 6.2 <sup>a)</sup>  | 0-20 | 17.2          | 244                            | 5.29                           | NA                  | DFOP<br>k1: p<0.01<br>k2: p=0.05              |
| Clayey silt (bare)                     | Germany                                                         | Metolachlor<br>(50:50 S:R<br>metolachlor)   | 6.2 <sup>a)</sup>  | 0-20 | 7.95          | 55.6                           | 8.10                           | NA                  | DFOP<br>k1:p=0.5<br>k2:p<0.01                 |
| Loamy sand<br>(bare)                   | Germany                                                         | Metolachlor<br>(50:50 S:R<br>metolachlor)   | 6.0 <sup>a)</sup>  | 0-20 | 38.2          | 127                            | 6.0                            | NA                  | SFO                                           |

**Rate of degradation field soil dissipation studies (Regulation (EU) N° 283/2013, Annex Part A, point 7.1.2.2.1 and Regulation (EU) N° 284/2013, Annex Part A, point 9.1.1.2.1)**

| Parent<br>(S-metolachlor,<br>CGA77102)                          | Aerobic conditions                        |                                           |                   |               |                                |                                |                     |                               |                                 |
|-----------------------------------------------------------------|-------------------------------------------|-------------------------------------------|-------------------|---------------|--------------------------------|--------------------------------|---------------------|-------------------------------|---------------------------------|
| Soil type<br>(indicate if bare<br>or cropped soil<br>was used). | Location<br>(country or<br>USA<br>state). | Precursor                                 | pH                | Depth<br>(cm) | DT <sub>50</sub> (d)<br>actual | DT <sub>90</sub> (d)<br>actual | St.<br>( $\chi^2$ ) | DT <sub>50</sub> (d)<br>Norm. | Method<br>of<br>calculatio<br>n |
| Loamy silt (bare)                                               | Germany                                   | Metolachlor<br>(50:50 S:R<br>metolachlor) | 6.0 <sup>a)</sup> | 0-20          | 24.1                           | 80.1                           | 9.37                | NA                            | SFO                             |
| Sandy silt loam<br>(bare)                                       | Germany                                   | Metolachlor<br>(50:50 S:R<br>metolachlor) | 5.7 <sup>a)</sup> | 0-20          | 31.3                           | 104                            | 21.1                | NA                            | SFO                             |
| Silty sand (bare)                                               | Germany                                   | Metolachlor<br>(50:50 S:R<br>metolachlor) | 4.8 <sup>a)</sup> | 0-20          | 55.7                           | 185                            | 7.37                | NA                            | SFO                             |
| <b>Maximum non-normalised field DT<sub>50</sub></b>             |                                           |                                           |                   |               | <b>55.7</b>                    |                                |                     |                               | <b>SFO</b>                      |
| <b>Maximum non-normalised field DT<sub>90</sub></b>             |                                           |                                           |                   |               | <b>-</b>                       | <b>256</b>                     | <b>-</b>            | <b>-</b>                      | <b>DFOP</b>                     |

<sup>a)</sup> Medium not stated

<sup>b)</sup> Measured in CaCl<sub>2</sub>

**Data gap:** field dissipation studies providing kinetic endpoints for metabolites CGA 357704, CGA 368208, CGA 40172 and NOA 436611

**Soil accumulation (Regulation (EU) N° 283/2013, Annex Part A, point 7.1.2.2.2 and Regulation (EU) N° 284/2013, Annex Part A, point 9.1.1.2.2)**

Soil accumulation and plateau concentration

|                                                                                                                                                                                                                           |
|---------------------------------------------------------------------------------------------------------------------------------------------------------------------------------------------------------------------------|
| <p>Studies with Sugar Beet crop:<br/>Application between 1.44 – 1.47 kg a.s./ha in field studies.<br/>No accumulation of S-metolachlor, CGA35196 or CGA51202 in the top soil at the end of the investigation periods.</p> |
| <p>Studies with Sunflower crop:<br/>Application of 1.68 kg a.s./ha in field studies.<br/>No accumulation of S-metolachlor, CGA35196 or CGA51202 in the top soil at the end of the investigation periods.</p>              |
| <p>Studies with Maize crop:<br/>Application between 2.12 – 2.16 kg a.s./ha in field studies.<br/>No accumulation of S-metolachlor, CGA35196 or CGA51202 in the top soil at the end of the investigation periods.</p>      |

**Soil accumulation (Regulation (EU) N° 283/2013, Annex Part A, point 7.1.2.2 and Regulation (EU) N° 284/2013, Annex Part A, point 9.1.1.2)**

|                                                                                                                                                                                                                                                                                                      |
|------------------------------------------------------------------------------------------------------------------------------------------------------------------------------------------------------------------------------------------------------------------------------------------------------|
| <p>Studies with Soya bean crop:<br/>Application of 1.20 kg a.s./ha in field studies.<br/>No accumulation of S-metolachlor, CGA35196 or CGA51202 in the top soil at the end of the investigation periods.</p>                                                                                         |
| <p>Study with maize crop:<br/>Annual application between 1.5 – 3 kg a.s./ha in field studies. (combi-formulation metolachlor with atrazine, target crop maize rotational crop wheat)<br/>No accumulation of S-metolachlor, CGA35196 or CGA51202 in the top soil at the end of the 4 year period.</p> |
| <p>Study with maize crop:<br/>Annual application between 2 - 4 kg a.s./ha in field studies. (target crop maize, rotational crops sugar beets or winter wheat)<br/>No accumulation of S-metolachlor, CGA35196 or CGA51202 in the top soil at the end of the 4 year period.</p>                        |

**Rate of degradation in soil (anaerobic) laboratory studies active substance (Regulation (EU) N° 283/2013, Annex Part A, point 7.1.2.1.3 and Regulation (EU) N° 284/2013, Annex Part A, point 9.1.1.1)**

|        |                             |
|--------|-----------------------------|
| Parent | Dark anaerobic conditions   |
|        | DT <sub>90</sub> < 120 days |

**Rate of degradation in soil (anaerobic) laboratory studies transformation products (Regulation (EU) N° 283/2013, Annex Part A, point 7.1.2.1.4 and Regulation (EU) N° 284/2013, Annex Part A, point 9.1.1.1)**

|                        |                             |
|------------------------|-----------------------------|
| Metabolite<br>CGA41507 | Dark anaerobic conditions   |
|                        | DT <sub>90</sub> < 120 days |

**Rate of degradation on soil (photolysis) laboratory active substance (Regulation (EU) N° 283/2013, Annex Part A, point 7.1.1.3)**

| Parent                 | Soil photolysis  |                     |                                                                   |                          |                       |
|------------------------|------------------|---------------------|-------------------------------------------------------------------|--------------------------|-----------------------|
| Soil type              | pH <sup>a)</sup> | t. °C / % MWHC      | DT <sub>50</sub> / DT <sub>90</sub> (d)<br>calculated at 30-50 °N | St.<br>(χ <sup>2</sup> ) | Method of calculation |
| Loamy sand, dry soil   | 5.3              | 20 / not applicable | 126 / 418                                                         | 2.6                      | SFO                   |
| Loamy sand, moist soil | 5.3              | 20 / pF2            | 78.5 / 261                                                        | 1.1                      | SFO                   |

<sup>a)</sup> Measured in water

**Soil adsorption active substance (Regulation (EU) N° 283/2013, Annex Part A, point 7.1.3.1.1 and Regulation (EU) N° 284/2013, Annex Part A, point 9.1.2.1)**

| Parent (S-metolachlor, CGA77102)   |             |                    |                          |                            |        |
|------------------------------------|-------------|--------------------|--------------------------|----------------------------|--------|
| Soil Type                          | OC %        | Soil pH            | K <sub>F</sub><br>(mL/g) | K <sub>Foc</sub><br>(mL/g) | 1/n    |
| Leland Mississippi (clay)          | 1.276       | 7.2 <sup>a)</sup>  | 4.7                      | 368                        | 0.934  |
| Lime Kiln Maryland (sandy loam)    | 1.160       | 8.0 <sup>a)</sup>  | 1.4                      | 121                        | 0.909  |
| Middletown Maryland (silt loam)    | 0.986       | 7.0 <sup>a)</sup>  | 1.1                      | 112                        | 0.914  |
| Collombey (loamy sand)             | 0.8         | 7.3 <sup>c)</sup>  | 1.4                      | 175                        | 0.909  |
| Speyer 2.1 (sand)                  | 0.3         | 6.8 <sup>c)</sup>  | 1.0                      | 333                        | 0.887  |
| Gartenacker (silt loam)            | 2.0         | 7.1 <sup>c)</sup>  | 4.6                      | 230                        | 0.971  |
| Vetroz (silt loam)                 | 4.7         | 7.2 <sup>c)</sup>  | 11.5                     | 245                        | 1.002  |
| Illarsaz (humic silt loam)         | 19.8        | 6.7 <sup>c)</sup>  | 44.8                     | 226                        | 0.926  |
| Bahus 1 0-10cm (silt loam)         | 5.91        | 3.42 <sup>b)</sup> | 10.82                    | 183                        | 0.927  |
| Bahus 2 10-20cm (silt loam)        | 3.02        | 3.75 <sup>b)</sup> | 7.63                     | 253                        | 0.925  |
| Birkenheide, (loamy sand)          | 0.65        | 3.42 <sup>b)</sup> | 1.09                     | 168                        | 0.952  |
| Soil Lorsch Horizon I (sandy loam) | 1.63        | 5.17 <sup>b)</sup> | 2.37                     | 145                        | 0.9629 |
| <b>Geometric mean (n = 12)</b>     | <b>3.63</b> | <b>200.24</b>      |                          |                            |        |
| <b>Arithmetic mean (n = 12)</b>    |             |                    | <b>0.935</b>             |                            |        |
| <b>pH dependence</b>               |             |                    | <b>no</b>                |                            |        |
|                                    |             |                    |                          |                            |        |
|                                    |             |                    |                          |                            |        |

<sup>a)</sup> Measured in CaCl<sub>2</sub>

<sup>b)</sup> Measured in KCl

<sup>c)</sup> Medium in which the pH measurements were performed is not reported in study

**Metabolite ESA (CGA376944, (CGA376943 S-enantiomer, CGA380168 ascribed to its sodium salt)**

| Soil Type                      | OC %  | Soil pH            | K <sub>F</sub><br>(mL/g) | K <sub>Foc</sub><br>(mL/g) | 1/n          |
|--------------------------------|-------|--------------------|--------------------------|----------------------------|--------------|
| Vetroz (silt loam)             | 4.7   | 7.2 <sup>c)</sup>  | 0.5                      | 11                         | 0.91         |
| Gartenacker (loam)             | 2.08  | 7.32 <sup>c)</sup> | 0.21                     | 10                         | 0.9          |
| Neunhofen (loamy sand)         | 2.2   | 5.65 <sup>c)</sup> | 0.2                      | 9                          | 0.89         |
| Lime Kiln (sandy loam)         | 1.276 | 7.7 <sup>c)</sup>  | 0.041                    | 3                          | 0.955        |
| Burtonsville (loamy sand)      | 0.348 | 5.9 <sup>c)</sup>  | 0.007                    | 2                          | 0.785        |
| Middletown (loam)              | 2.146 | 7.2 <sup>c)</sup>  | 0.1                      | 5                          | 0.909        |
| Leland (clay)                  | 1.392 | 6.5 <sup>c)</sup>  | 0.3                      | 22                         | 0.962        |
| <b>Geometric mean (n = 7)</b>  |       |                    | <b>0.11</b>              | <b>6.74</b>                |              |
| <b>Arithmetic mean (n = 7)</b> |       |                    |                          |                            | <b>0.902</b> |
| <b>pH dependence</b>           |       |                    | <b>no</b>                |                            |              |

<sup>a)</sup> Measured in CaCl<sub>2</sub>

<sup>b)</sup> Measured in KCl

<sup>c)</sup> Medium in which the pH measurements were performed is not reported in study.

**Metabolite OXA (CGA51202)**

| Soil Type                      | OC % | Soil pH           | K <sub>F</sub><br>(mL/g) | K <sub>Foc</sub><br>(mL/g) | 1/n          |
|--------------------------------|------|-------------------|--------------------------|----------------------------|--------------|
| Maryland (clay)                | 2.8  | 5.9 <sup>c)</sup> | 0.065                    | 2                          | 1.026        |
| Mississippi (loam)             | 0.7  | 7.6 <sup>c)</sup> | 0.083                    | 12                         | 0.715        |
| Iowa (sand)                    | 2.9  | 5.9 <sup>c)</sup> | 0.169                    | 6                          | 0.895        |
| Collombey (loamy sand)         | 0.76 | 7 <sup>c)</sup>   | 0.48                     | 63                         | 0.874        |
| Les Evouettes (silt loam)      | 2.1  | 7.3 <sup>c)</sup> | 0.48                     | 23                         | 0.758        |
| Vetroz (silt loam)             | 4.4  | 7.1 <sup>c)</sup> | 0.67                     | 15                         | 0.811        |
| <b>Geometric mean (n = 6)</b>  |      |                   | <b>0.23</b>              | <b>12.34</b>               |              |
| <b>Arithmetic mean (n = 6)</b> |      |                   |                          |                            | <b>0.846</b> |
| <b>pH dependence</b>           |      |                   | <b>no</b>                |                            |              |

<sup>a)</sup> Measured in CaCl<sub>2</sub>

<sup>b)</sup> Measured in KCl

<sup>c)</sup> Medium in which the pH measurements were performed is not reported in study.

### Soil adsorption transformation products (Regulation (EU) N° 283/2013, Annex Part A, point 7.1.3.1.2 and Regulation (EU) N° 284/2013, Annex Part A, point 9.1.2.1)

| <b>Metabolite CGA40172</b>     |      |                   |                          |                            |             |
|--------------------------------|------|-------------------|--------------------------|----------------------------|-------------|
| Soil Type                      | OC % | Soil pH           | K <sub>F</sub><br>(mL/g) | K <sub>Foc</sub><br>(mL/g) | 1/n         |
| Collombey (loamy sand)         | 0.76 | 7.0 <sup>c)</sup> | 1.39                     | 182                        | 0.7157      |
| Les Evouettes (silt loam)      | 2.1  | 7.3 <sup>c)</sup> | 4.29                     | 204                        | 0.6978      |
| Vetroz (silt loam)             | 4.39 | 7.1 <sup>c)</sup> | 6.30                     | 143                        | 0.8800      |
| <b>Geometric mean (n = 3)</b>  |      |                   | <b>3.35</b>              | <b>174.45</b>              |             |
| <b>Arithmetic mean (n = 3)</b> |      |                   |                          |                            | <b>0.76</b> |
| <b>pH dependence</b>           |      |                   | <b>no</b>                |                            |             |

<sup>a)</sup> Measured in CaCl<sub>2</sub>

<sup>b)</sup> Measured in KCl

<sup>c)</sup> Medium in which the pH measurements were performed is not reported in study

| <b>Metabolite CGA41507</b>                   |      |                    |                          |                            |             |
|----------------------------------------------|------|--------------------|--------------------------|----------------------------|-------------|
| Soil Type                                    | OC % | Soil pH            | K <sub>F</sub><br>(mL/g) | K <sub>Foc</sub><br>(mL/g) | 1/n         |
| Collombey (loamy sand)                       | 2.00 | 7.60 <sup>b)</sup> | 1.88                     | 93.82                      | 0.8703      |
| Les Evouettes (silt loam)                    | 2.40 | 7.20 <sup>b)</sup> | 1.95                     | 81.31                      | 0.8424      |
| Vetroz (silt loam)                           | 4.70 | 7.20 <sup>b)</sup> | 3.99                     | 84.92                      | 0.9128      |
| <b>Geometric mean (n = 3)</b>                |      |                    | <b>2.45</b>              | <b>86.53</b>               |             |
| <b>Arithmetic mean (if not pH dependent)</b> |      |                    |                          |                            | <b>0.88</b> |
| <b>pH dependence</b>                         |      |                    | <b>no</b>                |                            |             |

<sup>a)</sup> Measured in CaCl<sub>2</sub>

<sup>b)</sup> Measured in KCl

<sup>c)</sup> Medium in which the pH measurements were performed is not reported in study

| <b>Metabolite CGA357704</b>    |      |         |                          |                            |          |
|--------------------------------|------|---------|--------------------------|----------------------------|----------|
| Soil Type                      | OC % | Soil pH | K <sub>F</sub><br>(mL/g) | K <sub>Foc</sub><br>(mL/g) | 1/n      |
| Collombey (loam sand)          | 2.00 | 7.60    | -                        | 1*                         | 1*       |
| Les Evouttes (silt loam)       | 2.40 | 7.20    | -                        | 1*                         | 1*       |
| Vetroz (silt loam)             | 4.05 | 7.30    | -                        | 1*                         | 1*       |
| <b>Geometric mean (n = 3)</b>  |      |         | <b>-</b>                 | <b>1</b>                   |          |
| <b>Arithmetic mean (n = 3)</b> |      |         | <b>-</b>                 |                            | <b>1</b> |
| <b>pH dependence</b>           |      |         | <b>no</b>                |                            |          |

\* No advanced adsorption study, therefore use of default values

| <b>Metabolite NOA436611 (SYN546829 test substance used is racemic NOA436611)</b> |      |                   |                       |                         |              |
|----------------------------------------------------------------------------------|------|-------------------|-----------------------|-------------------------|--------------|
| Soil Type                                                                        | OC % | Soil pH           | K <sub>F</sub> (mL/g) | K <sub>Foc</sub> (mL/g) | 1/n          |
| Seven Springs (loamy sand)                                                       | 0.7  | 5.4 <sup>a)</sup> | 0.008                 | 11                      | 0.829        |
| Marsillargues (silty clay)                                                       | 1    | 7.7 <sup>a)</sup> | 0.06                  | 6                       | 0.742        |
| Louisville (silty clay loam)                                                     | 1.7  | 6.2 <sup>a)</sup> | 0.25                  | 15                      | 0.872        |
| 18 acres (sandy clay loam)                                                       | 2.8  | 6.1 <sup>a)</sup> | 0.14                  | 5                       | 0.853        |
| <b>Geometric mean (n = 4)</b>                                                    |      |                   | <b>0.11</b>           | <b>8.43</b>             |              |
| <b>Arithmetic mean (n = 4)</b>                                                   |      |                   |                       |                         | <b>0.824</b> |
| <b>pH dependence</b>                                                             |      |                   | <b>no</b>             |                         |              |

<sup>a)</sup> Measured in CaCl<sub>2</sub>

<sup>b)</sup> Measured in KCl

<sup>c)</sup> Medium in which the pH measurements were performed is not reported in study.

| <b>Metabolite CGA37735</b>     |      |                   |                       |                         |              |
|--------------------------------|------|-------------------|-----------------------|-------------------------|--------------|
| Soil Type                      | OC % | Soil pH           | K <sub>F</sub> (mL/g) | K <sub>Foc</sub> (mL/g) | 1/n          |
| Seven Springs (loamy sand)     | 0.7  | 5.4 <sup>a)</sup> | 0.15                  | 21                      | 0.948        |
| Marsillargues (silty clay)     | 1    | 7.7 <sup>a)</sup> | 0.12                  | 12                      | 0.948        |
| Louisville (clay loam)         | 1.7  | 6.2 <sup>a)</sup> | 0.25                  | 15                      | 0.934        |
| 18 acres (sandy clay loam)     | 2.8  | 6.1 <sup>a)</sup> | 0.16                  | 6                       | 1.004        |
| Gartenacker (silt loam)        | 2    | 7.3 <sup>a)</sup> | 0.11                  | 6                       | 0.968        |
| <b>Geometric mean (n = 6)</b>  |      |                   | <b>0.15</b>           | <b>10.35</b>            |              |
| <b>Arithmetic mean (n = 6)</b> |      |                   |                       |                         | <b>0.964</b> |
| <b>pH dependence</b>           |      |                   |                       |                         |              |

<sup>a)</sup> Measured in CaCl<sub>2</sub>

<sup>b)</sup> Measured in KCl

<sup>c)</sup> Medium in which the pH measurements were performed is not reported in study.

| <b>Metabolite SYN542607</b>    |      |                   |                       |                         |              |
|--------------------------------|------|-------------------|-----------------------|-------------------------|--------------|
| Soil Type                      | OC % | Soil pH           | K <sub>F</sub> (mL/g) | K <sub>Foc</sub> (mL/g) | 1/n          |
| Seven Springs (loamy sand)     | 0.7  | 5.4 <sup>a)</sup> | 0.02                  | 3                       | 0.875        |
| Louisville (clay loam)         | 1.7  | 6.5 <sup>a)</sup> | 0.07                  | 4                       | 0.930        |
| 18 acres (sandy clay loam)     | 2.8  | 6.1 <sup>a)</sup> | 0.02                  | 1                       | 0.829        |
| <b>Geometric mean (n = 3)</b>  |      |                   | <b>0.03</b>           | <b>1.9</b>              |              |
| <b>Arithmetic mean (n = 3)</b> |      |                   |                       |                         | <b>0.878</b> |
| <b>pH dependence</b>           |      |                   |                       |                         |              |

<sup>a)</sup> Measured in CaCl<sub>2</sub>

<sup>b)</sup> Measured in KCl

<sup>c)</sup> Medium in which the pH measurements were performed is not reported in study.

| <b>Metabolite SYN547977</b>    |      |                    |                       |                         |             |
|--------------------------------|------|--------------------|-----------------------|-------------------------|-------------|
| Soil Type                      | OC % | Soil pH            | K <sub>F</sub> (mL/g) | K <sub>Foc</sub> (mL/g) | 1/n         |
| 18 Ares                        | 2.78 | 5.61 <sup>a)</sup> | 1.78                  | 64.2                    | 0.931       |
| Gartenacker                    | 2.35 | 6.99 <sup>a)</sup> | 1.03                  | 43.9                    | 0.918       |
| Marsillargues                  | 1.04 | 7.99 <sup>a)</sup> | 0.83                  | 80.2                    | 0.926       |
| <b>Geometric mean (n = 3)</b>  |      |                    | <b>1.15</b>           | <b>60.9</b>             |             |
| <b>Arithmetic mean (n = 3)</b> |      |                    |                       |                         | <b>0.93</b> |
| <b>pH dependence, No</b>       |      |                    |                       |                         |             |

<sup>a)</sup> Measured in CaCl<sub>2</sub>



| Metabolites without any advanced sorption studies |                          |                            |     |
|---------------------------------------------------|--------------------------|----------------------------|-----|
|                                                   | K <sub>F</sub><br>(mL/g) | K <sub>Foc</sub><br>(mL/g) | 1/n |
| CGA368208                                         | 1*                       | 1*                         | 1*  |
| CGA50720                                          | 1*                       | 1*                         | 1*  |

\*default values, conservative assumption

**Mobility in soil column leaching active substance (Regulation (EU) N° 283/2013, Annex Part A, point 7.1.4.1.1 and Regulation (EU) N° 284/2013, Annex Part A, point 9.1.2.1)**

Column leaching

(1) Aged leaching 7-33 days, 4 soils, elution (mm): 508 mm, Time period (d): 2 d  
 (2) Aged leaching 19 days, 2 soils, elution (mm): 200 mm, Time period (d): 2 d  
 (3) Aged leaching 28 days, 1 soil, elution (mm): 200 mm, Time period (d): 2 d

Leachate (% applied radioactivity):

(1) total residues: 7.5-16.5 %  
 a.s.: 0.2-36.3 %  
 (2) total residues: 19.1 %  
 a.s.: < 0.01 %  
 (3) total residues: 33.1-33.9 %  
 a.s.: < 0.01 %

**Mobility in soil column leaching transformation products (Regulation (EU) N° 283/2013, Annex Part A, point 7.1.4.1.2 and Regulation (EU) N° 284/2013, Annex Part A, point 9.1.2.1)**

Column leaching

(1) Aged leaching 7-33 days, 4 soils, elution (mm): 508 mm, Time period (d): 2 d  
 (2) Aged leaching 19 days, 2 soils, elution (mm): 200 mm, Time period (d): 2 d  
 (3) Aged leaching 28 days, 1 soil, elution (mm): 200 mm, Time period (d): 2 d

Leachate (% of applied radioactivity):

(1) CGA51202: 5.5-11.0 %  
 CGA 50720: 1.1-6.9 %  
 (2) CGA51202: 8.3-11.3 %  
 CGA 50720: 3.5-5.9 %  
 (3) CGA51202: 6.3-6.9 %  
 CGA 354743: 12.1-12.6 %

**Lysimeter / field leaching studies (Regulation (EU) N° 283/2013, Annex Part A, points 7.1.4.2 / 7.1.4.3 and Regulation (EU) N° 284/2013, Annex Part A, points 9.1.2.2 / 9.1.2.3)**

Field leaching studies

(1) Location: Lorsch, Hessen, Germany  
Study type: Field leaching  
Soil properties: pH = ca. 5.2-8, OC= < 0.5-2.6 %  
Dates of application and application rate:  
23.05.1995: 1454 g a.s./ha  
03.06.1996: 1491 g a.s./ha  
27/28.05.1997: 1499 g a.s./ha  
26.05.1999: 1495 g a.s./ha  
23.05.2000: 1499 g a.s./ha  
24.05.2002: 1241 g a.s./ha  
24.05.2003: 1250 g a.s./ha  
Crop: Maize  
Interception: 0 % (pre-emergence)  
Number of applications per year: 1  
Duration: 10 years  
Average annual rainfall (mm): ca. 407-964 mm

(2) Location: Sherburne County, Minnesota, USA  
Study type: Field leaching  
Soil properties: pH = ca. 6, OC= < 2 %  
Dates of application: 29.05.1996  
Application rate: 3000 g/ha.  
Crop: Maize  
Interception: 0 % (pre-emergence)  
Number of applications: 1  
Duration: 4 years  
Average annual rainfall (mm): ca. 500-600 mm

For results of the field leaching studies please refer to the PEC<sub>GW</sub>-section of this LoEP.

Lysimeter studies

(1) Location: Birkenheide, Rhineland Palatinate, Germany  
Study type: lysimeter  
Soil properties: loamy sand (pH = 6.4, OC = 1.3 %)  
Dates of application:  
1st year (both lysimeter): 24/05/95;  
2nd year (lysimeter 18): 04/06/96  
Crop: maize, winter cereals,  
Interception estimated: 25 %  
Number of applications: 1 application per year  
Duration: 3 years  
Application rate: 1250 g/ha/year  
Average annual rainfall (mm): 807 - 923  
Average annual leachate volume (mm): 114.5 – 223.9

Radioactivity in leachate - individual annual maximum concentrations expressed as µg a.s. equivalents /L:

S-metolachlor: < 0.01 - 0.08  
CGA354743 (ESA): 1.1 - 28  
CGA51202 (OXA): 0.3 - 16.3  
CGA368208: 0.05 - 7.8  
CGA50720: 0.03 - 4.7  
CGA357704: 0.07 - 5.1  
CGA37735: 0.16 - 0.98  
unidentified radioactivity: 5.1 – 47.2

(2) Location: Stein/Argau, Switzerland

Study type: lysimeter

Soil properties: sandy soil (pH = 5.6, OC=1.7 %)

Dates of application: 06 May 2002 (all soil cores), 08 May 2003 (soil core 3 and 4)

Crop: maize

Interception estimated: 0 %

Number of applications: 1 application per year

Duration: 3 years

Application rate: 1500 g/ha/year

Average annual rainfall (mm): 759 - 884

Average annual leachate volume (mm): 328 – 502

Individual max. annual average concentrations in leachate expressed as µg a.s. equivalents /L:

S-metolachlor: not detected

CGA354743 (ESA): 2.0 - 32.5

CGA51202 (OXA): 1.1 - 26.5

CGA368208: 0.1 - 5.0

CGA50720: 0.1 – 1.1

CGA357704: 0.1 – 6.1

NOA436611: 0.1- 2.8

NOA413173: 0.3 – 4.2

SYN542489: 0.1 – 4.2

SYN542488: 0.1 – 1.7

SYN542490: 0.1 – 3.5

SYN542491: 0.5 – 3.2

SYN542492: 0.2 – 2.1

SYN542607: 0.1 – 1.2

SYN545026: 0.1 – 1.7

SYN545027: 0.5 – 2.4

Overall summary of definitively identified metabolites in the leachate of lysimeter 3, year 2 (lysimeter with highest annual mean <sup>14</sup>C- concentration) expressed as µg a.s. equivalents /L:

CGA354743 (ESA): 29.3

CGA51202 (OXA): 24.1

CGA368208: 2.4

CGA357704: 5.3

NOA436611: 1.8

NOA413173: 3.0

SYN542489: 5.1

SYN542488: 0.8

SYN542490: 3.1

SYN542491: 1.2

SYN542492: 1.7

SYN542607: 2.4

SYN547969: 2.0

SYN547977: 0.1

Total definitively identified metabolites: 82.2  
(=76.6 % of total radioactivity in the leachate)

minor metabolites: 9.3 (= 8.7 % of total radioactivity in the leachate)

biogenic compounds: 15.8 (= 14.7 % of total radioactivity in the leachate)

Overall total <sup>14</sup>C-radioactivity: 107.3

**Hydrolytic degradation (Regulation (EU) N° 283/2013, Annex Part A, point 7.2.1.1)**

Hydrolytic degradation of the active substance and metabolites > 10 %

pH 5 at 25 °C: no degradation within 30 d

pH 7 at 25 °C: no degradation within 30 d

pH 9 at 25 °C: no degradation within 30 d

**Aqueous photochemical degradation (Regulation (EU) N° 283/2013, Annex Part A, points 7.2.1.2 / 7.2.1.3)**

Photolytic degradation of active substance and metabolites above 10 %

**pH 7, sterile buffer**

S-metolachlor dosed

DT<sub>50</sub>: 146 days

Natural light, 30° - 50 °N; DT<sub>50</sub>:129 days

**Sterile natural water**

Metolachlor dosed

DT<sub>50</sub>: 12.1 d

Natural summer sunlight, 30° - 50 °N, DT<sub>50</sub>: 21.5d

45 degradates, none of them > 5.5% of applied <sup>14</sup>C

Quantum yield of direct phototransformation in water at Σ > 290 nm

Not relevant,

molar absorptivity at wave lengths ≥ 290 nm:  
< 10 L·mol<sup>-1</sup>·cm<sup>-1</sup>

**‘Ready biodegradability’ (Regulation (EU) N° 283/2013, Annex Part A, point 7.2.2.1)**

Readily biodegradable (yes/no)

No

**Aerobic mineralisation in surface water (Regulation (EU) N° 283/2013, Annex Part A, point 7.2.2.2 and Regulation (EU) N° 284/2013, Annex Part A, point 9.2.1)**

| Parent S-metolachlor                                    |                |                      |                     |                                                                         |                                   |                       |                                                         |                                  |                       |                       |
|---------------------------------------------------------|----------------|----------------------|---------------------|-------------------------------------------------------------------------|-----------------------------------|-----------------------|---------------------------------------------------------|----------------------------------|-----------------------|-----------------------|
| System identifier (indicate fresh, estuarine or marine) | pH water phase | pH sed <sup>a)</sup> | t. °C <sup>b)</sup> | DT <sub>50</sub> /DT <sub>90</sub> whole sys. (suspended sediment test) |                                   | St. (χ <sup>2</sup> ) | DT <sub>50</sub> /DT <sub>90</sub> Water (pelagic test) |                                  | St. (χ <sup>2</sup> ) | Method of calculation |
|                                                         |                |                      |                     | At study temp                                                           | Normalised to 12 °C <sup>c)</sup> |                       | At study temp                                           | Normalised to x °C <sup>c)</sup> |                       |                       |
| Fresh water plus suspended sediment, 10 µg/L            | 8.6            | 7.6                  | 20                  | 74/245.1                                                                | 158/523.32                        | 2.41                  | NA                                                      | NA                               | --                    | SFO                   |
| Fresh water plus suspended sediment, 95 µg/L            | 8.6            | 7.6                  | 20                  | 97/321.7                                                                | 207.12/686.87                     | 1.23                  | NA                                                      | NA                               | --                    | SFO                   |

- a) Measured in calcium chloride solution
- b) Temperature of incubation=temperature that the environmental media was collected or std temperature of 20 °C
- c) Normalised based on ECHA R11 PBT guidance using a Q<sub>10</sub> of 2.58 to the temperature of the environmental media at the point of sampling..

NA: not applicable

| Metabolite<br>CGA40172                                           | Max in total system 9.1 % after 58 days |                         |                        |                                                                               |                                           |                          |                                                               |                                             |                          |                          |
|------------------------------------------------------------------|-----------------------------------------|-------------------------|------------------------|-------------------------------------------------------------------------------|-------------------------------------------|--------------------------|---------------------------------------------------------------|---------------------------------------------|--------------------------|--------------------------|
| System identifier<br>(indicate fresh,<br>estuarine or<br>marine) | pH<br>water<br>phase                    | pH<br>sed <sup>a)</sup> | t.<br>°C <sup>b)</sup> | DT <sub>50</sub> /DT <sub>90</sub> whole sys.<br>(suspended sediment<br>test) |                                           | St.<br>(χ <sup>2</sup> ) | DT <sub>50</sub> /DT <sub>90</sub><br>Water (pelagic<br>test) |                                             | St.<br>(χ <sup>2</sup> ) | Method of<br>calculation |
|                                                                  |                                         |                         |                        | At study<br>temp                                                              | Norma-<br>lised to 12<br>°C <sup>c)</sup> |                          | At<br>study<br>temp                                           | Norma-<br>lised<br>to x<br>°C <sup>c)</sup> |                          |                          |
| Fresh water plus<br>suspended<br>sediment,<br>10 µg/L            | 8.6                                     | 7.6                     | 20                     | NA                                                                            | NA                                        | --                       | NA                                                            | NA                                          | --                       | --                       |
| Fresh water plus<br>suspended<br>sediment,<br>95 µg/L            | 8.6                                     | 7.6                     | 20                     | NA                                                                            | NA                                        | --                       | NA                                                            | NA                                          | --                       | --                       |

a) Measured in [medium to be stated, usually calcium chloride solution or water]

b) Temperature of incubation=temperature that the environmental media was collected or std temperature of 20 °C

c) Normalised using a Q<sub>10</sub> of 2.58 to the temperature of the environmental media at the point of sampling. (note temp of x should be stated).

NA: not applicable

| Mineralisation and non extractable residues (for parent dosed experiments) |                      |           |                                                         |                                                                                |                                                                                                   |
|----------------------------------------------------------------------------|----------------------|-----------|---------------------------------------------------------|--------------------------------------------------------------------------------|---------------------------------------------------------------------------------------------------|
| System identifier<br>(indicate fresh,<br>estuarine or<br>marine)           | pH<br>water<br>phase | pH<br>sed | Mineralisation<br>x % after n d. (end<br>of the study). | Non-extractable<br>residues. max x %<br>after n d (suspended<br>sediment test) | Non-extractable residues.<br>max x % after n d (end of<br>the study) (suspended<br>sediment test) |
| Fresh water plus<br>suspended<br>sediment,<br>10 µg/L                      | 8.6                  | 7.6       | 4.5 % after 58 d                                        | ND                                                                             | ND                                                                                                |
| Fresh water plus<br>suspended<br>sediment,<br>95 µg/L                      | 8.6                  | 7.6       | 3.9 % after 58 d                                        | ND                                                                             | ND                                                                                                |

ND: not detected

**Water / sediment study (Regulation (EU) N° 283/2013, Annex Part A, point 7.2.2.3 and Regulation (EU) N° 284/2013, Annex Part A, point 9.2.2)**

| Parent S-metolachlor dosed Mamouni, metolachlor dosed Seyfried. | Distribution (max in water 8.9 % after 99 d, max. sed 21.2 % after 99 d) |                      |       |                                               |                  |                                          |                  |                                        |                  |                       |
|-----------------------------------------------------------------|--------------------------------------------------------------------------|----------------------|-------|-----------------------------------------------|------------------|------------------------------------------|------------------|----------------------------------------|------------------|-----------------------|
| Water / sediment system                                         | pH water phase                                                           | pH sed <sup>a)</sup> | t. °C | DT <sub>50</sub> /DT <sub>90</sub> whole sys. | St. ( $\chi^2$ ) | DT <sub>50</sub> /DT <sub>90</sub> water | St. ( $\chi^2$ ) | DT <sub>50</sub> /DT <sub>90</sub> sed | St. ( $\chi^2$ ) | Method of calculation |
| River (Rhine), sandy loam (study Mamouni)                       | 7.7                                                                      | 8.3                  | 20    | 54.8 / 182                                    | 1.9              | NA                                       | NA               | NA                                     | --               | SFO                   |
| Pond (Ormalingen), silt loam (study Mamouni)                    | 7.3                                                                      | 8.1                  | 20    | 42.0 / 140                                    | 3.5              | NA                                       | NA               | NA                                     | --               | SFO                   |
| River (Rhine), sandy loam (study Seyfried)                      | 7.7                                                                      | 8.3                  | 20    | 45.4 / 151                                    | 3.1              | NA                                       | NA               | NA                                     | --               | SFO                   |
| Pond (Ormalingen), silt loam (study Seyfried)                   | 7.3                                                                      | 8.1                  | 20    | 33.6 / 112                                    | 3.8              | NA                                       | NA               | NA                                     | --               | SFO                   |
| Geometric mean at 20 °C                                         |                                                                          |                      |       | 43.3                                          |                  |                                          |                  |                                        |                  |                       |

<sup>a)</sup> Measured in [medium to be stated, usually calcium chloride solution or water]

NA: not applicable

| Metabolite CGA41507                          | Distribution (Max in water 8.2 % after 175 d, max. sed 12.1 % after 271 d). Max in total system 17.8 % after 175 days.<br>Under anaerobic conditions: max. 54.7 % after 271 days in total system |                      |       |                                               |                  |                                          |                  |                                        |                  |                       |
|----------------------------------------------|--------------------------------------------------------------------------------------------------------------------------------------------------------------------------------------------------|----------------------|-------|-----------------------------------------------|------------------|------------------------------------------|------------------|----------------------------------------|------------------|-----------------------|
| Water / sediment system                      | pH water phase                                                                                                                                                                                   | pH sed <sup>a)</sup> | t. °C | DT <sub>50</sub> /DT <sub>90</sub> whole sys. | St. ( $\chi^2$ ) | DT <sub>50</sub> /DT <sub>90</sub> water | St. ( $\chi^2$ ) | DT <sub>50</sub> /DT <sub>90</sub> sed | St. ( $\chi^2$ ) | Method of calculation |
| All systems                                  | -                                                                                                                                                                                                | -                    | -     | NA                                            | NA               | NA                                       | NA               | NA                                     | NA               | NA                    |
| DegT <sub>50</sub> used for modelling (days) |                                                                                                                                                                                                  |                      |       | 1000                                          |                  |                                          |                  |                                        |                  |                       |

| Metabolite CGA51202 (OXA)                    | Distribution (max in water 16.8 % after 362 d, max in total system 21.2 % after 362 days, max in sediment 5.1% after 271 d) |                      |       |                                               |                  |                                          |                  |                                        |                  |                       |
|----------------------------------------------|-----------------------------------------------------------------------------------------------------------------------------|----------------------|-------|-----------------------------------------------|------------------|------------------------------------------|------------------|----------------------------------------|------------------|-----------------------|
| Water / sediment system                      | pH water phase                                                                                                              | pH sed <sup>a)</sup> | t. °C | DT <sub>50</sub> /DT <sub>90</sub> whole sys. | St. ( $\chi^2$ ) | DT <sub>50</sub> /DT <sub>90</sub> water | St. ( $\chi^2$ ) | DT <sub>50</sub> /DT <sub>90</sub> sed | St. ( $\chi^2$ ) | Method of calculation |
| All systems                                  | -                                                                                                                           | -                    | -     | NA                                            | NA               | NA                                       | NA               | NA                                     | NA               | NA                    |
| DegT <sub>50</sub> used for modelling (days) |                                                                                                                             |                      |       | 1000                                          |                  |                                          |                  |                                        |                  |                       |

|                                              |                                                                                                                            |                      |       |                                               |                  |                                          |                  |                                        |                  |                       |
|----------------------------------------------|----------------------------------------------------------------------------------------------------------------------------|----------------------|-------|-----------------------------------------------|------------------|------------------------------------------|------------------|----------------------------------------|------------------|-----------------------|
| Metabolite CGA354743 (ESA)                   | Distribution (Max in water 6.7 % after 362 d, max in total system 8.5 % after 362 days, max in sediment 2.7% after 362 d). |                      |       |                                               |                  |                                          |                  |                                        |                  |                       |
| Water / sediment system                      | pH water phase                                                                                                             | pH sed <sup>a)</sup> | t. °C | DT <sub>50</sub> /DT <sub>90</sub> whole sys. | St. ( $\chi^2$ ) | DT <sub>50</sub> /DT <sub>90</sub> water | St. ( $\chi^2$ ) | DT <sub>50</sub> /DT <sub>90</sub> sed | St. ( $\chi^2$ ) | Method of calculation |
| All systems                                  | -                                                                                                                          | -                    | -     | NA                                            | NA               | NA                                       | NA               | NA                                     | NA               | NA                    |
| DegT <sub>50</sub> used for modelling (days) |                                                                                                                            |                      |       | 1000                                          |                  |                                          |                  |                                        |                  |                       |

|                                              |                                                                                                                           |                      |       |                                               |                  |                                          |                  |                                        |                  |                       |
|----------------------------------------------|---------------------------------------------------------------------------------------------------------------------------|----------------------|-------|-----------------------------------------------|------------------|------------------------------------------|------------------|----------------------------------------|------------------|-----------------------|
| Metabolite CGA217498                         | Distribution (Max in water 2.7% after 362 d., max in total system 5.6 % after 362 days, max in sediment 2.9% after 362 d) |                      |       |                                               |                  |                                          |                  |                                        |                  |                       |
| Water / sediment system                      | pH water phase                                                                                                            | pH sed <sup>a)</sup> | t. °C | DT <sub>50</sub> /DT <sub>90</sub> whole sys. | St. ( $\chi^2$ ) | DT <sub>50</sub> /DT <sub>90</sub> water | St. ( $\chi^2$ ) | DT <sub>50</sub> /DT <sub>90</sub> sed | St. ( $\chi^2$ ) | Method of calculation |
| All systems                                  | -                                                                                                                         | -                    | -     | NA                                            | NA               | NA                                       | NA               | NA                                     | NA               | NA                    |
| DegT <sub>50</sub> used for modelling (days) |                                                                                                                           |                      |       | NA                                            |                  |                                          |                  |                                        |                  |                       |

| Mineralisation and non extractable residues (from parent dosed experiments) |                |        |                                                   |                                                    |                                                                       |
|-----------------------------------------------------------------------------|----------------|--------|---------------------------------------------------|----------------------------------------------------|-----------------------------------------------------------------------|
| Water / sediment system                                                     | pH water phase | pH sed | Mineralisation x % after n d. (end of the study). | Non-extractable residues in sed. max x % after n d | Non-extractable residues in sed. max x % after n d (end of the study) |
| River (Rhine), sandy loam (study Mamouni)                                   | 7.7            | 8.3    | 4.5 % after 362 d                                 | 40.3 % after 175 d                                 | 39.7 % after 362 d                                                    |
| Pond (Ormalingen), silt loam (study Mamouni)                                | 7.3            | 8.1    | 1.8 % after 362 d                                 | 58.8 % after 175 d                                 | 60.8 % after 362 d                                                    |
| River (Rhine), sandy loam (study Seyfried)                                  | 7.7            | 8.3    | 3.1 % after 180 d                                 | 35.8 % after 91 d                                  | 34.8 % after 180 d                                                    |
| Pond (Ormalingen), silt loam (study Seyfried)                               | 7.3            | 8.1    | 2.0 % after 180 d                                 | 52.9 % after 91 d                                  | 56.5 % after 180 d                                                    |



**Fate and behaviour in air (Regulation (EU) N° 283/2013, Annex Part A, point 7.3.1)**

|                                            |                                                                                                                                         |
|--------------------------------------------|-----------------------------------------------------------------------------------------------------------------------------------------|
| Direct photolysis in air                   | Not studied - no data requested                                                                                                         |
| Photochemical oxidative degradation in air | DT <sub>50</sub> of 2.3 hours derived by the Atkinson model (version 1.91). OH-radical concentration assumed = 1.5 <sup>6</sup> (12 h). |
| Volatilisation                             | Experimental data demonstrates that S-metolachlor has a potential for volatilisation.                                                   |
| Metabolites                                | No information available                                                                                                                |

**Residues requiring further assessment (Regulation (EU) N° 283/2013, Annex Part A, point 7.4.1)**

|                                                                                                                                                                           |                                                                                                                                                                                                                                                                                                                                                                                                                                                                                                                                                                                                                                                                                                                                                                                                                                              |
|---------------------------------------------------------------------------------------------------------------------------------------------------------------------------|----------------------------------------------------------------------------------------------------------------------------------------------------------------------------------------------------------------------------------------------------------------------------------------------------------------------------------------------------------------------------------------------------------------------------------------------------------------------------------------------------------------------------------------------------------------------------------------------------------------------------------------------------------------------------------------------------------------------------------------------------------------------------------------------------------------------------------------------|
| Environmental occurring residues requiring further assessment by other disciplines (toxicology and ecotoxicology) and or requiring consideration for groundwater exposure | <p>Soil:<br/>S-metolachlor<sup>a</sup>, metolachlor, OXA (CGA51202), ESA (CGA354743), CGA40172, CGA50720, CGA368208, CGA37735, NOA436611, CGA357704</p> <p>Surface water and sediment:<br/>S-metolachlor<sup>a</sup>, metolachlor, OXA (CGA51202), ESA (CGA354743), CGA40172, CGA50720, CGA368208, CGA37735, NOA436611, CGA41507, CGA357704 and (via bank filtration from groundwater)<br/>SYN542489, SYN542490, NOA413173, SYN542607, SYN547969, SYN542491, SYN542492, SYN542488, SYN547977</p> <p>Groundwater:<br/>S-metolachlor<sup>a</sup>, metolachlor, CGA354743 (ESA), CGA51202 (OXA), CGA357704, CGA368208, CGA37735, CGA40172, CGA50720, NOA413173, NOA436611, SYN542488, SYN542489, SYN542490, SYN542491, SYN542492, SYN542607, SYN545026, SYN545027, SYN547969, SYN547977</p> <p>Air:<br/>S-metolachlor<sup>a</sup> (default)</p> |
|---------------------------------------------------------------------------------------------------------------------------------------------------------------------------|----------------------------------------------------------------------------------------------------------------------------------------------------------------------------------------------------------------------------------------------------------------------------------------------------------------------------------------------------------------------------------------------------------------------------------------------------------------------------------------------------------------------------------------------------------------------------------------------------------------------------------------------------------------------------------------------------------------------------------------------------------------------------------------------------------------------------------------------|

<sup>a</sup> S-metolachlor (S-isomer 80-100%, R-isomer 20-0%)

**Definition of the residue for monitoring (Regulation (EU) N° 283/2013, Annex Part A, point 7.4.2)**

|                              |
|------------------------------|
| See section 5, Ecotoxicology |
|------------------------------|

**Monitoring data, if available (Regulation (EU) N° 283/2013, Annex Part A, point 7.5)**

|                                                     |                       |
|-----------------------------------------------------|-----------------------|
| Soil (indicate location and type of study)          | Not available         |
| Surface water (indicate location and type of study) | Not available         |
| Air (indicate location and type of study)           | Not available         |
| Ground water (indicate location and type of study)  | Available (see below) |



**Summary of public groundwater monitoring data for S-metolachlor and its metabolites**

| Country     | Reference                        | Substance     | Number of samples | Number of wells | Number of residues >LOQ | Percentage of residues >LOQ | Percentage of residues >0.1 µg/L | Max. residue µg/L |
|-------------|----------------------------------|---------------|-------------------|-----------------|-------------------------|-----------------------------|----------------------------------|-------------------|
| Germany     | KCA 7.5/52 (2010-2013)           | S-Metolachlor | 158               | 24              | 157                     | 99                          | 0                                | 0.03              |
|             | KCA 7.5/52 (2002-2005)           | S-Metolachlor | 507               | 36              | 507                     | 100                         | 0                                | <LOQ              |
| Belgium     | KCA 7.5/77 (2009-2014)           | S-Metolachlor | 98-477            | 7-231           | n.a.                    | n.a.                        | 0.2-1.3                          | n.a.              |
| Switzerland | KCA 7.5/78 (1992-1993 2003-2004) | S-Metolachlor | 61                | 8               | 32                      | 52                          | 7                                | 0.14              |
|             | KCA 7.5/79 (1990-1991)           | Metolachlor   | 139               | 35              | 123                     | 88                          | 0                                | 0.02              |
|             | KCA 7.5/80 (1988-2003)           | Metolachlor   | 505               | 6               | 380                     | 75                          | 3                                | 0.8               |
| Portugal    | KCA 7.5/81 (1999-2007)           | Metolachlor   | 674               | 68              | 661                     | 98                          | 0.003                            | 0.15              |
| Spain       | KCA 7.5/82 (2000-2001)           | Metolachlor   | 242               | 47              | 192                     | 79                          | 6                                | >1.3              |
| Italy       | KCA 7.5/83/84 (1997+2006)        | S-Metolachlor | 199               | 100             | 149                     | 75                          | 5                                | 3.085             |
| France      | KCA 7.5/85 (2009)                | Metolachlor   | 568               | 21              | 507                     | 89                          | 0                                | 0.24              |
|             | KCA 7.5/62 (2006-2013)           | S-Metolachlor | 768               | 21              | 679                     | 88.4                        | 0.65                             | 0.58              |

| Country | Reference              | Substance | Number of samples | Number of wells | Number of residues >LOQ | Percentage of residues >LOQ | Percentage of residues >10µg/L | Max. residue µg/L |
|---------|------------------------|-----------|-------------------|-----------------|-------------------------|-----------------------------|--------------------------------|-------------------|
| Germany | KCA 7.5/52 (2010-2013) | ESA       | 158               | 24              | 53                      | 34                          | 4                              | 18.86             |



|                    |                                      |     |      |      |      |       |      |      |
|--------------------|--------------------------------------|-----|------|------|------|-------|------|------|
|                    | <b>KCA 7.5/61<br/>(2009-2012)</b>    | ESA | 3215 | n.a. | 2681 | n.a.  | n.a. | n.a. |
|                    | <b>KCA 7.5/52<br/>(2002-2005)</b>    | ESA | 507  | 36   | 332  | 65    | 0    | 7.94 |
| <b>Switzerland</b> | <b>KCA 7.5/80<br/>(1988-2003)</b>    | ESA | 90   | 6    | 67   | 74    | 0    | 2.34 |
| <b>Portugal</b>    | <b>KCA 7.5/81<br/>(1999-2007)</b>    | ESA | 187  | 68   | 140  | 75    | 0    | 1.79 |
| <b>Italy</b>       | <b>KCA 7.5/83/84<br/>(1997+2006)</b> | ESA | 100  | 100  | 42   | 42    | 0    | 4.35 |
| <b>France</b>      | <b>KCA 7.5/85<br/>(2009)</b>         | ESA | 568  | 21   | 13   | 24    | 0    | 4.2  |
|                    | <b>KCA 7.5/62<br/>(2006-2013)</b>    | ESA | 770  | 21   | 170  | 22.08 | 0    | 4.2  |

| Country            | Reference                            | Substance | Number of samples | Number of wells | Number of residues >LOQ | Percentage of residues >LOQ | Percentage of residues >10µg/L | Max. residue µg/L |
|--------------------|--------------------------------------|-----------|-------------------|-----------------|-------------------------|-----------------------------|--------------------------------|-------------------|
| <b>Germany</b>     | <b>KCA 7.5/52<br/>(2010-2013)</b>    | OXA       | 158               | 24              | 87                      | 55                          | 3                              | 16.79             |
|                    | <b>KCA 7.5/61<br/>(2009-2012)</b>    | OXA       | 3114              |                 | 2824                    |                             |                                |                   |
|                    | <b>KCA 7.5/52<br/>(2002-2005)</b>    | OXA       | 507               | 36              | 426                     | 84                          | 0                              | 2.47              |
| <b>Switzerland</b> | <b>KCA 7.5/80<br/>(1988-2003)</b>    | OXA       | 90                | 6               | 79                      | 88                          | 0                              | 0.81              |
| <b>Portugal</b>    | <b>KCA 7.5/81<br/>(1999-2007)</b>    | OXA       | 187               | 68              | 184                     | 98                          | 0                              | 0.12              |
| <b>Italy</b>       | <b>KCA 7.5/83/84<br/>(1997+2006)</b> | OXA       | 100               | 100             | 73                      | 73                          | 0                              | 2.61              |
| <b>France</b>      | <b>KCA 7.5/85<br/>(2009)</b>         | OXA       | 568               | 21              | 492                     | 87                          | 0                              | 0.75              |
|                    | <b>KCA 7.5/62<br/>(2006-2013)</b>    | OXA       | 768               | 21              | 668                     | 86.98                       | 0                              | 1.11              |

### Summary of S-metolachlor and Metolachlor Groundwater Monitoring Results Obtained for the Selected Countries

| Country        | Parameter Name          | Years              | Sample Summary    |                                                                          |                             |                             |                           |                           | Location Summary    |                                                                                      |                             |                           |                          |                           |
|----------------|-------------------------|--------------------|-------------------|--------------------------------------------------------------------------|-----------------------------|-----------------------------|---------------------------|---------------------------|---------------------|--------------------------------------------------------------------------------------|-----------------------------|---------------------------|--------------------------|---------------------------|
|                |                         |                    | Number of Samples | Number of Samples with Detections and percent of total number of samples |                             |                             |                           |                           | Number of Locations | Number of Locations with Maximum Detections and percent of total number of locations |                             |                           |                          |                           |
|                |                         |                    |                   | ND                                                                       | > RL                        | >0.1 µg/L                   | >1.0 µg/L                 | >10.0 µg/L                |                     | ND                                                                                   | > RL                        | >0.1 µg/L                 | >1.0 µg/L                | >10.0 µg/L                |
| Austria        | SMOC/metolachlor        | 2008 - 2018        | 24,094            | 23,344<br>96.9%                                                          | 750<br>3.1%                 | 85<br>0.4%                  | 10<br>0.0%                | 0<br>0%                   | 1,675               | 1,430<br>85.4%                                                                       | 245<br>14.6%                | 40<br>2.4%                | 7<br>0.4%                | 0<br>0%                   |
| Bulgaria       | Metolachlor             | 2012 - 2018        | 111               | 111<br>100%                                                              | 0<br>0%                     | 0<br>0%                     | 0<br>0%                   | 0<br>0%                   | 52                  | 52<br>100%                                                                           | 0<br>0%                     | 0<br>0%                   | 0<br>0%                  | 0<br>0%                   |
| Czech Republic | Metolachlor             | 2008 - 2018        | 12,747            | 12,644<br>99.2%                                                          | 103<br>0.8%                 | 16<br>0%                    | 0<br>0%                   | 0<br>0%                   | 797                 | 763<br>95.7%                                                                         | 34<br>4.3%                  | 9<br>1.1%                 | 0<br>0%                  | 0<br>0%                   |
| France         | SMOC/metolachlor        | 2008 - 2018        | 151,574           | 146,565<br>96.7%                                                         | 5,009<br>3.3%               | 1,026<br>0.7%               | 118<br>0.08%              | 18<br>0.01%               | 24,421              | 23,062<br>94.4%                                                                      | 1,359<br>5.6%               | 291<br>1.2%               | 40<br>0.2%               | 7<br>0.03%                |
| Germany        | SMOC/metolachlor        | 2008 - 2018        | 25,443            | 25,168<br>98.9%                                                          | 275<br>1.1%                 | 52<br>0.2%                  | 2<br>0.01%                | 0<br>0%                   | 6,117               | 6,001<br>98.1%                                                                       | 116<br>1.9%                 | 31<br>0.5%                | 1<br>0.02%               | 0<br>0%                   |
| Italy          | SMOC/metolachlor        | 2008 - 2018        | 33,013            | 31,629<br>95.8%                                                          | 1,384<br>4.2%               | 242<br>0.7%                 | 41<br>0.1%                | 2<br>0.01%                | 4,447               | 3,943<br>88.7%                                                                       | 504<br>11.3%                | 114<br>2.6%               | 25<br>0.6%               | 2<br>0.04%                |
| Netherlands    | SMOC/metolachlor        | 2008 - 2016        | 1,969             | 1,965<br>99.8%                                                           | 4<br>0.2%                   | 1<br>0.1%                   | 0<br>0%                   | 0<br>0%                   | 1,417               | 1,413<br>99.7%                                                                       | 4<br>0.3%                   | 1<br>0.1%                 | 0<br>0%                  | 0<br>0%                   |
| Portugal       | Metolachlor             | 2010 - 2017        | 1,055             | 1,049<br>99.4%                                                           | 6<br>0.6%                   | 4<br>0.4%                   | 4<br>0.4%                 | 0<br>0%                   | 422                 | 417<br>98.8%                                                                         | 5<br>1.2%                   | 3<br>0.7%                 | 3<br>0.7%                | 0<br>0%                   |
| Slovakia       | SMOC                    | 2011 - 2014        | 801               | 793<br>99.0%                                                             | 8<br>1.0%                   | 3<br>0.4%                   | 0<br>0%                   | 0<br>0%                   | 182                 | 179<br>98.4%                                                                         | 3<br>1.6%                   | 2<br>1.1%                 | 0<br>0%                  | 0<br>0%                   |
| Slovenia       | Metolachlor             | 2008 - 2015        | 1,949             | 1,825<br>93.6%                                                           | 124<br>6.4%                 | 36<br>1.8%                  | 6<br>0%                   | 0<br>0%                   | 261                 | 224<br>85.8%                                                                         | 37<br>14.2%                 | 18<br>6.9%                | 5<br>1.9%                | 0<br>0%                   |
| Spain          | Metolachlor             | 2008 - 2018        | 3,821             | 3,639<br>95.2%                                                           | 182<br>4.8%                 | 54<br>1.4%                  | 11<br>0.3%                | 2<br>0.1%                 | 614                 | 559<br>91.0%                                                                         | 55<br>9.0%                  | 22<br>3.6%                | 6<br>1.0%                | 1<br>0.2%                 |
| <b>Total</b>   | <b>SMOC/metolachlor</b> | <b>2008 - 2018</b> | <b>256,577</b>    | <b>248,732</b><br><b>96.9%</b>                                           | <b>7,845</b><br><b>3.1%</b> | <b>1,519</b><br><b>0.6%</b> | <b>192</b><br><b>0.1%</b> | <b>22</b><br><b>0.01%</b> | <b>40,405</b>       | <b>38,043</b><br><b>94.2%</b>                                                        | <b>2,362</b><br><b>5.8%</b> | <b>531</b><br><b>1.3%</b> | <b>87</b><br><b>0.2%</b> | <b>10</b><br><b>0.02%</b> |



**Summary of groundwater monitoring data for S-metolachlor and its metabolites (performed by the applicant)<sup>1</sup>**

| Substance                      | Pan-European groundwater monitoring                                                                                           |                                    |                                   |             |                                           |                                            |                                    |                                   |             |                                           |
|--------------------------------|-------------------------------------------------------------------------------------------------------------------------------|------------------------------------|-----------------------------------|-------------|-------------------------------------------|--------------------------------------------|------------------------------------|-----------------------------------|-------------|-------------------------------------------|
|                                | Groundwater monitoring sites allocated to the FOCUS zone Hamburg (n=56), sites considered to represent triennial applications |                                    |                                   |             |                                           |                                            |                                    |                                   |             |                                           |
| Dose rate covered at the sites | 1250 g/ha<br>(n=13 sites)                                                                                                     |                                    |                                   |             |                                           | 1440 g/ha<br>(n=10 sites)                  |                                    |                                   |             |                                           |
|                                | ≥ LOQ <sup>2</sup> (in % of samples/wells)                                                                                    | ≥ 0.1 µg/L (in % of samples/wells) | ≥ 10 µg/L (in % of samples/wells) | Max. (µg/L) | 90 <sup>th</sup> perc. annual max. (µg/L) | ≥ LOQ <sup>2</sup> (in % of samples/wells) | ≥ 0.1 µg/L (in % of samples/wells) | ≥ 10 µg/L (in % of samples/wells) | Max. (µg/L) | 90 <sup>th</sup> perc. annual max. (µg/L) |
| S-metolachlor                  | 9<br>/<br>31                                                                                                                  | 7<br>/<br>23                       | n.a.                              | 1.3         | 0.078                                     | 6<br>/<br>25                               | 4<br>/<br>13                       | n.a.                              | 0.6         | 0.005                                     |
| SYN547977                      | 13<br>/<br>39                                                                                                                 | 4.5<br>/<br>23                     | n.a.                              | 0.304       | 0.09                                      | 3.6<br>/<br>25                             | 0.7<br>/<br>13                     | n.a.                              | 0.189       | 0.025                                     |
| CGA354743 (ESA)                | 87<br>/<br>100                                                                                                                | 79<br>/<br>93                      | 3<br>/<br>31                      | 32.1        | 8.7                                       | 80<br>/<br>100                             | 68<br>/<br>88                      | 2<br>/<br>25                      | 32.1        | 8.3                                       |
| CGA51202 (OXA)                 | 77<br>/<br>92                                                                                                                 | 67<br>/<br>85                      | 3<br>/<br>23                      | 18.2        | 5.0                                       | 77<br>/<br>92                              | 67<br>/<br>85                      | 3<br>/<br>23                      | 18.2        | 4.8                                       |

<sup>1</sup> It was clarified by EFSA during the Expert's consultation on S-metolachlor (teleconference 28, 14-16 October 2020) that the representative uses with lower dose rates (500, 720 and

1000 g a.s./ha) introduced during the peer review process as “mitigation measures” cannot be formally accepted at this stage. EFSA is only able to conclude on the GAP included in the submitted dossier and the EFSA conclusion will be on the representative uses of 1250 and 1440 g a.s./ha. Therefore, the RMS crossed out the results for these uses in the RAR.

<sup>2</sup> Limit of quantification (LOQ) for S-metolachlor was 0.01 µg/L and 0.05 µg/L for OXA and ESA

n.a. Not available

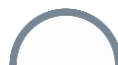

**PEC soil (Regulation (EU) N° 284/2013, Annex Part A, points 9.1.3 / 9.3.1)**

|                       |                                                                                                                                                                                                                                                                                                                                                                                                                                              |
|-----------------------|----------------------------------------------------------------------------------------------------------------------------------------------------------------------------------------------------------------------------------------------------------------------------------------------------------------------------------------------------------------------------------------------------------------------------------------------|
| Parent                | DT <sub>50</sub> (d): not required (only PECs, act is needed)                                                                                                                                                                                                                                                                                                                                                                                |
| Method of calculation |                                                                                                                                                                                                                                                                                                                                                                                                                                              |
| Application data      | <p>Crop: maize and sunflower (pre-emergence) and maize (post-emergence)</p> <p>Depth of soil layer: 5 cm</p> <p>Tillage depth: 20 cm</p> <p>Soil bulk density: 1.5g/cm<sup>3</sup></p> <p>% plant interception:</p> <p style="padding-left: 20px;">Pre-emergence 0 %</p> <p style="padding-left: 20px;">Post-emergence 25 %</p> <p>Number of applications: 1</p> <p>Interval (d): n.a.</p> <p>Application rate(s): 1440 and 1250 g as/ha</p> |

| Metabolites              | Metabolite      | DT <sub>50</sub><br>Longest DegT <sub>50</sub><br>lab (FOCUS<br>default) | Molecular<br>weight<br>(g/mole) | Correction<br>factor | Max.<br>occurrence<br>in soil (%) |
|--------------------------|-----------------|--------------------------------------------------------------------------|---------------------------------|----------------------|-----------------------------------|
| Method of<br>calculation | ESA (CGA354743) | 1000                                                                     | 329.4                           | 1.16                 | 23.6                              |
|                          | OXA (CGA51202)  | 1000                                                                     | 279.3                           | 0.98                 | 21.3                              |
|                          | CGA368208       | 163                                                                      | 257.3                           | 0.91                 | 7.6                               |
|                          | CGA40172        | 133                                                                      | 265.3                           | 0.93                 | 6.5                               |
|                          | CGA50720        | 23                                                                       | 207.2                           | 0.73                 | 8.2                               |
|                          | CGA37735        | 1 1.4                                                                    | 193.2                           | 0.68                 | 7.1                               |
|                          | NOA436611       | 345                                                                      | 355.5                           | 1.25                 | 9.1                               |
|                          | CGA357704       | 1000                                                                     | 279.3                           | 0.984                | 21.9                              |

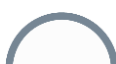

**Summary of initial and accumulated PEC<sub>soil</sub> of A9396G, S-metolachlor and its soil metabolites to pre-emergent maize and sunflower crops (BBCH 00-10) at 1440 g a.s./ha**

| Formulation/<br>compound       | Crop              | Maximum use rate<br>[g/ha] | No. of appl. | Crop interception [%] | Soil loading<br>[g/ha] | PEC <sub>soil</sub> ,<br>initial<br>[mg/kg] | PEC <sub>soil</sub> ,<br>peak<br>accum*<br>[mg/kg] |
|--------------------------------|-------------------|----------------------------|--------------|-----------------------|------------------------|---------------------------------------------|----------------------------------------------------|
| Formulation A9693G             | Maize & sunflower | 1665                       | 1            | 0                     | 1665                   | 2.220                                       | -                                                  |
| Active substance S-metolachlor | Maize & sunflower | 1440                       | 1            | 0                     | 1440                   | 1.920                                       | NA                                                 |
| ESA (CGA354743)                | Maize & sunflower | -                          | -            | -                     | -                      | 0.526                                       | 2.353                                              |
| OXA (CGA51202)                 | Maize & sunflower | -                          | -            | -                     | -                      | 0.402                                       | 1.801                                              |
| CGA368208                      | Maize & sunflower | -                          | -            | -                     | -                      | 0.132                                       | 0.168                                              |
| CGA40172                       | Maize & sunflower | -                          | -            | -                     | -                      | 0.117                                       | 0.151                                              |
| CGA50720                       | Maize & sunflower | -                          | -            | -                     | -                      | 0.115                                       | NA                                                 |
| CGA37735                       | Maize & sunflower | -                          | -            | -                     | -                      | 0.093                                       | NA                                                 |
| NOA436611                      | Maize & sunflower | -                          | -            | -                     | -                      | 0.219                                       | 0.421                                              |
| CGA357704                      | Maize & sunflower | -                          | -            | -                     | -                      | 0.414                                       | 1.851                                              |

<sup>1</sup> A9396G is an EC formulation containing 960g a.s./L with a specific density of 1110 g/L, maximum use rate is based on applying 1.5L A9693G/ha; NA – not applicable

**Summary of initial and accumulated PEC<sub>soil</sub> of A9396G, S-metolachlor and its soil metabolites to post-emergent maize (BBCH 11-18) at 1440 g a.s./ha**

| Formulation/<br>compound        | Crop  | Maximum use rate<br>[g/ha] | No. of appl. | Crop interception [%] | Soil loading<br>[g/ha] | PEC <sub>soil</sub> ,<br>initial<br>[mg/kg] | PEC <sub>soil</sub> ,<br>peak<br>accum*<br>[mg/kg] |
|---------------------------------|-------|----------------------------|--------------|-----------------------|------------------------|---------------------------------------------|----------------------------------------------------|
| Formulation A9693G <sup>1</sup> | Maize | 1665                       | 1            | 25                    | 1249                   | 1.67                                        | -                                                  |
| Active substance S-metolachlor  | Maize | 1440                       | 1            | 25                    | 1080                   | 1.44                                        | -                                                  |
| ESA (CGA354743)                 | Maize | -                          | -            | -                     | -                      | 0.394                                       | 1.75                                               |
| OXA (CGA51202)                  | Maize | -                          | -            | -                     | -                      | 0.301                                       | 1.34                                               |
| CGA368208                       | Maize | -                          | -            | -                     | -                      | 0.100                                       | 0.126                                              |
| CGA40172                        | Maize | -                          | -            | -                     | -                      | 0.087                                       | 0.113                                              |
| CGA50720                        | Maize | -                          | -            | -                     | -                      | 0.086                                       | -                                                  |
| CGA37735                        | Maize | -                          | -            | -                     | -                      | 0.070                                       | -                                                  |
| NOA436611                       | Maize | -                          | -            | -                     | -                      | 0.164                                       | 0.316                                              |
| CGA357704                       | Maize | -                          | -            | -                     | -                      | 0.310                                       | 1.388                                              |

<sup>1</sup> A9396G is an EC formulation containing 960g a.s./L with a specific density of 1110 g/L, maximum use rate is based on applying 1.5L A9693G/ha

**Summary of initial and accumulated PEC<sub>soil</sub> of A9396G, S-metolachlor and its soil metabolites to pre-emergent maize and sunflower crops (BBCH 00-10) at 1250 g a.s./ha**

| Formulation/<br>compound        | Crop              | Maximum use rate<br>[g/ha] | No. of appl. | Crop interception [%] | Soil loading<br>[g/ha] | PEC <sub>soil</sub> ,<br>initial<br>[mg/kg] | PEC <sub>soil</sub> ,<br>peak<br>accum*<br>[mg/kg] |
|---------------------------------|-------------------|----------------------------|--------------|-----------------------|------------------------|---------------------------------------------|----------------------------------------------------|
| Formulation A9693G <sup>1</sup> | Maize & sunflower | 1443                       | 1            | 0                     | 1443                   | 1.92                                        | -                                                  |
| Active substance S-metolachlor  | Maize & sunflower | 1250                       | 1            | 0                     | 1250                   | 1.67                                        | NA                                                 |



|                 |                   |   |   |   |   |       |       |
|-----------------|-------------------|---|---|---|---|-------|-------|
| ESA (CGA354743) | Maize & sunflower | - | - | - | - | 0.457 | 2.03  |
| OXA (CGA51202)  | Maize & sunflower | - | - | - | - | 0.349 | 1.55  |
| CGA368208       | Maize & sunflower | - | - | - | - | 0.115 | 0.146 |
| CGA40172        | Maize & sunflower | - | - | - | - | 0.101 | 0.131 |
| CGA50720        | Maize & sunflower | - | - | - | - | 0.100 | NA    |
| CGA37735        | Maize & sunflower | - | - | - | - | 0.081 | NA    |
| NOA436611       | Maize & sunflower | - | - | - | - | 0.190 | 0.365 |
| CGA357704       | Maize & sunflower | - | - | - | - | 0.359 | 1.607 |

<sup>1</sup> A9396G is an EC formulation containing 960g a.s./L with a specific density of 1110 g/L, maximum use rate is based on applying 1.3L A9693G/ha; NA – not applicable

### Summary of initial and accumulated PEC<sub>soil</sub> of A9396G, S-metolachlor and its soil metabolites to post-emergent maize (BBCH 11-18) at 1250 g a.s./ha

| Formulation/ compound          | Crop  | Maximum use rate [g/ha] | No. of appl. | Crop interception [%] | Soil loading [g/ha] | PEC <sub>soil</sub> , initial [mg/kg] | PEC <sub>soil</sub> , peak accum* [mg/kg] |
|--------------------------------|-------|-------------------------|--------------|-----------------------|---------------------|---------------------------------------|-------------------------------------------|
| Formulation A9693G             | Maize | 1443                    | 1            | 25                    | 1082                | 1.44                                  | -                                         |
| Active substance S-metolachlor | Maize | 1250                    | 1            | 25                    | 937.5               | 1.25                                  | NA                                        |
| ESA (CGA354743)                | Maize | -                       | -            | -                     | -                   | 0.342                                 | 1.52                                      |
| OXA (CGA51202)                 | Maize | -                       | -            | -                     | -                   | 0.261                                 | 1.17                                      |
| CGA368208                      | Maize | -                       | -            | -                     | -                   | 0.086                                 | 0.109                                     |
| CGA40172                       | Maize | -                       | -            | -                     | -                   | 0.076                                 | 0.098                                     |
| CGA50720                       | Maize | -                       | -            | -                     | -                   | 0.075                                 | NA                                        |
| CGA37735                       | Maize | -                       | -            | -                     | -                   | 0.060                                 | NA                                        |
| NOA436611                      | Maize | -                       | -            | -                     | -                   | 0.142                                 | 0.274                                     |
| CGA357704                      | Maize | -                       | -            | -                     | -                   | 0.270                                 | 1.205                                     |

<sup>1</sup> A9396G is an EC formulation containing 960g a.s./L with a specific density of 1110 g/L, maximum use rate is based on applying 1.5L A9693G/ha; NA – not applicable

**PEC ground water (Regulation (EU) N° 284/2013, Annex Part A, point 9.2.4.1)**

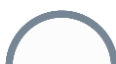

Method of calculation and type of study (e.g. modelling, field leaching, lysimeter)

**FOCUS gw modelling**

Modelling using FOCUS model(s), with appropriate FOCUS<sub>GW</sub> scenarios, according to FOCUS guidance.

Model(s) used: FOCUS-PEARL (v 4.4.4) and FOCUS-PELMO (v 5.5.3)

Crop: Maize and sunflower

TSCF: 0 and 0.17 (parent)\* and 0 (metabolites)

Water solubility (mg/L): 480 at pH 7 and 20 °C

Vapour pressure : 3.7 x 10<sup>-3</sup> Pa at 20 °C

Geometric mean DT<sub>50</sub> (d):

|                 |                                            |
|-----------------|--------------------------------------------|
| S-metolachlor   | 30.1 lab., 20 °C pF2/10 kPa                |
| ESA (CGA354743) | 235 <sup>a)</sup> lab., 20 °C pF2/10 kPa   |
| OXA (CGA51202)  | 152.5 <sup>b)</sup> lab., 20 °C pF2/10 kPa |
| CGA368208       | 36.9 lab., 20 °C pF2/10 kPa                |
| CGA37735        | 0.8 lab., 20 °C pF2/10 kPa                 |
| CGA40172        | 133.3 lab., 20 °C pF2/10 kPa               |
| CGA50720        | 10.4 lab., 20 °C pF2/10 kPa                |
| NOA436611       | 165.0 lab., 20 °C pF2/10 kPa               |
| CGA357704       | 136.0 lab., 20 °C pF2/10 kPa               |
| SYN547977       | 64.0 lab., 20 °C pF2/10 kPa                |

<sup>a)</sup>For future simulations 154.4 should be used.

<sup>b)</sup>For future simulations 98.1 should be used.

Formation fractions:

|                 |                                          |
|-----------------|------------------------------------------|
| S-metolachlor   | 0.154 <sup>a)</sup> (to ESA)             |
|                 | 0.175 <sup>b)</sup> (to OXA)             |
|                 | 0.0991 (to CGA40172)                     |
|                 | 0.0947 (to NOA436611)                    |
|                 | 0.22 (to CGA357704)                      |
|                 | 0.2572 / 0.1 <sup>#</sup> (to SYN547977) |
| ESA (CGA354743) | 0.481 (to CGA368208)                     |
|                 | 0.519 (to CGA37735)                      |
| OXA (CGA51202)  | 1.0 (to CGA50720)                        |
| CGA37735        | 0.837 (to CGA50720)                      |

<sup>a)</sup>For future simulations 0.164 should be used.

<sup>b)</sup>For future simulations 0.176 should be used.

Geometric mean KFoc (mL/g) / Arithmetic mean 1/n:

|                 |              |
|-----------------|--------------|
| S-metolachlor   | 200.2 / 0.93 |
| ESA (CGA354743) | 6.7 / 0.9    |
| OXA (CGA51202)  | 12.3 / 0.84  |
| CGA368208       | 1 / 1        |
| CGA37735        | 10.4 / 0.96  |
| CGA40172        | 174.5 / 0.76 |
| CGA50720        | 1 / 1        |
| NOA436611       | 8.4 / 0.82   |
| CGA357704       | 1 / 1        |
| SYN547977       | 60.9 / 0.93  |

\* During the expert's consultation (teleconference 28, 14-16 October 2020), the experts considered that in FOCUS simulation modelling for the active substance S-metolachlor a TSCF value of 0.3 would be appropriate for the crop maize and a value of 0.39 would be appropriate for other crops for which experimental data on those crops were not available. For future FOCUS simulations TSCF values of 0.3 (maize) and 0.39 (other

crops for which experimental data is not available) should be used.

# calculated either as 1 minus the ff of the primary S-metolachlor metabolites ESA, OXA, CGA40172, NOA436611 and CGA357704 or ff of 0.1 estimated with a manually adjusting procedure that resulted in formation of 5% (as did not reach this level that triggers assessment in any of the soil lab incubations).

### **Lysimeter studies**

*(1) Location: Birkenheide, Rhineland Palatinate, Germany*

Study type (e.g. lysimeter, field): Lysimeter

Soil properties: loamy sand (pH = 6.4, OC = 1.3 %)

Dates of application:

1st year (both lysimeter): 24/05/95;

2nd year (lysimeter 18): 04/06/96

Crop: maize, winter cereals,

Interception estimated: 25 %

Number of applications: 1 application per year

Duration: 3 years

Application rate: 1250 g/ha/year

Average annual rainfall (mm): 807 - 923

Average annual leachate volume (mm): 114.5 – 223.9

*(2) Location: Stein/Argau, Switzerland*

Study type (e.g. lysimeter, field): Lysimeter

Soil properties: sandy soil (pH = 5.6, OC=1.7 %)

Dates of application: 06 May 2002 (all soil cores), 08 May 2003 (soil core 3 and 4)

Crop: maize

Interception estimated: 0 %

Number of applications: 1 application per year

Duration: 3 years

Application rate: 1500 g/ha/year

Average annual rainfall (mm): 759 - 884

Average annual leachate volume (mm): 328 – 502

### **Field leaching studies**

*(1) Location: Lorsch, Hessen, Germany*

Study type (e.g. lysimeter, field): Field leaching

Soil properties: pH = ca. 5.2-8, OC= < 0.5-2.6 %

Dates of application and application rate:

23.05.1995: 1454 g a.s./ha

03.06.1996: 1491 g a.s./ha

27/28.05.1997: 1499 g a.s./ha

26.05.1999: 1495 g a.s./ha

23.05.2000: 1499 g a.s./ha

24.05.2002: 1241 g a.s./ha

24.05.2003: 1250 g a.s./ha

Crop: Maize

Interception: 0 % (pre-emergence)

Application rate (modelling)

| <p>Number of applications per year: 1<br/>                 Duration: 10 years<br/>                 Average annual rainfall (mm): ca. 407-964 mm<br/>                 (2) Location: Sherburne County, Minnesota, USA<br/>                 Study type (e.g. lysimeter, field): Field leaching<br/>                 Soil properties: pH = ca. 6, OC= &lt; 2 %<br/>                 Dates of application: 29.05.1996<br/>                 Application rate: 3000 g/ha.<br/>                 Crop: Maize<br/>                 Interception: 0 % (pre-emergence)<br/>                 Number of applications: 1<br/>                 Duration: 4 years<br/>                 Average annual rainfall (mm): ca. 500-600 mm</p>                                                                                                                                                                                                                                                                                                                                                                                                                                                                                                                                                                                                                                                                                                                                                                                                        |        |        |       |            |        |        |         |        |        |              |        |        |            |        |        |          |        |        |       |        |        |         |        |        |       |        |        |      |       |          |        |         |        |
|-------------------------------------------------------------------------------------------------------------------------------------------------------------------------------------------------------------------------------------------------------------------------------------------------------------------------------------------------------------------------------------------------------------------------------------------------------------------------------------------------------------------------------------------------------------------------------------------------------------------------------------------------------------------------------------------------------------------------------------------------------------------------------------------------------------------------------------------------------------------------------------------------------------------------------------------------------------------------------------------------------------------------------------------------------------------------------------------------------------------------------------------------------------------------------------------------------------------------------------------------------------------------------------------------------------------------------------------------------------------------------------------------------------------------------------------------------------------------------------------------------------------------------|--------|--------|-------|------------|--------|--------|---------|--------|--------|--------------|--------|--------|------------|--------|--------|----------|--------|--------|-------|--------|--------|---------|--------|--------|-------|--------|--------|------|-------|----------|--------|---------|--------|
| <p>Gross application rates:<br/>                 1440 and 1250 g/ha.<br/>                 Crop growth stage:<br/>                 Maize: BBCH 00-09 and BBCH 10-18<br/>                 Sunflower: BBCH 00-09<br/>                 Canopy interception %:<br/>                 0 (BBCH 00-09) and 25 (BBCH 10-18)<br/>                 Application rate net of interception:<br/>                 BBCH 00-09: 1440 and 1250 g/ha<br/>                 BBCH 10-18: 1080 and 937.5g/ha<br/>                 No. of applications: 1 (annual, biennial, triennial)<br/>                 Time of application (absolute or relative application dates):</p> <p><i>Maize</i></p> <table border="1"> <thead> <tr> <th>BBCH</th> <th>00-09</th> <th>10-18</th> </tr> </thead> <tbody> <tr> <td>Châteaudun</td> <td>01-May</td> <td>02-May</td> </tr> <tr> <td>Hamburg</td> <td>05-May</td> <td>06-May</td> </tr> <tr> <td>Kremsmünster</td> <td>05-May</td> <td>06-May</td> </tr> <tr> <td>Okehampton</td> <td>25-May</td> <td>26-May</td> </tr> <tr> <td>Piacenza</td> <td>15-May</td> <td>16-May</td> </tr> <tr> <td>Porto</td> <td>01-May</td> <td>02-May</td> </tr> <tr> <td>Seville</td> <td>07-Mar</td> <td>08-Mar</td> </tr> <tr> <td>Thiva</td> <td>20-Apr</td> <td>21-Apr</td> </tr> </tbody> </table> <p><i>Sunflower</i></p> <table border="1"> <thead> <tr> <th>BBCH</th> <th>00-09</th> </tr> </thead> <tbody> <tr> <td>Piacenza</td> <td>20-Apr</td> </tr> <tr> <td>Seville</td> <td>10-Mar</td> </tr> </tbody> </table> | BBCH   | 00-09  | 10-18 | Châteaudun | 01-May | 02-May | Hamburg | 05-May | 06-May | Kremsmünster | 05-May | 06-May | Okehampton | 25-May | 26-May | Piacenza | 15-May | 16-May | Porto | 01-May | 02-May | Seville | 07-Mar | 08-Mar | Thiva | 20-Apr | 21-Apr | BBCH | 00-09 | Piacenza | 20-Apr | Seville | 10-Mar |
| BBCH                                                                                                                                                                                                                                                                                                                                                                                                                                                                                                                                                                                                                                                                                                                                                                                                                                                                                                                                                                                                                                                                                                                                                                                                                                                                                                                                                                                                                                                                                                                          | 00-09  | 10-18  |       |            |        |        |         |        |        |              |        |        |            |        |        |          |        |        |       |        |        |         |        |        |       |        |        |      |       |          |        |         |        |
| Châteaudun                                                                                                                                                                                                                                                                                                                                                                                                                                                                                                                                                                                                                                                                                                                                                                                                                                                                                                                                                                                                                                                                                                                                                                                                                                                                                                                                                                                                                                                                                                                    | 01-May | 02-May |       |            |        |        |         |        |        |              |        |        |            |        |        |          |        |        |       |        |        |         |        |        |       |        |        |      |       |          |        |         |        |
| Hamburg                                                                                                                                                                                                                                                                                                                                                                                                                                                                                                                                                                                                                                                                                                                                                                                                                                                                                                                                                                                                                                                                                                                                                                                                                                                                                                                                                                                                                                                                                                                       | 05-May | 06-May |       |            |        |        |         |        |        |              |        |        |            |        |        |          |        |        |       |        |        |         |        |        |       |        |        |      |       |          |        |         |        |
| Kremsmünster                                                                                                                                                                                                                                                                                                                                                                                                                                                                                                                                                                                                                                                                                                                                                                                                                                                                                                                                                                                                                                                                                                                                                                                                                                                                                                                                                                                                                                                                                                                  | 05-May | 06-May |       |            |        |        |         |        |        |              |        |        |            |        |        |          |        |        |       |        |        |         |        |        |       |        |        |      |       |          |        |         |        |
| Okehampton                                                                                                                                                                                                                                                                                                                                                                                                                                                                                                                                                                                                                                                                                                                                                                                                                                                                                                                                                                                                                                                                                                                                                                                                                                                                                                                                                                                                                                                                                                                    | 25-May | 26-May |       |            |        |        |         |        |        |              |        |        |            |        |        |          |        |        |       |        |        |         |        |        |       |        |        |      |       |          |        |         |        |
| Piacenza                                                                                                                                                                                                                                                                                                                                                                                                                                                                                                                                                                                                                                                                                                                                                                                                                                                                                                                                                                                                                                                                                                                                                                                                                                                                                                                                                                                                                                                                                                                      | 15-May | 16-May |       |            |        |        |         |        |        |              |        |        |            |        |        |          |        |        |       |        |        |         |        |        |       |        |        |      |       |          |        |         |        |
| Porto                                                                                                                                                                                                                                                                                                                                                                                                                                                                                                                                                                                                                                                                                                                                                                                                                                                                                                                                                                                                                                                                                                                                                                                                                                                                                                                                                                                                                                                                                                                         | 01-May | 02-May |       |            |        |        |         |        |        |              |        |        |            |        |        |          |        |        |       |        |        |         |        |        |       |        |        |      |       |          |        |         |        |
| Seville                                                                                                                                                                                                                                                                                                                                                                                                                                                                                                                                                                                                                                                                                                                                                                                                                                                                                                                                                                                                                                                                                                                                                                                                                                                                                                                                                                                                                                                                                                                       | 07-Mar | 08-Mar |       |            |        |        |         |        |        |              |        |        |            |        |        |          |        |        |       |        |        |         |        |        |       |        |        |      |       |          |        |         |        |
| Thiva                                                                                                                                                                                                                                                                                                                                                                                                                                                                                                                                                                                                                                                                                                                                                                                                                                                                                                                                                                                                                                                                                                                                                                                                                                                                                                                                                                                                                                                                                                                         | 20-Apr | 21-Apr |       |            |        |        |         |        |        |              |        |        |            |        |        |          |        |        |       |        |        |         |        |        |       |        |        |      |       |          |        |         |        |
| BBCH                                                                                                                                                                                                                                                                                                                                                                                                                                                                                                                                                                                                                                                                                                                                                                                                                                                                                                                                                                                                                                                                                                                                                                                                                                                                                                                                                                                                                                                                                                                          | 00-09  |        |       |            |        |        |         |        |        |              |        |        |            |        |        |          |        |        |       |        |        |         |        |        |       |        |        |      |       |          |        |         |        |
| Piacenza                                                                                                                                                                                                                                                                                                                                                                                                                                                                                                                                                                                                                                                                                                                                                                                                                                                                                                                                                                                                                                                                                                                                                                                                                                                                                                                                                                                                                                                                                                                      | 20-Apr |        |       |            |        |        |         |        |        |              |        |        |            |        |        |          |        |        |       |        |        |         |        |        |       |        |        |      |       |          |        |         |        |
| Seville                                                                                                                                                                                                                                                                                                                                                                                                                                                                                                                                                                                                                                                                                                                                                                                                                                                                                                                                                                                                                                                                                                                                                                                                                                                                                                                                                                                                                                                                                                                       | 10-Mar |        |       |            |        |        |         |        |        |              |        |        |            |        |        |          |        |        |       |        |        |         |        |        |       |        |        |      |       |          |        |         |        |



**PEC<sub>GW</sub> of S-metolachlor, NOA436611, CGA354743, CGA51202, CGA368208, CGA37735, CGA40172, CGA50720 and CGA357704 from FOCUS PELMO 5.5.3 for pre-emergent maize (TSCF = 0.17).**

| Use pattern                                | Compound                             | PEC <sub>GW</sub> at 1 m soil depth [µg/L] |         |        |        |        |        |        |         |
|--------------------------------------------|--------------------------------------|--------------------------------------------|---------|--------|--------|--------|--------|--------|---------|
|                                            |                                      | Chât                                       | Ham     | Kre    | Oke    | Pia    | Por    | Sev    | Thi     |
| Maize, pre-emergence, 1440 g/ha, annual    | S-metolachlor                        | 0.002                                      | 0.041   | 0.02   | 0.048  | 0.062  | 0.01   | <0.001 | 0.001   |
|                                            | NOA436611                            | 46.929                                     | 50.775  | 38.536 | 30.26  | 28.117 | 21.749 | 28.07  | 50.448  |
|                                            | CGA354743 (ESA)                      | 90.225                                     | 87.966  | 68.657 | 54.277 | 51.108 | 38.169 | 65.89  | 106.516 |
|                                            | CGA51202 (OXA)                       | 57.832                                     | 66.86   | 50.551 | 38.575 | 36.835 | 28.779 | 32.472 | 62.57   |
|                                            | CGA40172                             | 0.001                                      | 0.038   | 0.02   | 0.084  | 0.095  | 0.006  | <0.001 | <0.001  |
|                                            | CGA368208                            | 5.899                                      | 4.953   | 3.994  | 2.893  | 3.104  | 2.375  | 4.865  | 7.422   |
|                                            | CGA37735                             | 0.086                                      | 0.085   | 0.065  | 0.051  | 0.05   | 0.033  | 0.06   | 0.102   |
|                                            | CGA50720                             | 5.71                                       | 7.424   | 5.017  | 4.358  | 3.509  | 3.284  | 3.787  | 5.978   |
| Maize, pre-emergence, 1440 g/ha, biennial  | CGA357704                            | 93.935                                     | 109.719 | 79.095 | 64.893 | 59.889 | 37.731 | 53.661 | 95.211  |
|                                            | S-metolachlor                        | 0.001                                      | 0.015   | 0.009  | 0.023  | 0.035  | 0.004  | <0.001 | <0.001  |
|                                            | NOA436611                            | 25.285                                     | 24.244  | 19.792 | 14.398 | 13.882 | 9.556  | 13.179 | 29.303  |
|                                            | CGA354743 (ESA)                      | 49.627                                     | 41.648  | 34.68  | 25.311 | 24.644 | 17.726 | 33.116 | 63.398  |
|                                            | CGA51202 (OXA)                       | 30.354                                     | 32.082  | 25.716 | 19.249 | 18.302 | 12.8   | 14.69  | 35.903  |
|                                            | CGA40172                             | <0.001                                     | 0.006   | 0.002  | 0.013  | 0.013  | 0.001  | <0.001 | <0.001  |
|                                            | CGA368208                            | 3.167                                      | 2.474   | 1.931  | 1.287  | 1.461  | 1.111  | 2.665  | 4.541   |
|                                            | CGA37735                             | 0.048                                      | 0.04    | 0.033  | 0.024  | 0.024  | 0.015  | 0.03   | 0.061   |
| Maize, pre-emergence, 1440 g/ha, triennial | CGA50720                             | 3.101                                      | 3.629   | 2.567  | 1.997  | 1.685  | 1.449  | 1.96   | 3.497   |
|                                            | CGA357704                            | 50.926                                     | 49.973  | 39.036 | 29.137 | 25.992 | 18.62  | 28.092 | 52.963  |
|                                            | S-metolachlor                        | <0.001                                     | 0.008   | 0.006  | 0.012  | 0.017  | 0.002  | <0.001 | <0.001  |
|                                            | NOA436611                            | 14.995                                     | 15.613  | 13.143 | 9.55   | 8.802  | 6.019  | 8.658  | 18.856  |
|                                            | CGA354743 (ESA)                      | 29.506                                     | 28.348  | 25.364 | 16.249 | 15.756 | 10.674 | 21.897 | 43.696  |
|                                            | CGA51202 (OXA)                       | 18.804                                     | 20.498  | 16.814 | 12.617 | 11.719 | 7.955  | 10.201 | 23.242  |
|                                            | CGA40172                             | <0.001                                     | 0.002   | 0.001  | 0.006  | 0.007  | <0.001 | <0.001 | <0.001  |
|                                            | CGA368208                            | 1.934                                      | 1.700   | 1.563  | 0.798  | 0.958  | 0.703  | 1.729  | 3.161   |
|                                            | CGA37735                             | 0.028                                      | 0.028   | 0.024  | 0.016  | 0.016  | 0.009  | 0.02   | 0.042   |
|                                            | CGA50720                             | 1.806                                      | 2.315   | 1.709  | 1.275  | 1.028  | 0.876  | 1.242  | 2.158   |
| Maize, pre-emergence, 1250 g/ha, annual    | CGA357704                            | 31.014                                     | 32.455  | 27.815 | 18.413 | 16.376 | 11.071 | 17.995 | 34.561  |
|                                            | SYN547977 <sup>1</sup> (ff = 0.1)    | 0.986                                      | 1.673   | 1.261  | 1.665  | 1.492  | 0.845  | 0.106  | 0.635   |
|                                            | SYN547977 <sup>1</sup> (ff = 0.2572) | 2.684                                      | 4.583   | 3.427  | 4.471  | 3.987  | 2.294  | 0.299  | 1.746   |
|                                            | S-metolachlor                        | 0.001                                      | 0.033   | 0.016  | 0.038  | 0.051  | 0.008  | <0.001 | <0.001  |
|                                            | NOA436611                            | 40.504                                     | 43.919  | 33.277 | 26.084 | 24.314 | 18.848 | 24.227 | 43.551  |
|                                            | CGA354743 (ESA)                      | 78.239                                     | 76.327  | 59.54  | 47.027 | 44.287 | 33.157 | 57.18  | 92.372  |
|                                            | CGA51202 (OXA)                       | 49.613                                     | 57.75   | 43.79  | 33.272 | 31.825 | 24.873 | 27.98  | 54.032  |
|                                            | CGA40172                             | 0.001                                      | 0.023   | 0.011  | 0.057  | 0.065  | 0.004  | <0.001 | <0.001  |
|                                            | CGA368208                            | 5.129                                      | 4.31    | 3.475  | 2.518  | 2.697  | 2.07   | 4.228  | 6.45    |
|                                            | CGA37735                             | 0.075                                      | 0.074   | 0.057  | 0.044  | 0.043  | 0.028  | 0.052  | 0.089   |
| Maize, pre-emergence, 1250 g/ha, biennial  | CGA50720                             | 4.956                                      | 6.485   | 4.368  | 3.799  | 3.051  | 2.869  | 3.288  | 5.188   |
|                                            | CGA357704                            | 81.56                                      | 95.238  | 68.678 | 56.325 | 52.013 | 32.761 | 46.6   | 82.662  |
|                                            | S-metolachlor                        | 0.001                                      | 0.012   | 0.007  | 0.018  | 0.029  | 0.003  | <0.001 | <0.001  |
|                                            | NOA436611                            | 21.759                                     | 20.976  | 17.099 | 12.469 | 12.012 | 8.276  | 11.263 | 25.293  |
|                                            | CGA354743 (ESA)                      | 43.036                                     | 36.145  | 30.073 | 21.938 | 21.381 | 15.371 | 28.664 | 55.012  |
|                                            | CGA51202 (OXA)                       | 26.07                                      | 27.716  | 22.183 | 16.616 | 15.822 | 11.086 | 12.607 | 30.953  |
|                                            | CGA40172                             | <0.001                                     | 0.004   | 0.002  | 0.008  | 0.009  | 0.001  | <0.001 | <0.001  |
|                                            | CGA368208                            | 2.755                                      | 2.151   | 1.681  | 1.12   | 1.271  | 0.967  | 2.315  | 3.942   |
| CGA37735                                   | 0.041                                | 0.035                                      | 0.029   | 0.021  | 0.021  | 0.013  | 0.026  | 0.053  |         |
| Maize, pre-emergence, 1250 g/ha, triennial | CGA50720                             | 2.687                                      | 3.173   | 2.235  | 1.74   | 1.467  | 1.263  | 1.702  | 3.034   |
|                                            | CGA357704                            | 44.206                                     | 43.394  | 33.897 | 25.298 | 22.567 | 16.172 | 24.394 | 45.975  |
|                                            | S-metolachlor                        | <0.001                                     | 0.006   | 0.005  | 0.01   | 0.014  | 0.001  | <0.001 | <0.001  |
|                                            | NOA436611                            | 12.93                                      | 13.494  | 11.336 | 8.258  | 7.62   | 5.21   | 7.457  | 16.273  |
|                                            | CGA354743 (ESA)                      | 25.571                                     | 24.56   | 21.979 | 14.096 | 13.669 | 9.262  | 18.981 | 37.893  |
|                                            | CGA51202 (OXA)                       | 16.23                                      | 17.692  | 14.472 | 10.897 | 10.136 | 6.879  | 8.76   | 20.07   |
|                                            | CGA40172                             | <0.001                                     | 0.002   | 0.001  | 0.004  | 0.005  | 0      | <0.001 | <0.001  |
|                                            | CGA368208                            | 1.683                                      | 1.481   | 1.359  | 0.695  | 0.833  | 0.612  | 1.502  | 2.746   |
|                                            | CGA37735                             | 0.025                                      | 0.024   | 0.021  | 0.013  | 0.013  | 0.008  | 0.018  | 0.037   |
|                                            | CGA50720                             | 1.567                                      | 2.021   | 1.486  | 1.113  | 0.895  | 0.766  | 1.08   | 1.871   |
| CGA357704                                  | 26.921                               | 28.183                                     | 24.151  | 15.988 | 14.219 | 9.612  | 15.627 | 30.006 |         |
| SYN547977 <sup>1</sup> (ff = 0.1)          | 0.840                                | 1.422                                      | 1.074   | 1.423  | 1.279  | 0.721  | 0.089  | 0.539  |         |
| SYN547977 <sup>1</sup> (ff = 0.2572)       | 2.287                                | 3.898                                      | 2.918   | 3.825  | 3.419  | 1.958  | 0.252  | 1.482  |         |

<sup>1</sup> During the experts consultation (teleconference 28, 14-16 October 2020), the experts considered that in FOCUS

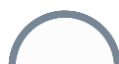

simulation modelling for the active substance S-metolachlor a TSCF value of 0.3 would be appropriate for the crop maize and a value of 0.39 would be appropriate for other crops for which experimental data on those crops were not available. The experts also considered the available PEC<sub>GW</sub> values calculated with an TSCF value of 0.17 sufficient for a Tier 1 groundwater risk assessment. Therefore, only the PEC<sub>GW</sub> values for the relevant me-tabolite SYN547977 were re-calculated by the RMS using the updated TSCF values and formation fractions.

**PEC<sub>GW</sub> of S-metolachlor, NOA436611, CGA354743, CGA51202, CGA368208, CGA37735, CGA40172, CGA50720 and CGA357704 from FOCUS PEARL 4.4 for pre-emergence maize (TSCF = 0.17).**

| Use pattern                                | Compound                          | PEC <sub>GW</sub> at 1 m soil depth [µg/L] |         |        |        |        |        |         |         |
|--------------------------------------------|-----------------------------------|--------------------------------------------|---------|--------|--------|--------|--------|---------|---------|
|                                            |                                   | Chât                                       | Ham     | Kre    | Oke    | Pia    | Por    | Sev     | Thi     |
| Maize, pre-emergence, 1440 g/ha, annual    | S-metolachlor                     | 0.005                                      | 0.051   | 0.020  | 0.062  | 0.035  | 0.006  | 0.000   | 0.001   |
|                                            | NOA436611                         | 48.322                                     | 64.937  | 35.713 | 31.475 | 42.377 | 21.519 | 32.641  | 71.191  |
|                                            | CGA354743 (ESA)                   | 89.775                                     | 118.328 | 64.340 | 55.960 | 81.372 | 37.798 | 82.545  | 148.387 |
|                                            | CGA51202 (OXA)                    | 61.376                                     | 85.689  | 47.634 | 42.276 | 54.721 | 28.683 | 39.930  | 90.127  |
|                                            | CGA40172                          | 0.007                                      | 0.094   | 0.034  | 0.111  | 0.064  | 0.004  | 0.000   | 0.000   |
|                                            | CGA368208                         | 5.510                                      | 6.583   | 3.739  | 3.036  | 5.741  | 2.322  | 6.283   | 10.427  |
|                                            | CGA37735                          | 0.087                                      | 0.119   | 0.063  | 0.055  | 0.084  | 0.034  | 0.078   | 0.147   |
|                                            | CGA50720                          | 5.727                                      | 9.410   | 4.299  | 4.229  | 4.757  | 3.060  | 4.253   | 7.850   |
| CGA357704                                  | 94.448                            | 134.311                                    | 73.172  | 67.660 | 81.521 | 38.057 | 60.957 | 137.912 |         |
| Maize, pre-emergence, 1440 g/ha, biennial  | S-metolachlor                     | 0.001                                      | 0.020   | 0.010  | 0.026  | 0.010  | 0.001  | 0.000   | 0.000   |
|                                            | NOA436611                         | 17.268                                     | 31.335  | 18.269 | 14.598 | 19.649 | 7.057  | 19.316  | 34.322  |
|                                            | CGA354743 (ESA)                   | 31.436                                     | 57.515  | 33.423 | 25.974 | 38.935 | 13.484 | 50.015  | 74.653  |
|                                            | CGA51202 (OXA)                    | 22.982                                     | 39.785  | 24.229 | 20.032 | 25.418 | 9.492  | 22.060  | 43.350  |
|                                            | CGA40172                          | 0.000                                      | 0.011   | 0.003  | 0.017  | 0.006  | 0.000  | 0.000   | 0.000   |
|                                            | CGA368208                         | 1.818                                      | 3.769   | 1.884  | 1.414  | 2.731  | 0.858  | 4.006   | 5.500   |
|                                            | CGA37735                          | 0.031                                      | 0.057   | 0.033  | 0.026  | 0.039  | 0.012  | 0.047   | 0.074   |
|                                            | CGA50720                          | 2.155                                      | 4.712   | 2.262  | 1.935  | 2.352  | 1.041  | 2.612   | 3.754   |
| CGA357704                                  | 32.601                            | 76.103                                     | 37.067  | 30.233 | 39.022 | 14.348 | 43.327 | 65.541  |         |
| Maize, pre-emergence, 1440 g/ha, triennial | S-metolachlor                     | 0.001                                      | 0.013   | 0.007  | 0.015  | 0.008  | 0.001  | 0.000   | 0.000   |
|                                            | NOA436611                         | 15.036                                     | 16.633  | 12.790 | 9.936  | 12.283 | 6.144  | 10.701  | 29.412  |
|                                            | CGA354743 (ESA)                   | 28.699                                     | 32.031  | 24.156 | 17.513 | 24.708 | 11.098 | 32.606  | 68.297  |
|                                            | CGA51202 (OXA)                    | 19.846                                     | 21.588  | 17.112 | 13.477 | 16.170 | 8.332  | 12.137  | 35.755  |
|                                            | CGA40172                          | 0.000                                      | 0.004   | 0.001  | 0.007  | 0.003  | 0.000  | 0.000   | 0.000   |
|                                            | CGA368208                         | 1.722                                      | 1.985   | 1.453  | 0.866  | 1.751  | 0.707  | 2.707   | 4.946   |
|                                            | CGA37735                          | 0.028                                      | 0.032   | 0.024  | 0.017  | 0.025  | 0.010  | 0.031   | 0.068   |
|                                            | CGA50720                          | 1.891                                      | 2.574   | 1.605  | 1.308  | 1.490  | 0.868  | 1.427   | 3.248   |
|                                            | CGA357704                         | 30.097                                     | 38.367  | 27.631 | 19.611 | 24.246 | 11.660 | 22.691  | 56.185  |
|                                            | SYN547977 <sup>1</sup> (ff = 0.1) | 3.830                                      | 5.812   | 3.713  | 5.012  | 4.147  | 2.281  | 0.439   | 2.700   |
| SYN547977 <sup>1</sup> (ff = 0.2572)       | 1.335                             | 2.057                                      | 1.313   | 1.798  | 1.476  | 0.797  | 0.138  | 0.924   |         |
| Maize, pre-emergence, 1250 g/ha, annual    | S-metolachlor                     | 0.004                                      | 0.042   | 0.016  | 0.051  | 0.029  | 0.005  | 0.000   | 0.001   |
|                                            | NOA436611                         | 41.752                                     | 56.082  | 30.863 | 27.175 | 36.702 | 18.656 | 28.114  | 61.434  |
|                                            | CGA354743 (ESA)                   | 77.861                                     | 102.565 | 55.777 | 48.505 | 70.595 | 32.825 | 71.608  | 128.632 |
|                                            | CGA51202 (OXA)                    | 52.777                                     | 73.875  | 41.104 | 36.546 | 47.176 | 24.701 | 34.382  | 77.766  |
|                                            | CGA40172                          | 0.004                                      | 0.061   | 0.020  | 0.076  | 0.042  | 0.002  | 0.000   | 0.000   |
|                                            | CGA368208                         | 4.794                                      | 5.737   | 3.253  | 2.642  | 4.993  | 2.022  | 5.463   | 9.059   |
|                                            | CGA37735                          | 0.076                                      | 0.103   | 0.055  | 0.048  | 0.073  | 0.029  | 0.067   | 0.127   |
|                                            | CGA50720                          | 4.964                                      | 8.217   | 3.744  | 3.686  | 4.120  | 2.675  | 3.691   | 6.804   |
| CGA357704                                  | 81.983                            | 116.595                                    | 63.516  | 58.732 | 70.763 | 33.037 | 52.937 | 119.710 |         |
| Maize, pre-emergence, 1250 g/ha, biennial  | S-metolachlor                     | 0.001                                      | 0.016   | 0.008  | 0.021  | 0.008  | 0.001  | 0.000   | 0.000   |
|                                            | NOA436611                         | 20.074                                     | 26.959  | 15.780 | 12.642 | 16.972 | 8.210  | 16.578  | 29.625  |
|                                            | CGA354743 (ESA)                   | 36.405                                     | 49.896  | 28.983 | 22.522 | 33.769 | 15.614 | 43.309  | 64.705  |
|                                            | CGA51202 (OXA)                    | 26.765                                     | 34.186  | 20.905 | 17.334 | 21.923 | 11.008 | 18.864  | 37.363  |
|                                            | CGA40172                          | 0.000                                      | 0.007   | 0.002  | 0.011  | 0.004  | 0.000  | 0.000   | 0.000   |
|                                            | CGA368208                         | 2.100                                      | 3.280   | 1.640  | 1.231  | 2.374  | 0.991  | 3.480   | 4.777   |

| Use pattern                                | Compound                             | PEC <sub>GW</sub> at 1 m soil depth [µg/L] |        |        |        |        |        |        |        |
|--------------------------------------------|--------------------------------------|--------------------------------------------|--------|--------|--------|--------|--------|--------|--------|
|                                            |                                      | Chât                                       | Ham    | Kre    | Oke    | Pia    | Por    | Sev    | Thi    |
|                                            | CGA37735                             | 0.035                                      | 0.050  | 0.028  | 0.022  | 0.034  | 0.014  | 0.041  | 0.064  |
|                                            | CGA50720                             | 2.487                                      | 4.118  | 1.969  | 1.688  | 2.044  | 1.196  | 2.264  | 3.255  |
|                                            | CGA357704                            | 37.717                                     | 66.064 | 32.175 | 26.244 | 33.874 | 16.576 | 37.629 | 56.891 |
| Maize, pre-emergence, 1250 g/ha, triennial | S-metolachlor                        | 0.001                                      | 0.010  | 0.005  | 0.012  | 0.007  | 0.001  | 0.000  | 0.000  |
|                                            | NOA436611                            | 12.952                                     | 14.316 | 11.056 | 8.592  | 10.605 | 5.318  | 9.182  | 25.354 |
|                                            | CGA354743 (ESA)                      | 24.898                                     | 27.752 | 20.931 | 15.191 | 21.417 | 9.629  | 28.202 | 59.197 |
|                                            | CGA51202 (OXA)                       | 17.122                                     | 18.602 | 14.773 | 11.642 | 13.969 | 7.205  | 10.421 | 30.747 |
|                                            | CGA40172                             | 0.000                                      | 0.003  | 0.000  | 0.005  | 0.002  | 0.000  | 0.000  | 0.000  |
|                                            | CGA368208                            | 1.500                                      | 1.730  | 1.264  | 0.755  | 1.522  | 0.615  | 2.351  | 4.293  |
|                                            | CGA37735                             | 0.024                                      | 0.028  | 0.021  | 0.015  | 0.022  | 0.009  | 0.027  | 0.059  |
|                                            | CGA50720                             | 1.647                                      | 2.243  | 1.398  | 1.141  | 1.295  | 0.758  | 1.237  | 2.813  |
|                                            | CGA357704                            | 26.125                                     | 33.305 | 23.985 | 17.024 | 21.047 | 10.122 | 19.706 | 48.768 |
|                                            | SYN547977 <sup>1</sup> (ff = 0.1)    | 1.137                                      | 1.758  | 1.121  | 1.539  | 1.259  | 0.680  | 0.116  | 0.784  |
|                                            | SYN547977 <sup>1</sup> (ff = 0.2572) | 3.267                                      | 4.972  | 3.174  | 4.293  | 3.552  | 1.948  | 0.369  | 2.296  |

<sup>1</sup> During the experts consultation (teleconference 28, 14-16 October 2020), the experts considered that in FOCUS simulation modelling for the active substance S-metolachlor a TSCF value of 0.3 would be appropriate for the crop maize and a value of 0.39 would be appropriate for other crops for which experimental data on those crops were not available. The experts also considered the available PEC<sub>GW</sub> values calculated with an TSCF value of 0.17 sufficient for a Tier 1 groundwater risk assessment. Therefore, only the PEC<sub>GW</sub> values for the relevant metabolite SYN547977 were recalculated by the RMS using the updated TSCF values and formation fractions.

**PEC<sub>GW</sub> of S-metolachlor, NOA436611, CGA354743, CGA51202, CGA368208, CGA37735, CGA40172, CGA50720 and CGA357704 from FOCUS PELMO 5.5.3 for post-emergent maize (TSCF = 0.17).**

| Use pattern                                 | Compound                             | PEC <sub>GW</sub> at 1 m soil depth [µg/L] |        |        |        |        |        |        |        |
|---------------------------------------------|--------------------------------------|--------------------------------------------|--------|--------|--------|--------|--------|--------|--------|
|                                             |                                      | Chât                                       | Ham    | Kre    | Oke    | Pia    | Por    | Sev    | Thi    |
| Maize, post-emergence, 1440 g/ha, annual    | S-metolachlor                        | 0.001                                      | 0.026  | 0.013  | 0.031  | 0.042  | 0.007  | <0.001 | <0.001 |
|                                             | NOA436611                            | 34.792                                     | 37.824 | 28.592 | 22.369 | 20.957 | 16.262 | 20.808 | 37.447 |
|                                             | CGA354743 (ESA)                      | 67.533                                     | 65.95  | 51.363 | 40.633 | 38.219 | 28.671 | 49.141 | 79.817 |
|                                             | CGA51202 (OXA)                       | 42.349                                     | 49.688 | 37.726 | 28.564 | 27.388 | 21.395 | 24.074 | 46.475 |
|                                             | CGA40172                             | <0.001                                     | 0.013  | 0.006  | 0.037  | 0.044  | 0.003  | <0.001 | <0.001 |
|                                             | CGA368208                            | 4.438                                      | 3.734  | 3.007  | 2.182  | 2.334  | 1.794  | 3.662  | 5.586  |
|                                             | CGA37735                             | 0.065                                      | 0.064  | 0.049  | 0.039  | 0.038  | 0.025  | 0.045  | 0.077  |
|                                             | CGA50720                             | 4.102                                      | 5.457  | 3.646  | 3.185  | 2.54   | 2.409  | 2.709  | 4.283  |
| CGA357704                                   | 70.557                               | 82.371                                     | 59.348 | 48.773 | 45.03  | 28.306 | 40.142 | 71.508 |        |
| Maize, post-emergence, 1440 g/ha, biennial  | S-metolachlor                        | <0.001                                     | 0.008  | 0.005  | 0.012  | 0.019  | 0.002  | <0.001 | <0.001 |
|                                             | NOA436611                            | 16.017                                     | 15.623 | 12.678 | 9.311  | 8.956  | 6.182  | 8.137  | 18.797 |
|                                             | CGA354743 (ESA)                      | 32.197                                     | 27.099 | 22.518 | 16.417 | 16.033 | 11.5   | 21.209 | 41.251 |
|                                             | CGA51202 (OXA)                       | 19.222                                     | 20.574 | 16.398 | 12.323 | 11.77  | 8.195  | 9.122  | 22.926 |
|                                             | CGA40172                             | <0.001                                     | 0.002  | 0.001  | 0.004  | 0.004  | 0      | <0.001 | <0.001 |
|                                             | CGA368208                            | 2.077                                      | 1.618  | 1.268  | 0.845  | 0.959  | 0.728  | 1.728  | 2.953  |
|                                             | CGA37735                             | 0.031                                      | 0.026  | 0.022  | 0.016  | 0.016  | 0.01   | 0.019  | 0.04   |
|                                             | CGA50720                             | 1.916                                      | 2.338  | 1.627  | 1.274  | 1.067  | 0.923  | 1.205  | 2.171  |
| CGA357704                                   | 38.236                               | 37.513                                     | 29.285 | 21.862 | 19.537 | 13.977 | 20.897 | 39.7   |        |
| Maize, post-emergence, 1440 g/ha, triennial | S-metolachlor                        | <0.001                                     | 0.005  | 0.004  | 0.008  | 0.011  | 0.001  | <0.001 | <0.001 |
|                                             | NOA436611                            | 11.097                                     | 11.607 | 9.725  | 7.115  | 6.567  | 4.49   | 6.39   | 13.999 |
|                                             | CGA354743 (ESA)                      | 22.069                                     | 21.184 | 18.958 | 12.186 | 11.861 | 8      | 16.376 | 32.758 |
|                                             | CGA51202 (OXA)                       | 13.941                                     | 15.197 | 12.387 | 9.376  | 8.728  | 5.922  | 7.492  | 17.249 |
|                                             | CGA40172                             | <0.001                                     | 0.001  | 0.001  | 0.003  | 0.003  | <0.001 | <0.001 | <0.001 |
|                                             | CGA368208                            | 1.459                                      | 1.285  | 1.176  | 0.602  | 0.723  | 0.53   | 1.297  | 2.378  |
|                                             | CGA37735                             | 0.021                                      | 0.021  | 0.018  | 0.012  | 0.012  | 0.007  | 0.015  | 0.032  |
|                                             | CGA50720                             | 1.355                                      | 1.757  | 1.288  | 0.969  | 0.777  | 0.667  | 0.935  | 1.618  |
| CGA357704                                   | 23.282                               | 24.354                                     | 20.877 | 13.833 | 12.371 | 8.312  | 13.512 | 25.942 |        |
| Maize, post-                                | SYN547977 <sup>1</sup> (ff = 0.1)    | 0.711                                      | 1.203  | 0.911  | 1.211  | 1.093  | 0.613  | 0.092  | 0.454  |
|                                             | SYN547977 <sup>1</sup> (ff = 0.2572) | 2.050                                      | 3.519  | 2.613  | 3.396  | 3.026  | 1.756  | 0.285  | 1.343  |
| Maize, post-                                | S-metolachlor                        | 0.001                                      | 0.021  | 0.01   | 0.025  | 0.034  | 0.005  | <0.001 | <0.001 |



| Use pattern                                 | Compound        | PEC <sub>GW</sub> at 1 m soil depth [µg/L] |        |        |        |        |        |        |        |
|---------------------------------------------|-----------------|--------------------------------------------|--------|--------|--------|--------|--------|--------|--------|
|                                             |                 | Chât                                       | Ham    | Kre    | Oke    | Pia    | Por    | Sev    | Thi    |
| emergence, 1250 g/ha, annual                | NOA436611       | 30.019                                     | 32.708 | 24.692 | 19.27  | 18.111 | 14.082 | 17.952 | 32.325 |
|                                             | CGA354743 (ESA) | 58.54                                      | 57.206 | 44.542 | 35.213 | 33.118 | 24.903 | 42.65  | 69.193 |
|                                             | CGA51202 (OXA)  | 36.312                                     | 42.923 | 32.665 | 24.627 | 23.651 | 18.478 | 20.784 | 40.154 |
|                                             | CGA40172        | <0.001                                     | 0.008  | 0.004  | 0.024  | 0.03   | 0.002  | <0.001 | <0.001 |
|                                             | CGA368208       | 3.859                                      | 3.25   | 2.617  | 1.899  | 2.029  | 1.563  | 3.181  | 4.853  |
|                                             | CGA37735        | 0.056                                      | 0.056  | 0.043  | 0.033  | 0.033  | 0.021  | 0.039  | 0.067  |
|                                             | CGA50720        | 3.56                                       | 4.767  | 3.174  | 2.775  | 2.208  | 2.105  | 2.361  | 3.715  |
|                                             | CGA357704       | 61.242                                     | 71.518 | 51.506 | 42.34  | 39.094 | 24.58  | 34.86  | 62.103 |
| Maize, post-emergence, 1250 g/ha, biennial  | S-metolachlor   | <0.001                                     | 0.01   | 0.006  | 0.015  | 0.024  | 0.003  | <0.001 | <0.001 |
|                                             | NOA436611       | 18.622                                     | 18.062 | 14.682 | 10.754 | 10.353 | 7.138  | 9.501  | 21.787 |
|                                             | CGA354743 (ESA) | 37.135                                     | 31.221 | 25.959 | 18.941 | 18.481 | 13.268 | 24.502 | 47.549 |
|                                             | CGA51202 (OXA)  | 22.312                                     | 23.827 | 19.017 | 14.28  | 13.621 | 9.535  | 10.637 | 26.605 |
|                                             | CGA40172        | <0.001                                     | 0.003  | 0.001  | 0.006  | 0.006  | 0.001  | <0.001 | <0.001 |
|                                             | CGA368208       | 2.387                                      | 1.86   | 1.456  | 0.97   | 1.102  | 0.837  | 1.99   | 3.403  |
|                                             | CGA37735        | 0.036                                      | 0.03   | 0.025  | 0.018  | 0.018  | 0.011  | 0.022  | 0.046  |
|                                             | CGA50720        | 2.212                                      | 2.674  | 1.868  | 1.459  | 1.225  | 1.058  | 1.388  | 2.502  |
| Maize, post-emergence, 1250 g/ha, triennial | CGA357704       | 33.198                                     | 32.568 | 25.425 | 18.983 | 16.959 | 12.136 | 18.149 | 34.46  |
|                                             | S-metolachlor   | <0.001                                     | 0.004  | 0.003  | 0.007  | 0.009  | 0.001  | <0.001 | <0.001 |
|                                             | NOA436611       | 9.566                                      | 10.029 | 8.383  | 6.15   | 5.684  | 3.886  | 5.499  | 12.078 |
|                                             | CGA354743 (ESA) | 19.127                                     | 18.359 | 16.429 | 10.574 | 10.289 | 6.944  | 14.194 | 28.408 |
|                                             | CGA51202 (OXA)  | 12.029                                     | 13.112 | 10.657 | 8.102  | 7.547  | 5.12   | 6.441  | 14.888 |
|                                             | CGA40172        | <0.001                                     | 0.001  | 0.001  | 0.002  | 0.003  | <0.001 | <0.001 | <0.001 |
|                                             | CGA368208       | 1.269                                      | 1.119  | 1.022  | 0.524  | 0.629  | 0.461  | 1.127  | 2.065  |
|                                             | CGA37735        | 0.018                                      | 0.018  | 0.016  | 0.01   | 0.01   | 0.006  | 0.013  | 0.028  |
|                                             | CGA50720        | 1.176                                      | 1.534  | 1.121  | 0.846  | 0.677  | 0.583  | 0.813  | 1.403  |
|                                             | CGA357704       | 20.213                                     | 21.153 | 18.125 | 12.011 | 10.741 | 7.217  | 11.736 | 22.521 |
| SYN547977 <sup>1</sup> (ff = 0.1)           | 0.605           | 1.022                                      | 0.777  | 1.035  | 0.936  | 0.522  | 0.078  | 0.385  |        |
| SYN547977 <sup>1</sup> (ff = 0.2572)        | 1.747           | 2.994                                      | 2.226  | 2.905  | 2.595  | 1.499  | 0.241  | 1.140  |        |

<sup>1</sup> During the experts consultation (teleconference 28, 14-16 October 2020), the experts considered that in FOCUS simulation modelling for the active substance S-metolachlor a TSCF value of 0.3 would be appropriate for the crop maize and a value of 0.39 would be appropriate for other crops for which experimental data on those crops were not available. The experts also considered the available PEC<sub>GW</sub> values calculated with an TSCF value of 0.17 sufficient for a Tier 1 groundwater risk assessment. Therefore, only the PEC<sub>GW</sub> values for the relevant metabolite SYN547977 were re-calculated by the RMS using the updated TSCF values and formation fractions.

**PEC<sub>GW</sub> of S-metolachlor, NOA436611, CGA354743, CGA51202, CGA368208, CGA37735, CGA40172, CGA50720 and CGA357704 from FOCUS PEARL 4.4 for post-emergence maize (TSCF = 0.17).**

| Use pattern                                | Compound        | PEC <sub>GW</sub> at 1 m soil depth [µg/L] |         |        |        |        |        |        |         |
|--------------------------------------------|-----------------|--------------------------------------------|---------|--------|--------|--------|--------|--------|---------|
|                                            |                 | Chât                                       | Ham     | Kre    | Oke    | Pia    | Por    | Sev    | Thi     |
| Maize, post-emergence, 1440 g/ha, annual   | S-metolachlor   | 0.003                                      | 0.034   | 0.013  | 0.041  | 0.024  | 0.004  | 0.000  | 0.000   |
|                                            | NOA436611       | 36.109                                     | 48.187  | 26.540 | 23.346 | 31.619 | 16.119 | 24.085 | 52.733  |
|                                            | CGA354743 (ESA) | 67.645                                     | 88.492  | 48.134 | 41.879 | 61.023 | 28.401 | 61.673 | 110.949 |
|                                            | CGA51202 (OXA)  | 45.434                                     | 63.359  | 35.288 | 31.467 | 40.465 | 21.175 | 29.310 | 66.756  |
|                                            | CGA40172        | 0.002                                      | 0.041   | 0.013  | 0.051  | 0.027  | 0.001  | 0.000  | 0.000   |
|                                            | CGA368208       | 4.149                                      | 4.974   | 2.814  | 2.285  | 4.322  | 1.752  | 4.717  | 7.831   |
|                                            | CGA37735        | 0.066                                      | 0.089   | 0.047  | 0.041  | 0.063  | 0.025  | 0.058  | 0.110   |
|                                            | CGA50720        | 4.307                                      | 7.144   | 3.250  | 3.199  | 3.552  | 2.330  | 3.188  | 5.869   |
| Maize, post-emergence, 1440 g/ha, biennial | CGA357704       | 71.563                                     | 100.841 | 54.876 | 50.786 | 61.190 | 28.575 | 45.649 | 103.428 |
|                                            | S-metolachlor   | 0.001                                      | 0.017   | 0.006  | 0.018  | 0.009  | 0.002  | 0.000  | 0.000   |
|                                            | NOA436611       | 17.268                                     | 21.623  | 13.222 | 11.296 | 13.163 | 7.118  | 12.373 | 31.006  |
|                                            | CGA354743 (ESA) | 31.704                                     | 41.204  | 24.241 | 19.858 | 27.062 | 13.301 | 33.937 | 70.154  |
|                                            | CGA51202 (OXA)  | 22.982                                     | 26.782  | 17.517 | 15.252 | 16.577 | 9.648  | 13.890 | 38.455  |
| CGA40172                                   | 0.000           | 0.006                                      | 0.001   | 0.008  | 0.002  | 0.000  | 0.000  | 0.000  |         |
| CGA368208                                  | 1.900           | 2.536                                      | 1.371   | 1.065  | 1.861  | 0.858  | 2.776  | 5.017  |         |

| Use pattern                                 | Compound                          | PEC <sub>GW</sub> at 1 m soil depth [µg/L] |        |        |        |        |        |        |        |
|---------------------------------------------|-----------------------------------|--------------------------------------------|--------|--------|--------|--------|--------|--------|--------|
|                                             |                                   | Chât                                       | Ham    | Kre    | Oke    | Pia    | Por    | Sev    | Thi    |
| Maize, post-emergence, 1440 g/ha, triennial | CGA37735                          | 0.031                                      | 0.041  | 0.024  | 0.020  | 0.028  | 0.012  | 0.032  | 0.070  |
|                                             | CGA50720                          | 2.165                                      | 3.456  | 1.681  | 1.493  | 1.606  | 1.041  | 1.742  | 3.412  |
|                                             | CGA357704                         | 33.177                                     | 48.610 | 26.907 | 22.871 | 30.221 | 13.978 | 26.651 | 58.074 |
|                                             | S-metolachlor                     | 0.001                                      | 0.010  | 0.005  | 0.010  | 0.005  | 0.001  | 0.000  | 0.000  |
|                                             | NOA436611                         | 11.443                                     | 15.148 | 9.960  | 7.424  | 8.938  | 4.750  | 8.812  | 21.285 |
|                                             | CGA354743 (ESA)                   | 21.620                                     | 28.671 | 17.899 | 13.369 | 17.948 | 8.621  | 23.344 | 49.411 |
|                                             | CGA51202 (OXA)                    | 15.119                                     | 19.301 | 13.369 | 9.992  | 11.937 | 6.379  | 10.074 | 25.973 |
|                                             | CGA40172                          | 0.000                                      | 0.002  | 0.000  | 0.003  | 0.001  | 0.000  | 0.000  | 0.000  |
|                                             | CGA368208                         | 1.317                                      | 1.617  | 1.013  | 0.657  | 1.286  | 0.525  | 1.909  | 3.601  |
|                                             | CGA37735                          | 0.021                                      | 0.029  | 0.018  | 0.013  | 0.018  | 0.008  | 0.022  | 0.049  |
| CGA50720                                    | 1.473                             | 2.312                                      | 1.251  | 1.001  | 1.090  | 0.682  | 1.302  | 2.404  |        |
| CGA357704                                   | 22.909                            | 32.930                                     | 19.317 | 14.809 | 17.540 | 9.090  | 21.290 | 42.257 |        |
| SYN547977 <sup>1</sup> (ff = 0.1)           | 0.961                             | 1.497                                      | 0.954  | 1.313  | 1.073  | 0.580  | 0.097  | 0.662  |        |
| SYN547977 <sup>1</sup> (ff = 0.2572)        | 2.776                             | 4.239                                      | 2.702  | 3.665  | 3.038  | 1.664  | 0.309  | 1.942  |        |
| Maize, post-emergence, 1250 g/ha, annual    | S-metolachlor                     | 0.003                                      | 0.028  | 0.011  | 0.033  | 0.019  | 0.003  | 0.000  | 0.000  |
|                                             | NOA436611                         | 30.869                                     | 41.600 | 22.928 | 20.139 | 27.268 | 13.969 | 20.734 | 45.490 |
|                                             | CGA354743 (ESA)                   | 58.278                                     | 76.697 | 41.726 | 36.300 | 52.943 | 24.665 | 53.501 | 96.174 |
|                                             | CGA51202 (OXA)                    | 38.803                                     | 54.602 | 30.439 | 27.198 | 34.879 | 18.225 | 25.225 | 57.580 |
|                                             | CGA40172                          | 0.001                                      | 0.027  | 0.007  | 0.034  | 0.017  | 0.001  | 0.000  | 0.000  |
|                                             | CGA368208                         | 3.611                                      | 4.335  | 2.449  | 1.989  | 3.759  | 1.526  | 4.101  | 6.803  |
|                                             | CGA37735                          | 0.057                                      | 0.077  | 0.041  | 0.036  | 0.055  | 0.022  | 0.050  | 0.095  |
|                                             | CGA50720                          | 3.712                                      | 6.239  | 2.836  | 2.788  | 3.076  | 2.037  | 2.767  | 5.086  |
|                                             | CGA357704                         | 61.488                                     | 87.540 | 47.634 | 44.085 | 53.115 | 24.806 | 39.644 | 89.778 |
|                                             | S-metolachlor                     | 0.001                                      | 0.014  | 0.005  | 0.015  | 0.007  | 0.001  | 0.000  | 0.000  |
| NOA436611                                   | 14.928                            | 18.508                                     | 11.418 | 9.772  | 11.323 | 6.162  | 10.598 | 26.740 |        |
| CGA354743 (ESA)                             | 27.504                            | 35.716                                     | 21.021 | 17.222 | 23.433 | 11.534 | 29.375 | 60.818 |        |
| CGA51202 (OXA)                              | 19.835                            | 23.014                                     | 15.106 | 13.169 | 14.275 | 8.345  | 11.867 | 33.108 |        |
| CGA40172                                    | 0.000                             | 0.004                                      | 0.000  | 0.005  | 0.001  | 0.000  | 0.000  | 0.000  |        |
| CGA368208                                   | 1.654                             | 2.210                                      | 1.194  | 0.927  | 1.617  | 0.746  | 2.411  | 4.357  |        |
| CGA37735                                    | 0.027                             | 0.036                                      | 0.021  | 0.017  | 0.024  | 0.010  | 0.028  | 0.060  |        |
| CGA50720                                    | 1.885                             | 3.015                                      | 1.463  | 1.304  | 1.392  | 0.908  | 1.511  | 2.956  |        |
| CGA357704                                   | 28.799                            | 42.198                                     | 23.356 | 19.853 | 26.231 | 12.134 | 23.144 | 50.409 |        |
| Maize, post-emergence, 1250 g/ha, triennial | S-metolachlor                     | 0.001                                      | 0.008  | 0.004  | 0.008  | 0.004  | 0.001  | 0.000  | 0.000  |
|                                             | NOA436611                         | 9.884                                      | 13.037 | 8.614  | 6.415  | 7.723  | 4.108  | 7.553  | 18.327 |
|                                             | CGA354743 (ESA)                   | 18.760                                     | 24.859 | 15.531 | 11.595 | 15.556 | 7.479  | 20.212 | 42.815 |
|                                             | CGA51202 (OXA)                    | 13.042                                     | 16.583 | 11.550 | 8.617  | 10.306 | 5.511  | 8.612  | 22.332 |
|                                             | CGA40172                          | 0.000                                      | 0.002  | 0.000  | 0.002  | 0.001  | 0.000  | 0.000  | 0.000  |
|                                             | CGA368208                         | 1.147                                      | 1.410  | 0.882  | 0.573  | 1.117  | 0.457  | 1.658  | 3.126  |
|                                             | CGA37735                          | 0.018                                      | 0.025  | 0.015  | 0.011  | 0.016  | 0.007  | 0.019  | 0.042  |
|                                             | CGA50720                          | 1.283                                      | 2.015  | 1.090  | 0.873  | 0.948  | 0.596  | 1.129  | 2.081  |
|                                             | CGA357704                         | 19.886                                     | 28.587 | 16.768 | 12.856 | 15.226 | 7.891  | 18.488 | 36.679 |
|                                             | SYN547977 <sup>1</sup> (ff = 0.1) | 0.817                                      | 1.279  | 0.814  | 1.123  | 0.917  | 0.495  | 0.081  | 0.562  |
| SYN547977 <sup>1</sup> (ff = 0.2572)        | 2.367                             | 3.625                                      | 2.309  | 3.139  | 2.602  | 1.421  | 0.259  | 1.651  |        |

<sup>1</sup> During the experts consultation (teleconference 28, 14-16 October 2020), the experts considered that in FOCUS simulation modelling for the active substance S-metolachlor a TSCF value of 0.3 would be appropriate for the crop maize and a value of 0.39 would be appropriate for other crops for which experimental data on those crops were not available. The experts also considered the available PEC<sub>GW</sub> values calculated with an TSCF value of 0.17 sufficient for a Tier 1 groundwater risk assessment. Therefore, only the PEC<sub>GW</sub> values for the relevant metabolite SYN547977 were recalculated by the RMS using the updated TSCF values and formation fractions.

**PEC<sub>GW</sub> of S-metolachlor, NOA436611, CGA354743, CGA51202, CGA368208, CGA37735, CGA40172, CGA50720 and CGA357704 from FOCUS PELMO 5.5.3 for pre-emergent sunflower (TSCF = 0.17).**

| Use pattern                                    | Compound                             | PEC <sub>GW</sub> at 1 m soil depth [µg/L] |         |
|------------------------------------------------|--------------------------------------|--------------------------------------------|---------|
|                                                |                                      | Piacenza                                   | Sevilla |
| Sunflower, pre-emergence, 1440 g/ha, annual    | S-metolachlor                        | 0.093                                      | <0.001  |
|                                                | NOA436611                            | 30.825                                     | 35.418  |
|                                                | CGA354743 (ESA)                      | 56.92                                      | 81.004  |
|                                                | CGA51202 (OXA)                       | 39.89                                      | 42.157  |
|                                                | CGA40172                             | 0.133                                      | <0.001  |
|                                                | CGA368208                            | 3.438                                      | 6.034   |
|                                                | CGA37735                             | 0.056                                      | 0.074   |
|                                                | CGA50720                             | 3.611                                      | 4.482   |
| Sunflower, pre-emergence, 1440 g/ha, biennial  | CGA357704                            | 67.08                                      | 67.977  |
|                                                | S-metolachlor                        | 0.038                                      | <0.001  |
|                                                | NOA436611                            | 15.6                                       | 16.905  |
|                                                | CGA354743 (ESA)                      | 27.925                                     | 42.7    |
|                                                | CGA51202 (OXA)                       | 20.439                                     | 19.184  |
|                                                | CGA40172                             | 0.019                                      | <0.001  |
|                                                | CGA368208                            | 1.678                                      | 3.317   |
|                                                | CGA37735                             | 0.027                                      | 0.039   |
| Sunflower, pre-emergence, 1440 g/ha, triennial | CGA50720                             | 1.81                                       | 2.333   |
|                                                | CGA357704                            | 29.721                                     | 35.414  |
|                                                | S-metolachlor                        | 0.033                                      | <0.001  |
|                                                | NOA436611                            | 9.626                                      | 10.872  |
|                                                | CGA354743 (ESA)                      | 17.624                                     | 28.593  |
|                                                | CGA51202 (OXA)                       | 12.748                                     | 12.664  |
|                                                | CGA40172                             | 0.01                                       | <0.001  |
|                                                | CGA368208                            | 1.072                                      | 2.229   |
|                                                | CGA37735                             | 0.017                                      | 0.026   |
|                                                | CGA50720                             | 1.108                                      | 1.444   |
| Sunflower, pre-emergence, 1250 g/ha, annual    | CGA357704                            | 18.481                                     | 21.629  |
|                                                | SYN547977 <sup>1</sup> (ff = 0.1)    | 1.521                                      | 0.159   |
|                                                | SYN547977 <sup>1</sup> (ff = 0.2572) | 4.215                                      | 0.479   |
|                                                | S-metolachlor                        | 0.076                                      | <0.001  |
|                                                | NOA436611                            | 26.595                                     | 30.675  |
|                                                | CGA354743 (ESA)                      | 49.32                                      | 70.306  |
|                                                | CGA51202 (OXA)                       | 34.461                                     | 36.146  |
|                                                | CGA40172                             | 0.092                                      | <0.001  |
| Sunflower, pre-emergence, 1250 g/ha, biennial  | CGA368208                            | 2.988                                      | 5.242   |
|                                                | CGA37735                             | 0.049                                      | 0.064   |
|                                                | CGA50720                             | 3.136                                      | 3.891   |
|                                                | CGA357704                            | 58.215                                     | 59.007  |
|                                                | S-metolachlor                        | 0.031                                      | <0.001  |
|                                                | NOA436611                            | 13.49                                      | 14.538  |
|                                                | CGA354743 (ESA)                      | 24.231                                     | 36.962  |
|                                                | CGA51202 (OXA)                       | 17.658                                     | 16.407  |
| Sunflower, pre-emergence, 1250 g/ha, triennial | CGA40172                             | 0.012                                      | <0.001  |
|                                                | CGA368208                            | 1.459                                      | 2.884   |
|                                                | CGA37735                             | 0.024                                      | 0.034   |
|                                                | CGA50720                             | 1.575                                      | 2.026   |
|                                                | CGA357704                            | 25.799                                     | 30.751  |
|                                                | S-metolachlor                        | 0.027                                      | <0.001  |
|                                                | NOA436611                            | 8.32                                       | 9.364   |
|                                                | CGA354743 (ESA)                      | 15.292                                     | 24.763  |
|                                                | CGA51202 (OXA)                       | 11.023                                     | 10.877  |
|                                                | CGA40172                             | 0.007                                      | <0.001  |
| Sunflower, pre-emergence, 1250 g/ha, annual    | CGA368208                            | 0.932                                      | 1.936   |
|                                                | CGA37735                             | 0.015                                      | 0.023   |
|                                                | CGA50720                             | 0.964                                      | 1.254   |
|                                                | CGA357704                            | 16.045                                     | 18.781  |
|                                                | SYN547977 <sup>1</sup> (ff = 0.1)    | 1.303                                      | 0.134   |
|                                                | SYN547977 <sup>1</sup> (ff = 0.2572) | 3.613                                      | 0.406   |

<sup>1</sup> During the experts consultation (teleconference 28, 14-16 October 2020), the experts considered that in FOCUS simulation modelling for the active substance S-metolachlor a TSCF value of 0.3 would be appropriate for the crop maize and a value of 0.39 would be appropriate for other crops for which experimental data on those crops were not available.

This means that for the representative uses on sunflower the TSCF of 0.39 can be used.

The experts also considered the available PEC<sub>GW</sub> values calculated with an TSCF value of 0.17 sufficient for a Tier 1 groundwater risk assessment. Therefore, only the PEC<sub>GW</sub> values for the relevant metabolite SYN547977 were re-calculated by the RMS using the updated TSCF values and formation fractions.

**PEC<sub>GW</sub> of S-metolachlor, NOA436611, CGA354743, CGA51202, CGA368208, CGA37735, CGA40172, CGA50720 and CGA357704 from FOCUS PEARL 4.4.4 for pre-emergent sunflower (TSCF = 0.17).**

| Use pattern                                    | Compound                          | PEC <sub>GW</sub> at 1 m soil depth [µg/L] |         |
|------------------------------------------------|-----------------------------------|--------------------------------------------|---------|
|                                                |                                   | Piacenza                                   | Sevilla |
| Sunflower, pre-emergence, 1440 g/ha, annual    | S-metolachlor                     | 0.027                                      | 0.000   |
|                                                | NOA436611                         | 54.928                                     | 31.720  |
|                                                | CGA354743 (ESA)                   | 112.035                                    | 78.066  |
|                                                | CGA51202 (OXA)                    | 69.060                                     | 38.467  |
|                                                | CGA40172                          | 0.056                                      | 0.000   |
|                                                | CGA368208                         | 8.049                                      | 6.227   |
|                                                | CGA37735                          | 0.116                                      | 0.073   |
|                                                | CGA50720                          | 6.039                                      | 4.094   |
| Sunflower pre-emergence, 1440 g/ha, biennial   | S-metolachlor                     | 0.009                                      | 0.000   |
|                                                | NOA436611                         | 20.547                                     | 18.673  |
|                                                | CGA354743 (ESA)                   | 42.123                                     | 45.865  |
|                                                | CGA51202 (OXA)                    | 26.435                                     | 21.959  |
|                                                | CGA40172                          | 0.007                                      | 0.000   |
|                                                | CGA368208                         | 3.060                                      | 3.596   |
|                                                | CGA37735                          | 0.043                                      | 0.043   |
|                                                | CGA50720                          | 2.392                                      | 2.487   |
| Sunflower, pre-emergence, 1440 g/ha, triennial | S-metolachlor                     | 0.009                                      | 0.000   |
|                                                | NOA436611                         | 13.133                                     | 10.619  |
|                                                | CGA354743 (ESA)                   | 27.339                                     | 32.126  |
|                                                | CGA51202 (OXA)                    | 17.294                                     | 12.288  |
|                                                | CGA40172                          | 0.003                                      | 0.000   |
|                                                | CGA368208                         | 1.997                                      | 2.560   |
|                                                | CGA37735                          | 0.028                                      | 0.030   |
|                                                | CGA50720                          | 1.575                                      | 1.427   |
|                                                | CGA357704                         | 26.779                                     | 22.191  |
|                                                | SYN547977 <sup>1</sup> (ff = 0.1) | 1.388                                      | 0.161   |
| SYN547977 <sup>1</sup> (ff = 0.2572)           | 3.866                             | 0.509                                      |         |
| Sunflower, pre-emergence, 1250 g/ha, annual    | S-metolachlor                     | 0.022                                      | 0.000   |
|                                                | NOA436611                         | 47.334                                     | 27.334  |
|                                                | CGA354743 (ESA)                   | 97.152                                     | 67.612  |
|                                                | CGA51202 (OXA)                    | 59.477                                     | 33.186  |
|                                                | CGA40172                          | 0.036                                      | 0.000   |
|                                                | CGA368208                         | 6.996                                      | 5.411   |
|                                                | CGA37735                          | 0.101                                      | 0.063   |
|                                                | CGA50720                          | 5.235                                      | 3.555   |
| Sunflower, pre-emergence, 1250 g/ha, biennial  | S-metolachlor                     | 0.007                                      | 0.000   |
|                                                | NOA436611                         | 17.758                                     | 16.040  |
|                                                | CGA354743 (ESA)                   | 36.539                                     | 39.719  |
|                                                | CGA51202 (OXA)                    | 22.819                                     | 18.819  |
|                                                | CGA40172                          | 0.004                                      | 0.000   |
|                                                | CGA368208                         | 2.661                                      | 3.124   |
|                                                | CGA37735                          | 0.037                                      | 0.037   |
|                                                | CGA50720                          | 2.077                                      | 2.157   |
| Sunflower, pre-emergence, 1250 g/ha, triennial | S-metolachlor                     | 0.007                                      | 0.000   |
|                                                | NOA436611                         | 11.326                                     | 9.124   |
|                                                | CGA354743 (ESA)                   | 23.687                                     | 27.828  |
|                                                | CGA51202 (OXA)                    | 14.924                                     | 10.534  |
|                                                | CGA40172                          | 0.002                                      | 0.000   |
|                                                | CGA368208                         | 1.735                                      | 2.224   |
|                                                | CGA37735                          | 0.024                                      | 0.026   |

| Use pattern | Compound                             | PEC <sub>GW</sub> at 1 m soil depth [µg/L] |         |
|-------------|--------------------------------------|--------------------------------------------|---------|
|             |                                      | Piacenza                                   | Sevilla |
|             | CGA50720                             | 1.367                                      | 1.235   |
|             | CGA357704                            | 23.244                                     | 19.266  |
|             | SYN547977 <sup>1</sup> (ff = 0.1)    | 1.188                                      | 0.135   |
|             | SYN547977 <sup>1</sup> (ff = 0.2572) | 3.313                                      | 0.428   |

<sup>1</sup> During the experts consultation (teleconference 28, 14-16 October 2020), the experts considered that in FOCUS simulation modelling for the active substance S-metolachlor a TSCF value of 0.3 would be appropriate for the crop maize and a value of 0.39 would be appropriate for other crops for which experimental data on those crops were not available. This means that for the representative uses on sunflower the TSCF of 0.39 can be used. The experts also considered the available PEC<sub>GW</sub> values calculated with an TSCF value of 0.17 sufficient for a Tier 1 groundwater risk assessment. Therefore, only the PEC<sub>GW</sub> values for the relevant metabolite SYN547977 were re-calculated by the RMS using the updated TSCF values and formation fractions.

### Lysimeter studies: Annual average concentrations in leachates (µg a.s. equivalents/L)

| Substance          | Lysimeter 17 (study 1)<br>1250 g/ha |                      |                      | Lysimeter 18 (study 1)<br>1250 g/ha |                      |                      | Lysimeter 3<br>(study 2)<br>1500 g/ha |
|--------------------|-------------------------------------|----------------------|----------------------|-------------------------------------|----------------------|----------------------|---------------------------------------|
|                    | 1 <sup>st</sup> year                | 2 <sup>nd</sup> year | 3 <sup>rd</sup> year | 1 <sup>st</sup> year                | 2 <sup>nd</sup> year | 3 <sup>rd</sup> year | 2 <sup>nd</sup> year                  |
| S-metolachlor      | 0.08                                | < 0.05               | < 0.05               | < 0.01                              | < 0.05               | < 0.05               | < 0.1                                 |
| CGA354743<br>(ESA) | 9.52                                | 9.10                 | 1.08                 | 16.93                               | 27.96                | 6.18                 | 29.3                                  |
| CGA51202 (OXA)     | 3.86                                | 1.80                 | 0.25                 | 4.76                                | 16.29                | 0.98                 | 24.1                                  |
| CGA368208          | 6.45                                | 3.96                 | 0.05                 | 7.31                                | 7.82                 | 2.73                 | 2.4                                   |
| CGA50720           | 1.22                                | 0.03                 | < 0.05               | 2.10                                | 4.71                 | < 0.05               | n.d.                                  |
| CGA357704          | n.d.                                | 0.19                 | 0.07                 | n.d.                                | 5.11                 | 0.40                 | 5.3                                   |
| CGA37735           | n.d.                                | 0.54                 | 0.16                 | n.d.                                | 0.98                 | 0.70                 | n.d.                                  |
| NOA413173          | n.d.                                | n.d.                 | n.d.                 | n.d.                                | n.d.                 | n.d.                 | 3.0                                   |
| NOA436611          | n.d.                                | n.d.                 | n.d.                 | n.d.                                | n.d.                 | n.d.                 | 1.8                                   |
| SYN542489          | n.d.                                | n.d.                 | n.d.                 | n.d.                                | n.d.                 | n.d.                 | 5.1                                   |
| SYN542488          | n.d.                                | n.d.                 | n.d.                 | n.d.                                | n.d.                 | n.d.                 | 0.8                                   |
| SYN542490          | n.d.                                | n.d.                 | n.d.                 | n.d.                                | n.d.                 | n.d.                 | 3.1                                   |
| SYN542491          | n.d.                                | n.d.                 | n.d.                 | n.d.                                | n.d.                 | n.d.                 | 1.2                                   |
| SYN542492          | n.d.                                | n.d.                 | n.d.                 | n.d.                                | n.d.                 | n.d.                 | 1.7                                   |
| SYN542607          | n.d.                                | n.d.                 | n.d.                 | n.d.                                | n.d.                 | n.d.                 | 2.4                                   |
| SYN547969          | n.d.                                | n.d.                 | n.d.                 | n.d.                                | n.d.                 | n.d.                 | 2.0                                   |
| SYN547977          | n.d.                                | n.d.                 | n.d.                 | n.d.                                | n.d.                 | n.d.                 | 0.1                                   |

### Field leaching studies: Annual average concentrations (µg/L)

| S-metolachlor                                                |                 | Annual average (µg/L) |                      |                      |                      |               |               |
|--------------------------------------------------------------|-----------------|-----------------------|----------------------|----------------------|----------------------|---------------|---------------|
| US field leaching study (calculated data at proposed EU GAP) | Year            | 1 <sup>st</sup> year  | 2 <sup>nd</sup> year | 3 <sup>rd</sup> year | 4 <sup>th</sup> year | -             | -             |
|                                                              | Lysimeter 0.9 m | <0.1                  | <0.1                 | <0.1                 | n.a.                 | -             | -             |
|                                                              | Lysimeter 1.8 m | 0.08                  | <0.1                 | <0.1                 | n.a.                 | -             | -             |
|                                                              | Lysimeter 2.7 m | 0.02                  | <0.1                 | <0.1                 | n.a.                 | -             | -             |
|                                                              | Lysimeter 4.0 m | 0.02                  | <0.1                 | <0.1                 | n.a.                 | -             | -             |
|                                                              | Shallow well    | <0.1                  | <0.1                 | <0.1                 | <0.1                 | -             | -             |
|                                                              | Deep well       | <0.1                  | <0.1                 | <0.1                 | <0.1                 | -             | -             |
| German field leaching study                                  | Year            | 5/1995-5/1996         | 5/1997-5/1998        | 5/1999-5/2000        | 5/2000-4/2001        | 5/2002-4/2003 | 6/2003-4/2004 |
|                                                              | Well B1         | < 0.05                | < 0.05               | < 0.05               | < 0.05               | < 0.05        | < 0.05        |

| Metabolite OXA                                               |                 | Annual average (µg/L)      |                            |                            |                            |                      |                      |
|--------------------------------------------------------------|-----------------|----------------------------|----------------------------|----------------------------|----------------------------|----------------------|----------------------|
| US field leaching study (calculated data at proposed EU GAP) | Year            | <b>1<sup>st</sup> year</b> | <b>2<sup>nd</sup> year</b> | <b>3<sup>rd</sup> year</b> | <b>4<sup>th</sup> year</b> | -                    | -                    |
|                                                              | Lysimeter 0.9 m | 0.5                        | <0.1                       | <0.1                       | n.a.                       | -                    | -                    |
|                                                              | Lysimeter 1.8 m | 6.1                        | <0.1                       | <0.1                       | n.a.                       | -                    | -                    |
|                                                              | Lysimeter 2.7 m | 3.2                        | 0.6                        | <0.1                       | n.a.                       | -                    | -                    |
|                                                              | Lysimeter 4.0 m | 2.1                        | 1.2                        | <0.1                       | n.a.                       | -                    | -                    |
|                                                              | Shallow well    | 0.1                        | 0.9                        | 0.2                        | <0.1                       | -                    | -                    |
|                                                              | Deep well       | <0.1                       | 0.1                        | <0.1                       | <0.1                       | -                    | -                    |
| German field leaching study                                  | Year            | <b>5/1995-5/1996</b>       | <b>5/1997-5/1998</b>       | <b>5/1999-5/2000</b>       | <b>5/2000-4/2001</b>       | <b>5/2002-4/2003</b> | <b>6/2003-4/2004</b> |
|                                                              | Well B9         | 3.85                       | 7.46                       | 7.73                       | 9.02                       | 10.47                | 10.73                |

| Metabolite ESA                                               |                 | Annual average (µg/L)      |                            |                            |                            |                      |                      |
|--------------------------------------------------------------|-----------------|----------------------------|----------------------------|----------------------------|----------------------------|----------------------|----------------------|
| US field leaching study (calculated data at proposed EU GAP) | Year            | <b>1<sup>st</sup> year</b> | <b>2<sup>nd</sup> year</b> | <b>3<sup>rd</sup> year</b> | <b>4<sup>th</sup> year</b> | -                    | -                    |
|                                                              | Lysimeter 0.9 m | 1.6                        | <0.1                       | <0.1                       | n.a.                       | -                    | -                    |
|                                                              | Lysimeter 1.8 m | 12.4                       | 0.7                        | 0.1                        | n.a.                       | -                    | -                    |
|                                                              | Lysimeter 2.7 m | 7.0                        | 2.8                        | 0.1                        | n.a.                       | -                    | -                    |
|                                                              | Lysimeter 4.0 m | 5.7                        | 5.5                        | 0.3                        | n.a.                       | -                    | -                    |
|                                                              | Shallow well    | 0.3                        | 2.5                        | 1.9                        | 0.2                        | -                    | -                    |
|                                                              | Deep well       | <0.1                       | 0.1                        | 0.3                        | <0.1                       | -                    | -                    |
| German field leaching study                                  | Year            | <b>5/1995-5/1996</b>       | <b>5/1997-5/1998</b>       | <b>5/1999-5/2000</b>       | <b>5/2000-4/2001</b>       | <b>5/2002-4/2003</b> | <b>6/2003-4/2004</b> |
|                                                              | Well B1         | 0.11                       | 0.1                        | 0.42                       | 1.06                       | 26.47                | 19.70                |
|                                                              | Well B4         | 9.32                       | 6.42                       | 9.63                       | 14.51                      | 14.58                | 22.31                |
|                                                              | Well B5         | 20.12                      | 21.71                      | 32.99                      | 34.79                      | 17.48                | 26.89                |
|                                                              | Well B6         | 12.08                      | 13.25                      | 17.35                      | 16.67                      | 19.00                | 29.63                |
|                                                              | Well B9         | 19.13                      | 20.67                      | 20.98                      | 26.79                      | 25.97                | 23.69                |

### PEC surface water and PEC sediment (Regulation (EU) N° 284/2013, Annex Part A, points 9.2.5 / 9.3.1)

Parent

Parameters used in FOCUSsw step 1-4

|                                                                                                                                                                                                                                                                                                                                                                          |
|--------------------------------------------------------------------------------------------------------------------------------------------------------------------------------------------------------------------------------------------------------------------------------------------------------------------------------------------------------------------------|
| Version control no. of FOCUS calculator:<br>Molecular weight: 283.8<br>Water solubility: 480<br>DT <sub>50</sub> soil: 30.1<br>K <sub>FOC</sub> : 200 mL/g<br>DT <sub>50</sub> Total system: 43.3 d<br>DT <sub>50</sub> water: 43.3 (Step 1/2 and 3) and 1000 d (Step 3)<br>DT <sub>50</sub> sediment: 43.3 (Step 1/2 and 3/4) and 1000 d (Step 3)<br>Vapour pressure: 0 |
|--------------------------------------------------------------------------------------------------------------------------------------------------------------------------------------------------------------------------------------------------------------------------------------------------------------------------------------------------------------------------|

|                                                         | <p>Freundlich exponent (1/n): 0.93</p> <p>TSCF: 0.3 (maize) / 0.39 (other crops for which experimental data is not available)<sup>1</sup></p> <p><sup>1</sup> The simulations were performed by the applicant with a TSCF value of 0.39. During the expert's consultation (teleconference 28, 14-16 October 2020), the experts considered that in FOCUS simulation modelling for the active substance S-metolachlor a TSCF value of 0.3 would be appropriate for the crop maize and a value of 0.39 would be appropriate for other crops for which experimental data on those crops were not available. However, the RMS performed PEC<sub>sw</sub>/sed simulations with a TSCF value of 0 in order to check the impact of this parameter on the resulting PEC values. The results obtained differed only slightly from the values simulated by the notifier using a TSCF value of 0.39. Therefore, the RMS decided not to repeat the PEC simulations with adjusted TSCF values. For future FOCUS simulations TSCF values of 0.3 (maize) and 0.39 (other crops for which experimental data is not available) should be used.</p>                                                                                                                                                                                                                                                                                                                                                                                                                                                                                                                                                                                                                                                                                                                                                                                                                                                                                                                       |                                  |                                 |                                  |                                 |               |    |              |              |    |              |              |    |              |              |    |             |              |    |              |              |    |              |              |    |              |              |    |             |              |                   |    |              |              |    |              |              |    |             |              |    |             |              |               |    |             |               |    |             |               |    |             |               |    |              |              |    |             |               |    |             |               |    |             |               |    |              |              |
|---------------------------------------------------------|--------------------------------------------------------------------------------------------------------------------------------------------------------------------------------------------------------------------------------------------------------------------------------------------------------------------------------------------------------------------------------------------------------------------------------------------------------------------------------------------------------------------------------------------------------------------------------------------------------------------------------------------------------------------------------------------------------------------------------------------------------------------------------------------------------------------------------------------------------------------------------------------------------------------------------------------------------------------------------------------------------------------------------------------------------------------------------------------------------------------------------------------------------------------------------------------------------------------------------------------------------------------------------------------------------------------------------------------------------------------------------------------------------------------------------------------------------------------------------------------------------------------------------------------------------------------------------------------------------------------------------------------------------------------------------------------------------------------------------------------------------------------------------------------------------------------------------------------------------------------------------------------------------------------------------------------------------------------------------------------------------------------------------------------------------|----------------------------------|---------------------------------|----------------------------------|---------------------------------|---------------|----|--------------|--------------|----|--------------|--------------|----|--------------|--------------|----|-------------|--------------|----|--------------|--------------|----|--------------|--------------|----|--------------|--------------|----|-------------|--------------|-------------------|----|--------------|--------------|----|--------------|--------------|----|-------------|--------------|----|-------------|--------------|---------------|----|-------------|---------------|----|-------------|---------------|----|-------------|---------------|----|--------------|--------------|----|-------------|---------------|----|-------------|---------------|----|-------------|---------------|----|--------------|--------------|
| <p>Parameters used in FOCUSsw step 3 (if performed)</p> | <p>Version control no.'s of software: PRZM 4.3.1, MACRO 5.5.4 and TOXSWA 4.4.3. Step 4: SWAN 4.0.1</p> <p>Water solubility (mg/L): 480</p> <p>Vapour pressure: 0 Pa at 20 °C</p> <p>K<sub>FOC</sub>: 200mL/g</p> <p>1/n: 0.93</p> <p>Q<sub>10</sub>=2.58, Walker equation coefficient 0.7</p> <p>Crop uptake factor: 0.39<sup>1</sup></p>                                                                                                                                                                                                                                                                                                                                                                                                                                                                                                                                                                                                                                                                                                                                                                                                                                                                                                                                                                                                                                                                                                                                                                                                                                                                                                                                                                                                                                                                                                                                                                                                                                                                                                              |                                  |                                 |                                  |                                 |               |    |              |              |    |              |              |    |              |              |    |             |              |    |              |              |    |              |              |    |              |              |    |             |              |                   |    |              |              |    |              |              |    |             |              |    |             |              |               |    |             |               |    |             |               |    |             |               |    |              |              |    |             |               |    |             |               |    |             |               |    |              |              |
| <p>Application rate</p>                                 | <p>Crop and growth stage:<br/>                 Maize: BBCH 00-10 and 10-18<br/>                 Sunflower: BBCH 00-10</p> <p>Number of applications: 1</p> <p>Application rate(s):<br/>                 BBCH 00-09: 1440, 1250 g a.s./ha<br/>                 BBCH 10-18: 1440, 1250, g a.s./ha</p> <p>Application window:</p> <table border="1"> <thead> <tr> <th>Growth stage [approx. BBCH]</th> <th>Scenario</th> <th>First date of application window</th> <th>Last date of application window</th> </tr> </thead> <tbody> <tr> <td rowspan="8">Maize BBCH 00</td> <td>D3</td> <td>21-Apr (111)</td> <td>21-May (141)</td> </tr> <tr> <td>D4</td> <td>26-Apr (116)</td> <td>26-May (146)</td> </tr> <tr> <td>D5</td> <td>26-Apr (116)</td> <td>26-May (146)</td> </tr> <tr> <td>D6</td> <td>06-Apr (96)</td> <td>06-May (126)</td> </tr> <tr> <td>R1</td> <td>19-Apr (109)</td> <td>19-May (139)</td> </tr> <tr> <td>R2</td> <td>17-Apr (107)</td> <td>17-May (137)</td> </tr> <tr> <td>R3</td> <td>17-Apr (107)</td> <td>17-May (137)</td> </tr> <tr> <td>R4</td> <td>27-Mar (86)</td> <td>26-Apr (116)</td> </tr> <tr> <td rowspan="4">Sunflower BBCH 00</td> <td>D5</td> <td>17-Apr (107)</td> <td>17-May (137)</td> </tr> <tr> <td>R1</td> <td>17-Apr (107)</td> <td>17-May (137)</td> </tr> <tr> <td>R3</td> <td>01-Apr (91)</td> <td>01-May (121)</td> </tr> <tr> <td>R4</td> <td>16-Mar (75)</td> <td>15-Apr (105)</td> </tr> <tr> <td rowspan="8">Maize BBCH 10</td> <td>D3</td> <td>09-May(129)</td> <td>08-June (159)</td> </tr> <tr> <td>D4</td> <td>14-May(134)</td> <td>13-June (164)</td> </tr> <tr> <td>D5</td> <td>13-May(133)</td> <td>12-June (163)</td> </tr> <tr> <td>D6</td> <td>23-Apr (113)</td> <td>23-May (143)</td> </tr> <tr> <td>R1</td> <td>07-May(127)</td> <td>06-June (157)</td> </tr> <tr> <td>R2</td> <td>06-May(126)</td> <td>05-June (156)</td> </tr> <tr> <td>R3</td> <td>05-May(125)</td> <td>04-June (155)</td> </tr> <tr> <td>R4</td> <td>13-Apr (103)</td> <td>13-May (133)</td> </tr> </tbody> </table> | Growth stage [approx. BBCH]      | Scenario                        | First date of application window | Last date of application window | Maize BBCH 00 | D3 | 21-Apr (111) | 21-May (141) | D4 | 26-Apr (116) | 26-May (146) | D5 | 26-Apr (116) | 26-May (146) | D6 | 06-Apr (96) | 06-May (126) | R1 | 19-Apr (109) | 19-May (139) | R2 | 17-Apr (107) | 17-May (137) | R3 | 17-Apr (107) | 17-May (137) | R4 | 27-Mar (86) | 26-Apr (116) | Sunflower BBCH 00 | D5 | 17-Apr (107) | 17-May (137) | R1 | 17-Apr (107) | 17-May (137) | R3 | 01-Apr (91) | 01-May (121) | R4 | 16-Mar (75) | 15-Apr (105) | Maize BBCH 10 | D3 | 09-May(129) | 08-June (159) | D4 | 14-May(134) | 13-June (164) | D5 | 13-May(133) | 12-June (163) | D6 | 23-Apr (113) | 23-May (143) | R1 | 07-May(127) | 06-June (157) | R2 | 06-May(126) | 05-June (156) | R3 | 05-May(125) | 04-June (155) | R4 | 13-Apr (103) | 13-May (133) |
| Growth stage [approx. BBCH]                             | Scenario                                                                                                                                                                                                                                                                                                                                                                                                                                                                                                                                                                                                                                                                                                                                                                                                                                                                                                                                                                                                                                                                                                                                                                                                                                                                                                                                                                                                                                                                                                                                                                                                                                                                                                                                                                                                                                                                                                                                                                                                                                               | First date of application window | Last date of application window |                                  |                                 |               |    |              |              |    |              |              |    |              |              |    |             |              |    |              |              |    |              |              |    |              |              |    |             |              |                   |    |              |              |    |              |              |    |             |              |    |             |              |               |    |             |               |    |             |               |    |             |               |    |              |              |    |             |               |    |             |               |    |             |               |    |              |              |
| Maize BBCH 00                                           | D3                                                                                                                                                                                                                                                                                                                                                                                                                                                                                                                                                                                                                                                                                                                                                                                                                                                                                                                                                                                                                                                                                                                                                                                                                                                                                                                                                                                                                                                                                                                                                                                                                                                                                                                                                                                                                                                                                                                                                                                                                                                     | 21-Apr (111)                     | 21-May (141)                    |                                  |                                 |               |    |              |              |    |              |              |    |              |              |    |             |              |    |              |              |    |              |              |    |              |              |    |             |              |                   |    |              |              |    |              |              |    |             |              |    |             |              |               |    |             |               |    |             |               |    |             |               |    |              |              |    |             |               |    |             |               |    |             |               |    |              |              |
|                                                         | D4                                                                                                                                                                                                                                                                                                                                                                                                                                                                                                                                                                                                                                                                                                                                                                                                                                                                                                                                                                                                                                                                                                                                                                                                                                                                                                                                                                                                                                                                                                                                                                                                                                                                                                                                                                                                                                                                                                                                                                                                                                                     | 26-Apr (116)                     | 26-May (146)                    |                                  |                                 |               |    |              |              |    |              |              |    |              |              |    |             |              |    |              |              |    |              |              |    |              |              |    |             |              |                   |    |              |              |    |              |              |    |             |              |    |             |              |               |    |             |               |    |             |               |    |             |               |    |              |              |    |             |               |    |             |               |    |             |               |    |              |              |
|                                                         | D5                                                                                                                                                                                                                                                                                                                                                                                                                                                                                                                                                                                                                                                                                                                                                                                                                                                                                                                                                                                                                                                                                                                                                                                                                                                                                                                                                                                                                                                                                                                                                                                                                                                                                                                                                                                                                                                                                                                                                                                                                                                     | 26-Apr (116)                     | 26-May (146)                    |                                  |                                 |               |    |              |              |    |              |              |    |              |              |    |             |              |    |              |              |    |              |              |    |              |              |    |             |              |                   |    |              |              |    |              |              |    |             |              |    |             |              |               |    |             |               |    |             |               |    |             |               |    |              |              |    |             |               |    |             |               |    |             |               |    |              |              |
|                                                         | D6                                                                                                                                                                                                                                                                                                                                                                                                                                                                                                                                                                                                                                                                                                                                                                                                                                                                                                                                                                                                                                                                                                                                                                                                                                                                                                                                                                                                                                                                                                                                                                                                                                                                                                                                                                                                                                                                                                                                                                                                                                                     | 06-Apr (96)                      | 06-May (126)                    |                                  |                                 |               |    |              |              |    |              |              |    |              |              |    |             |              |    |              |              |    |              |              |    |              |              |    |             |              |                   |    |              |              |    |              |              |    |             |              |    |             |              |               |    |             |               |    |             |               |    |             |               |    |              |              |    |             |               |    |             |               |    |             |               |    |              |              |
|                                                         | R1                                                                                                                                                                                                                                                                                                                                                                                                                                                                                                                                                                                                                                                                                                                                                                                                                                                                                                                                                                                                                                                                                                                                                                                                                                                                                                                                                                                                                                                                                                                                                                                                                                                                                                                                                                                                                                                                                                                                                                                                                                                     | 19-Apr (109)                     | 19-May (139)                    |                                  |                                 |               |    |              |              |    |              |              |    |              |              |    |             |              |    |              |              |    |              |              |    |              |              |    |             |              |                   |    |              |              |    |              |              |    |             |              |    |             |              |               |    |             |               |    |             |               |    |             |               |    |              |              |    |             |               |    |             |               |    |             |               |    |              |              |
|                                                         | R2                                                                                                                                                                                                                                                                                                                                                                                                                                                                                                                                                                                                                                                                                                                                                                                                                                                                                                                                                                                                                                                                                                                                                                                                                                                                                                                                                                                                                                                                                                                                                                                                                                                                                                                                                                                                                                                                                                                                                                                                                                                     | 17-Apr (107)                     | 17-May (137)                    |                                  |                                 |               |    |              |              |    |              |              |    |              |              |    |             |              |    |              |              |    |              |              |    |              |              |    |             |              |                   |    |              |              |    |              |              |    |             |              |    |             |              |               |    |             |               |    |             |               |    |             |               |    |              |              |    |             |               |    |             |               |    |             |               |    |              |              |
|                                                         | R3                                                                                                                                                                                                                                                                                                                                                                                                                                                                                                                                                                                                                                                                                                                                                                                                                                                                                                                                                                                                                                                                                                                                                                                                                                                                                                                                                                                                                                                                                                                                                                                                                                                                                                                                                                                                                                                                                                                                                                                                                                                     | 17-Apr (107)                     | 17-May (137)                    |                                  |                                 |               |    |              |              |    |              |              |    |              |              |    |             |              |    |              |              |    |              |              |    |              |              |    |             |              |                   |    |              |              |    |              |              |    |             |              |    |             |              |               |    |             |               |    |             |               |    |             |               |    |              |              |    |             |               |    |             |               |    |             |               |    |              |              |
|                                                         | R4                                                                                                                                                                                                                                                                                                                                                                                                                                                                                                                                                                                                                                                                                                                                                                                                                                                                                                                                                                                                                                                                                                                                                                                                                                                                                                                                                                                                                                                                                                                                                                                                                                                                                                                                                                                                                                                                                                                                                                                                                                                     | 27-Mar (86)                      | 26-Apr (116)                    |                                  |                                 |               |    |              |              |    |              |              |    |              |              |    |             |              |    |              |              |    |              |              |    |              |              |    |             |              |                   |    |              |              |    |              |              |    |             |              |    |             |              |               |    |             |               |    |             |               |    |             |               |    |              |              |    |             |               |    |             |               |    |             |               |    |              |              |
| Sunflower BBCH 00                                       | D5                                                                                                                                                                                                                                                                                                                                                                                                                                                                                                                                                                                                                                                                                                                                                                                                                                                                                                                                                                                                                                                                                                                                                                                                                                                                                                                                                                                                                                                                                                                                                                                                                                                                                                                                                                                                                                                                                                                                                                                                                                                     | 17-Apr (107)                     | 17-May (137)                    |                                  |                                 |               |    |              |              |    |              |              |    |              |              |    |             |              |    |              |              |    |              |              |    |              |              |    |             |              |                   |    |              |              |    |              |              |    |             |              |    |             |              |               |    |             |               |    |             |               |    |             |               |    |              |              |    |             |               |    |             |               |    |             |               |    |              |              |
|                                                         | R1                                                                                                                                                                                                                                                                                                                                                                                                                                                                                                                                                                                                                                                                                                                                                                                                                                                                                                                                                                                                                                                                                                                                                                                                                                                                                                                                                                                                                                                                                                                                                                                                                                                                                                                                                                                                                                                                                                                                                                                                                                                     | 17-Apr (107)                     | 17-May (137)                    |                                  |                                 |               |    |              |              |    |              |              |    |              |              |    |             |              |    |              |              |    |              |              |    |              |              |    |             |              |                   |    |              |              |    |              |              |    |             |              |    |             |              |               |    |             |               |    |             |               |    |             |               |    |              |              |    |             |               |    |             |               |    |             |               |    |              |              |
|                                                         | R3                                                                                                                                                                                                                                                                                                                                                                                                                                                                                                                                                                                                                                                                                                                                                                                                                                                                                                                                                                                                                                                                                                                                                                                                                                                                                                                                                                                                                                                                                                                                                                                                                                                                                                                                                                                                                                                                                                                                                                                                                                                     | 01-Apr (91)                      | 01-May (121)                    |                                  |                                 |               |    |              |              |    |              |              |    |              |              |    |             |              |    |              |              |    |              |              |    |              |              |    |             |              |                   |    |              |              |    |              |              |    |             |              |    |             |              |               |    |             |               |    |             |               |    |             |               |    |              |              |    |             |               |    |             |               |    |             |               |    |              |              |
|                                                         | R4                                                                                                                                                                                                                                                                                                                                                                                                                                                                                                                                                                                                                                                                                                                                                                                                                                                                                                                                                                                                                                                                                                                                                                                                                                                                                                                                                                                                                                                                                                                                                                                                                                                                                                                                                                                                                                                                                                                                                                                                                                                     | 16-Mar (75)                      | 15-Apr (105)                    |                                  |                                 |               |    |              |              |    |              |              |    |              |              |    |             |              |    |              |              |    |              |              |    |              |              |    |             |              |                   |    |              |              |    |              |              |    |             |              |    |             |              |               |    |             |               |    |             |               |    |             |               |    |              |              |    |             |               |    |             |               |    |             |               |    |              |              |
| Maize BBCH 10                                           | D3                                                                                                                                                                                                                                                                                                                                                                                                                                                                                                                                                                                                                                                                                                                                                                                                                                                                                                                                                                                                                                                                                                                                                                                                                                                                                                                                                                                                                                                                                                                                                                                                                                                                                                                                                                                                                                                                                                                                                                                                                                                     | 09-May(129)                      | 08-June (159)                   |                                  |                                 |               |    |              |              |    |              |              |    |              |              |    |             |              |    |              |              |    |              |              |    |              |              |    |             |              |                   |    |              |              |    |              |              |    |             |              |    |             |              |               |    |             |               |    |             |               |    |             |               |    |              |              |    |             |               |    |             |               |    |             |               |    |              |              |
|                                                         | D4                                                                                                                                                                                                                                                                                                                                                                                                                                                                                                                                                                                                                                                                                                                                                                                                                                                                                                                                                                                                                                                                                                                                                                                                                                                                                                                                                                                                                                                                                                                                                                                                                                                                                                                                                                                                                                                                                                                                                                                                                                                     | 14-May(134)                      | 13-June (164)                   |                                  |                                 |               |    |              |              |    |              |              |    |              |              |    |             |              |    |              |              |    |              |              |    |              |              |    |             |              |                   |    |              |              |    |              |              |    |             |              |    |             |              |               |    |             |               |    |             |               |    |             |               |    |              |              |    |             |               |    |             |               |    |             |               |    |              |              |
|                                                         | D5                                                                                                                                                                                                                                                                                                                                                                                                                                                                                                                                                                                                                                                                                                                                                                                                                                                                                                                                                                                                                                                                                                                                                                                                                                                                                                                                                                                                                                                                                                                                                                                                                                                                                                                                                                                                                                                                                                                                                                                                                                                     | 13-May(133)                      | 12-June (163)                   |                                  |                                 |               |    |              |              |    |              |              |    |              |              |    |             |              |    |              |              |    |              |              |    |              |              |    |             |              |                   |    |              |              |    |              |              |    |             |              |    |             |              |               |    |             |               |    |             |               |    |             |               |    |              |              |    |             |               |    |             |               |    |             |               |    |              |              |
|                                                         | D6                                                                                                                                                                                                                                                                                                                                                                                                                                                                                                                                                                                                                                                                                                                                                                                                                                                                                                                                                                                                                                                                                                                                                                                                                                                                                                                                                                                                                                                                                                                                                                                                                                                                                                                                                                                                                                                                                                                                                                                                                                                     | 23-Apr (113)                     | 23-May (143)                    |                                  |                                 |               |    |              |              |    |              |              |    |              |              |    |             |              |    |              |              |    |              |              |    |              |              |    |             |              |                   |    |              |              |    |              |              |    |             |              |    |             |              |               |    |             |               |    |             |               |    |             |               |    |              |              |    |             |               |    |             |               |    |             |               |    |              |              |
|                                                         | R1                                                                                                                                                                                                                                                                                                                                                                                                                                                                                                                                                                                                                                                                                                                                                                                                                                                                                                                                                                                                                                                                                                                                                                                                                                                                                                                                                                                                                                                                                                                                                                                                                                                                                                                                                                                                                                                                                                                                                                                                                                                     | 07-May(127)                      | 06-June (157)                   |                                  |                                 |               |    |              |              |    |              |              |    |              |              |    |             |              |    |              |              |    |              |              |    |              |              |    |             |              |                   |    |              |              |    |              |              |    |             |              |    |             |              |               |    |             |               |    |             |               |    |             |               |    |              |              |    |             |               |    |             |               |    |             |               |    |              |              |
|                                                         | R2                                                                                                                                                                                                                                                                                                                                                                                                                                                                                                                                                                                                                                                                                                                                                                                                                                                                                                                                                                                                                                                                                                                                                                                                                                                                                                                                                                                                                                                                                                                                                                                                                                                                                                                                                                                                                                                                                                                                                                                                                                                     | 06-May(126)                      | 05-June (156)                   |                                  |                                 |               |    |              |              |    |              |              |    |              |              |    |             |              |    |              |              |    |              |              |    |              |              |    |             |              |                   |    |              |              |    |              |              |    |             |              |    |             |              |               |    |             |               |    |             |               |    |             |               |    |              |              |    |             |               |    |             |               |    |             |               |    |              |              |
|                                                         | R3                                                                                                                                                                                                                                                                                                                                                                                                                                                                                                                                                                                                                                                                                                                                                                                                                                                                                                                                                                                                                                                                                                                                                                                                                                                                                                                                                                                                                                                                                                                                                                                                                                                                                                                                                                                                                                                                                                                                                                                                                                                     | 05-May(125)                      | 04-June (155)                   |                                  |                                 |               |    |              |              |    |              |              |    |              |              |    |             |              |    |              |              |    |              |              |    |              |              |    |             |              |                   |    |              |              |    |              |              |    |             |              |    |             |              |               |    |             |               |    |             |               |    |             |               |    |              |              |    |             |               |    |             |               |    |             |               |    |              |              |
|                                                         | R4                                                                                                                                                                                                                                                                                                                                                                                                                                                                                                                                                                                                                                                                                                                                                                                                                                                                                                                                                                                                                                                                                                                                                                                                                                                                                                                                                                                                                                                                                                                                                                                                                                                                                                                                                                                                                                                                                                                                                                                                                                                     | 13-Apr (103)                     | 13-May (133)                    |                                  |                                 |               |    |              |              |    |              |              |    |              |              |    |             |              |    |              |              |    |              |              |    |              |              |    |             |              |                   |    |              |              |    |              |              |    |             |              |    |             |              |               |    |             |               |    |             |               |    |             |               |    |              |              |    |             |               |    |             |               |    |             |               |    |              |              |



**Overall initial PEC<sub>SW</sub> and PEC<sub>SED</sub> of S-metolachlor (Steps 1-2)**

| Crop                                      | Step | Number of applications | Region (Timing)        | Max. PEC <sub>SW</sub> [µg/L] | Max. PEC <sub>SED</sub> [µg/kg] |
|-------------------------------------------|------|------------------------|------------------------|-------------------------------|---------------------------------|
| Maize<br>(1 x 1440 g a.s./ha, BBCH 00-10) | 1    | 1                      |                        | 392.19                        | 766.44                          |
|                                           | 2    | 1                      | North Europe (Mar-May) | 79.67                         | 155.35                          |
|                                           |      | 1                      | South Europe (Mar-May) | 148.79                        | 291.39                          |

**Global maximum Predicted Environmental Concentrations of S-metolachlor in surface water at Step 3 following pre-emergence applications to maize**

| Application rate and timing [g a.s./ha]                                                        | Scenario | Water body | PEC <sub>SW</sub> [µg/L] | PEC <sub>SED</sub> [µg/L] | Main route of entry to water body for max. PEC <sub>SW</sub> |
|------------------------------------------------------------------------------------------------|----------|------------|--------------------------|---------------------------|--------------------------------------------------------------|
| Maize<br>1 x 1440g<br>BBCH 0<br>DT <sub>50</sub> , water 43.3d<br>DT <sub>50</sub> , sed 1000d | D3       | Ditch      | 7.55                     | 2.10                      | Drift                                                        |
|                                                                                                | D4       | Pond       | 0.894                    | 2.83                      | Drainage                                                     |
|                                                                                                | D4       | Stream     | 6.26                     | 1.18                      | Drift                                                        |
|                                                                                                | D5       | Pond       | 0.585                    | 2.13                      | Drift                                                        |
|                                                                                                | D5       | Stream     | 6.83                     | 0.883                     | Drift                                                        |
|                                                                                                | D6       | Ditch      | 7.58                     | 2.40                      | Drift                                                        |
|                                                                                                | R1       | Pond       | 0.702                    | 1.62                      | Run-off                                                      |
|                                                                                                | R1       | Stream     | 19.5                     | 4.08                      | Run-off                                                      |
|                                                                                                | R2       | Stream     | 15.2                     | 3.69                      | Run-off                                                      |
|                                                                                                | R3       | Stream     | 48.3                     | 41.9                      | Run-off                                                      |
| Maize<br>1 x 1440g<br>BBCH 0<br>DT <sub>50</sub> , water 1000d<br>DT <sub>50</sub> , sed 43.3d | D3       | Ditch      | 7.55                     | 2.1                       | Drift                                                        |
|                                                                                                | D4       | Pond       | 0.974                    | 2.85                      | Drainage                                                     |
|                                                                                                | D4       | Stream     | 6.26                     | 1.06                      | Drift                                                        |
|                                                                                                | D5       | Pond       | 0.683                    | 2.11                      | Drift                                                        |
|                                                                                                | D5       | Stream     | 6.83                     | 0.769                     | Drift                                                        |
|                                                                                                | D6       | Ditch      | 7.58                     | 2.37                      | Drift                                                        |
|                                                                                                | R1       | Pond       | 0.770                    | 1.70                      | Run-off                                                      |
|                                                                                                | R1       | Stream     | 19.6                     | 4.07                      | Run-off                                                      |
|                                                                                                | R2       | Stream     | 15.3                     | 3.68                      | Run-off                                                      |
|                                                                                                | R3       | Stream     | 48.3                     | 41.8                      | Run-off                                                      |
| Maize<br>1 x 1250g<br>BBCH 0<br>DT <sub>50</sub> , water 43.3d<br>DT <sub>50</sub> , sed 1000d | D3       | Ditch      | 6.55                     | 1.83                      | Drift                                                        |
|                                                                                                | D4       | Pond       | 0.775                    | 2.46                      | Drainage                                                     |
|                                                                                                | D4       | Stream     | 5.44                     | 1.03                      | Drift                                                        |
|                                                                                                | D5       | Pond       | 0.504                    | 1.85                      | Drift                                                        |
|                                                                                                | D5       | Stream     | 5.93                     | 0.760                     | Drift                                                        |
|                                                                                                | D6       | Ditch      | 6.58                     | 2.09                      | Drift                                                        |
|                                                                                                | R1       | Pond       | 0.612                    | 1.42                      | Run-off                                                      |
|                                                                                                | R1       | Stream     | 16.9                     | 3.54                      | Run-off                                                      |
|                                                                                                | R2       | Stream     | 13.2                     | 3.20                      | Run-off                                                      |
|                                                                                                | R3       | Stream     | 41.7                     | 36.6                      | Run-off                                                      |
| Maize<br>1 x 1250g<br>BBCH 0<br>DT <sub>50</sub> , water 1000d                                 | R4       | Stream     | 42.5                     | 12.5                      | Run-off                                                      |
|                                                                                                | D3       | Ditch      | 6.55                     | 1.83                      | Drift                                                        |
|                                                                                                | D4       | Pond       | 0.844                    | 2.48                      | Drainage                                                     |
|                                                                                                | D4       | Stream     | 5.44                     | 0.924                     | Drift                                                        |
|                                                                                                | D5       | Pond       | 0.589                    | 1.83                      | Drift                                                        |
|                                                                                                | D5       | Stream     | 5.93                     | 0.663                     | Drift                                                        |
| D6                                                                                             | Ditch    | 6.58       | 2.06                     | Drift                     |                                                              |

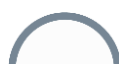



| Application rate and timing [g a.s./ha] | Scenario | Water body | PEC <sub>SW</sub> [µg/L] | PEC <sub>SED</sub> [µg/L] | Main route of entry to water body for max. PEC <sub>SW</sub> |
|-----------------------------------------|----------|------------|--------------------------|---------------------------|--------------------------------------------------------------|
| DT <sub>50</sub> , sed 43.3d            | R1       | Pond       | 0.673                    | 1.49                      | Run-off                                                      |
|                                         | R1       | Stream     | 16.9                     | 3.53                      | Run-off                                                      |
|                                         | R2       | Stream     | 13.2                     | 3.19                      | Run-off                                                      |
|                                         | R3       | Stream     | 41.7                     | 36.5                      | Run-off                                                      |
|                                         | R4       | Stream     | 42.5                     | 12.5                      | Run-off                                                      |

**Global maximum Predicted Environmental Concentrations of S-metolachlor in surface water at Step 3 following pre-emergence applications to sunflower**

| Application rate and timing [g a.s./ha]                                                            | Scenario | Water body | PEC <sub>SW</sub> [µg/L] | PEC <sub>SED</sub> [µg/L] | Main route of entry to water body for max. PEC <sub>SW</sub> |
|----------------------------------------------------------------------------------------------------|----------|------------|--------------------------|---------------------------|--------------------------------------------------------------|
| Sunflower<br>1 x 1440g<br>BBCH 0<br>DT <sub>50</sub> , water 43.3d<br>DT <sub>50</sub> , sed 1000d | D5       | Pond       | 0.534                    | 1.81                      | Drift                                                        |
|                                                                                                    | D5       | Stream     | 6.91                     | 0.811                     | Drift                                                        |
|                                                                                                    | R1       | Pond       | 0.774                    | 1.76                      | Run-off                                                      |
|                                                                                                    | R1       | Stream     | 17.5                     | 3.63                      | Run-off                                                      |
|                                                                                                    | R3       | Stream     | 50.3                     | 9.00                      | Run-off                                                      |
|                                                                                                    | R4       | Stream     | 45.6                     | 13.4                      | Run-off                                                      |
| Sunflower<br>1 x 1440g<br>BBCH 0<br>DT <sub>50</sub> , water 1000d<br>DT <sub>50</sub> , sed 43.3d | D5       | Pond       | 0.609                    | 1.78                      | Drift                                                        |
|                                                                                                    | D5       | Stream     | 6.91                     | 0.721                     | Drift                                                        |
|                                                                                                    | R1       | Pond       | 0.850                    | 1.85                      | Run-off                                                      |
|                                                                                                    | R1       | Stream     | 17.5                     | 3.62                      | Run-off                                                      |
|                                                                                                    | R3       | Stream     | 50.4                     | 8.89                      | Run-off                                                      |
|                                                                                                    | R4       | Stream     | 45.6                     | 13.4                      | Run-off                                                      |
| Sunflower<br>1 x 1250g<br>BBCH 0<br>DT <sub>50</sub> , water 43.3d<br>DT <sub>50</sub> , sed 1000d | D5       | Pond       | 0.461                    | 1.57                      | Drift                                                        |
|                                                                                                    | D5       | Stream     | 5.99                     | 0.700                     | Drift                                                        |
|                                                                                                    | R1       | Pond       | 0.674                    | 1.54                      | Run-off                                                      |
|                                                                                                    | R1       | Stream     | 15.1                     | 3.15                      | Run-off                                                      |
|                                                                                                    | R3       | Stream     | 43.4                     | 7.84                      | Run-off                                                      |
|                                                                                                    | R4       | Stream     | 39.4                     | 11.7                      | Run-off                                                      |
| Sunflower<br>1 x 1250g<br>BBCH 0<br>DT <sub>50</sub> , water 1000d<br>DT <sub>50</sub> , sed 43.3d | D5       | Pond       | 0.526                    | 1.54                      | Drift                                                        |
|                                                                                                    | D5       | Stream     | 5.99                     | 0.623                     | Drift                                                        |
|                                                                                                    | R1       | Pond       | 0.743                    | 1.63                      | Run-off                                                      |
|                                                                                                    | R1       | Stream     | 15.1                     | 3.14                      | Run-off                                                      |
|                                                                                                    | R3       | Stream     | 43.4                     | 7.74                      | Run-off                                                      |
|                                                                                                    | R4       | Stream     | 39.4                     | 11.6                      | Run-off                                                      |

**Global maximum Predicted Environmental Concentrations of S-metolachlor in surface water at Step 3 following post-emergence applications to maize**

| Application rate and timing [g a.s./ha]                                                         | Scenario | Water body | PEC <sub>SW</sub> [µg/L] | PEC <sub>SED</sub> [µg/L] | Main route of entry to water body for max. PEC <sub>SW</sub> |
|-------------------------------------------------------------------------------------------------|----------|------------|--------------------------|---------------------------|--------------------------------------------------------------|
| Maize<br>1 x 1440g<br>BBCH 11<br>DT <sub>50</sub> , water 43.3d<br>DT <sub>50</sub> , sed 1000d | D3       | Ditch      | 7.56                     | 2.22                      | Drift                                                        |
|                                                                                                 | D4       | Pond       | 1.17                     | 3.52                      | Drainage                                                     |
|                                                                                                 | D4       | Stream     | 6.50                     | 1.48                      | Drift                                                        |
|                                                                                                 | D5       | Pond       | 0.771                    | 2.91                      | Drainage                                                     |
|                                                                                                 | D5       | Stream     | 6.87                     | 1.08                      | Drift                                                        |
|                                                                                                 | D6       | Ditch      | 7.59                     | 2.39                      | Drift                                                        |
|                                                                                                 | R1       | Pond       | 1.28                     | 2.62                      | Run-off                                                      |
|                                                                                                 | R1       | Stream     | 22.4                     | 5.48                      | Run-off                                                      |
|                                                                                                 | R2       | Stream     | 16.2                     | 4.68                      | Run-off                                                      |
|                                                                                                 | R3       | Stream     | 43.0                     | 10.0                      | Run-off                                                      |
|                                                                                                 | R4       | Stream     | 50.8                     | 14.9                      | Run-off                                                      |

|                                                                                                 |    |        |       |       |          |
|-------------------------------------------------------------------------------------------------|----|--------|-------|-------|----------|
| Maize<br>1 x 1440g<br>BBCH 11<br>DT <sub>50</sub> , water 1000d<br>DT <sub>50</sub> , sed 43.3d | D3 | Ditch  | 7.56  | 2.23  | Drift    |
|                                                                                                 | D4 | Pond   | 1.27  | 3.60  | Drainage |
|                                                                                                 | D4 | Stream | 6.50  | 1.35  | Drift    |
|                                                                                                 | D5 | Pond   | 0.903 | 2.91  | Drainage |
|                                                                                                 | D5 | Stream | 6.87  | 0.859 | Drift    |
|                                                                                                 | D6 | Ditch  | 7.59  | 2.35  | Drift    |
|                                                                                                 | R1 | Pond   | 1.37  | 2.77  | Run-off  |
|                                                                                                 | R1 | Stream | 22.4  | 5.46  | Run-off  |
|                                                                                                 | R2 | Stream | 16.2  | 4.67  | Run-off  |
|                                                                                                 | R3 | Stream | 43.0  | 9.97  | Run-off  |
|                                                                                                 | R4 | Stream | 50.8  | 14.8  | Run-off  |
| Maize<br>1 x 1250g<br>BBCH 11<br>DT <sub>50</sub> , water 43.3d<br>DT <sub>50</sub> , sed 1000d | D3 | Ditch  | 6.56  | 1.94  | Drift    |
|                                                                                                 | D4 | Pond   | 1.02  | 3.06  | Drainage |
|                                                                                                 | D4 | Stream | 5.64  | 1.29  | Drift    |
|                                                                                                 | D5 | Pond   | 0.667 | 2.53  | Drainage |
|                                                                                                 | D5 | Stream | 5.96  | 0.93  | Drift    |
|                                                                                                 | D6 | Ditch  | 6.59  | 2.08  | Drift    |
|                                                                                                 | R1 | Pond   | 1.12  | 2.29  | Run-off  |
|                                                                                                 | R1 | Stream | 19.4  | 4.78  | Run-off  |
|                                                                                                 | R2 | Stream | 14.0  | 4.05  | Run-off  |
|                                                                                                 | R3 | Stream | 37.2  | 8.68  | Run-off  |
|                                                                                                 | R4 | Stream | 43.9  | 12.9  | Run-off  |
| Maize<br>1 x 1250g<br>BBCH 11<br>DT <sub>50</sub> , water 1000d<br>DT <sub>50</sub> , sed 43.3d | D3 | Ditch  | 6.56  | 1.94  | Drift    |
|                                                                                                 | D4 | Pond   | 1.10  | 3.13  | Drainage |
|                                                                                                 | D4 | Stream | 5.64  | 1.18  | Drift    |
|                                                                                                 | D5 | Pond   | 0.781 | 2.52  | Drainage |
|                                                                                                 | D5 | Stream | 5.96  | 0.740 | Drift    |
|                                                                                                 | D6 | Ditch  | 6.59  | 2.04  | Drift    |
|                                                                                                 | R1 | Pond   | 1.19  | 2.43  | Run-off  |
|                                                                                                 | R1 | Stream | 19.4  | 4.76  | Run-off  |
|                                                                                                 | R2 | Stream | 14.0  | 4.04  | Run-off  |
|                                                                                                 | R3 | Stream | 37.2  | 8.65  | Run-off  |
|                                                                                                 | R4 | Stream | 43.9  | 12.9  | Run-off  |

**Global Maximum Predicted Environmental Concentrations of S-metolachlor in surface water at Step 4; 10m Drift Buffer with a 60% run-off buffer and 20m Drift Buffer with a 80% run-off buffer following pre- emergence applications to maize**

| Application rate and timing [g a.s./ha]                                                        | Scenario | Water body | PEC <sub>sw</sub> [µg/L] |       |
|------------------------------------------------------------------------------------------------|----------|------------|--------------------------|-------|
| Spray-drift buffer                                                                             |          |            | 10 m                     | 20m   |
| Run-off mitigation                                                                             |          |            | 60%                      | 80%   |
| Maize<br>1 x 1440g<br>BBCH 0<br>DT <sub>50</sub> , water 43.3d<br>DT <sub>50</sub> , sed 1000d | D3       | Ditch      | 1.31                     | 0.682 |
|                                                                                                | D4       | Pond       | 0.890                    | 0.887 |
|                                                                                                | D4       | Stream     | 1.44                     | 1.10  |
|                                                                                                | D5       | Pond       | 0.511                    | 0.509 |
|                                                                                                | D5       | Stream     | 1.62                     | 0.890 |
|                                                                                                | D6       | Ditch      | 1.34                     | 0.714 |
|                                                                                                | R1       | Pond       | 0.34                     | 0.193 |
|                                                                                                | R1       | Stream     | 8.29                     | 4.23  |
|                                                                                                | R2       | Stream     | 6.83                     | 3.56  |
|                                                                                                | R3       | Stream     | 22.0                     | 11.6  |
|                                                                                                | R4       | Stream     | 22.3                     | 11.7  |
|                                                                                                | D3       | Ditch      | 1.31                     | 0.682 |

|                                                                                                   |        |        |       |       |
|---------------------------------------------------------------------------------------------------|--------|--------|-------|-------|
| Maize<br>1 x 1440g<br>BBCH 0<br>DT <sub>50</sub> , water<br>1000d<br>DT <sub>50</sub> , sed 43.3d | D4     | Pond   | 0.959 | 0.949 |
|                                                                                                   | D4     | Stream | 1.44  | 1.10  |
|                                                                                                   | D5     | Pond   | 0.603 | 0.593 |
|                                                                                                   | D5     | Stream | 1.62  | 0.890 |
|                                                                                                   | D6     | Ditch  | 1.35  | 0.714 |
|                                                                                                   | R1     | Pond   | 0.373 | 0.211 |
|                                                                                                   | R1     | Stream | 8.29  | 4.23  |
|                                                                                                   | R2     | Stream | 6.83  | 3.56  |
|                                                                                                   | R3     | Stream | 22.0  | 11.6  |
|                                                                                                   | R4     | Stream | 22.3  | 11.7  |
| Maize<br>1 x 1250g<br>BBCH 0<br>DT <sub>50</sub> , water 43.3d<br>DT <sub>50</sub> , sed 1000d    | D3     | Ditch  | 1.14  | 0.592 |
|                                                                                                   | D4     | Pond   | 0.772 | 0.769 |
|                                                                                                   | D4     | Stream | 1.25  | 0.954 |
|                                                                                                   | D5     | Pond   | 0.442 | 0.440 |
|                                                                                                   | D5     | Stream | 1.41  | 0.772 |
|                                                                                                   | D6     | Ditch  | 1.17  | 0.619 |
|                                                                                                   | R1     | Pond   | 0.297 | 0.168 |
|                                                                                                   | R1     | Stream | 7.16  | 3.66  |
|                                                                                                   | R2     | Stream | 5.89  | 3.07  |
|                                                                                                   | R3     | Stream | 19.0  | 9.99  |
| Maize<br>1 x 1250g<br>BBCH 0<br>DT <sub>50</sub> , water<br>1000d<br>DT <sub>50</sub> , sed 43.3d | D3     | Ditch  | 1.14  | 0.592 |
|                                                                                                   | D4     | Pond   | 0.832 | 0.823 |
|                                                                                                   | D4     | Stream | 1.25  | 0.954 |
|                                                                                                   | D5     | Pond   | 0.522 | 0.513 |
|                                                                                                   | D5     | Stream | 1.41  | 0.772 |
|                                                                                                   | D6     | Ditch  | 1.17  | 0.619 |
|                                                                                                   | R1     | Pond   | 0.326 | 0.184 |
|                                                                                                   | R1     | Stream | 7.17  | 3.66  |
|                                                                                                   | R2     | Stream | 5.89  | 3.07  |
|                                                                                                   | R3     | Stream | 19.0  | 9.99  |
| R4                                                                                                | Stream | 19.3   | 10.1  |       |

**Global Maximum Predicted Environmental Concentrations of S-metolachlor in surface water at Step 4; 10m Drift Buffer with a 60% run-off buffer and 20m Drift Buffer with a 80% run-off buffer following pre- emergence applications to sunflower**

| Application rate and timing [g a.s./ha]                                                            | Scenario | Water body | PEC <sub>SW</sub> [µg/L] |       |
|----------------------------------------------------------------------------------------------------|----------|------------|--------------------------|-------|
| Spray-drift buffer                                                                                 |          |            | 10 m                     | 20m   |
| Run-off mitigation                                                                                 |          |            | 60%                      | 80%   |
| Sunflower<br>1 x 1440g<br>BBCH 0<br>DT <sub>50</sub> , water 43.3d<br>DT <sub>50</sub> , sed 1000d | D5       | Pond       | 0.431                    | 0.419 |
|                                                                                                    | D5       | Stream     | 1.62                     | 0.879 |
|                                                                                                    | R1       | Pond       | 0.369                    | 0.207 |
|                                                                                                    | R1       | Stream     | 7.37                     | 3.75  |
|                                                                                                    | R3       | Stream     | 21.5                     | 11.0  |
|                                                                                                    | R4       | Stream     | 20.7                     | 10.9  |
| Sunflower<br>1 x 1440g<br>BBCH 0<br>DT <sub>50</sub> , water 1000d<br>DT <sub>50</sub> , sed 43.3d | D5       | Pond       | 0.508                    | 0.487 |
|                                                                                                    | D5       | Stream     | 1.62                     | 0.879 |
|                                                                                                    | R1       | Pond       | 0.405                    | 0.227 |
|                                                                                                    | R1       | Stream     | 7.37                     | 3.75  |
|                                                                                                    | R3       | Stream     | 21.5                     | 11.0  |
|                                                                                                    | R4       | Stream     | 20.7                     | 10.9  |
| Sunflower<br>1 x 1250g<br>BBCH 0<br>DT <sub>50</sub> , water 43.3d<br>DT <sub>50</sub> , sed 1000d | D5       | Pond       | 0.373                    | 0.363 |
|                                                                                                    | D5       | Stream     | 1.41                     | 0.763 |
|                                                                                                    | R1       | Pond       | 0.322                    | 0.181 |
|                                                                                                    | R1       | Stream     | 6.37                     | 3.24  |
|                                                                                                    | R3       | Stream     | 18.5                     | 9.47  |
|                                                                                                    | R4       | Stream     | 17.9                     | 9.39  |
| Sunflower<br>1 x 1250g<br>BBCH 0<br>DT <sub>50</sub> , water 1000d<br>DT <sub>50</sub> , sed 43.3d | D5       | Pond       | 0.439                    | 0.421 |
|                                                                                                    | D5       | Stream     | 1.41                     | 0.763 |
|                                                                                                    | R1       | Pond       | 0.355                    | 0.199 |
|                                                                                                    | R1       | Stream     | 6.37                     | 3.24  |
|                                                                                                    | R3       | Stream     | 18.6                     | 9.48  |
|                                                                                                    | R4       | Stream     | 17.9                     | 9.39  |

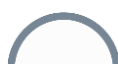

**Global Maximum Predicted Environmental Concentrations of S-metolachlor in surface water at Step 4; 10m Drift Buffer with a 60% run-off buffer and 20m Drift Buffer with a 80% run-off buffer following post- emergence applications to maize**

| Application rate and timing [g a.s./ha]                                                         | Scenario | Water body | PEC <sub>sw</sub> [µg/L] |       |
|-------------------------------------------------------------------------------------------------|----------|------------|--------------------------|-------|
| Spray-drift buffer                                                                              |          |            | 10 m                     | 20m   |
| Run-off mitigation                                                                              |          |            | 60%                      | 80%   |
| Maize<br>1 x 1440g<br>BBCH 11<br>DT <sub>50</sub> , water 43.3d<br>DT <sub>50</sub> , sed 1000d | D3       | Ditch      | 1.31                     | 0.682 |
|                                                                                                 | D4       | Pond       | 1.17                     | 1.16  |
|                                                                                                 | D4       | Stream     | 1.49                     | 1.47  |
|                                                                                                 | D5       | Pond       | 0.768                    | 0.765 |
|                                                                                                 | D5       | Stream     | 1.64                     | 0.911 |
|                                                                                                 | D6       | Ditch      | 1.35                     | 0.719 |
|                                                                                                 | R1       | Pond       | 0.577                    | 0.313 |
|                                                                                                 | R1       | Stream     | 10.1                     | 5.29  |
|                                                                                                 | R2       | Stream     | 7.15                     | 3.70  |
|                                                                                                 | R3       | Stream     | 19.4                     | 10.2  |
| Maize<br>1 x 1440g<br>BBCH 11<br>DT <sub>50</sub> , water 1000d<br>DT <sub>50</sub> , sed 43.3d | D3       | Ditch      | 1.31                     | 0.682 |
|                                                                                                 | D4       | Pond       | 1.25                     | 1.24  |
|                                                                                                 | D4       | Stream     | 1.49                     | 1.47  |
|                                                                                                 | D5       | Pond       | 0.887                    | 0.875 |
|                                                                                                 | D5       | Stream     | 1.64                     | 0.911 |
|                                                                                                 | D6       | Ditch      | 1.35                     | 0.719 |
|                                                                                                 | R1       | Pond       | 0.621                    | 0.338 |
|                                                                                                 | R1       | Stream     | 10.1                     | 5.29  |
|                                                                                                 | R2       | Stream     | 7.15                     | 3.70  |
|                                                                                                 | R3       | Stream     | 19.4                     | 10.2  |
| Maize<br>1 x 1250g<br>BBCH 11<br>DT <sub>50</sub> , water 43.3d<br>DT <sub>50</sub> , sed 1000d | D3       | Ditch      | 1.14                     | 0.593 |
|                                                                                                 | D4       | Pond       | 1.01                     | 1.01  |
|                                                                                                 | D4       | Stream     | 1.30                     | 1.27  |
|                                                                                                 | D5       | Pond       | 0.664                    | 0.662 |
|                                                                                                 | D5       | Stream     | 1.43                     | 0.790 |
|                                                                                                 | D6       | Ditch      | 1.17                     | 0.623 |
|                                                                                                 | R1       | Pond       | 0.504                    | 0.273 |
|                                                                                                 | R1       | Stream     | 8.78                     | 4.59  |
|                                                                                                 | R2       | Stream     | 6.16                     | 3.19  |
|                                                                                                 | R3       | Stream     | 16.8                     | 8.78  |
| Maize<br>1 x 1250g<br>BBCH 11                                                                   | D3       | Ditch      | 1.14                     | 0.593 |
|                                                                                                 | D4       | Pond       | 1.09                     | 1.08  |
|                                                                                                 | D4       | Stream     | 1.30                     | 1.27  |
|                                                                                                 | D5       | Pond       | 0.767                    | 0.756 |
|                                                                                                 | D5       | Stream     | 1.43                     | 0.790 |
|                                                                                                 | D6       | Ditch      | 1.17                     | 0.624 |



| Application rate and timing [g a.s./ha]                        | Scenario | Water body | PEC <sub>SW</sub> [µg/L] |       |
|----------------------------------------------------------------|----------|------------|--------------------------|-------|
| Spray-drift buffer                                             |          |            | 10 m                     | 20m   |
| Run-off mitigation                                             |          |            | 60%                      | 80%   |
| DT <sub>50</sub> , water 1000d<br>DT <sub>50</sub> , sed 43.3d | R1       | Pond       | 0.542                    | 0.295 |
|                                                                | R1       | Stream     | 8.78                     | 4.59  |
|                                                                | R2       | Stream     | 6.16                     | 3.19  |
|                                                                | R3       | Stream     | 16.8                     | 8.78  |
|                                                                | R4       | Stream     | 20.0                     | 10.5  |

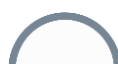

|                                                  |                                                                                                                                                                      |
|--------------------------------------------------|----------------------------------------------------------------------------------------------------------------------------------------------------------------------|
| Metabolites                                      | See separate input boxes below                                                                                                                                       |
| Parameters used in FOCUSsw step 1 and 2          |                                                                                                                                                                      |
| Parameters used in FOCUSsw step 3 (if performed) | Not applicable                                                                                                                                                       |
| Application rate                                 | Crop and growth stage: wheat BBCH 00-10<br>Number of applications: 1<br>Interval (d): -<br>Application rate(s): 1440 g a.s./ha<br>Application window: not applicable |

### Summary of input parameters for ESA (CGA354743) used in FOCUS Step 1 & 2 simulations

| Parameter                                        | Value  | Units | Notes                 |
|--------------------------------------------------|--------|-------|-----------------------|
| <b>ESA (CGA354743)</b>                           |        |       |                       |
| Molecular weight                                 | 329.4  | g/mol |                       |
| Water solubility                                 | 500000 | mg/L  | Assumed value         |
| Vapour pressure                                  | NA     | Pa    |                       |
| DT <sub>50</sub> soil                            | 235*   | d     | Geometric mean (n=11) |
| Maximum formation                                | 23.6   | %     |                       |
| K <sub>FOC</sub>                                 | 7      | L/kg  | Geometric mean (n=7)  |
| DT <sub>50</sub> Total system                    | 1000   | d     | FOCUS default         |
| DT <sub>50</sub> water                           | 1000   | d     | FOCUS default         |
| DT <sub>50</sub> sediment                        | 1000   | d     | FOCUS default         |
| Maximum formation in total water/sediment system | 8.5    |       |                       |

\*In future calculations 154.4 should be used  
NA – not applicable

### Summary of input parameters for OXA (CGA51202) used in FOCUS Step 1 & 2 simulations

| Parameter                                        | Value  | Units | Notes                 |
|--------------------------------------------------|--------|-------|-----------------------|
| <b>CGA51202</b>                                  |        |       |                       |
| Molecular weight                                 | 279.3  | g/mol |                       |
| Water solubility                                 | 360000 | mg/L  | 25°C                  |
| Vapour pressure                                  | NA     | Pa    |                       |
| DT <sub>50</sub> soil                            | 152*   | d     | Geometric mean (n=11) |
| Maximum formation                                | 21.1   | %     |                       |
| K <sub>FOC</sub>                                 | 12     | L/kg  | Geometric mean (n=7)  |
| DT <sub>50</sub> Total system                    | 1000   | d     | FOCUS default         |
| DT <sub>50</sub> water                           | 1000   | d     | FOCUS default         |
| DT <sub>50</sub> sediment                        | 1000   | d     | FOCUS default         |
| Maximum formation in total water/sediment system | 21.2   | %     |                       |

\*In future calculations 98.1 should be used  
NA – not applicable



**Summary of input parameters for CGA40172 used in FOCUS Step 1 & 2 simulations**

| Parameter                                        | Value  | Units | Notes                   |
|--------------------------------------------------|--------|-------|-------------------------|
| <b>CGA40172</b>                                  |        |       |                         |
| Molecular weight                                 | 265.3  | g/mol |                         |
| Water solubility                                 | 500000 | mg/L  | Conservative assumption |
| Vapour pressure                                  | NA     | Pa    |                         |
| DT <sub>50</sub> soil                            | 133    | d     | FOCUS default           |
| Maximum formation                                | 6.5    | %     |                         |
| K <sub>FOC</sub>                                 | 174    | L/kg  | Geometric mean (n=3)    |
| DT <sub>50</sub> Total system                    | 1000   | d     | FOCUS default           |
| DT <sub>50</sub> water                           | 1000   | d     | FOCUS default           |
| DT <sub>50</sub> sediment                        | 1000   | d     | FOCUS default           |
| Maximum formation in total water/sediment system | 0.01   | %     | Not observed            |

NA – not applicable

**Summary of input parameters for CGA50720 used in FOCUS Step 1 & 2 simulations**

| Parameter                                        | Value  | Units | Notes                   |
|--------------------------------------------------|--------|-------|-------------------------|
| <b>CGA50720</b>                                  |        |       |                         |
| Molecular weight                                 | 207.2  | g/mol |                         |
| Water solubility                                 | 210000 | mg/L  |                         |
| Vapour pressure                                  | NA     | Pa    |                         |
| DT <sub>50</sub> soil                            | 1000   | d     | FOCUS default           |
| Maximum formation                                | 8.2    | %     |                         |
| K <sub>FOC</sub>                                 | 1.0    | L/kg  | Conservative assumption |
| DT <sub>50</sub> Total system                    | 1000   | d     | FOCUS default           |
| DT <sub>50</sub> water                           | 1000   | d     | FOCUS default           |
| DT <sub>50</sub> sediment                        | 1000   | d     | FOCUS default           |
| Maximum formation in total water/sediment system | 0.01   | %     | Not observed            |

NA – not applicable

**Summary of input parameters for CGA368208 used in FOCUS Step 1 & 2 simulations**

| Parameter                                        | Value  | Units | Notes                   |
|--------------------------------------------------|--------|-------|-------------------------|
| <b>CGA368208</b>                                 |        |       |                         |
| Molecular weight                                 | 257.3  | g/mol |                         |
| Water solubility                                 | 500000 | mg/L  | Conservative assumption |
| Vapour pressure                                  | NA     | Pa    |                         |
| DT <sub>50</sub> soil                            | 1000   | d     | FOCUS default           |
| Maximum formation                                | 7.6    | %     |                         |
| K <sub>FOC</sub>                                 | 1.0    | L/kg  | Conservative assumption |
| DT <sub>50</sub> Total system                    | 1000   | d     | FOCUS default           |
| DT <sub>50</sub> water                           | 1000   | d     | FOCUS default           |
| DT <sub>50</sub> sediment                        | 1000   | d     | FOCUS default           |
| Maximum formation in total water/sediment system | 0.01   | %     | Not observed            |

NA – not applicable





**Summary of input parameters for CGA37735 used in FOCUS Step 1 & 2 simulations**

| Parameter                                        | Value  | Units | Notes                   |
|--------------------------------------------------|--------|-------|-------------------------|
| <b>CGA37735</b>                                  |        |       |                         |
| Molecular weight                                 | 193.2  | g/mol |                         |
| Water solubility                                 | 500000 | mg/L  | Conservative assumption |
| Vapour pressure                                  | NA     | Pa    |                         |
| DT <sub>50</sub> soil                            | 1000   | d     | FOCUS default           |
| Maximum formation                                | 7.1    | %     |                         |
| K <sub>FOC</sub>                                 | 10.3   | L/kg  | Geometric mean (n = 5)  |
| DT <sub>50</sub> Total system                    | 1000   | d     | FOCUS default           |
| DT <sub>50</sub> water                           | 1000   | d     | FOCUS default           |
| DT <sub>50</sub> sediment                        | 1000   | d     | FOCUS default           |
| Maximum formation in total water/sediment system | 0.01   | %     | Not observed            |

NA – not applicable

**Summary of input parameters for NOA436611 used in FOCUS Step 1 & 2 simulations**

| Parameter                                        | Value  | Units | Notes                   |
|--------------------------------------------------|--------|-------|-------------------------|
| <b>NOA436611</b>                                 |        |       |                         |
| Molecular weight                                 | 355.45 | g/mol |                         |
| Water solubility                                 | 500000 | mg/L  | Conservative assumption |
| Vapour pressure                                  | NA     | Pa    |                         |
| DT <sub>50</sub> soil                            | 1000   | d     | FOCUS default           |
| Maximum formation                                | 9.1    | %     |                         |
| K <sub>FOC</sub>                                 | 8.4    | L/kg  | Geometric mean (n = 5)  |
| DT <sub>50</sub> Total system                    | 1000   | d     | FOCUS default           |
| DT <sub>50</sub> water                           | 1000   | d     | FOCUS default           |
| DT <sub>50</sub> sediment                        | 1000   | d     | FOCUS default           |
| Maximum formation in total water/sediment system | 0.01   | %     | Not observed            |

NA – not applicable

**Summary of input parameters for CGA41507 used in FOCUS Step 1 & 2 simulations**

| Parameter                                        | Value | Units | Notes                  |
|--------------------------------------------------|-------|-------|------------------------|
| <b>CGA41507</b>                                  |       |       |                        |
| Molecular weight                                 | 244.3 | g/mol |                        |
| Water solubility                                 | 2600  | mg/L  | 25oC                   |
| Vapour pressure                                  | NA    | Pa    |                        |
| DT <sub>50</sub> soil                            | 1000  | d     | FOCUS default          |
| Maximum formation                                | 0.7   | %     |                        |
| K <sub>FOC</sub>                                 | 86.5  | L/kg  | Geometric mean (n = 3) |
| DT <sub>50</sub> Total system                    | 1000  | d     | FOCUS default          |
| DT <sub>50</sub> water                           | 1000  | d     | FOCUS default          |
| DT <sub>50</sub> sediment                        | 1000  | d     | FOCUS default          |
| Maximum formation in total water/sediment system | 17.8  | %     |                        |

NA – not applicable



**Summary of input parameters for CGA357704 used in FOCUS Step 1 & 2 simulations (RMS calculation)**

| Parameter                                        | Value  | Units | Notes                   |
|--------------------------------------------------|--------|-------|-------------------------|
| CGA357704                                        |        |       |                         |
| Molecular weight                                 | 279.30 | g/mol |                         |
| Water solubility                                 | 500000 | mg/L  | Conservative assumption |
| Vapour pressure                                  | NA     | Pa    |                         |
| DT <sub>50</sub> soil                            | 136    | d     |                         |
| Maximum formation                                | 21.9   | %     |                         |
| K <sub>FOC</sub>                                 | 1.0    | L/kg  | Conservative assumption |
| DT <sub>50</sub> Total system                    | 1000   | d     | FOCUS default           |
| DT <sub>50</sub> water                           | 1000   | d     | FOCUS default           |
| DT <sub>50</sub> sediment                        | 1000   | d     | FOCUS default           |
| Maximum formation in total water/sediment system | 0.01   | %     | Not observed            |

NA – not applicable

**Overall initial PEC<sub>SW</sub> and PEC<sub>SED</sub> of S-metolachlor (Steps 1-2)**

| Crop                                      | Step | Number of applications | Region (Timing)        | Max. PEC <sub>SW</sub> [ $\mu\text{g/L}$ ] | Max. PEC <sub>SED</sub> [ $\mu\text{g/kg}$ ] |
|-------------------------------------------|------|------------------------|------------------------|--------------------------------------------|----------------------------------------------|
| Maize<br>(1 x 1440 g a.s./ha, BBCH 00-10) | 1    | 1                      |                        | 392.19                                     | 766.44                                       |
|                                           | 2    | 1                      | North Europe (Mar-May) | 79.67                                      | 155.35                                       |
|                                           |      | 1                      | South Europe (Mar-May) | 148.79                                     | 291.39                                       |

**Overall initial PEC<sub>SW</sub> and PEC<sub>SED</sub> of ESA (CGA354743) (Steps 1-2)**

| Crop                                      | Step | Number of applications | Region (Timing)        | Max. PEC <sub>SW</sub> [ $\mu\text{g/L}$ ] | Max. PEC <sub>SED</sub> [ $\mu\text{g/kg}$ ] |
|-------------------------------------------|------|------------------------|------------------------|--------------------------------------------|----------------------------------------------|
| Maize<br>(1 x 1440 g a.s./ha, BBCH 00-10) | 1    | 1                      |                        | 178.49                                     | 12.48                                        |
|                                           | 2    | 1                      | North Europe (Mar-May) | 35.60                                      | 2.49                                         |
|                                           |      | 1                      | South Europe (Mar-May) | 69.91                                      | 4.89                                         |

**Overall initial PEC<sub>SW</sub> and PEC<sub>SED</sub> of OXA (CGA51202) (Steps 1-2)**

| Crop                                      | Step | Number of applications | Region (Timing)        | Max. PEC <sub>SW</sub> [ $\mu\text{g/L}$ ] | Max. PEC <sub>SED</sub> [ $\mu\text{g/kg}$ ] |
|-------------------------------------------|------|------------------------|------------------------|--------------------------------------------|----------------------------------------------|
| Maize<br>(1 x 1440 g a.s./ha, BBCH 00-10) | 1    | 1                      |                        | 199.44                                     | 23.91                                        |
|                                           | 2    | 1                      | North Europe (Mar-May) | 39.98                                      | 4.79                                         |
|                                           |      | 1                      | South Europe (Mar-May) | 77.22                                      | 9.26                                         |

**Overall initial PEC<sub>SW</sub> and PEC<sub>SED</sub> of CGA40172 (Steps 1-2)**

| Crop                                      | Step | Number of applications | Region (Timing)        | Max. PEC <sub>SW</sub> [ $\mu\text{g/L}$ ] | Max. PEC <sub>SED</sub> [ $\mu\text{g/kg}$ ] |
|-------------------------------------------|------|------------------------|------------------------|--------------------------------------------|----------------------------------------------|
| Maize<br>(1 x 1440 g a.s./ha, BBCH 00-10) | 1    | 1                      |                        | 23.71                                      | 41.26                                        |
|                                           | 2    | 1                      | North Europe (Mar-May) | 4.64                                       | 8.08                                         |
|                                           |      | 1                      | South Europe (Mar-May) | 9.29                                       | 16.16                                        |

**Overall initial PEC<sub>SW</sub> and PEC<sub>SED</sub> of CGA50720 (Steps 1-2)**

| Crop                                      | Step | Number of applications | Region (Timing)        | Max. PEC <sub>SW</sub> [ $\mu\text{g/L}$ ] | Max. PEC <sub>SED</sub> [ $\mu\text{g/kg}$ ] |
|-------------------------------------------|------|------------------------|------------------------|--------------------------------------------|----------------------------------------------|
| Maize<br>(1 x 1440 g a.s./ha, BBCH 00-10) | 1    | 1                      |                        | 28.73                                      | 0.29                                         |
|                                           | 2    | 1                      | North Europe (Mar-May) | 5.73                                       | 0.06                                         |
|                                           |      | 1                      | South Europe (Mar-May) | 11.46                                      | 0.11                                         |

**Overall initial PEC<sub>SW</sub> and PEC<sub>SED</sub> of CGA368208 (Steps 1-2)**

| Crop                                   | Step | Number of applications | Region (Timing)        | Max. PEC <sub>SW</sub> [ $\mu\text{g/L}$ ] | Max. PEC <sub>SED</sub> [ $\mu\text{g/kg}$ ] |
|----------------------------------------|------|------------------------|------------------------|--------------------------------------------|----------------------------------------------|
| Maize (1 x 1440 g a.s./ha, BBCH 00-10) | 1    | 1                      |                        | 33.07                                      | 0.33                                         |
|                                        | 2    | 1                      | North Europe (Mar-May) | 6.60                                       | 0.07                                         |
|                                        |      | 1                      | South Europe (Mar-May) | 13.19                                      | 0.13                                         |

**Overall initial PEC<sub>SW</sub> and PEC<sub>SED</sub> of CGA37735 (Steps 1-2)**

| Crop                                   | Step | Number of applications | Region (Timing)        | Max. PEC <sub>SW</sub> [ $\mu\text{g/L}$ ] | Max. PEC <sub>SED</sub> [ $\mu\text{g/kg}$ ] |
|----------------------------------------|------|------------------------|------------------------|--------------------------------------------|----------------------------------------------|
| Maize (1 x 1440 g a.s./ha, BBCH 00-10) | 1    | 1                      |                        | 22.92                                      | 2.36                                         |
|                                        | 2    | 1                      | North Europe (Mar-May) | 4.57                                       | 0.47                                         |
|                                        |      | 1                      | South Europe (Mar-May) | 9.14                                       | 0.94                                         |

**Overall initial PEC<sub>SW</sub> and PEC<sub>SED</sub> of NOA436611 (Steps 1-2)**

| Crop                                   | Step | Number of applications | Region (Timing)        | Max. PEC <sub>SW</sub> [ $\mu\text{g/L}$ ] | Max. PEC <sub>SED</sub> [ $\mu\text{g/kg}$ ] |
|----------------------------------------|------|------------------------|------------------------|--------------------------------------------|----------------------------------------------|
| Maize (1 x 1440 g a.s./ha, BBCH 00-10) | 1    | 1                      |                        | 54.16                                      | 4.55                                         |
|                                        | 2    | 1                      | North Europe (Mar-May) | 10.8                                       | 0.91                                         |
|                                        |      | 1                      | South Europe (Mar-May) | 21.6                                       | 1.81                                         |

**Overall initial PEC<sub>SW</sub> and PEC<sub>SED</sub> of CGA41507 (Steps 1-2)**

| Crop                                   | Step | Number of applications | Region (Timing)        | Max. PEC <sub>SW</sub> [ $\mu\text{g/L}$ ] | Max. PEC <sub>SED</sub> [ $\mu\text{g/kg}$ ] |
|----------------------------------------|------|------------------------|------------------------|--------------------------------------------|----------------------------------------------|
| Maize (1 x 1440 g a.s./ha, BBCH 00-10) | 1    | 1                      |                        | 70.57                                      | 60.82                                        |
|                                        | 2    | 1                      | North Europe (Mar-May) | 14.43                                      | 12.42                                        |
|                                        |      | 1                      | South Europe (Mar-May) | 26.97                                      | 23.26                                        |

**Overall initial PEC<sub>SW</sub> and PEC<sub>SED</sub> of CGA357704 (Steps 1-2)**

| Crop                                   | Step | Number of applications | Region (Timing)        | Max. PEC <sub>SW</sub> [ $\mu\text{g/L}$ ] | Max. PEC <sub>SED</sub> [ $\mu\text{g/kg}$ ] |
|----------------------------------------|------|------------------------|------------------------|--------------------------------------------|----------------------------------------------|
| Maize (1 x 1440 g a.s./ha, BBCH 00-10) | 1    | 1                      |                        | 103.36                                     | 1.03                                         |
|                                        | 2    | 1                      | North Europe (Mar-May) | 20.26                                      | 0.20                                         |
|                                        |      | 1                      | South Europe (Mar-May) | 40.52                                      | 0.41                                         |

**Estimation of concentrations from other routes of exposure (Regulation (EU) N° 284/2013, Annex Part A, point 9.4)**

Method of calculation

Not relevant

**PEC**

Maximum concentration

-

## Ecotoxicology

### Effects on birds and other terrestrial vertebrates (Regulation (EU) N° 283/2013, Annex Part A, point 8.1 and Regulation (EU) N° 284/2013, Annex Part A, point 10.1)

| Species                    | Test substance                                         | Time scale                     | End point                                                        | Toxicity (mg/kg bw per day)          |
|----------------------------|--------------------------------------------------------|--------------------------------|------------------------------------------------------------------|--------------------------------------|
| <b>Birds</b>               |                                                        |                                |                                                                  |                                      |
| <i>Coturnix japonica</i>   | 'A9396B' (S-metolachlor EC) syn. DualGold (CGH 060-97) | Acute                          | LD <sub>50</sub><br>LD <sub>50</sub> (extrapolated) <sup>1</sup> | ≥2000 mg/kg bw=3776 mg/kg bw         |
| <i>Anas platyrhynchos</i>  | CGA 77102 (S-metolachlor)                              | Acute                          | LD <sub>50</sub><br>LD <sub>50</sub> (extrapolated) <sup>1</sup> | ≥2510 mg/kg bw<br>=4739 mg/kg bw     |
| <i>Colinus virginianus</i> | CGA 77102 (S-metolachlor)                              | Acute                          | LD <sub>50</sub><br>LD <sub>50</sub> (extrapolated) <sup>1</sup> | ≥2510 mg/kg bw<br>=4739 mg/kg bw     |
| <i>Anas platyrhynchos</i>  | CGA 77102 (S-metolachlor)                              | Short-term (8 days)            | LC <sub>50</sub>                                                 | ≥5620 mg/kg diet                     |
| <i>Colinus virginianus</i> | CGA 77102 (S-metolachlor)                              | Short-term (8 days)            | LC <sub>50</sub>                                                 | ≥5620 mg/kg diet                     |
| <i>Anas platyrhynchos</i>  | CGA 24705 (metolachlor)                                | Long-term (17 weeks)           | NOAEL                                                            | =114 mg/kg bw per day                |
| <i>Colinus virginianus</i> | CGA 24705 (metolachlor)                                | Long-term                      | NOAEL                                                            | 87.5 mg/kg bw per day                |
| <i>Colinus virginianus</i> | CGA 77102 (S-metolachlor)                              | Long-term                      | NOAEL                                                            | =87.4 mg/kg bw per day               |
| <b>Mammals</b>             |                                                        |                                |                                                                  |                                      |
| Rat                        | CGA 77102 (S-metolachlor)                              | Acute                          | LD <sub>50</sub>                                                 | ≥2000                                |
| Rat                        | A9396B                                                 | Acute                          | LD <sub>50</sub>                                                 | =2149 (females)<br><br>=3937 (males) |
| Rat                        | CGA 24705 (metolachlor)                                | Long-term (2-generation-study) | Ecological relevant NOAEL                                        | =17.7                                |

Endocrine disrupting properties (Annex Part A, points 8.1.5) The peer review conclusion will be finalised without the ED assessment following the receipt of the mandate in September 2022.

**Mammals**

The assessment of the endocrine disrupting properties for wild mammals could not be finalized due to missing level 5 test in accordance with the latest test protocols. (To investigate further the missing EAS-mediated parameters. This was triggered by some positive findings related to anti-androgenic endocrine activity.)

**Birds**

According to the ECHA/EFSA ED guidance the available number of standardised in vivo methods for birds is limited and only little information can be gained from the existing guidelines concerning potential ED-related effects. The avian reproduction toxicity test (OECD TG 206) gives a list of parameters that might be endocrine-sensitive but which cannot be considered specific for the identification of an endocrine MoA (sensitive to, but not diagnostic of, EATS).

In two studies with *Colinus virginianus* (██████ 1978b and ██████ et al. 1996a) some egg parameters were significantly decreased in the mid-dose. This comes along with a significantly reduced number of total normal hatchlings in the mid dose and marginal effects in the highest dose group.

Additional higher tier studies (Annex Part A, points 10.1.1.2):

- Mammals: three generic field studies
  - ██████ et al. (2013)
  - ████████████████████ (2010)
  - ██████ (2005).
- Mammals: One residue study
  - ██████ (2016)
- Mammals: Bioaccumulation and food chain: two generic field studies
  - ██████ (2017)
  - ██████ & ██████ (2019)

<sup>1</sup> Extrapolation according to EFSA (2009) Chapter 2.1.2. has been applied to the acute endpoint LD<sub>50</sub> since 10 animals were tested and there were no mortalities at the limit dose (extrapolation factor = 1.888).

**Toxicity/exposure ratios for terrestrial vertebrates (Regulation (EU) N° 284/2013, Part A, Annex point 10.1)**

| Growth stage                                                                                                      | Indicator or focal species                    | Time scale | DDD (mg/kg bw per day) | TER | Trigger |
|-------------------------------------------------------------------------------------------------------------------|-----------------------------------------------|------------|------------------------|-----|---------|
| Screening Step (Birds) Group A S-metolachlor (acute risk for Group B-E is covered with the assessment of group A) |                                               |            |                        |     |         |
| Bare soil                                                                                                         | Small granivorous bird                        | Acute      | 35.6                   | 133 | 10      |
| Maize and sunflower                                                                                               | Small omnivorous bird                         | Acute      | 228.7                  | 21  | 10      |
| Tier 1 (Birds) Group A S-metolachlor (long-term risk for Group B is covered with the assessment of group A)       |                                               |            |                        |     |         |
| Maize/bare soil                                                                                                   | Small granivorous bird "finch"                | Long-term  | 8.7                    | 10  | 5       |
|                                                                                                                   | Small omnivorous bird "lark"                  | Long-term  | 6.3                    | 14  | 5       |
|                                                                                                                   | Small insectivorous bird "wagtail"            | Long-term  | 4.5                    | 19  | 5       |
| Maize/BBCH 10-29                                                                                                  | Medium granivorous bird "gamebird"            | Long-term  | 2.3                    | 38  | 5       |
| Maize/BBCH 10-19                                                                                                  | Small insectivorous/vermivorous bird "thrush" | Long-term  | 4.3                    | 20  | 5       |
| Maize/BBCH 10-29                                                                                                  | Small omnivorous bird "lark"                  | Long-term  | 8.3                    | 10  | 5       |



| Growth stage                                                                                                                                                                                                                                                              | Indicator or focal species                                                 | Time scale | DDD (mg/kg bw per day) | TER                      | Trigger |
|---------------------------------------------------------------------------------------------------------------------------------------------------------------------------------------------------------------------------------------------------------------------------|----------------------------------------------------------------------------|------------|------------------------|--------------------------|---------|
| Maize/<br>BBCH 10-29                                                                                                                                                                                                                                                      | Medium herbivorous/granivorous bird "pigeon"                               | Long-term  | 17.2                   | 5.1                      | 5       |
| Maize/<br>BBCH 10-19                                                                                                                                                                                                                                                      | Small insectivorous bird "wagtail"                                         | Long-term  | 8.6                    | 10                       | 5       |
| Sunflower/<br>BBCH 00-19                                                                                                                                                                                                                                                  | Small granivorous bird "lark"                                              | Long-term  | 8.3                    | 11                       | 5       |
|                                                                                                                                                                                                                                                                           | Small insectivorous bird "wagtail"                                         | Long-term  | 8.6                    | 10                       | 5       |
| Screening Step (Mammals) Acute Risk Group A A9396G (Group B is covered with the assessment of group A)                                                                                                                                                                    |                                                                            |            |                        |                          |         |
| Bare soil                                                                                                                                                                                                                                                                 | Small granivorous mammal                                                   | Acute      | 20.7                   | 104                      | 10      |
| Maize and sunflower                                                                                                                                                                                                                                                       | Small herbivorous mammal                                                   | Acute      | 196.4                  | 10.9                     | 10      |
| Screening Step (Mammals) long-term Risk Group A S-metolachlor                                                                                                                                                                                                             |                                                                            |            |                        |                          |         |
| Bare soil                                                                                                                                                                                                                                                                 | Small granivorous mammal                                                   | Long-term  | 5.0                    | <b>3.5</b>               | 5       |
| Maize                                                                                                                                                                                                                                                                     | Small herbivorous mammal                                                   | Long-term  | 36.6                   | <b>0.3</b>               | 5       |
| Screening Step (Mammals) long-term Risk Group B S-metolachlor                                                                                                                                                                                                             |                                                                            |            |                        |                          |         |
| Bare soil                                                                                                                                                                                                                                                                 | Small granivorous mammal                                                   | Long-term  | 5.0                    | <b>4.1</b>               | 5       |
| Maize                                                                                                                                                                                                                                                                     | Small herbivorous mammal                                                   | Long-term  | 36.6                   | <b>0.7</b><br><b>0.4</b> | 5       |
| Tier 1 (Mammals) long-term-risk Group A S-metolachlor                                                                                                                                                                                                                     |                                                                            |            |                        |                          |         |
| Maize/<br>Bare soils                                                                                                                                                                                                                                                      | Small omnivorous mammal "mouse"                                            | Long-term  | 4.4                    | <b>4.1</b>               | 5       |
| Maize/<br>BBCH 10-19                                                                                                                                                                                                                                                      | Small insectivorous mammal "shrew"                                         | Long-term  | 3.2                    | 5.5                      | 5       |
| Maize/<br>BBCH 10-29                                                                                                                                                                                                                                                      | Small herbivorous mammal "vole"                                            | Long-term  | 54.8                   | <b>0.3</b>               | 5       |
| Maize/<br>BBCH 10-29                                                                                                                                                                                                                                                      | Small omnivorous mammal "mouse"                                            | Long-term  | 5.9                    | <b>3</b>                 | 5       |
| Tier 1 (Mammals) long-term-risk Group B S-metolachlor                                                                                                                                                                                                                     |                                                                            |            |                        |                          |         |
| Maize/<br>Bare soils                                                                                                                                                                                                                                                      | Small omnivorous mammal "mouse"                                            | Long-term  | 3.8                    | <b>4.7</b>               | 5       |
| Maize/<br>BBCH 10-19                                                                                                                                                                                                                                                      | Small insectivorous mammal "shrew"                                         | Long-term  | 2.8                    | 6.3                      | 5       |
| Maize/<br>BBCH 10-29                                                                                                                                                                                                                                                      | Small herbivorous mammal "vole"                                            | Long-term  | 47.6                   | <b>0.4</b>               | 5       |
| Maize/<br>BBCH 10-29                                                                                                                                                                                                                                                      | Small omnivorous mammal "mouse"                                            | Long-term  | 5.1                    | <b>3.5</b>               | 5       |
| Higher tier (Mammals): for Group A A9396G (Group B is covered with the assessment of group A)                                                                                                                                                                             |                                                                            |            |                        |                          |         |
| <ul style="list-style-type: none"> <li>- Wood mouse, hare and rabbit as focal species</li> <li>- Worst case PT = 0.139 (for wood mouse)</li> <li>- <math>f_{TWA}</math> for worst case DissT<sub>50</sub> of 0.22 days = 0.015 (used for hare and rabbit only)</li> </ul> |                                                                            |            |                        |                          |         |
| Higher Tier (Mammals) long-term-risk Group A S-metolachlor                                                                                                                                                                                                                |                                                                            |            |                        |                          |         |
| Maize/<br>BBCH 10-29*                                                                                                                                                                                                                                                     | Small omnivorous mammal "mouse": Wood mouse ( <i>Apodemus sylvaticus</i> ) | Long-term  | 0.827                  | 21*                      | 5       |
| Maize/<br>BBCH 10-29                                                                                                                                                                                                                                                      | large herbivorous mammal lagomorph: Hare ( <i>Lepus europaeus</i> )        | Long-term  | 0.391                  | 45.3**                   | 5       |

| Growth stage                                                                                                                                                                                                                                                                                                                                                                                                                                                                                                                                                                                                                                                                                          | Indicator or focal species                                                                             | Time scale                                                                                                                                                                   | DDD (mg/kg bw per day) | TER        | Trigger |
|-------------------------------------------------------------------------------------------------------------------------------------------------------------------------------------------------------------------------------------------------------------------------------------------------------------------------------------------------------------------------------------------------------------------------------------------------------------------------------------------------------------------------------------------------------------------------------------------------------------------------------------------------------------------------------------------------------|--------------------------------------------------------------------------------------------------------|------------------------------------------------------------------------------------------------------------------------------------------------------------------------------|------------------------|------------|---------|
| Maize/<br>BBCH 10-29                                                                                                                                                                                                                                                                                                                                                                                                                                                                                                                                                                                                                                                                                  | large herbivorous mammal<br>lagomorph: Rabbit<br>( <i>Oryctolagus cuniculus</i> )                      | Long-term                                                                                                                                                                    | 0.480                  | 36.9**     | 5       |
| * Value derived for BBCH 10-18 but the uses for BBCH <10 were also at risk for omnivorous mammals. However, in the opinion of the RMS the earlier BBCH stages are covered by the later in this case (cf. RAR).                                                                                                                                                                                                                                                                                                                                                                                                                                                                                        |                                                                                                        |                                                                                                                                                                              |                        |            |         |
| ** At the Pesticide Peer Review Teleconference 29 (EFSA, 2022), it was agreed to accept the worst case foliar dissipation half-time (DT <sub>50</sub> ) from four studies performed in the central zone. Although the experts agreed that the refined DT <sub>50</sub> would also cover the southern zone as the major route of dissipation was volatilisation, it could not be demonstrated that the temperature in the available residue decline studies was sufficiently representative of the temperature in the northern zone. Therefore, the revised DT50 was only used to refine the risk to herbivorous focal species for the post-emergence uses in maize in the central and southern zones. |                                                                                                        |                                                                                                                                                                              |                        |            |         |
| <b>Risk from bioaccumulation and food chain behaviour (S-metolachlor)</b>                                                                                                                                                                                                                                                                                                                                                                                                                                                                                                                                                                                                                             |                                                                                                        |                                                                                                                                                                              |                        |            |         |
|                                                                                                                                                                                                                                                                                                                                                                                                                                                                                                                                                                                                                                                                                                       | Indicator or focal species                                                                             | Time scale                                                                                                                                                                   | DDD (mg/kg bw per day) | TER        | Trigger |
|                                                                                                                                                                                                                                                                                                                                                                                                                                                                                                                                                                                                                                                                                                       | Earthworm-eating birds                                                                                 | Long-term                                                                                                                                                                    | 6.869                  | 12.7       | 5       |
|                                                                                                                                                                                                                                                                                                                                                                                                                                                                                                                                                                                                                                                                                                       | Earthworm-eating mammals                                                                               | Long-term                                                                                                                                                                    | 8.373                  | <b>2.1</b> | 5       |
|                                                                                                                                                                                                                                                                                                                                                                                                                                                                                                                                                                                                                                                                                                       | Fish-eating birds                                                                                      | Long-term                                                                                                                                                                    | 2.033                  | 43         | 5       |
|                                                                                                                                                                                                                                                                                                                                                                                                                                                                                                                                                                                                                                                                                                       | Fish-eating mammals                                                                                    | Long-term                                                                                                                                                                    | 0.733                  | 9.8        | 5       |
| Earthworm-eating mammals (uses in detail)                                                                                                                                                                                                                                                                                                                                                                                                                                                                                                                                                                                                                                                             |                                                                                                        |                                                                                                                                                                              |                        |            |         |
|                                                                                                                                                                                                                                                                                                                                                                                                                                                                                                                                                                                                                                                                                                       | Use group A (0% interception)                                                                          | Long-term                                                                                                                                                                    | 8.373                  | <b>2.1</b> |         |
|                                                                                                                                                                                                                                                                                                                                                                                                                                                                                                                                                                                                                                                                                                       | Use group B (0% interception)                                                                          | Long-term                                                                                                                                                                    | 7.268                  | <b>2.4</b> |         |
| Higher tier: At the Pesticide Peer Review Teleconference 29 (EFSA, 2022), the experts agreed that, overall, there is insufficient information available to define a focal species for the risk assessment for secondary poisoning risk assessment. In the absence of sufficient evidence, the risk for earthworm eating mammals could not be refined for any of the representative uses.                                                                                                                                                                                                                                                                                                              |                                                                                                        |                                                                                                                                                                              |                        |            |         |
| <b>Risk from consumption of contaminated water (S-metolachlor)</b>                                                                                                                                                                                                                                                                                                                                                                                                                                                                                                                                                                                                                                    |                                                                                                        |                                                                                                                                                                              |                        |            |         |
|                                                                                                                                                                                                                                                                                                                                                                                                                                                                                                                                                                                                                                                                                                       | Scenario                                                                                               | Time scale                                                                                                                                                                   | PEC <sub>dw</sub> xDWR | TER        | Trigger |
|                                                                                                                                                                                                                                                                                                                                                                                                                                                                                                                                                                                                                                                                                                       | <b>Leaf scenario</b>                                                                                   | Not relevant                                                                                                                                                                 |                        |            |         |
|                                                                                                                                                                                                                                                                                                                                                                                                                                                                                                                                                                                                                                                                                                       | <b>Puddle scenario, Screening step</b><br>(Group A, Group B is covered with the assessment of group A) | Application rate (1440 g a.s./ha)/relevant endpoint <50 (for koc<500 L/kg, here 200 L/kg),<br>TER calculation not needed for birds (acute and long-term) and mammals (acute) |                        |            |         |
|                                                                                                                                                                                                                                                                                                                                                                                                                                                                                                                                                                                                                                                                                                       | <b>Puddle scenario, Tier 1 Mammals</b><br>(Group A, Group B is covered with the assessment of group A) | Long-term                                                                                                                                                                    | 0.108                  | 164        | 5       |

### Toxicity data for all aquatic tested species (Regulation (EU) N° 283/2013, Annex Part A, points 8.2 and Regulation (EU) N° 284/2013 Annex Part A, point 10.2)\*

\* This section does not yet reflect the new EFSA Guidance Document on aquatic organisms which has been noted in the meeting of the Standing Committee on Plants, Animals, Food and Feed on 11 July 2014.

| Group            | Test substance | Time-scale (Test type) | End point        | Toxicity <sup>1</sup> (mg/L) |
|------------------|----------------|------------------------|------------------|------------------------------|
| Laboratory tests |                |                        |                  |                              |
| Fish             |                |                        |                  |                              |
|                  | S-metolachlor  |                        | LC <sub>50</sub> |                              |

| Group                        | Test substance            | Time-scale<br>(Test type)     | End point                                                                               | Toxicity <sup>1</sup><br>(mg/L)              |
|------------------------------|---------------------------|-------------------------------|-----------------------------------------------------------------------------------------|----------------------------------------------|
| <i>Oncorhynchus mykiss</i>   |                           | Acute 96 hr<br>(static)       |                                                                                         | 12.0 nom                                     |
|                              |                           |                               |                                                                                         |                                              |
|                              |                           |                               |                                                                                         |                                              |
| <i>Cyprinus carpio</i>       |                           |                               |                                                                                         | 20 mm                                        |
| <i>Cyprinodon variegatus</i> |                           |                               |                                                                                         | 17 mm                                        |
| <i>Pimephales promelas</i>   | metolachlor               | Acute 96 hr<br>(flow-through) |                                                                                         | 9.2 mm                                       |
| <i>Cyprinodon variegatus</i> |                           |                               |                                                                                         | 9.8 mm                                       |
| <i>Cyprinodon variegatus</i> |                           |                               |                                                                                         | 7.5                                          |
| <i>Oncorhynchus mykiss</i>   | CGA354743<br>(ESA)        | Acute 96 hr<br>(static)       |                                                                                         | >100 nom                                     |
|                              | CGA51202<br>(OXA)         |                               |                                                                                         | > 100 nom                                    |
|                              | CGA368208                 |                               |                                                                                         | > 100 nom                                    |
|                              | CGA40172                  |                               |                                                                                         | 76.2 nom                                     |
|                              | CGA50720                  |                               |                                                                                         | > 100 nom                                    |
|                              | CGA37735                  |                               |                                                                                         | > 100 nom                                    |
|                              | NOA436611                 |                               |                                                                                         | > 100 nom                                    |
|                              | CGA41507                  |                               |                                                                                         | 54 nom                                       |
|                              | CGA357704                 |                               |                                                                                         | > 100 nom                                    |
|                              | CGA50267                  |                               |                                                                                         | > 100 nom                                    |
|                              | NOA413137                 |                               |                                                                                         | > 100 nom                                    |
| <i>Cyprinus carpio</i>       | CGA51202<br>(OXA)         |                               |                                                                                         | > 100 nom                                    |
|                              | CGA40172                  |                               |                                                                                         | 76.2 nom                                     |
| <i>Oncorhynchus mykiss</i>   | Preparation<br>(A9396G/L) |                               |                                                                                         | 7.65 mg a.s./L nom<br>8.8 mg A9396G/L<br>nom |
|                              | Preparation<br>(A9396C/L) |                               |                                                                                         | 8.6 mg a.s./L mm<br>9.9 mg A9396C/L<br>mm    |
| <i>Cyprinodon variegatus</i> | S-metolachlor             |                               | 34d-NOEC (egg hatchability)<br>34d-NOEC (fry wet/dry weight)<br>34d-NOEC (fry survival) | 1.3 nom                                      |



| Group                        | Test substance | Time-scale<br>(Test type)         | End point                                                                                                                                                                     | Toxicity <sup>1</sup><br>(mg/L)                                |
|------------------------------|----------------|-----------------------------------|-------------------------------------------------------------------------------------------------------------------------------------------------------------------------------|----------------------------------------------------------------|
| <i>Pimephales promelas</i>   |                | Chronic 35 d-ELS (flow-through)   | 35d-NOEC (egg hatchability)<br>35d-NOEC (fry wet/dry weight)<br>35d-NOEC (fry survival)<br><br>35d-EC <sub>10</sub> (fry wet weight)<br>35d-EC <sub>10</sub> (fry dry weight) | ≥0.87 mm<br>0.03 mm<br>≥0.87 mm<br><br>0.26 mm<br>0.22 mm      |
| <i>Oncorhynchus mykiss</i>   |                | Chronic prolonged (flow-through)  | 21d NOEC (length)<br>21d NOEC (weight)<br>21d NOEC (survival)<br>21d NOEC (weight)<br>21d NOEC (survival)<br>21d NOEC (sublethal effects)                                     | 1.73 mm<br>1.73 mm<br>0.89 mm<br>3.0 nom<br>3.0 nom<br>1.9 nom |
| <i>Cyprinodon variegatus</i> | metolachlor    | Chronic 34 d-ELS (flow-through)   | 34d-NOEC (egg hatchability)<br>34d-NOEC (fry wet/dry weight)<br>34d-NOEC (fry survival)                                                                                       | 2.2 mm                                                         |
| <i>Pimephales promelas</i>   |                | Chronic 35 d-ELS (flow-through)   | 35d-NOEC (egg hatchability)<br>35d-NOEC (fry wet/dry weight)<br>35d-NOEC (fry survival)                                                                                       | 1.3 mm                                                         |
|                              |                | Chronic 266 d FFLC (flow-through) | 35d-NOEC (F0 survival)<br>266d-NOEC (F0 weight)<br>35d-NOEC (F1 fry weight)<br>EC <sub>10</sub> (F0 survival day 64)<br>EC <sub>20</sub> (F0 survival day 35)                 | 0.78 mm<br>1.6 mm<br>1.6 mm<br>0.934 mm<br>1.057 mm            |
| <i>Oncorhynchus mykiss</i>   |                | Chronic prolonged flow-through    | 21d-NOEC                                                                                                                                                                      | 0.25 nom                                                       |
| Aquatic invertebrates        |                |                                   |                                                                                                                                                                               |                                                                |
| <i>Daphnia magna</i>         | S-metolachlor  | Acute 48 hr (static)              | Immobility, EC <sub>50</sub>                                                                                                                                                  | 26 mm                                                          |
| <i>Mysidopsis bahia</i>      |                | Acute 96 hr (static)              |                                                                                                                                                                               | 1.4 mm                                                         |
| <i>Crassostrea virginica</i> |                | Acute 96 hr (flow-through)        | Shell growth inhibition                                                                                                                                                       | 4.0 mm                                                         |
| <i>Mysidopsis bahia</i>      | metolachlor    | Acute 96 hr (static)              | Immobility, EC <sub>50</sub>                                                                                                                                                  | 4.9 mm                                                         |
| <i>Crassostrea virginica</i> |                |                                   | Shell growth inhibition                                                                                                                                                       | 1.8 mm                                                         |
| <i>Daphnia magna</i>         | CGA51202 (OXA) | Acute 48 hr (static)              | Immobility, EC <sub>50</sub>                                                                                                                                                  | 14.1 mm                                                        |

| Group                                                                            | Test substance            | Time-scale<br>(Test type)                | End point                                                                      | Toxicity <sup>1</sup><br>(mg/L)                                                          |
|----------------------------------------------------------------------------------|---------------------------|------------------------------------------|--------------------------------------------------------------------------------|------------------------------------------------------------------------------------------|
|                                                                                  | CGA351916                 |                                          |                                                                                | > 100 nom                                                                                |
|                                                                                  | CGA368208                 |                                          |                                                                                | > 100 nom                                                                                |
|                                                                                  | CGA40172                  |                                          |                                                                                | 97.6 nom                                                                                 |
|                                                                                  | CGA50720                  |                                          |                                                                                | > 100 nom                                                                                |
|                                                                                  | CGA37735                  |                                          |                                                                                | > 100 nom                                                                                |
|                                                                                  | NOA436611                 |                                          |                                                                                | > 100 nom                                                                                |
|                                                                                  | CGA41507                  |                                          |                                                                                | 60 nom                                                                                   |
|                                                                                  | CGA357704                 |                                          |                                                                                | > 100 nom                                                                                |
|                                                                                  | CGA50267                  |                                          |                                                                                | 66 nom                                                                                   |
|                                                                                  | NOA413173                 |                                          |                                                                                | > 100 nom                                                                                |
| <i>Daphnia magna</i>                                                             | Preparation<br>(A9396G/L) | Acute 48 hr<br>(static)                  | Immobility, EC <sub>50</sub>                                                   | 24.3 mg as/L nom<br>28 mg<br>A9396G/L nom                                                |
|                                                                                  | Preparation<br>(A9396C/L) |                                          |                                                                                | 18 mg as/L mm<br>20.7 mg<br>A9396C/L mm                                                  |
| <i>Daphnia magna</i>                                                             | S-metolachlor             | Chronic 21 d<br>(flow-through)           | NOEC<br>EC <sub>10</sub><br>EC <sub>20</sub>                                   | 5.2 nom<br>1.29 nom<br>4.2 nom                                                           |
| <i>Mysidopsis bahia</i>                                                          |                           |                                          |                                                                                | NOEC<br>EC <sub>10</sub><br>EC <sub>20</sub>                                             |
| <i>Daphnia magna</i>                                                             | metolachlor               | Chronic 21 d<br>(semi-static)            | NOEC<br>EC <sub>10</sub> reproduction<br>EC <sub>20</sub> reproduction         | 0.6 nom<br>0.56 nom<br>1.21 nom                                                          |
|                                                                                  |                           | Chronic 21 d<br>(flow-through)           | NOEC<br>EC <sub>10</sub> reproduction<br>EC <sub>20</sub> reproduction         | 5.9 mm<br>6.0 mm<br>8.2 mm                                                               |
| <b>Sediment-dwelling organisms</b>                                               |                           |                                          |                                                                                |                                                                                          |
| <i>Chironomus riparius</i>                                                       | S-metolachlor             | Chronic 28 d<br>(static)<br>spiked water | NOEC<br>28-d-EC <sub>10</sub> (emergence)<br>28-d-EC <sub>20</sub> (emergence) | 8.0 nom. 2.38 mm<br>3.6 nom. 5.4 mm<br>6 nom. 5.7 mm<br>12.7 mg/kg mm<br>> 12.7 mg/kg mm |
|                                                                                  |                           | spiked sed.                              | NOEC<br>28-d-EC <sub>10</sub> (emergence)<br>28-d-EC <sub>20</sub> (emergence) | > 12.7 mg/kg<br>mm                                                                       |
| <i>Sediment dwelling organisms : 26 species (Annelids, Arthropods, Molluscs)</i> | metolachlor               | Chronic 62 d<br>(flow-through)           | NOEC <sub>(community)</sub>                                                    | 0.54 mm                                                                                  |

| Group                                  | Test substance     | Time-scale<br>(Test type) | End point                                                                              | Toxicity <sup>1</sup><br>(mg/L)     |
|----------------------------------------|--------------------|---------------------------|----------------------------------------------------------------------------------------|-------------------------------------|
| <i>Chironomus riparius</i>             | CGA41507           | 21 d, static              | NOEC                                                                                   | 1 nom                               |
| Algae                                  |                    |                           |                                                                                        |                                     |
| <i>Pseudokirchneriella subcapitata</i> | S-metolachlor      | 72 h (static)             | E <sub>y</sub> C <sub>50</sub><br>E <sub>r</sub> C <sub>50</sub><br>NOE <sub>r</sub> C | 0.017 mm<br>0.056 mm<br>0.012 mm    |
| <i>Navicula pelliculosa</i>            |                    | 72 h (static)             | E <sub>y</sub> C <sub>50</sub><br>E <sub>r</sub> C <sub>50</sub><br>NOE <sub>r</sub> C | 16 mm<br>31 mm<br>9.7 mm            |
| <i>Navicula pelliculosa</i>            | metolachlor        | 72 h (static)             | E <sub>y</sub> C <sub>50</sub><br>E <sub>r</sub> C <sub>50</sub><br>NOE <sub>y</sub> C | 0.562 mm<br>4.092 mm<br>0.0036 mm   |
| <i>Skeletonema costatum</i>            |                    | 72 h (static)             | E <sub>y</sub> C <sub>50</sub><br>E <sub>r</sub> C <sub>50</sub><br>NOE <sub>y</sub> C | 0.039 mm<br>0.423 mm<br>< 0.0017 mm |
| <i>Desmodesmus subspicatus</i>         | CGA40172           | 72 h (static)             | E <sub>b</sub> C <sub>50</sub>                                                         | 80.5 nom *                          |
|                                        | CGA51202<br>(OXA)  | 72 h (static)             | E <sub>b</sub> C <sub>50</sub>                                                         | 77.6 nom *                          |
| <i>Pseudokirchneriella subcapitata</i> | CGA354743<br>(ESA) | 72 h (static)             | E <sub>y</sub> C <sub>50</sub><br>E <sub>r</sub> C <sub>50</sub>                       | > 100 nom<br>> 100 nom              |
|                                        | CGA41507           | 72 h (static)             | E <sub>b</sub> C <sub>50</sub><br>E <sub>r</sub> C <sub>50</sub>                       | 26 nom *<br>39 nom                  |
|                                        | CGA50720           | 72 h (static)             | E <sub>y</sub> C <sub>50</sub><br>E <sub>r</sub> C <sub>50</sub>                       | > 100 nom<br>> 100 nom              |
|                                        | CGA357704          | 72 h (static)             | E <sub>b</sub> C <sub>50</sub><br>E <sub>r</sub> C <sub>50</sub>                       | 62 nom<br>62 nom                    |
|                                        | CGA368208          | 72 h (static)             | E <sub>y</sub> C <sub>50</sub><br>E <sub>r</sub> C <sub>50</sub>                       | > 100 nom<br>> 100 nom              |
|                                        | CGA351916          | 72 h (static)             | E <sub>y</sub> C <sub>50</sub><br>E <sub>r</sub> C <sub>50</sub>                       | > 100 nom<br>> 100 nom              |
|                                        | CGA37735           | 72 h (static)             | E <sub>b</sub> C <sub>50</sub><br>E <sub>r</sub> C <sub>50</sub>                       | > 100 nom<br>> 100 nom              |
|                                        | NOA436611          | 96 h (static)             | E <sub>y</sub> C <sub>50</sub><br>E <sub>r</sub> C <sub>50</sub>                       | > 100 nom<br>> 100 nom              |
|                                        | SYN542488          | 96 h (static)             | E <sub>y</sub> C <sub>50</sub><br>E <sub>r</sub> C <sub>50</sub>                       | 71 mm<br>> 105 mm                   |
|                                        | SYN542491          | 72 h (static)             | E <sub>y</sub> C <sub>50</sub><br>E <sub>r</sub> C <sub>50</sub>                       | > 105 mm<br>> 105 mm                |

| Group                                  | Test substance                                                                                                                        | Time-scale<br>(Test type) | End point                                                                                                                                                                                                               | Toxicity <sup>1</sup><br>(mg/L)                                                                                                     |
|----------------------------------------|---------------------------------------------------------------------------------------------------------------------------------------|---------------------------|-------------------------------------------------------------------------------------------------------------------------------------------------------------------------------------------------------------------------|-------------------------------------------------------------------------------------------------------------------------------------|
|                                        | SYN542492                                                                                                                             | 72 h (static)             | E <sub>y</sub> C <sub>50</sub><br>E <sub>r</sub> C <sub>50</sub>                                                                                                                                                        | 66 nom<br>66 nom                                                                                                                    |
|                                        | SYN542607                                                                                                                             | 96 h (static)             | E <sub>y</sub> C <sub>50</sub><br>E <sub>r</sub> C <sub>50</sub>                                                                                                                                                        | > 96.8 mm<br>> 96.8 mm                                                                                                              |
|                                        | SYN547977                                                                                                                             | 96 h (static)             | E <sub>y</sub> C <sub>50</sub><br>E <sub>r</sub> C <sub>50</sub>                                                                                                                                                        | 1.5 mm<br>3.4 mm                                                                                                                    |
|                                        | SYN542489                                                                                                                             | 96 h (static)             | E <sub>y</sub> C <sub>50</sub><br>E <sub>r</sub> C <sub>50</sub>                                                                                                                                                        | >89.8 mm<br>>89.8 mm                                                                                                                |
|                                        | CGA50267                                                                                                                              | 72 h (static)             | E <sub>y</sub> C <sub>50</sub><br>E <sub>r</sub> C <sub>50</sub>                                                                                                                                                        | > 100 nom *<br>> 100 nom                                                                                                            |
|                                        | NOA413173                                                                                                                             | 72 h (static)             | E <sub>y</sub> C <sub>50</sub><br>E <sub>r</sub> C <sub>50</sub>                                                                                                                                                        | > 100 nom<br>> 100 nom                                                                                                              |
| <i>Anabaena flos-aquae</i>             | CGA50720                                                                                                                              | 96 h (static)             | E <sub>y</sub> C <sub>50</sub><br>E <sub>r</sub> C <sub>50</sub>                                                                                                                                                        | > 100 nom *<br>> 100 nom                                                                                                            |
| <i>Pseudokirchneriella subcapitata</i> | Preparation<br>(A9396G)                                                                                                               | 72 h (static)             | E <sub>y</sub> C <sub>50</sub>                                                                                                                                                                                          | 0.031 mg A9396G/L mm<br>0.027 mg a.s./L mm                                                                                          |
|                                        |                                                                                                                                       | 96 h (static)             | E <sub>r</sub> C <sub>50</sub>                                                                                                                                                                                          | 0.08 mg<br>A9396G/L mm<br>0.069 mg a.s./L mm                                                                                        |
|                                        |                                                                                                                                       | 72 h (static)             | NOE <sub>r</sub> C                                                                                                                                                                                                      | 0.009 mg<br>A9396G/L mm<br>0.008 mg a.s./L mm                                                                                       |
| <b>Higher plant</b>                    |                                                                                                                                       |                           |                                                                                                                                                                                                                         |                                                                                                                                     |
| <i>Lemna gibba</i>                     | S-metolachlor                                                                                                                         | 7 d (semi-static)         | E <sub>y</sub> C <sub>50</sub> (fronds)<br>E <sub>r</sub> C <sub>50</sub> (fronds)<br>E <sub>y</sub> C <sub>50</sub> (dry weight)<br>E <sub>r</sub> C <sub>50</sub> (dry weight)<br>NOE <sub>r</sub> C (all parameters) | 0.037 mm<br>0.133 mm<br>0.075 mm<br>> 0.619 mm<br>0.0021 mm                                                                         |
|                                        |                                                                                                                                       | 7 d (semi-static)         | E <sub>y</sub> C <sub>50</sub> (fronds)<br>E <sub>r</sub> C <sub>50</sub> (fronds)<br>E <sub>y</sub> C <sub>50</sub> (dry weight)<br>E <sub>r</sub> C <sub>50</sub> (dry weight)<br>NOE <sub>r</sub> C (all parameters) | 0.03 mm<br>0.149 mm<br>0.037 mm<br>0.25 mm<br>0.0038 mm                                                                             |
|                                        |                                                                                                                                       | <i>Elodea canadensis</i>  | 7 d (static)**                                                                                                                                                                                                          | E <sub>y</sub> C <sub>50</sub> (shoot length)<br>E <sub>r</sub> C <sub>50</sub> (shoot length)<br>NOE <sub>r</sub> C (shoot length) |
|                                        | 7-d E <sub>y</sub> C <sub>50</sub> (dry weight)<br>7-d E <sub>r</sub> C <sub>50</sub> (dry weight)<br>NOE <sub>r</sub> C (dry weight) |                           | 0.1 mm<br>0.12 mm<br>0.0089 mm                                                                                                                                                                                          |                                                                                                                                     |
| <i>Lemna gibba</i>                     | CGA51202<br>(OXA)                                                                                                                     | 14 d (static)             | EC <sub>50</sub> (fronds)                                                                                                                                                                                               | > 88.6 mm *                                                                                                                         |
|                                        | CGA354743<br>(ESA)                                                                                                                    | 14 d (static)             | EC <sub>50</sub> (fronds)                                                                                                                                                                                               | 21.7 mm                                                                                                                             |

| Group              | Test substance | Time-scale<br>(Test type) | End point                                   | Toxicity <sup>1</sup><br>(mg/L)                      |
|--------------------|----------------|---------------------------|---------------------------------------------|------------------------------------------------------|
| <i>Lemna gibba</i> | A9396G         | 7 d (semi-static)         | E <sub>y</sub> C <sub>50</sub> (fronds)     | 0.052 mg<br>A9396G/L nom<br>0.045 mg a.s./L<br>nom   |
|                    |                |                           | E <sub>r</sub> C <sub>50</sub> (fronds)     | 0.23 mg<br>A9396G/L nom<br>0.2 mg a.s./L<br>nom      |
|                    |                |                           | NOErC (fronds)                              | 0.0022 mg<br>A9396G/L nom<br>0.0019 mg a.s./L<br>nom |
|                    |                |                           | E <sub>y</sub> C <sub>50</sub> (dry weight) | 0.088 mg<br>A9396G/L nom<br>0.076 mg a.s./L<br>nom   |
|                    |                |                           | E <sub>r</sub> C <sub>50</sub> (dry weight) | > 0.55 mg<br>A9396G/L nom<br>> 0.47 mg a.s./L<br>nom |
|                    |                |                           | NOEC (dry weight)                           | 0.0049 mg<br>A9396G/L nom<br>0.0042 mg a.s./L<br>nom |

Potential endocrine disrupting properties (Annex Part A, point 8.2.3) The peer review conclusion will be finalised without the ED assessment following the receipt of the mandate in September 2022.

The assessment of the endocrine disrupting properties could not be finalized. In order to complete the ED assessment of the EATS modality for non-target organisms according to ECHA/EFSA ED guidance a full detailed study in line with OCED TG 231 (AMA) and a full detailed study in line with OECD GD 148 (Androgenised Female Stickleback Screen) should be submitted.

#### Amphibians

Several studies testing effects of S-Metolachlor (Hayes et al. 2006; Spolyarich et al. 2010; Williams and Semlistch, 2010) on amphibians are available with no direct indication for ED related effects on development and metamorphosis. However, in the study by Hayes et al. 2006 exposure to 0.1 µg/L S-Metolachlor resulted in damage of thymus and a reduced immune reaction.

#### Fish

The studies by Jin et al. 2011 and Quintaneiro et al. 2017 reported an inhibition of thyroid related gene expression caused by Metolachlor and S-Metolachlor. However, it could not be concluded that these alterations result in ED activity and adversity.

#### Other organism

The studies by Mai et al. 2012, 2013, 2016 investigated the effects of S-Metolachlor on *Crassostrea gigas* on embryo-, spermioxicity and oocytotoxicity but no direct ED related effects occurred.

#### Other studies

The study by Ait-Aissia et al. 2010 revealed a moderate anti-androgenic activity in MDAkb2 of S-Metolachlor.

<sup>1</sup> (nom) nominal concentration; (mm) mean measured concentration; prep.: preparation; a.s.: active substance

\*Study not valid for exact EC<sub>x</sub> derivation but suitable to determine the order of magnitude of the EC<sub>x</sub>

\*\*The study did not cover the full life cycle of *E. canadensis* and it was shorter than the duration indicated in the OECD TG 239. Therefore, the study was not considered sufficiently reliable for the hazard characterisation for this species.

**Bioconcentration in fish (Annex Part A, point 8.2.2.3)**

|                                                                                                | Active substance               |
|------------------------------------------------------------------------------------------------|--------------------------------|
| logP <sub>O/W</sub>                                                                            | 3.05 at pH 7                   |
| Steady-state bioconcentration factor (BCF) (total wet weight, normalised to 5 % lipid content) | BCF: 255 whole fish *          |
| Uptake/depuration kinetics BCF                                                                 |                                |
| Annex VI Trigger for the bioconcentration factor                                               | 100                            |
| Clearance time (days) (CT <sub>50</sub> )                                                      |                                |
| (CT <sub>90</sub> )                                                                            | 7.4 d at 0.003 mg/L            |
| Level and nature of residues (%) in organisms after the 14 day depuration phase                | Ca. 91 % depuration after 10 d |

\* based on total <sup>14</sup>C compounds



**Toxicity/exposure ratios for the most sensitive aquatic organisms (Regulation (EU) N° 284/2013, Annex Part A, point 10.2)**

**Aquatic organisms: acceptability of risk (PEC/RAC < 1) for S-metolachlor for each organism group based on FOCUS Steps 1, 2 and 3 calculations for the use of A9396G in maize, 1x1440 g a.s./ha, BBCH 00-09 pre-emergence**

| Group           |                    | Fish acute                          | Fish prolonged             | Inverteb. acute                    | Inverteb. prolonged     | Algae                            | Aquatic macrophytes <sup>(a)</sup> | Sed. dwell. prolonged                              |
|-----------------|--------------------|-------------------------------------|----------------------------|------------------------------------|-------------------------|----------------------------------|------------------------------------|----------------------------------------------------|
| Test species    |                    | <i>4 different species</i>          | <i>Pimephales promelas</i> | <i>Mysidopsis bahia</i>            | <i>Mysidopsis bahia</i> | <i>Pseudokirchn. subcapitata</i> | <i>Elodea canadensis</i>           | <i>26 species (Annelids. Arthropods. Molluscs)</i> |
| Endpoint (µg/L) |                    | EC <sub>50</sub> (geomean)<br>12400 | EC <sub>10</sub><br>220    | EC <sub>50</sub> (geomean)<br>2600 | NOEC<br>153             | ErC <sub>50</sub><br>56          | ErC <sub>50</sub><br>62            | NOEC<br>540                                        |
| AF              |                    | 100                                 | 10                         | 100                                | 10                      | 10                               | 10                                 | 10                                                 |
| RAC (µg/L)      |                    | 124                                 | 22                         | 26                                 | 15.3                    | 5.6                              | 6.2                                | 54                                                 |
| FOCUS Scenario  | PEC glb-max (µg/L) |                                     |                            |                                    |                         |                                  |                                    |                                                    |
| <b>Step 1</b>   |                    |                                     |                            |                                    |                         |                                  |                                    |                                                    |
|                 | 392.19             | <b>3.16</b>                         | <b>17.83</b>               | <b>15.08</b>                       | <b>25.63</b>            | <b>70.03</b>                     | <b>63.26</b>                       | <b>7.26</b>                                        |
| <b>Step 2</b>   |                    |                                     |                            |                                    |                         |                                  |                                    |                                                    |
| N-Europe        | 79.67              | 0.64                                | <b>3.62</b>                | <b>3.06</b>                        | <b>5.21</b>             | <b>14.23</b>                     | <b>12.85</b>                       | <b>1.48</b>                                        |
| S-Europe        | 148.79             | <b>1.20</b>                         | <b>6.76</b>                | <b>5.72</b>                        | <b>9.72</b>             | <b>26.57</b>                     | <b>24.00</b>                       | <b>2.76</b>                                        |
| <b>Step 3</b>   |                    |                                     |                            |                                    |                         |                                  |                                    |                                                    |
| D3/ditch        | 7.55               | 0.06                                | 0.34                       | 0.29                               | 0.49                    | <b>1.35</b>                      | <b>1.22</b>                        | 0.14                                               |
| D4/pond         | 0.974              | 0.01                                | 0.04                       | 0.04                               | 0.06                    | 0.17                             | 0.16                               | 0.02                                               |
| D4/stream       | 6.26               | 0.05                                | 0.28                       | 0.24                               | 0.41                    | <b>1.12</b>                      | <b>1.01</b>                        | 0.12                                               |
| D5/pond         | 0.683              | 0.01                                | 0.03                       | 0.03                               | 0.04                    | 0.12                             | 0.11                               | 0.01                                               |



|           |      |      |             |             |             |             |             |      |
|-----------|------|------|-------------|-------------|-------------|-------------|-------------|------|
| D5/stream | 6.83 | 0.06 | 0.31        | 0.26        | 0.45        | <b>1.22</b> | <b>1.10</b> | 0.13 |
| D6/ditch  | 7.58 | 0.06 | 0.34        | 0.29        | 0.50        | <b>1.35</b> | <b>1.22</b> | 0.14 |
| R1/pond   | 0.77 | 0.01 | 0.04        | 0.03        | 0.05        | 0.14        | 0.12        | 0.01 |
| R1/stream | 19.6 | 0.16 | 0.89        | 0.75        | <b>1.28</b> | <b>3.50</b> | <b>3.16</b> | 0.36 |
| R2/stream | 15.3 | 0.12 | 0.70        | 0.59        | 1.00        | <b>2.73</b> | <b>2.47</b> | 0.28 |
| R3/stream | 48.3 | 0.39 | <b>2.20</b> | <b>1.86</b> | <b>3.16</b> | <b>8.63</b> | <b>7.79</b> | 0.89 |
| R4/stream | 49.1 | 0.40 | <b>2.23</b> | <b>1.89</b> | <b>3.21</b> | <b>8.77</b> | <b>7.92</b> | 0.91 |

(a): The risk assessment for aquatic macrophytes could not be finalised in the absence of a study covering the full life-cycle of the sensitive species *Elodea canadensis* (data gap and issue not finalised).

**Aquatic organisms: acceptability of risk (PEC/RAC < 1) for S-metolachlor for each organism group based on FOCUS Steps 1, 2 and 3 calculations for the use of A9396G in maize, 1x1250 g a.s./ha, BBCH 00-09 pre-emergence**

| Group           |                    | Fish acute                          | Fish prolonged             | Inverteb. acute                    | Inverteb. prolonged     | Algae                                | Aquatic macrophytes <sup>(a)</sup>   | Sed. dwell. prolonged                              |
|-----------------|--------------------|-------------------------------------|----------------------------|------------------------------------|-------------------------|--------------------------------------|--------------------------------------|----------------------------------------------------|
| Test species    |                    | <i>4 different species</i>          | <i>Pimephales promelas</i> | <i>Mysidopsis bahia</i>            | <i>Mysidopsis bahia</i> | <i>Pseudokirchn. subcapitata</i>     | <i>Elodea canadensis</i>             | <i>26 species (Annelids. Arthropods. Molluscs)</i> |
| Endpoint (µg/L) |                    | EC <sub>50</sub> (geomean)<br>12400 | EC <sub>10</sub><br>220    | EC <sub>50</sub> (geomean)<br>2600 | NOEC<br>153             | E <sub>r</sub> C <sub>50</sub><br>56 | E <sub>r</sub> C <sub>50</sub><br>62 | NOEC<br>540                                        |
| AF              |                    | 100                                 | 10                         | 100                                | 10                      | 10                                   | 10                                   | 10                                                 |
| RAC (µg/L)      |                    | 124                                 | 22                         | 26                                 | 15.3                    | 5.6                                  | 6.2                                  | 54                                                 |
| FOCUS Scenario  | PEC glb-max (µg/L) |                                     |                            |                                    |                         |                                      |                                      |                                                    |
| <b>Step 1</b>   |                    |                                     |                            |                                    |                         |                                      |                                      |                                                    |
|                 | 392.19             | <b>3.16</b>                         | <b>17.83</b>               | <b>15.08</b>                       | <b>25.63</b>            | <b>70.03</b>                         | <b>63.26</b>                         | <b>7.26</b>                                        |
| <b>Step 2</b>   |                    |                                     |                            |                                    |                         |                                      |                                      |                                                    |
| N-Europe        | 79.67              | 0.64                                | <b>3.62</b>                | <b>3.06</b>                        | <b>5.21</b>             | <b>14.23</b>                         | <b>12.85</b>                         | <b>1.48</b>                                        |
| S-Europe        | 148.79             | <b>1.20</b>                         | <b>6.76</b>                | <b>5.72</b>                        | <b>9.72</b>             | <b>26.57</b>                         | <b>24.00</b>                         | <b>2.76</b>                                        |





| <b>Step 3</b> |       |      |             |             |             |             |             |      |
|---------------|-------|------|-------------|-------------|-------------|-------------|-------------|------|
| D3/ditch      | 6.55  | 0.05 | 0.30        | 0.25        | 0.43        | <b>1.17</b> | <b>1.06</b> | 0.12 |
| D4/pond       | 0.844 | 0.01 | 0.04        | 0.03        | 0.06        | 0.15        | 0.14        | 0.02 |
| D4/stream     | 5.44  | 0.04 | 0.25        | 0.21        | 0.36        | 0.97        | 0.88        | 0.10 |
| D5/pond       | 0.589 | 0.00 | 0.03        | 0.02        | 0.04        | 0.11        | 0.10        | 0.01 |
| D5/stream     | 5.93  | 0.05 | 0.27        | 0.23        | 0.39        | <b>1.06</b> | 0.96        | 0.11 |
| D6/ditch      | 6.58  | 0.05 | 0.30        | 0.25        | 0.43        | <b>1.18</b> | <b>1.06</b> | 0.12 |
| R1/pond       | 0.673 | 0.01 | 0.03        | 0.03        | 0.04        | 0.12        | 0.11        | 0.01 |
| R1/stream     | 16.9  | 0.14 | 0.77        | 0.65        | <b>1.10</b> | <b>3.02</b> | <b>2.73</b> | 0.31 |
| R2/stream     | 13.2  | 0.11 | 0.60        | 0.51        | 0.86        | <b>2.36</b> | <b>2.13</b> | 0.24 |
| R3/stream     | 41.7  | 0.34 | <b>1.90</b> | <b>1.60</b> | <b>2.73</b> | <b>7.45</b> | <b>6.73</b> | 0.77 |
| R4/stream     | 42.5  | 0.34 | <b>1.93</b> | <b>1.63</b> | <b>2.78</b> | <b>7.59</b> | <b>6.85</b> | 0.79 |

(a): The risk assessment for aquatic macrophytes could not be finalised in the absence of a study covering the full life-cycle of the sensitive species *Elodea canadensis* (data gap and issue not finalised).

**Aquatic organisms: acceptability of risk (PEC/RAC < 1) for S-metolachlor for each organism group based on FOCUS Steps 1, 2 and 3 calculations for the use of A9396G in maize, 1x1440 g a.s./ha, BBCH 11-18 post-emergence**

| Group           |  | Fish acute                          | Fish prolonged             | Inverteb. acute                    | Inverteb. prolonged     | Algae                                | Aquatic macrophytes <sup>(a)</sup>   | Sed. dwell. prolonged                              |
|-----------------|--|-------------------------------------|----------------------------|------------------------------------|-------------------------|--------------------------------------|--------------------------------------|----------------------------------------------------|
| Test species    |  | <i>4 different species</i>          | <i>Pimephales promelas</i> | <i>Mysidopsis bahia</i>            | <i>Mysidopsis bahia</i> | <i>Pseudokirchn. subcapitata</i>     | <i>Elodea canadensis</i>             | <i>26 species (Annelids. Arthropods. Molluscs)</i> |
| Endpoint (µg/L) |  | EC <sub>50</sub> (geomean)<br>12400 | EC <sub>10</sub><br>220    | EC <sub>50</sub> (geomean)<br>2600 | NOEC<br>153             | E <sub>r</sub> C <sub>50</sub><br>56 | E <sub>r</sub> C <sub>50</sub><br>62 | NOEC<br>540                                        |
| AF              |  | 100                                 | 10                         | 100                                | 10                      | 10                                   | 10                                   | 10                                                 |
| RAC (µg/L)      |  | 124                                 | 22                         | 26                                 | 15.3                    | 5.6                                  | 6.2                                  | 54                                                 |

| FOCUS Scenario | PEC glb-max (µg/L) |             |              |              |              |              |              |             |
|----------------|--------------------|-------------|--------------|--------------|--------------|--------------|--------------|-------------|
| <b>Step 1</b>  |                    |             |              |              |              |              |              |             |
|                | 392.19             | <b>3.16</b> | <b>17.83</b> | <b>15.08</b> | <b>25.63</b> | <b>70.03</b> | <b>63.26</b> | <b>7.26</b> |
| <b>Step 2</b>  |                    |             |              |              |              |              |              |             |
| N-Europe       | 79.67              | 0.64        | <b>3.62</b>  | <b>3.06</b>  | <b>5.21</b>  | <b>14.23</b> | <b>12.85</b> | <b>1.48</b> |
| S-Europe       | 148.79             | <b>1.20</b> | <b>6.76</b>  | <b>5.72</b>  | <b>9.72</b>  | <b>26.57</b> | <b>24.00</b> | <b>2.76</b> |
| <b>Step 3</b>  |                    |             |              |              |              |              |              |             |
| D3/ditch       | 7.56               | 0.06        | 0.34         | 0.29         | 0.49         | <b>1.35</b>  | <b>1.22</b>  | 0.14        |
| D4/pond        | 1.27               | 0.01        | 0.06         | 0.05         | 0.08         | 0.23         | 0.20         | 0.02        |
| D4/stream      | 6.5                | 0.05        | 0.30         | 0.25         | 0.42         | <b>1.16</b>  | <b>1.05</b>  | 0.12        |
| D5/pond        | 0.903              | 0.01        | 0.04         | 0.03         | 0.06         | 0.16         | 0.15         | 0.02        |
| D5/stream      | 6.87               | 0.06        | 0.31         | 0.26         | 0.45         | <b>1.23</b>  | <b>1.11</b>  | 0.13        |
| D6/ditch       | 7.59               | 0.06        | 0.35         | 0.29         | 0.50         | <b>1.36</b>  | <b>1.22</b>  | 0.14        |
| R1/pond        | 1.37               | 0.01        | 0.06         | 0.05         | 0.09         | 0.24         | 0.22         | 0.03        |
| R1/stream      | 22.4               | 0.18        | <b>1.02</b>  | 0.86         | <b>1.46</b>  | <b>4.00</b>  | <b>3.61</b>  | 0.41        |
| R2/stream      | 16.2               | 0.13        | 0.74         | 0.62         | <b>1.06</b>  | <b>2.89</b>  | <b>2.61</b>  | 0.30        |
| R3/stream      | 43                 | 0.35        | <b>1.95</b>  | <b>1.65</b>  | <b>2.81</b>  | <b>7.68</b>  | <b>6.94</b>  | 0.80        |
| R4/stream      | 50.8               | 0.41        | <b>2.31</b>  | <b>1.95</b>  | <b>3.32</b>  | <b>9.07</b>  | <b>8.19</b>  | 0.94        |

(a): The risk assessment for aquatic macrophytes could not be finalised in the absence of a study covering the full life-cycle of the sensitive species *Elodea canadensis* (data gap and issue not finalised).

**Aquatic organisms: acceptability of risk (PEC/RAC < 1) for S-metolachlor for each organism group based on FOCUS Steps 1, 2 and 3 calculations for the use of A9396G in maize, 1x1250 g a.s./ha, BBCH 1011-18 post-emergence**

| Group        | Fish acute                 | Fish prolonged             | Inverteb. acute         | Inverteb. prolonged     | Algae                            | Aquatic macrophytes <sup>(a)</sup> | Sed. dwell. prolonged                              |
|--------------|----------------------------|----------------------------|-------------------------|-------------------------|----------------------------------|------------------------------------|----------------------------------------------------|
| Test species | <i>4 different species</i> | <i>Pimephales promelas</i> | <i>Mysidopsis bahia</i> | <i>Mysidopsis bahia</i> | <i>Pseudokirchn. subcapitata</i> | <i>Elodea canadensis</i>           | <i>26 species (Annelids. Arthropods. Molluscs)</i> |

| Endpoint<br>(µg/L)    |                           | EC <sub>50</sub> (geomean) | EC <sub>10</sub> | EC <sub>50</sub> (geomean) | NOEC         | E <sub>r</sub> C <sub>50</sub> | E <sub>r</sub> C <sub>50</sub> | NOEC        |
|-----------------------|---------------------------|----------------------------|------------------|----------------------------|--------------|--------------------------------|--------------------------------|-------------|
|                       |                           | 12400                      | 220              | 2600                       | 153          | 56                             | 62                             | 540         |
| AF                    |                           | 100                        | 10               | 100                        | 10           | 10                             | 10                             | 10          |
| RAC (µg/L)            |                           | 124                        | 22               | 26                         | 15.3         | 5.6                            | 6.2                            | 54          |
| <b>FOCUS Scenario</b> | <b>PEC glb-max (µg/L)</b> |                            |                  |                            |              |                                |                                |             |
| <b>Step 1</b>         |                           |                            |                  |                            |              |                                |                                |             |
|                       | 392.19                    | <b>3.16</b>                | <b>17.83</b>     | <b>15.08</b>               | <b>25.63</b> | <b>70.03</b>                   | <b>63.26</b>                   | <b>7.26</b> |
| <b>Step 2</b>         |                           |                            |                  |                            |              |                                |                                |             |
| N-Europe              | 79.67                     | 0.64                       | <b>3.62</b>      | <b>3.06</b>                | <b>5.21</b>  | <b>14.23</b>                   | <b>12.85</b>                   | <b>1.48</b> |
| S-Europe              | 148.79                    | <b>1.20</b>                | <b>6.76</b>      | <b>5.72</b>                | <b>9.72</b>  | <b>26.57</b>                   | <b>24.00</b>                   | <b>2.76</b> |
| <b>Step 3</b>         |                           |                            |                  |                            |              |                                |                                |             |
| D3/ditch              | 6.56                      | 0.05                       | 0.30             | 0.25                       | 0.43         | <b>1.17</b>                    | <b>1.06</b>                    | 0.12        |
| D4/pond               | 1.1                       | 0.01                       | 0.05             | 0.04                       | 0.07         | 0.20                           | 0.18                           | 0.02        |
| D4/stream             | 5.64                      | 0.05                       | 0.26             | 0.22                       | 0.37         | <b>1.01</b>                    | 0.91                           | 0.10        |
| D5/pond               | 0.781                     | 0.01                       | 0.04             | 0.03                       | 0.05         | 0.14                           | 0.13                           | 0.01        |
| D5/stream             | 5.96                      | 0.05                       | 0.27             | 0.23                       | 0.39         | <b>1.06</b>                    | 0.96                           | 0.11        |
| D6/ditch              | 6.59                      | 0.05                       | 0.30             | 0.25                       | 0.43         | <b>1.18</b>                    | <b>1.06</b>                    | 0.12        |
| R1/pond               | 1.19                      | 0.01                       | 0.05             | 0.05                       | 0.08         | 0.21                           | 0.19                           | 0.02        |
| R1/stream             | 19.4                      | 0.16                       | 0.88             | 0.75                       | <b>1.27</b>  | <b>3.46</b>                    | <b>3.13</b>                    | 0.36        |
| R2/stream             | 14                        | 0.11                       | 0.64             | 0.54                       | 0.92         | <b>2.50</b>                    | <b>2.26</b>                    | 0.26        |
| R3/stream             | 37.2                      | 0.30                       | <b>1.69</b>      | <b>1.43</b>                | <b>2.43</b>  | <b>6.64</b>                    | <b>6.00</b>                    | 0.69        |
| R4/stream             | 43.9                      | 0.35                       | <b>2.00</b>      | <b>1.69</b>                | <b>2.87</b>  | <b>7.84</b>                    | <b>7.08</b>                    | 0.81        |

(a): The risk assessment for aquatic macrophytes could not be finalised in the absence of a study covering the full life-cycle of the sensitive species *Elodea canadensis* (data gap and issue not finalised).

**Aquatic organisms: acceptability of risk (PEC/RAC < 1) for S-metolachlor for each organism group based on FOCUS Steps 1, 2 and 3 calculations for the use of A9396G in sunflower, 1x1440 g a.s./ha, BBCH 00-09 pre-emergence**

| Group           |                    | Fish acute                          | Fish prolonged             | Inverteb. acute                    | Inverteb. prolonged     | Algae                                | Aquatic macrophytes <sup>(a)</sup>   | Sed. dwell. prolonged                              |
|-----------------|--------------------|-------------------------------------|----------------------------|------------------------------------|-------------------------|--------------------------------------|--------------------------------------|----------------------------------------------------|
| Test species    |                    | <i>4 different species</i>          | <i>Pimephales promelas</i> | <i>Mysidopsis bahia</i>            | <i>Mysidopsis bahia</i> | <i>Pseudokirchn. subcapitata</i>     | <i>Elodea canadensis</i>             | <i>26 species (Annelids. Arthropods. Molluscs)</i> |
| Endpoint (µg/L) |                    | EC <sub>50</sub> (geomean)<br>12400 | EC <sub>10</sub><br>220    | EC <sub>50</sub> (geomean)<br>2600 | NOEC<br>153             | E <sub>r</sub> C <sub>50</sub><br>56 | E <sub>r</sub> C <sub>50</sub><br>62 | NOEC<br>540                                        |
| AF              |                    | 100                                 | 10                         | 100                                | 10                      | 10                                   | 10                                   | 10                                                 |
| RAC (µg/L)      |                    | 124                                 | 22                         | 26                                 | 15.3                    | 5.6                                  | 6.2                                  | 54                                                 |
| FOCUS Scenario  | PEC glb-max (µg/L) |                                     |                            |                                    |                         |                                      |                                      |                                                    |
| <b>Step 1</b>   |                    |                                     |                            |                                    |                         |                                      |                                      |                                                    |
|                 | 392.19             | <b>3.16</b>                         | <b>17.83</b>               | <b>15.08</b>                       | <b>25.63</b>            | <b>70.03</b>                         | <b>63.26</b>                         | <b>7.26</b>                                        |
| <b>Step 2</b>   |                    |                                     |                            |                                    |                         |                                      |                                      |                                                    |
| N-Europe        | 79.67              | 0.64                                | <b>3.62</b>                | <b>3.06</b>                        | <b>5.21</b>             | <b>14.23</b>                         | <b>12.85</b>                         | <b>1.48</b>                                        |
| S-Europe        | 148.79             | <b>1.20</b>                         | <b>6.76</b>                | <b>5.72</b>                        | <b>9.72</b>             | <b>26.57</b>                         | <b>24.00</b>                         | <b>2.76</b>                                        |
| <b>Step 3</b>   |                    |                                     |                            |                                    |                         |                                      |                                      |                                                    |
| D5/pond         | 0.609              | 0.00                                | 0.03                       | 0.02                               | 0.04                    | 0.11                                 | 0.10                                 | 0.01                                               |
| D5/stream       | 6.91               | 0.06                                | 0.31                       | 0.27                               | 0.45                    | <b>1.23</b>                          | <b>1.11</b>                          | 0.13                                               |
| R1/pond         | 0.85               | 0.01                                | 0.04                       | 0.03                               | 0.06                    | 0.15                                 | 0.14                                 | 0.02                                               |
| R1/stream       | 17.5               | 0.14                                | 0.80                       | 0.67                               | <b>1.14</b>             | <b>3.13</b>                          | <b>2.82</b>                          | 0.32                                               |
| R3/stream       | 50.4               | 0.41                                | <b>2.29</b>                | <b>1.94</b>                        | <b>3.29</b>             | <b>9.00</b>                          | <b>8.13</b>                          | 0.93                                               |
| R4/stream       | 45.6               | 0.37                                | <b>2.07</b>                | <b>1.75</b>                        | <b>2.98</b>             | <b>8.14</b>                          | <b>7.35</b>                          | 0.84                                               |

(a): The risk assessment for aquatic macrophytes could not be finalised in the absence of a study covering the full life-cycle of the sensitive species *Elodea canadensis* (data gap and issue not finalised).

**Aquatic organisms: acceptability of risk (PEC/RAC < 1) for S-metolachlor for each organism group based on FOCUS Steps 1, 2 and 3 calculations for the use of A9396G in sunflower, 1x1250 g a.s./ha, BBCH 00-09 pre-emergence**

| Group           |                    | Fish acute                          | Fish prolonged             | Inverteb. acute                    | Inverteb. prolonged     | Algae                                | Aquatic macrophytes <sup>(a)</sup>   | Sed. dwell. prolonged                              |
|-----------------|--------------------|-------------------------------------|----------------------------|------------------------------------|-------------------------|--------------------------------------|--------------------------------------|----------------------------------------------------|
| Test species    |                    | <i>4 different species</i>          | <i>Pimephales promelas</i> | <i>Mysidopsis bahia</i>            | <i>Mysidopsis bahia</i> | <i>Pseudokirchn. subcapitata</i>     | <i>Elodea canadensis</i>             | <i>26 species (Annelids. Arthropods. Molluscs)</i> |
| Endpoint (µg/L) |                    | EC <sub>50</sub> (geomean)<br>12400 | EC <sub>10</sub><br>220    | EC <sub>50</sub> (geomean)<br>2600 | NOEC<br>153             | E <sub>r</sub> C <sub>50</sub><br>56 | E <sub>r</sub> C <sub>50</sub><br>62 | NOEC<br>540                                        |
| AF              |                    | 100                                 | 10                         | 100                                | 10                      | 10                                   | 10                                   | 10                                                 |
| RAC (µg/L)      |                    | 124                                 | 22                         | 26                                 | 15.3                    | 5.6                                  | 6.2                                  | 54                                                 |
| FOCUS Scenario  | PEC glb-max (µg/L) |                                     |                            |                                    |                         |                                      |                                      |                                                    |
| <b>Step 1</b>   |                    |                                     |                            |                                    |                         |                                      |                                      |                                                    |
|                 | 392.19             | <b>3.16</b>                         | <b>17.83</b>               | <b>15.08</b>                       | <b>25.63</b>            | <b>70.03</b>                         | <b>63.26</b>                         | <b>7.26</b>                                        |
| <b>Step 2</b>   |                    |                                     |                            |                                    |                         |                                      |                                      |                                                    |
| N-Europe        | 79.67              | 0.64                                | <b>3.62</b>                | <b>3.06</b>                        | <b>5.21</b>             | <b>14.23</b>                         | <b>12.85</b>                         | <b>1.48</b>                                        |
| S-Europe        | 148.79             | <b>1.20</b>                         | <b>6.76</b>                | <b>5.72</b>                        | <b>9.72</b>             | <b>26.57</b>                         | <b>24.00</b>                         | <b>2.76</b>                                        |
| <b>Step 3</b>   |                    |                                     |                            |                                    |                         |                                      |                                      |                                                    |
| D5/pond         | 0.526              | 0.00                                | 0.02                       | 0.02                               | 0.03                    | 0.09                                 | 0.08                                 | 0.01                                               |
| D5/stream       | 5.99               | 0.05                                | 0.27                       | 0.23                               | 0.39                    | <b>1.07</b>                          | 0.97                                 | 0.11                                               |
| R1/pond         | 0.743              | 0.01                                | 0.03                       | 0.03                               | 0.05                    | 0.13                                 | 0.12                                 | 0.01                                               |
| R1/stream       | 15.1               | 0.12                                | 0.69                       | 0.58                               | 0.99                    | <b>2.70</b>                          | <b>2.44</b>                          | 0.28                                               |
| R3/stream       | 43.4               | 0.35                                | <b>1.97</b>                | <b>1.67</b>                        | <b>2.84</b>             | <b>7.75</b>                          | <b>7.00</b>                          | 0.80                                               |
| R4/stream       | 39.4               | 0.32                                | <b>1.79</b>                | <b>1.52</b>                        | <b>2.58</b>             | <b>7.04</b>                          | <b>6.35</b>                          | 0.73                                               |

(a): The risk assessment for aquatic macrophytes could not be finalised in the absence of a study covering the full life-cycle of the sensitive species *Elodea canadensis* (data gap and issue not finalised).

**Aquatic organisms: acceptability of risk (PEC/RAC < 1) for S-metolachlor for each organism group based on FOCUS Step 4 calculations for the use of A9396G in maize, 1x1440 g a.s./ha, BBCH 00-09 pre-emergence**

| Group           |                                                                   | Algae                                |                                                                   | Algae                                |
|-----------------|-------------------------------------------------------------------|--------------------------------------|-------------------------------------------------------------------|--------------------------------------|
| Test species    |                                                                   | <i>Pseudokirchn. subcapitata</i>     |                                                                   | <i>Pseudokirchn. subcapitata</i>     |
| Endpoint (µg/L) |                                                                   | E <sub>r</sub> C <sub>50</sub><br>56 |                                                                   | E <sub>r</sub> C <sub>50</sub><br>56 |
| AF              |                                                                   | 10                                   |                                                                   | 10                                   |
| RAC (µg/L)      |                                                                   | 5.6                                  |                                                                   | 5.6                                  |
| FOCUS Scenario  | <b>PEC glb-max (µg/L)<br/>10 m buffer; 60% run off mitigation</b> |                                      | <b>PEC glb-max (µg/L)<br/>20 m buffer; 80% run off mitigation</b> |                                      |
| Step 4          |                                                                   |                                      |                                                                   |                                      |
| D3/ditch        | 1.31                                                              | 0.23                                 | 0.682                                                             | 0.12                                 |
| D4/pond         | 0.959                                                             | 0.17                                 | 0.949                                                             | 0.17                                 |
| D4/stream       | 1.44                                                              | 0.26                                 | 1.1                                                               | 0.20                                 |
| D5/pond         | 0.603                                                             | 0.11                                 | 0.593                                                             | 0.11                                 |
| D5/stream       | 1.62                                                              | 0.29                                 | 0.89                                                              | 0.16                                 |
| D6/ditch        | 1.35                                                              | 0.24                                 | 0.714                                                             | 0.13                                 |
| R1/pond         | 0.373                                                             | 0.07                                 | 0.211                                                             | 0.04                                 |
| R1/stream       | 8.29                                                              | <b>1.48</b>                          | 4.23                                                              | 0.76                                 |
| R2/stream       | 6.83                                                              | <b>1.22</b>                          | 3.56                                                              | 0.64                                 |
| R3/stream       | 22                                                                | <b>3.93</b>                          | 11.6                                                              | <b>2.07</b>                          |
| R4/stream       | 22.3                                                              | <b>3.98</b>                          | 11.7                                                              | <b>2.09</b>                          |

**Aquatic organisms: acceptability of risk (PEC/RAC < 1) for S-metolachlor for each organism group based on FOCUS Step 4 calculations for the use of A9396G in maize, 1x1250 g a.s./ha, BBCH 00-10 pre-emergence**

| Group           |                                                                   | Algae                                |                                                                   | Algae                                |
|-----------------|-------------------------------------------------------------------|--------------------------------------|-------------------------------------------------------------------|--------------------------------------|
| Test species    |                                                                   | <i>Pseudokirchn. subcapitata</i>     |                                                                   | <i>Pseudokirchn. subcapitata</i>     |
| Endpoint (µg/L) |                                                                   | E <sub>r</sub> C <sub>50</sub><br>56 |                                                                   | E <sub>r</sub> C <sub>50</sub><br>56 |
| AF              |                                                                   | 10                                   |                                                                   | 10                                   |
| RAC (µg/L)      |                                                                   | 5.6                                  |                                                                   | 5.6                                  |
| FOCUS Scenario  | <b>PEC glb-max (µg/L)<br/>10 m buffer; 60% run off mitigation</b> |                                      | <b>PEC glb-max (µg/L)<br/>20 m buffer; 80% run off mitigation</b> |                                      |
| Step 4          |                                                                   |                                      |                                                                   |                                      |
| D3/ditch        | 1.14                                                              | 0.20                                 | 0.592                                                             | 0.11                                 |
| D4/pond         | 0.832                                                             | 0.15                                 | 0.823                                                             | 0.15                                 |
| D4/stream       | 1.25                                                              | 0.22                                 | 0.954                                                             | 0.17                                 |
| D5/pond         | 0.522                                                             | 0.09                                 | 0.513                                                             | 0.09                                 |
| D5/stream       | 1.41                                                              | 0.25                                 | 0.772                                                             | 0.14                                 |
| D6/ditch        | 1.17                                                              | 0.21                                 | 0.619                                                             | 0.11                                 |
| R1/pond         | 0.326                                                             | 0.06                                 | 0.184                                                             | 0.03                                 |
| R1/stream       | 7.17                                                              | <b>1.28</b>                          | 3.66                                                              | 0.65                                 |
| R2/stream       | 5.89                                                              | <b>1.05</b>                          | 3.07                                                              | 0.55                                 |
| R3/stream       | 19                                                                | <b>3.39</b>                          | 9.99                                                              | <b>1.78</b>                          |
| R4/stream       | 19.3                                                              | <b>3.45</b>                          | 10.1                                                              | <b>1.80</b>                          |



**Aquatic organisms: acceptability of risk (PEC/RAC < 1) for S-metolachlor for each organism group based on FOCUS Step 4 calculations for the use of A9396G in maize, 1x1440 g a.s./ha, BBCH 11-18 post-emergence**

| Group           |                                                                   | Algae                                |                                                                   | Algae                                |
|-----------------|-------------------------------------------------------------------|--------------------------------------|-------------------------------------------------------------------|--------------------------------------|
| Test species    |                                                                   | <i>Pseudokirchn. subcapitata</i>     |                                                                   | <i>Pseudokirchn. subcapitata</i>     |
| Endpoint (µg/L) |                                                                   | E <sub>r</sub> C <sub>50</sub><br>56 |                                                                   | E <sub>r</sub> C <sub>50</sub><br>56 |
| AF              |                                                                   | 10                                   |                                                                   | 10                                   |
| RAC (µg/L)      |                                                                   | 5.6                                  |                                                                   | 5.6                                  |
| FOCUS Scenario  | <b>PEC glb-max (µg/L)<br/>10 m buffer; 60% run off mitigation</b> |                                      | <b>PEC glb-max (µg/L)<br/>20 m buffer; 80% run off mitigation</b> |                                      |
| Step 4          |                                                                   |                                      |                                                                   |                                      |
| D3/ditch        | 1.31                                                              | 0.23                                 | 0.682                                                             | 0.12                                 |
| D4/pond         | 1.25                                                              | 0.22                                 | 1.24                                                              | 0.22                                 |
| D4/stream       | 1.49                                                              | 0.27                                 | 1.47                                                              | 0.26                                 |
| D5/pond         | 0.887                                                             | 0.16                                 | 0.875                                                             | 0.16                                 |
| D5/stream       | 1.64                                                              | 0.29                                 | 0.911                                                             | 0.16                                 |
| D6/ditch        | 1.35                                                              | 0.24                                 | 0.719                                                             | 0.13                                 |
| R1/pond         | 0.621                                                             | 0.11                                 | 0.338                                                             | 0.06                                 |
| R1/stream       | 10.1                                                              | <b>1.80</b>                          | 5.29                                                              | 0.94                                 |
| R2/stream       | 7.15                                                              | <b>1.28</b>                          | 3.7                                                               | 0.66                                 |
| R3/stream       | 19.4                                                              | <b>3.46</b>                          | 10.2                                                              | <b>1.82</b>                          |
| R4/stream       | 23.1                                                              | <b>4.13</b>                          | 12.1                                                              | <b>2.16</b>                          |





**Aquatic organisms: acceptability of risk (PEC/RAC < 1) for S-metolachlor for each organism group based on FOCUS Step 4 calculations for the use of A9396G in maize, 1x1250 g a.s./ha, BBCH 11-18 post-emergence**

| Group           |                                                                   | Algae                                |                                                                   | Algae                                |
|-----------------|-------------------------------------------------------------------|--------------------------------------|-------------------------------------------------------------------|--------------------------------------|
| Test species    |                                                                   | <i>Pseudokirchn. subcapitata</i>     |                                                                   | <i>Pseudokirchn. subcapitata</i>     |
| Endpoint (µg/L) |                                                                   | E <sub>r</sub> C <sub>50</sub><br>56 |                                                                   | E <sub>r</sub> C <sub>50</sub><br>56 |
| AF              |                                                                   | 10                                   |                                                                   | 10                                   |
| RAC (µg/L)      |                                                                   | 5.6                                  |                                                                   | 5.6                                  |
| FOCUS Scenario  | <b>PEC glb-max (µg/L)<br/>10 m buffer; 60% run off mitigation</b> |                                      | <b>PEC glb-max (µg/L)<br/>20 m buffer; 80% run off mitigation</b> |                                      |
| Step 4          |                                                                   |                                      |                                                                   |                                      |
| D3/ditch        | 1.14                                                              | 0.20                                 | 0.593                                                             | 0.11                                 |
| D4/pond         | 1.09                                                              | 0.19                                 | 1.08                                                              | 0.19                                 |
| D4/stream       | 1.3                                                               | 0.23                                 | 1.27                                                              | 0.23                                 |
| D5/pond         | 0.767                                                             | 0.14                                 | 0.756                                                             | 0.14                                 |
| D5/stream       | 1.43                                                              | 0.26                                 | 0.79                                                              | 0.14                                 |
| D6/ditch        | 1.17                                                              | 0.21                                 | 0.624                                                             | 0.11                                 |
| R1/pond         | 0.542                                                             | 0.10                                 | 0.295                                                             | 0.05                                 |
| R1/stream       | 8.78                                                              | <b>1.57</b>                          | 4.59                                                              | 0.82                                 |
| R2/stream       | 6.16                                                              | <b>1.10</b>                          | 3.19                                                              | 0.57                                 |
| R3/stream       | 16.8                                                              | <b>3.00</b>                          | 8.78                                                              | <b>1.57</b>                          |
| R4/stream       | 20                                                                | <b>3.57</b>                          | 10.5                                                              | <b>1.88</b>                          |



**Aquatic organisms: acceptability of risk (PEC/RAC < 1) for S-metolachlor for each organism group based on FOCUS Step 4 calculations for the use of A9396G in sunflower, 1x1440 g a.s./ha, BBCH 00-09 pre-emergence**

| Group           |                                                           |  | Algae                                                     |  |       | Algae                                |
|-----------------|-----------------------------------------------------------|--|-----------------------------------------------------------|--|-------|--------------------------------------|
| Test species    |                                                           |  | <i>Pseudokirchn. subcapitata</i>                          |  |       | <i>Pseudokirchn. subcapitata</i>     |
| Endpoint (µg/L) |                                                           |  | E <sub>r</sub> C <sub>50</sub><br>56                      |  |       | E <sub>r</sub> C <sub>50</sub><br>56 |
| AF              |                                                           |  | 10                                                        |  |       | 10                                   |
| RAC (µg/L)      |                                                           |  | 5.6                                                       |  |       | 5.6                                  |
| FOCUS Scenario  | PEC glb-max (µg/L)<br>10 m buffer; 60% run off mitigation |  | PEC glb-max (µg/L)<br>20 m buffer; 80% run off mitigation |  |       |                                      |
| Step 4          |                                                           |  |                                                           |  |       |                                      |
| D5/pond         | 0.508                                                     |  | 0.09                                                      |  | 0.487 | 0.09                                 |
| D5/stream       | 1.62                                                      |  | 0.29                                                      |  | 0.879 | 0.16                                 |
| R1/pond         | 0.405                                                     |  | 0.07                                                      |  | 0.227 | 0.04                                 |
| R1/stream       | 7.37                                                      |  | <b>1.32</b>                                               |  | 3.75  | 0.67                                 |
| R3/stream       | 21.5                                                      |  | <b>3.84</b>                                               |  | 11    | <b>1.96</b>                          |
| R4/stream       | 20.7                                                      |  | <b>3.70</b>                                               |  | 10.9  | <b>1.95</b>                          |

**Aquatic organisms: acceptability of risk (PEC/RAC < 1) for S-metolachlor for each organism group based on FOCUS Step 4 calculations for the use of A9396G in sunflower, 1x1250 g a.s./ha, BBCH 00-09 pre-emergence**

| Group        |  |  | Algae                            |  |  | Algae                            |
|--------------|--|--|----------------------------------|--|--|----------------------------------|
| Test species |  |  | <i>Pseudokirchn. subcapitata</i> |  |  | <i>Pseudokirchn. subcapitata</i> |

| Endpoint<br>(µg/L) |                                                           | E <sub>r</sub> C <sub>50</sub><br>56 |                                                           | E <sub>r</sub> C <sub>50</sub><br>56 |
|--------------------|-----------------------------------------------------------|--------------------------------------|-----------------------------------------------------------|--------------------------------------|
| AF                 |                                                           | 10                                   |                                                           | 10                                   |
| RAC (µg/L)         |                                                           | 5.6                                  |                                                           | 5.6                                  |
| FOCUS Scenario     | PEC glb-max (µg/L)<br>10 m buffer; 60% run off mitigation |                                      | PEC glb-max (µg/L)<br>20 m buffer; 80% run off mitigation |                                      |
| <b>Step 4</b>      |                                                           |                                      |                                                           |                                      |
| D5/pond            | 0.439                                                     | 0.08                                 | 0.421                                                     | 0.08                                 |
| D5/stream          | 1.41                                                      | 0.25                                 | 0.763                                                     | 0.14                                 |
| R1/pond            | 0.355                                                     | 0.06                                 | 0.199                                                     | 0.04                                 |
| R1/stream          | 6.37                                                      | <b>1.14</b>                          | 3.24                                                      | 0.58                                 |
| R3/stream          | 18.6                                                      | <b>3.32</b>                          | 9.48                                                      | <b>1.69</b>                          |
| R4/stream          | 17.9                                                      | <b>3.20</b>                          | 9.39                                                      | <b>1.68</b>                          |



**Effects on bees (Regulation (EU) N° 283/2013, Annex Part A, point 8.3.1 and Regulation (EU) N° 284/2013 Annex Part A, point 10.3.1)\***

\* This section does not reflect the new EFSA Guidance Document on bees which has not yet been noted by the Standing Committee on Plants, Animals, Food and Feed, and which is currently under revision.

| Species                  | Test substance                  | Time scale/type of endpoint | End point                                 | Toxicity                                                                      |
|--------------------------|---------------------------------|-----------------------------|-------------------------------------------|-------------------------------------------------------------------------------|
| <i>Apis mellifera</i> L. | S-metolachlor tech. (CGA 77102) | acute                       | oral toxicity 72 h (LD <sub>50</sub> )    | >85 µg a.s./bee                                                               |
|                          |                                 |                             | contact toxicity 72 h (LD <sub>50</sub> ) | >200 µg a.s./bee                                                              |
|                          | A9396G *                        | acute                       | oral toxicity 48 h (LD <sub>50</sub> )    | 239 µg product/bee                                                            |
|                          |                                 |                             | contact toxicity 48 h (LD <sub>50</sub> ) | >1000 µg product/bee                                                          |
|                          | A9396G *                        | chronic                     | 10 d chronic oral LDD <sub>50</sub>       | 150 µg product/bee/day                                                        |
|                          |                                 |                             | 10 d chronic oral LC <sub>50</sub>        | 7247 mg product/kg                                                            |
|                          |                                 |                             | NOEC                                      | 3600 mg product/kg                                                            |
|                          |                                 |                             | LOEC                                      | 7200 mg product/kg                                                            |
|                          | A9396G *                        | Bee brood development       | 8 d chronic oral LD <sub>50</sub>         | 191.9 µg a.s./larva                                                           |
|                          |                                 |                             | NOEC <sub>larvae</sub>                    | 290.9 mg a.s./kg diet (equivalent to a cumulative dose of 44.8 µg a.s./larva) |
|                          | S-metolachlor tech.             | Bee brood development       | 22 d chronic oral NOEC <sub>larvae</sub>  | 390 µg a.s./kg diet (equivalent to a cumulative dose of 60.1 µg a.s./larva)   |

\* A9396G: 960 g s-metolachlor/L; density: 1.11 g/cm<sup>3</sup>

Potential for accumulative toxicity: no data

Semi-field test (cage and tunnel test): no data

Field tests: no data

**Risk assessment according to SANCO guidance on terrestrial ecotoxicology (European Commission, 2002)**

The recommended use pattern for A9396 (960 g s-metolachlor/L) includes application in maize (1.5 L a.s./ha) and sunflowers (1.3 L a.s./ha) at a maximum application rate of up to 1665 g product/ha (1440 g a.s./ha).

| Species                  | Crop       | Test substance      | Risk quotient | HQ    | Trigger |
|--------------------------|------------|---------------------|---------------|-------|---------|
| <i>Apis mellifera</i> L. | maize      | s-metolachlor tech. | HQ oral       | <16.9 | 50      |
|                          |            |                     | HQ contact    | <7.2  |         |
|                          | sunflowers |                     | HQ oral       | <14.6 |         |
|                          |            |                     | HQ contact    | <6.24 |         |
|                          | maize      | A9396G *            | HQ oral       | 7.0   |         |
|                          |            |                     | HQ contact    | <1.7  |         |
|                          | sunflowers |                     | HQ oral       | 6.0   |         |
|                          |            |                     | HQ contact    | <1.4  |         |

\* A9396G: 960 g s-metolachlor/L; density: 1.11 g/cm<sup>3</sup>

## Risk assessment for honeybees according to EFSA (2013)

### Screening step - Acute and Chronic Risk Assessment

Acute, chronic adult and larval honey bee studies have been conducted with S-metolachlor and A9396G according to the data requirements under 1107/2009. The endpoints from these studies have been assessed by using EFSA Bee Guidance (2014) and EFSA Bee Tool Screening step and the results are shown in Tables B.9.5.1.7-3 to B.9.5.1.7-9 for maize and sunflower.

### Screening step assessment of the risk for bees due to the use of A9396G in maize and sunflower

| Intended use                                  | DW                                    |                         |                |              |         |
|-----------------------------------------------|---------------------------------------|-------------------------|----------------|--------------|---------|
| Active substance                              | S-metolachlor                         |                         |                |              |         |
| Test design                                   | Endpoint (lab.)<br>(µg a.s./bee)      | Single application rate | Shortcut Value | HQ/ ETR      | Trigger |
| Acute contact toxicity LD <sub>50</sub>       | 85                                    | 1440 g a.s./ha          | 1              | 16.9         | 42      |
|                                               |                                       | 1250 g a.s./ha          | 1              | 14.7         | 42      |
| Acute oral toxicity LD <sub>50</sub>          | 200                                   | 1.44 Kg a.s./ha         | 10.6           | 0.05         | 0.2     |
|                                               |                                       | 1.25 Kg a.s./ha         | 10.6           | 0.05         | 0.2     |
| Chronic adult oral toxicity LDD <sub>50</sub> | 129 µg a.s./bee/day                   | 1.44 Kg a.s./ha         | 10.6           | <b>0.085</b> | 0.03    |
|                                               |                                       | 1.25 Kg a.s./ha         | 10.6           | <b>0.074</b> | 0.03    |
| Larval development oral toxicity NOED         | 44.8 µg a.s./larva/development period | 1.44 Kg a.s./ha         | 6.1            | 0.14         | 0.2     |
|                                               |                                       | 1.25 Kg a.s./ha         | 6.1            | 0.12         | 0.2     |
| Larval development oral toxicity 22-day NOED  | 60.1 µg a.s./larva/development period | 1.44 Kg a.s./ha         | 6.1            | 0.11         | 0.2     |
|                                               |                                       | 1.25 Kg a.s./ha         | 6.1            | 0.09         | 0.2     |

HQ (hazard quotients) and ETR (exposure toxicity ratio) for oral and contact exposure. HQ/ETR values shown in bold breach the relevant trigger.

**The screening step indicated acceptable risk from acute contact and oral exposure to adult honey bees and acceptable risk to chronic oral risk to honey bee larvae, following applications of S-metolachlor according to the proposed use pattern.**

However a potential chronic oral risk to honey bee adults was demonstrated. Therefore, a Tier 1 chronic adult assessment for the treated crop is provided below.

### Tier 1 - Chronic Adult Oral Risk Assessment

The screening step risk assessment indicated a potential chronic risk to adult bees, therefore a Tier 1 assessment has been provided below for maize and sunflower below.

Applications to maize and sunflower are made pre-flowering, therefore an off-field assessment (adjacent

crop and field margin) is shown below together with a flowering weeds and treated crop assessment (worst case).

**First-tier assessment of the chronic risk for bees due to the use of A9396G in maize for the treated crop (BBCH 00-18)**

| Intended use<br>Active substance              |                     | DW<br>S-metolachlor                  |                               |      |          |         |         |
|-----------------------------------------------|---------------------|--------------------------------------|-------------------------------|------|----------|---------|---------|
| Test design                                   | Endpoint (lab.)     | Single Application rate (kg a.s./ha) | Shortcut Value (upward spray) | TWA  | fDep/ Ef | HQ/ ETR | Trigger |
| Chronic adult oral toxicity LDD <sub>50</sub> | 129 µg a.s./bee/day | 1.44                                 | 0.92                          | 0.72 | 1        | 0.007   | 0.03    |
|                                               |                     | 1.25                                 | 0.92                          | 0.72 | 1        | 0.006   | 0.03    |

HQ (hazard quotients) and ETR (exposure toxicity ratio) for oral and contact exposure.

**First-tier assessment of the chronic risk for bees due to the use of A9396G in maize for the flowering weeds (BBCH 00-18)**

| Intended use<br>Active substance              |                     | DW<br>S-metolachlor                  |                               |      |          |         |         |
|-----------------------------------------------|---------------------|--------------------------------------|-------------------------------|------|----------|---------|---------|
| Test design                                   | Endpoint (lab.)     | Single Application rate (kg a.s./ha) | Shortcut Value (upward spray) | TWA  | fDep/ Ef | HQ/ ETR | Trigger |
| Chronic adult oral toxicity LDD <sub>50</sub> | 129 µg a.s./bee/day | 1.44                                 | 2.9                           | 0.72 | 1        | 0.023   | 0.03    |
|                                               |                     | 1.25                                 | 2.9                           | 0.72 | 1        | 0.020   | 0.03    |

HQ (hazard quotients) and ETR (exposure toxicity ratio) for oral and contact exposure.

**First-tier assessment of the chronic risk for bees due to the use of A9396G in maize for the adjacent crop (BBCH 00-18)**

| Intended use<br>Active substance              |                     | DW<br>S-metolachlor                  |                               |      |          |         |         |
|-----------------------------------------------|---------------------|--------------------------------------|-------------------------------|------|----------|---------|---------|
| Test design                                   | Endpoint (lab.)     | Single application rate (kg a.s./ha) | Shortcut Value (upward spray) | TWA  | fDep/ Ef | HQ/ ETR | Trigger |
| Chronic adult oral toxicity LDD <sub>50</sub> | 129 µg a.s./bee/day | 1.44                                 | 5.8                           | 0.72 | 0.0033   | 0.000   | 0.03    |
|                                               |                     | 1.25                                 | 5.8                           | 0.72 | 0.0033   | 0.000   | 0.03    |

HQ (hazard quotients) and ETR (exposure toxicity ratio) for oral and contact exposure.

**First-tier assessment of the chronic risk for bees due to the use of A9396G in maize for field margin (BBCH 00-18)**

| Intended use<br>Active substance |                 | DW<br>S-metolachlor                  |                               |     |          |         |         |
|----------------------------------|-----------------|--------------------------------------|-------------------------------|-----|----------|---------|---------|
| Test design                      | Endpoint (lab.) | Single Application rate (kg a.s./ha) | Shortcut Value (upward spray) | TWA | fDep/ Ef | HQ/ ETR | Trigger |

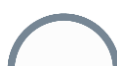

|                                               |                     |      |     |      |        |       |      |
|-----------------------------------------------|---------------------|------|-----|------|--------|-------|------|
| Chronic adult oral toxicity LDD <sub>50</sub> | 129 µg a.s./bee/day | 1.44 | 2.9 | 0.72 | 0.0092 | 0.000 | 0.03 |
|                                               |                     | 1.25 | 2.9 | 0.72 | 0.0092 | 0.000 | 0.03 |

HQ (hazard quotients) and ETR (exposure toxicity ratio) for oral and contact exposure.

**First-tier assessment of the chronic risk for bees due to the use of A9396G in sunflower for the treated crop (BBCH <10)**

| Intended use<br>Active substance              |                     | DW<br>S-metolachlor                  |                               |      |          |         |         |
|-----------------------------------------------|---------------------|--------------------------------------|-------------------------------|------|----------|---------|---------|
| Test design                                   | Endpoint (lab.)     | Single application rate (kg a.s./ha) | Shortcut Value (upward spray) | TWA  | fDep/ Ef | HQ/ ETR | Trigger |
| Chronic adult oral toxicity LDD <sub>50</sub> | 129 µg a.s./bee/day | 1.44                                 | 0.54                          | 0.72 | 1        | 0.004   | 0.03    |
|                                               |                     | 1.25                                 | 0.54                          | 0.72 | 1        | 0.004   | 0.03    |

HQ (hazard quotients) and ETR (exposure toxicity ratio) for oral and contact exposure.

**First-tier assessment of the chronic risk for bees due to the use of A9396G in sunflower for the flowering weeds (BBCH <10)**

| Intended use<br>Active substance              |                     | DW<br>S-metolachlor                  |                               |      |          |         |         |
|-----------------------------------------------|---------------------|--------------------------------------|-------------------------------|------|----------|---------|---------|
| Test design                                   | Endpoint (lab.)     | Single application rate (kg a.s./ha) | Shortcut Value (upward spray) | TWA  | fDep/ Ef | HQ/ ETR | Trigger |
| Chronic adult oral toxicity LDD <sub>50</sub> | 129 µg a.s./bee/day | 1.44                                 | 2.9                           | 0.72 | 1        | 0.023   | 0.03    |
|                                               |                     | 1.25                                 | 2.9                           | 0.72 | 1        | 0.020   | 0.03    |

HQ (hazard quotients) and ETR (exposure toxicity ratio) for oral and contact exposure.

**First-tier assessment of the chronic risk for bees due to the use of A9396G in sunflower for the adjacent crop (BBCH <10)**

| Intended use<br>Active substance              |                     | DW<br>S-metolachlor                  |                               |      |          |         |         |
|-----------------------------------------------|---------------------|--------------------------------------|-------------------------------|------|----------|---------|---------|
| Test design                                   | Endpoint (lab.)     | Single Application rate (kg a.s./ha) | Shortcut Value (upward spray) | TWA  | fDep/ Ef | HQ/ ETR | Trigger |
| Chronic adult oral toxicity LDD <sub>50</sub> | 129 µg a.s./bee/day | 1.44                                 | 5.8                           | 0.72 | 0.0033   | 0.000   | 0.03    |
|                                               |                     | 1.25                                 | 5.8                           | 0.72 | 0.0033   | 0.000   | 0.03    |

HQ (hazard quotients) and ETR (exposure toxicity ratio) for oral and contact exposure.

**First-tier assessment of the chronic risk for bees due to the use of A9396G in sunflower for field margin (BBCH <10)**

| Intended use<br>Active substance |  | DW<br>S-metolachlor |  |  |  |  |  |
|----------------------------------|--|---------------------|--|--|--|--|--|
|----------------------------------|--|---------------------|--|--|--|--|--|

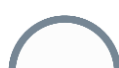

| Test design                                   | Endpoint (lab.)     | Single Application rate (kg a.s./ha) | Shortcut Value (upward spray) | TWA  | fDep/ Ef | HQ/ ETR | Trigger |
|-----------------------------------------------|---------------------|--------------------------------------|-------------------------------|------|----------|---------|---------|
| Chronic adult oral toxicity LDD <sub>50</sub> | 129 µg a.s./bee/day | 1.44                                 | 2.9                           | 0.72 | 0.0092   | 0.000   | 0.03    |
|                                               |                     | 1.25                                 | 2.9                           | 0.72 | 0.0092   | 0.000   | 0.03    |

HQ (hazard quotients) and ETR (exposure toxicity ratio) for oral and contact exposure.

The Tier 1 adult chronic assessment for all scenarios shows acceptable risk from oral exposure of adult honey bees following applications of A9396G to maize and sunflower according to the proposed use pattern.

### “Effects on other arthropod species (Regulation (EU) N° 283/2013, Annex Part A, point 8.3.2 and Regulation (EU) N° 284/2013 Annex Part A, point 10.3.2)

#### Extended laboratory tests, aged residue tests

| Species                      | Life stage                  | Test substance <sup>1</sup> , substrate           | Time scale | Dose (kg a.s./ha) | End point               | % effect                                                                                  | ER <sub>50</sub>                                                               |
|------------------------------|-----------------------------|---------------------------------------------------|------------|-------------------|-------------------------|-------------------------------------------------------------------------------------------|--------------------------------------------------------------------------------|
| <i>Aphidius rhopalosiphi</i> | < 48 h                      | A9396C, extended laboratory (Barley plants); 3D   | 48 h       | 1,5               | Mortality, reproduction | 0 % mortality at 48-h at 1.6 L/ha, 13.6 % effect on fecundity                             | LR <sub>50</sub> > 1,5 kg a.s./ha, ER <sub>reproduction</sub> ≥ 1,5 kg a.s./ha |
| <i>Typhlodromus pyri</i>     | 1 day old                   | A9396C, extended laboratory (Bean leaf discs); 2D | 7 d        | 1,5               | Mortality, reproduction | 21 % effect on mortality at 7-d at 1.6L/ha, and a 40 % decrease in fecundity at this rate | LR <sub>50</sub> > 1,5 kg a.s./ha, ER <sub>reproduction</sub> ≥ 1,5 kg a.s./ha |
| Additional species           |                             |                                                   |            |                   |                         |                                                                                           |                                                                                |
| <i>Aleochara bilineata</i>   | 1 – 5 day old adult beetles | A9396C, extended laboratory (sand); 2D            | 28 d       | 1,5               | Reproduction            | 8.4 % reduction in parasitisation relative to the control at 1.6 L/ha                     | ER <sub>reproduction</sub> ≥ 1,5 kg a.s./ha                                    |
| <i>Poecilus cupreus</i>      | 3 week old adults           | A9396C, extended laboratory (sand); 2D            | 14 d       | 1,5               | Mortality, reproduction | 0 % mortality at 14-d at 1.6 L/ha, 27.6 % increase in feeding rate                        | LR <sub>50</sub> > 1,5 kg a.s./ha, ER <sub>feeding</sub> ≥ 1,5 kg a.s./ha      |

<sup>1</sup>All studies were conducted with 960 g a.s./L formulations (ca. 90% a.s. on a w/w basis). Detailed information on the composition of A9396B, A9396C and A9396G can be found in the confidential part of this dossier. Since testing has not been carried out using A9396G, and given the similarity between A9396G and A9396C, the risk assessment was conducted using endpoints derived for the C variant.



**Risk assessment for –Maize/Sunflower (BBCH<10), Maize (BBCH11-18) /1 × 1.44 kg a.s./ha based on extended lab test or aged residue tests**

| Species                                   | ER <sub>50</sub> (kg a.s./ha) | In-field rate (kg a.s./ha) | Off-field rate (kg a.s./ha)* |
|-------------------------------------------|-------------------------------|----------------------------|------------------------------|
| <i>Aphidius rhopalosiphi</i> <sup>1</sup> | 1.5                           | 1.44                       | 0.199(3D, 1m, 2.77 %)        |
| <i>Typhlodromus pyri</i> <sup>2</sup>     | 1.5                           | 1.44                       | 0.04(2D, 1m, 2.77 %)         |
| <i>Aleochara bilineata</i> <sup>3</sup>   | 1.5                           | 1.44                       | 0.04 (2D, 1m, 2.77 %)        |
| <i>Poecilus cupreus</i> <sup>4</sup>      | 1.5                           | 1.44                       | 0.04 (2D, 1m, 2.77 %)        |

<sup>1</sup> 3D – extends laboratory test on barley plants

<sup>2</sup> 2D – extended laboratory test on leaf discs

<sup>3</sup> 2D – extended laboratory test on sand

<sup>4</sup> 2D - extended laboratory test on sand

\* Correction Factor is used since a limited number of indicator species are tested when compared to the range of species which could be exposed in off-field habitats, a 5-fold uncertainty (correction) factor was included to the calculation to ensure a higher rate is tested which covers the inter-species variability in sensitivity of off-field non-target arthropod species to plant protection products (ESCORT 2, P18)

**Risk assessment for – Maize/Sunflower (BBCH<10), Maize (BBCH11-18) /1 × 1.25 kg a.s./ha based on extended lab test or aged residue tests**

| Species                                   | ER <sub>50</sub> (kg a.s./ha) | In-field rate (kg a.s./ha) | Off-field rate (kg a.s./ha)* |
|-------------------------------------------|-------------------------------|----------------------------|------------------------------|
| <i>Aphidius rhopalosiphi</i> <sup>1</sup> | 1.5                           | 1.25                       | 0.173(3D, 1m, 2.77 %)        |
| <i>Typhlodromus pyri</i> <sup>2</sup>     | 1.5                           | 1.25                       | 0.035(2D, 1m, 2.77 %)        |
| <i>Aleochara bilineata</i> <sup>3</sup>   | 1.5                           | 1.25                       | 0.035 (2D, 1m, 2.77 %)       |
| <i>Poecilus cupreus</i> <sup>4</sup>      | 1.5                           | 1.25                       | 0.035 (2D, 1m, 2.77 %)       |

<sup>1</sup> 3D – extends laboratory test on barley plants

<sup>2</sup> 2D – extended laboratory test on leaf discs

<sup>3</sup> 2D – extended laboratory test on sand

<sup>4</sup> 2D - extended laboratory test on sand

\* Correction Factor is used since a limited number of indicator species are tested when compared to the range of species which could be exposed in off-field habitats, a 5-fold uncertainty (correction) factor was included to the calculation to ensure a higher rate is tested which covers the inter-species variability in sensitivity of off-field non-target arthropod species to plant protection products (ESCORT 2, P18)

**Effects on non-target soil meso- and macro fauna; effects on soil nitrogen transformation (Regulation (EU) N° 283/2013, Annex Part A, points 8.4, 8.5, and Regulation (EU) N° 284/2013 Annex Part A, points 10.4, 10.5)**

| Test organism                    | Test substance  | Application method of test a.s./ OM | Time scale | End point                       | Toxicity                                                                                                                                                                                                           |
|----------------------------------|-----------------|-------------------------------------|------------|---------------------------------|--------------------------------------------------------------------------------------------------------------------------------------------------------------------------------------------------------------------|
| <b>Earthworms</b>                |                 |                                     |            |                                 |                                                                                                                                                                                                                    |
| <i>Eisenia fetida</i>            | A9396G          | Mixed into soil<br>5 % peat         | Chronic    | Reproduction                    | NOEC = 29.4 mg /kg soil dw (equivalent to 25.3 mg a.s./kg)<br>EC <sub>10</sub> = 37.6 mg /kg soil dw (equivalent to 32.4 mg a.s./kg)<br>NOEC <sub>corr</sub> = 14.7 mg /kg soil dw (equivalent to 25.3 mg a.s./kg) |
| <i>Eisenia fetida</i>            | CGA354743 (ESA) | Mixed into soil<br>5 % peat         | Chronic    | Growth, reproduction, mortality | NOEC = 100 mg/kg soil dw<br>EC <sub>10</sub> > 100 mg/kg soil dw<br>NOEC <sub>corr</sub> = 50 mg/kg soil dw                                                                                                        |
| <i>Eisenia fetida</i>            | CGA51202 (OXA)  | Mixed into soil<br>5 % peat         | Chronic    | Reproduction                    | NOEC = 55.6 mg/kg soil dw<br>EC <sub>10</sub> = 74.8 mg/kg soil dw<br>NOEC <sub>corr</sub> = 27.8 mg/kg soil dw                                                                                                    |
| <i>Eisenia fetida</i>            | CGA368208       | Mixed into soil<br>5 % peat         | Chronic    | Reproduction                    | NOEC = 500 mg/kg soil dw<br>EC <sub>10</sub> = 340 mg/kg soil dw<br>EC <sub>10corr</sub> = 170 mg/kg soil dw                                                                                                       |
| <i>Eisenia fetida</i>            | CGA40172        | Mixed into soil<br>5 % peat         | Chronic    | Reproduction                    | NOEC = 250 mg/kg soil dw<br>EC <sub>10</sub> = 244 mg/kg soil dw<br>EC <sub>10corr</sub> = 122 mg/kg soil dw                                                                                                       |
| <i>Eisenia fetida</i>            | CGA50720        | Mixed into soil<br>5 % peat         | Chronic    | Growth, reproduction, mortality | NOEC = 1000 mg/kg soil dw<br>NOEC <sub>corr</sub> = 500 mg/kg soil dw                                                                                                                                              |
| <i>Eisenia fetida</i>            | CGA37735        | Mixed into soil<br>5 % peat         | Chronic    | Reproduction                    | NOEC = 500 mg/kg soil dw<br>EC <sub>10</sub> = 357 mg/kg soil dw<br>EC <sub>10corr</sub> = 178.5 mg/kg soil dw                                                                                                     |
| <i>Eisenia fetida</i>            | NOA436611       | Mixed into soil<br>5 % peat         | Chronic    | Reproduction, Biomass           | NOEC = 55.6 mg/kg soil dw<br>EC <sub>10</sub> = 56 mg/kg soil dw<br>NOEC <sub>corr</sub> = 27.8 mg/kg soil dw                                                                                                      |
| <b>Other soil macroorganisms</b> |                 |                                     |            |                                 |                                                                                                                                                                                                                    |

| Test organism              | Test substance  | Application method of test a.s./ OM | Time scale | End point               | Toxicity                                                                                                         |
|----------------------------|-----------------|-------------------------------------|------------|-------------------------|------------------------------------------------------------------------------------------------------------------|
| <i>Folsomia candida</i>    | A9396G          | Mixed into soil<br>5 % peat         | Chronic    | Reproduction            | NOEC = 260 mg/kg soil dw<br>EC <sub>10</sub> = 195.5 mg/kg soil dw<br>EC <sub>10corr</sub> = 97.75 mg/kg soil dw |
| <i>Folsomia candida</i>    | CGA354743 (ESA) | Mixed into soil<br>5 % peat         | Chronic    | Mortality, reproduction | NOEC = 1000 mg/kg soil dw<br>NOEC <sub>corr</sub> = 500 mg/kg soil dw                                            |
| <i>Folsomia candida</i>    | CGA51202 (OXA)  | Mixed into soil<br>5 % peat         | Chronic    | Mortality, reproduction | NOEC = 1000 mg/kg soil dw<br>NOEC <sub>corr</sub> = 500 mg/kg soil dw                                            |
| <i>Folsomia candida</i>    | CGA368208       | Mixed into soil<br>5 % peat         | Chronic    | Mortality, reproduction | NOEC = 1000 mg/kg soil dw<br>NOEC <sub>corr</sub> = 500 mg/kg soil dw                                            |
| <i>Folsomia candida</i>    | CGA40172        | Mixed into soil<br>5 % peat         | Chronic    | Reproduction            | NOEC = 500 mg/kg soil dw<br>EC <sub>10</sub> = 567 mg/kg soil dw<br>NOEC <sub>corr</sub> = 250 mg/kg soil dw     |
| <i>Folsomia candida</i>    | CGA50720        | Mixed into soil<br>5 % peat         | Chronic    | Reproduction            | NOEC = 500 mg/kg soil dw<br>EC <sub>10</sub> = 700 mg/kg soil dw<br>NOEC <sub>corr</sub> = 250 mg/kg soil dw     |
| <i>Folsomia candida</i>    | CGA37735        | Mixed into soil<br>5 % peat         | Chronic    | Reproduction            | NOEC = 31.25 mg/kg soil dw<br>EC <sub>10</sub> = 17.1 mg/kg soil dw<br>EC <sub>10corr</sub> = 8.55 mg/kg soil dw |
| <i>Folsomia candida</i>    | NOA436611       | Mixed into soil<br>5 % peat         | Chronic    | Reproduction            | NOEC = 125 mg/kg soil dw<br>EC <sub>10</sub> = 217.5 mg/kg soil dw<br>NOEC <sub>corr</sub> = 62.5 mg/kg soil dw  |
| <i>Hypoaspis aculeifer</i> | A9396G          | Mixed into soil<br>5 % peat         | Chronic    | Mortality, reproduction | NOEC = 1000 mg/kg soil dw<br>NOEC <sub>corr</sub> = 500 mg/kg soil dw                                            |
| <i>Hypoaspis aculeifer</i> | CGA354743 (ESA) | Mixed into soil<br>5 % peat         | Chronic    | Mortality, reproduction | NOEC = 1000 mg/kg soil dw<br>NOEC <sub>corr</sub> = 500 mg/kg soil dw                                            |
| <i>Hypoaspis aculeifer</i> | CGA51202 (OXA)  | Mixed into soil<br>5 % peat         | Chronic    | Mortality, reproduction | NOEC = 1000 mg/kg soil dw<br>NOEC <sub>corr</sub> = 500 mg/kg soil dw                                            |
| <i>Hypoaspis aculeifer</i> | CGA368208       | Mixed into soil<br>5 % peat         | Chronic    | Mortality, reproduction | NOEC = 1000 mg/kg soil dw<br>NOEC <sub>corr</sub> = 500 mg/kg soil dw                                            |

| Test organism              | Test substance | Application method of test a.s./ OM | Time scale | End point               | Toxicity                                                              |
|----------------------------|----------------|-------------------------------------|------------|-------------------------|-----------------------------------------------------------------------|
| <i>Hypoaspis aculeifer</i> | CGA40172       | Mixed into soil<br>5 % peat         | Chronic    | Mortality, reproduction | NOEC = 1000 mg/kg soil dw<br>NOEC <sub>corr</sub> = 500 mg/kg soil dw |
| <i>Hypoaspis aculeifer</i> | CGA50720       | Mixed into soil<br>5 % peat         | Chronic    | Mortality, reproduction | NOEC = 1000 mg/kg soil dw<br>NOEC <sub>corr</sub> = 500 mg/kg soil dw |
| <i>Hypoaspis aculeifer</i> | CGA37735       | Mixed into soil<br>5 % peat         | Chronic    | Mortality, reproduction | NOEC = 1000 mg/kg soil dw<br>NOEC <sub>corr</sub> = 500 mg/kg soil dw |
| <i>Hypoaspis aculeifer</i> | NOA436611      | Mixed into soil<br>5 % peat         | Chronic    | Mortality, reproduction | NOEC = 1000 mg/kg soil dw<br>NOEC <sub>corr</sub> = 500 mg/kg soil dw |

A field study in a maize field in southern Germany showed that the application of A9396C, a formulation similar to A9396G, had no significant effects on earthworm numbers and biomass up to 12 months after the application of 1250 and 1900 g a.s./ha.

#### Soil nitrogen transformation

| Test substance                                                                      | Test concentration (adverse effects < 25%)<br>[mg /kg] | PEC SOIL<br>[mg/kg] | Risk acceptable<br>[yes/no] |
|-------------------------------------------------------------------------------------|--------------------------------------------------------|---------------------|-----------------------------|
| <b>Use in pre-emergent maize and sunflower crops at 1440 g a.s./ha (worst case)</b> |                                                        |                     |                             |
| A9396G                                                                              | 14.75                                                  | 2.22                | yes                         |
| S-metolachlor                                                                       | 14.55                                                  | 1.92                | yes                         |
| CGA354743 (ESA)                                                                     | 3.92                                                   | 2.34                | yes                         |
| CGA51202 (OXA)                                                                      | 3.12                                                   | 1.78                | yes                         |
| CGA368208                                                                           | 1.25                                                   | 0.150               | yes                         |
| CGA40172                                                                            | 13.1                                                   | 0.135               | yes                         |
| CGA50720                                                                            | 0.92                                                   | 0.115               | yes                         |
| CGA37735                                                                            | 9.28                                                   | 0.093               | yes                         |
| NOA436611                                                                           | 22.1                                                   | 0.324               | yes                         |

#### Toxicity/exposure ratios for soil organisms

Use in pre-emergent maize and sunflower crops at 1440 g a.s./ha (worst case use)

| Test organism         | Test substance | Time scale | Soil PEC          | TER | Trigger |
|-----------------------|----------------|------------|-------------------|-----|---------|
| <b>Earthworms</b>     |                |            |                   |     |         |
| <i>Eisenia fetida</i> | A9693G         | Chronic    | 2.22 <sup>1</sup> | 6.6 | 5       |

| Test organism              | Test substance  | Time scale | Soil PEC           | TER    | Trigger |
|----------------------------|-----------------|------------|--------------------|--------|---------|
| <i>Eisenia fetida</i>      | CGA354743 (ESA) | Chronic    | 2.353 <sup>2</sup> | 21.2   | 5       |
| <i>Eisenia fetida</i>      | CGA51202 (OXA)  | Chronic    | 1.801 <sup>2</sup> | 15.4   | 5       |
| <i>Eisenia fetida</i>      | CGA368208       | Chronic    | 0.168 <sup>2</sup> | 1011.9 | 5       |
| <i>Eisenia fetida</i>      | CGA40172        | Chronic    | 0.131 <sup>2</sup> | 931.3  | 5       |
| <i>Eisenia fetida</i>      | CGA50720        | Chronic    | 0.115 <sup>1</sup> | 4348   | 5       |
| <i>Eisenia fetida</i>      | CGA37735        | Chronic    | 0.093 <sup>1</sup> | 1919   | 5       |
| <i>Eisenia fetida</i>      | NOA436611       | Chronic    | 0.421 <sup>1</sup> | 86     | 5       |
| Other soil macroorganisms  |                 |            |                    |        |         |
| <i>Folsomia candida</i>    | A9693G          | Chronic    | 2.22 <sup>1</sup>  | 44     | 5       |
| <i>Folsomia candida</i>    | CGA354743 (ESA) | Chronic    | 2.353 <sup>2</sup> | 212.5  | 5       |
| <i>Folsomia candida</i>    | CGA51202 (OXA)  | Chronic    | 1.801 <sup>2</sup> | 138.8  | 5       |
| <i>Folsomia candida</i>    | CGA368208       | Chronic    | 0.168 <sup>2</sup> | 2976.2 | 5       |
| <i>Folsomia candida</i>    | CGA40172        | Chronic    | 0.131 <sup>2</sup> | 1908.4 | 5       |
| <i>Folsomia candida</i>    | CGA50720        | Chronic    | 0.115 <sup>1</sup> | 2173.9 | 5       |
| <i>Folsomia candida</i>    | CGA37735        | Chronic    | 0.093 <sup>1</sup> | 92     | 5       |
| <i>Folsomia candida</i>    | NOA436611       | Chronic    | 0.421 <sup>1</sup> | 148.5  | 5       |
| <i>Hypoaspis aculeifer</i> | A9693G          | Chronic    | 2.22 <sup>1</sup>  | 225    | 5       |
| <i>Hypoaspis aculeifer</i> | CGA354743 (ESA) | Chronic    | 2.353 <sup>2</sup> | 212.5  | 5       |
| <i>Hypoaspis aculeifer</i> | CGA51202 (OXA)  | Chronic    | 1.801 <sup>2</sup> | 277.6  | 5       |
| <i>Hypoaspis aculeifer</i> | CGA368208       | Chronic    | 0.168 <sup>2</sup> | 2976.2 | 5       |
| <i>Hypoaspis aculeifer</i> | CGA40172        | Chronic    | 0.131 <sup>2</sup> | 3816.8 | 5       |
| <i>Hypoaspis aculeifer</i> | CGA50720        | Chronic    | 0.115 <sup>1</sup> | 4347.8 | 5       |
| <i>Hypoaspis aculeifer</i> | CGA37735        | Chronic    | 0.093 <sup>1</sup> | 5376.3 | 5       |
| <i>Hypoaspis aculeifer</i> | NOA436611       | Chronic    | 0.421 <sup>1</sup> | 1187.6 | 5       |

<sup>1</sup>initial PEC<sup>2</sup>peak accum PEC

## Effects on terrestrial non target higher plants (Regulation (EU) N° 283/2013, Annex Part A, point 8.6 and Regulation (EU) N° 284/2013 Annex Part A, point 10.6)

### Screening data

|                                                                                                     |
|-----------------------------------------------------------------------------------------------------|
| Not required for herbicides or plant growth regulators as ER <sub>50</sub> tests should be provided |
|-----------------------------------------------------------------------------------------------------|

### Laboratory dose response tests

The hazard and risk assessment to non target terrestrial plants were discussed at the at the Pesticide Peer Review Teleconference 29.<sup>5</sup> The experts agreed that the vegetative vigour and seedling emergence studies available with the representative formulation are reliable.<sup>6</sup> However, the experts concluded that none of the regulatory studies could be used for the hazard characterisation since most non-target plant species tested belonged to labelled crops tolerant to S-metolachlor. Furthermore, a peer-reviewed publication from the systematic literature search<sup>7</sup> indicated a higher sensitivity of non-crop plants. Owing to the lack of suitable endpoints covering non tolerant species, the risk to non target terrestrial plants could not be assessed for any of the representative uses (data gap).

<sup>1</sup> based on Ganzelmeier drift data

<sup>5</sup> See Experts' consultation points 5.7 and 5.8 at the Pesticide Peer Review Teleconference 29 (October 2020) (EFSA, 2023).

<sup>6</sup> In the vegetative vigour study, cucumber was the most sensitive species tested with an ER<sub>50</sub> based on phytotoxic effects of 610.5 g a.s./ha. In the seedling emergence study, ryegrass was the most sensitive species tested with an ER<sub>50</sub> based on the foliar dry weight of 82.9 g a.s./ha.

<sup>7</sup> Boutin, C., Elmegaard, N. & Kjær, C. Toxicity Testing of Fifteen Non-Crop Plant Species with Six Herbicides in a Greenhouse Experiment: Implications for Risk Assessment. *Ecotoxicology* 13, 349–369 (2004). <https://doi.org/10.1023/B:ECTX.0000033092.82507.f3>

**Effects on biological methods for sewage treatment (Regulation (EU) N° 283/2013, Annex Part A, point 8.8)**

|                    |                      |
|--------------------|----------------------|
| Test type/organism | end point            |
| Activated sludge   | NOEC $\geq$ 100 mg/L |

**Monitoring data (Regulation (EU) N° 283/2013, Annex Part A, point 8.9 and Regulation (EU) N° 284/2013, Annex Part A, point 10.8)**

|                                                                                                                                                                        |
|------------------------------------------------------------------------------------------------------------------------------------------------------------------------|
| Available monitoring data concerning adverse effect of the a.s.<br>No data submitted.<br>Available monitoring data concerning effect of the PPP.<br>No data submitted. |
|------------------------------------------------------------------------------------------------------------------------------------------------------------------------|

**Definition of the residue for monitoring (Regulation (EU) N° 283/2013, Annex Part A, point 7.4.2) Ecotoxicologically relevant compounds<sup>1</sup>**

|             |                                                                                                                                                                                                                                                              |
|-------------|--------------------------------------------------------------------------------------------------------------------------------------------------------------------------------------------------------------------------------------------------------------|
| Compartment |                                                                                                                                                                                                                                                              |
| Soil        | metolachlor (mixture of constituent isomers)                                                                                                                                                                                                                 |
| Water       | metolachlor (mixture of constituent isomers)                                                                                                                                                                                                                 |
| Sediment    | metolachlor (mixture of constituent isomers)                                                                                                                                                                                                                 |
| Groundwater | metolachlor, CGA354743 (ESA), CGA51202 (OXA), CGA357704, CGA368208, CGA37735, CGA40172, CGA50720, NOA413173, NOA436611, SYN542488, SYN542489, SYN542490, SYN542491, SYN542492, SYN542607, SYN545026, SYN545027, SYN547969, SYN547977 all mixtures of isomers |

<sup>1</sup>metabolites are considered relevant when, based on the risk assessment, they pose a risk comparable or higher than the parent

**Classification and labelling with regard to ecotoxicological data (Regulation (EU) N° 283/2013, Annex Part A, Section 10)**

Substance

Harmonised classification according to Regulation (EC) No 1272/2008 and its Adaptations to Technical Process [Table 3.1 of Annex VI of Regulation (EC) No 1272/2008 as amended]<sup>8</sup>:

According to the Peer review, the criteria for classification may be met for:

|                                                                                                                                                  |
|--------------------------------------------------------------------------------------------------------------------------------------------------|
| S-metolachlor                                                                                                                                    |
| Aquatic Acute 1, H400;<br>Aquatic Chronic 1, H410 (Very toxic to aquatic life with long lasting effects)                                         |
| M-factor: acute: 10; chronic: 10 (for non rapidly degradable substances)                                                                         |
| Based on the $E_rC_{50}$ (shoot length) (7d) of 0.062 mg/L for <i>Elodea canadensis</i> and the NOEC (14d) of 0.0021 mg/L for <i>Lemna gibba</i> |
| -                                                                                                                                                |

<sup>8</sup> Regulation (EC) No 1272/2008 of the European Parliament and of the Council of 16 December 2008 on classification, labelling and packaging of substances and mixtures, amending and repealing Directives 67/548/EEC and 1999/45/EC, and amending Regulation (EC) No 1907/2006. OJ L 353, 31.12.2008, 1-1355.

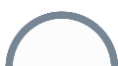

Supplement: EFS2-21-e07852-s001.pdf [file EFS2-21-e07852-s001.pdf]
